# Supplementary material for: A U-system approach for predicting metabolic behaviors and responses based on an alleged metabolic reaction network
Source: PubMed Central journal article supplement (PMC4305983; doi:10.1186/1752-0509-8-s5-s4), 2014-12-12

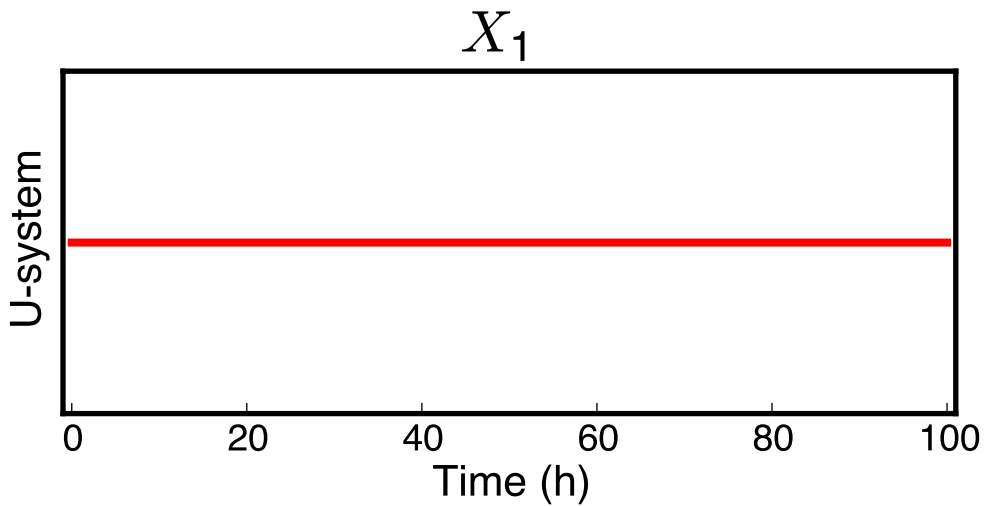

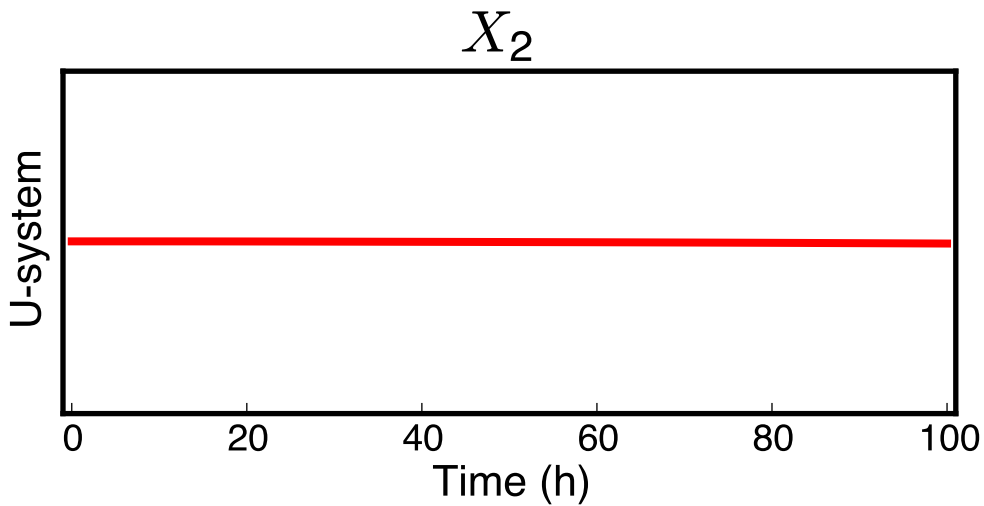

$X_3$

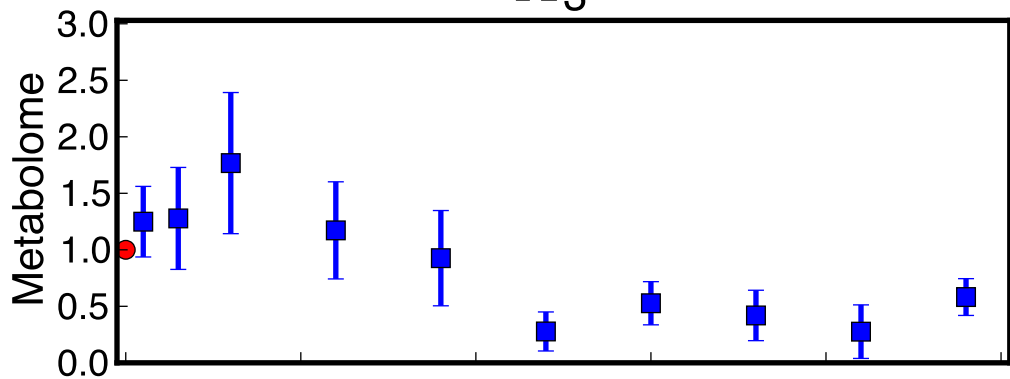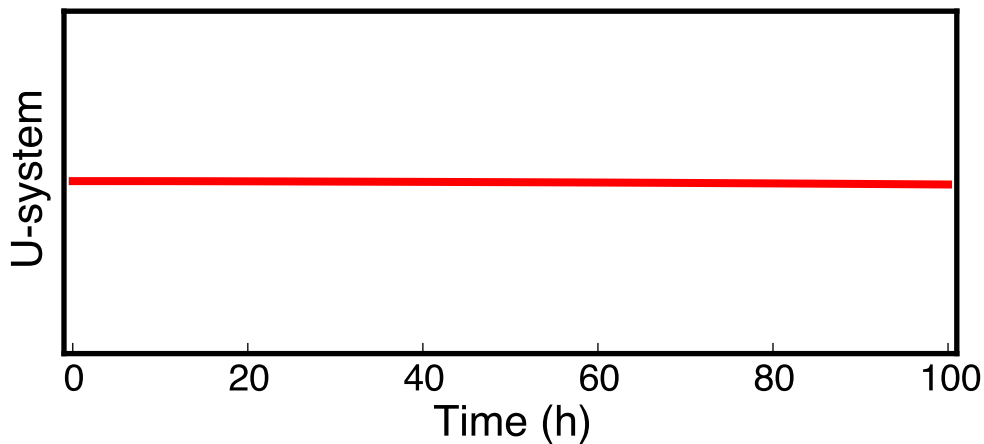

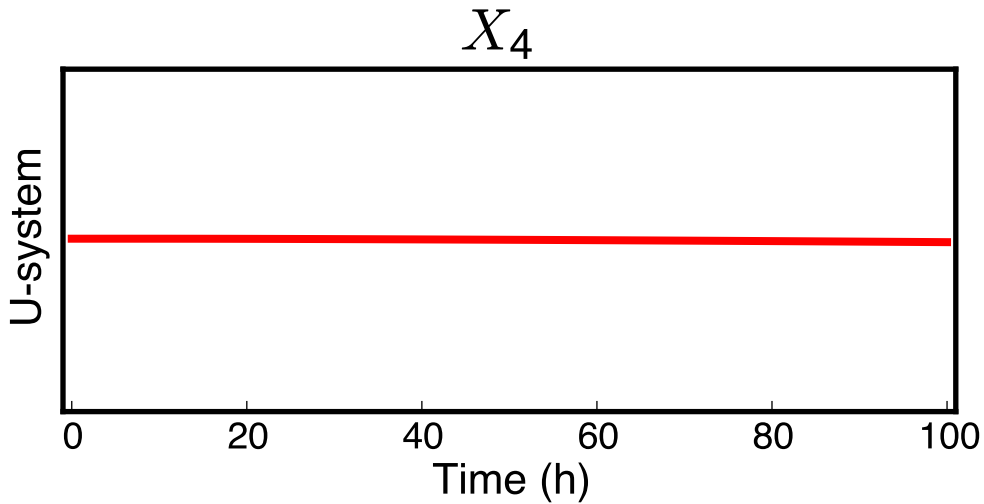

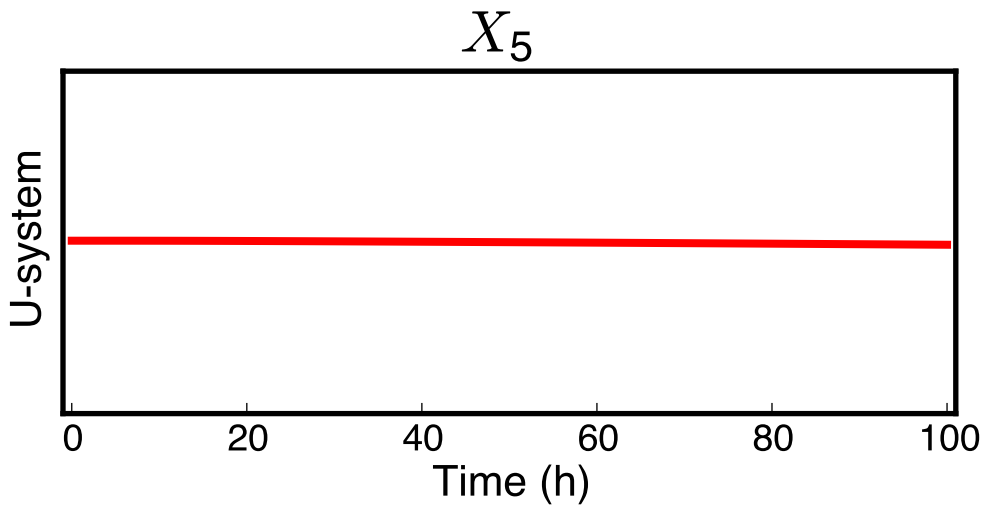

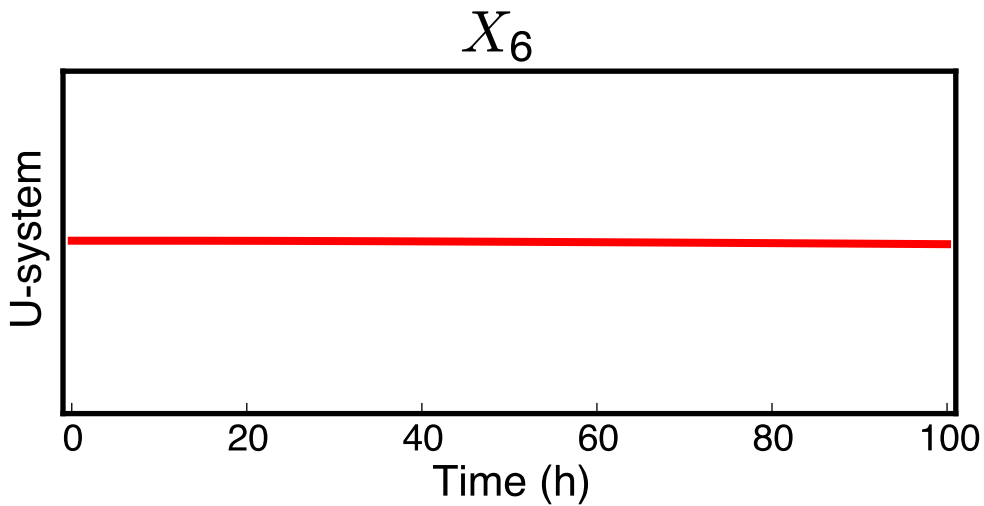

$X_7$

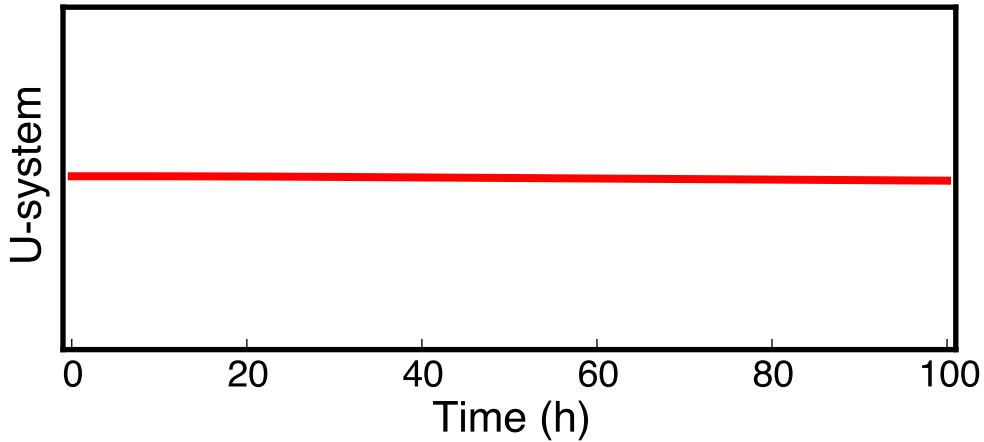

$X_8$

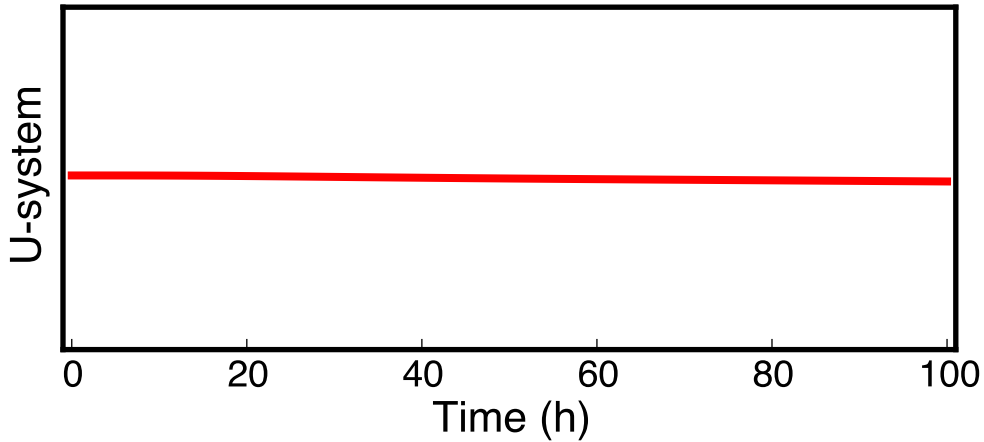



$X_9$

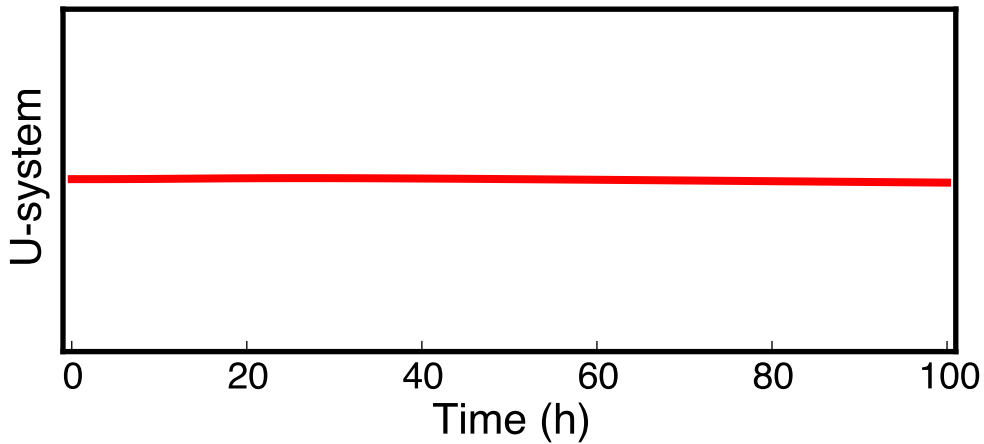

$X_{10}$

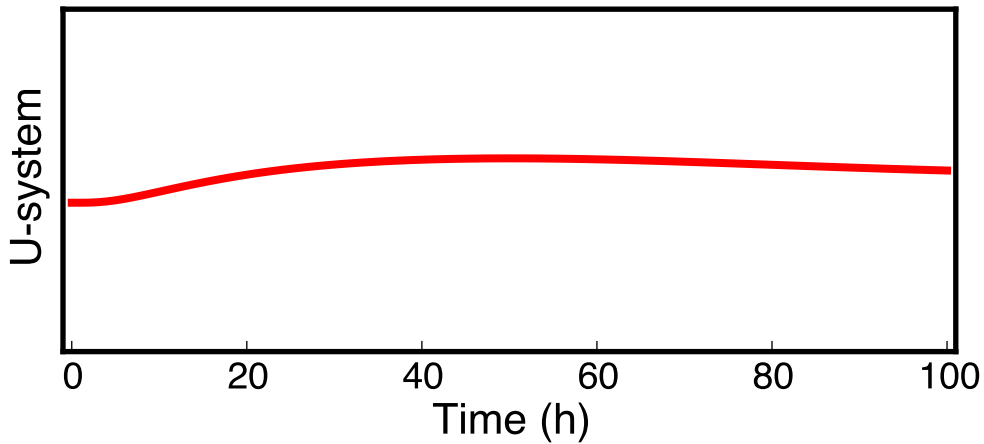

$X_{11}$

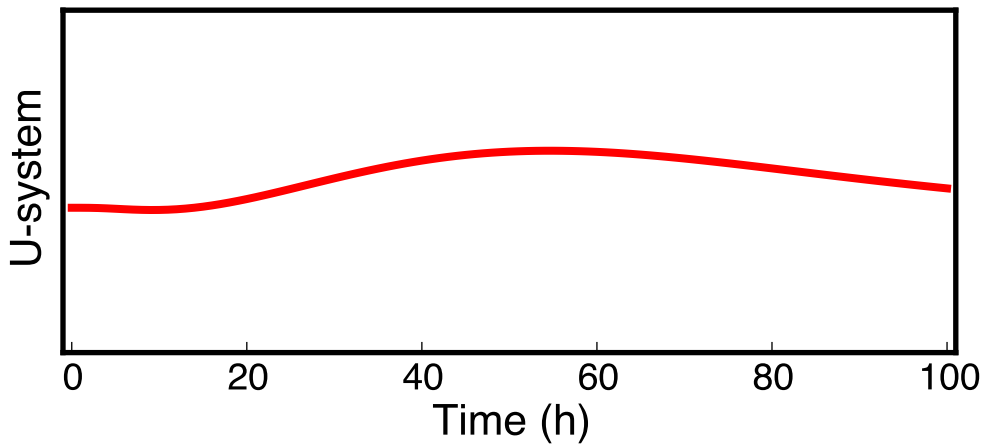

$X_{12}$

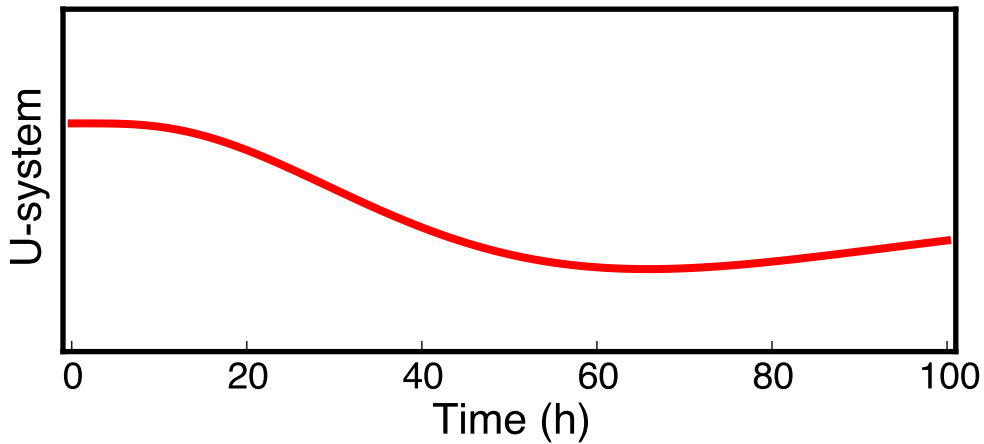

$X_{13}$

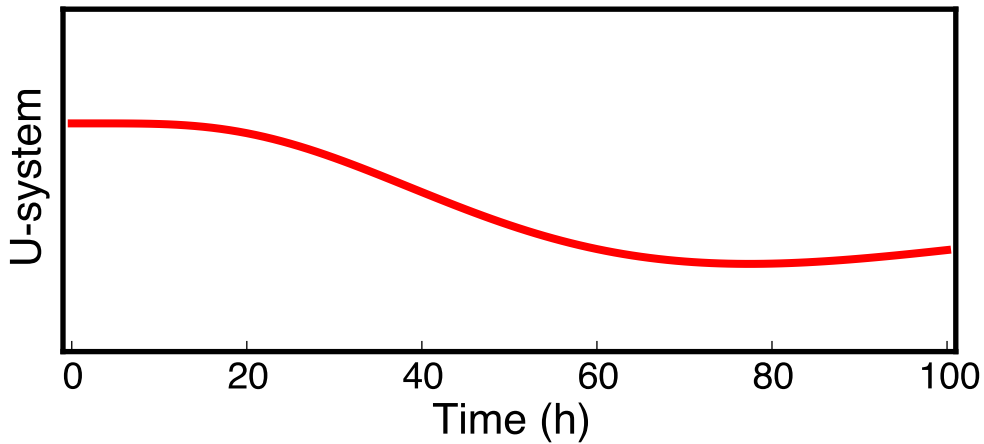

$X_{14}$

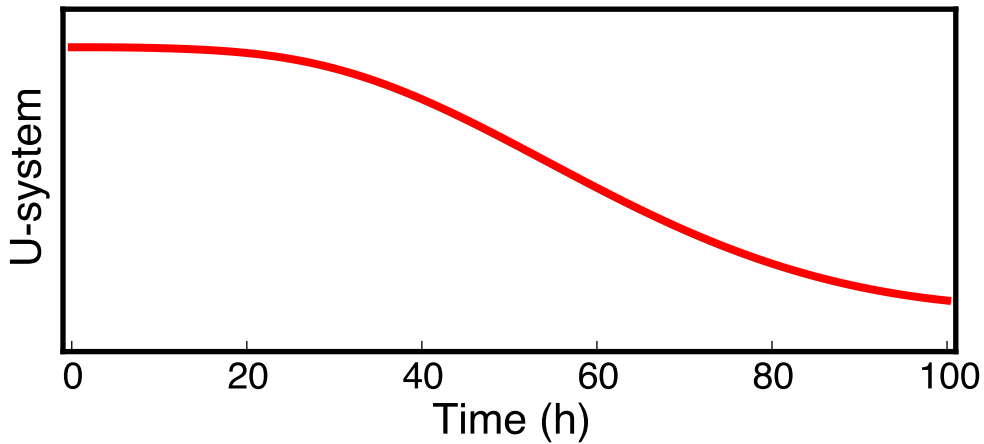

$X_{15}$

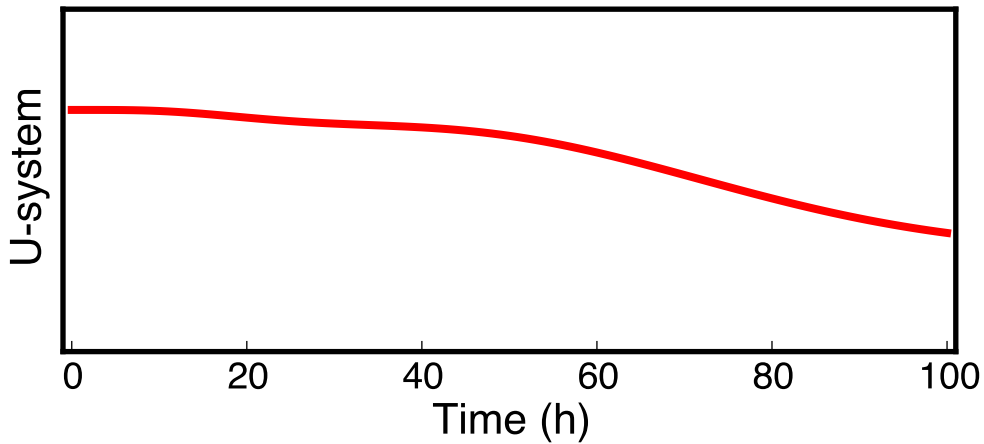

$X_{16}$

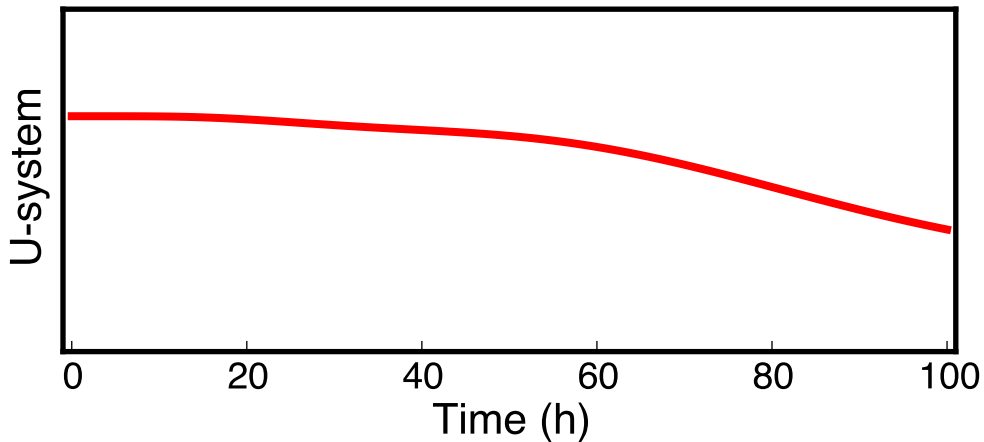



$X_{17}$

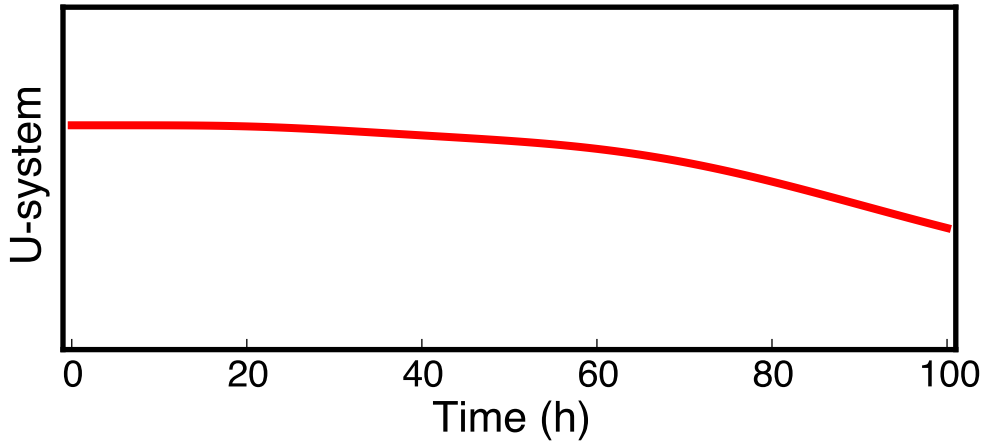

$X_{18}$

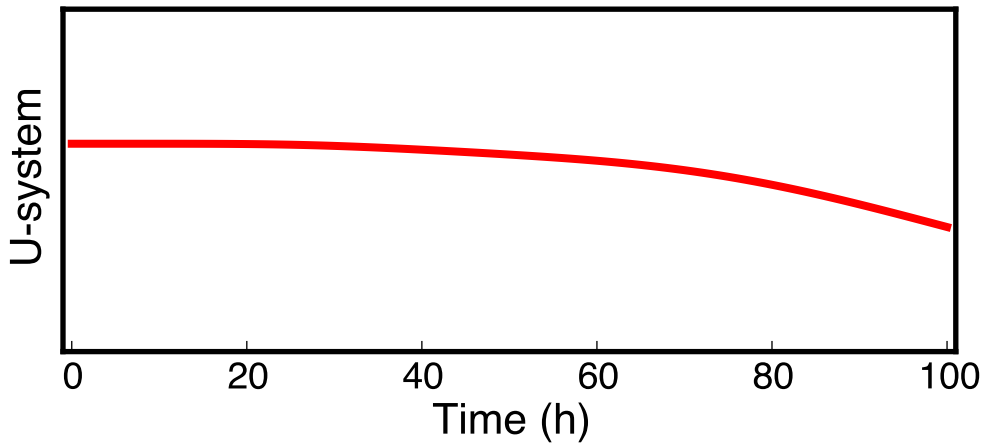

$X_{19}$

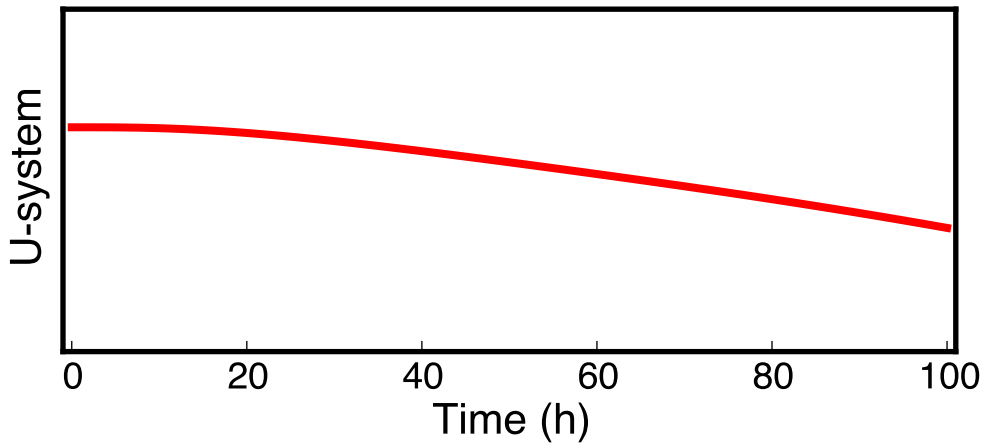

$X_{20}$ 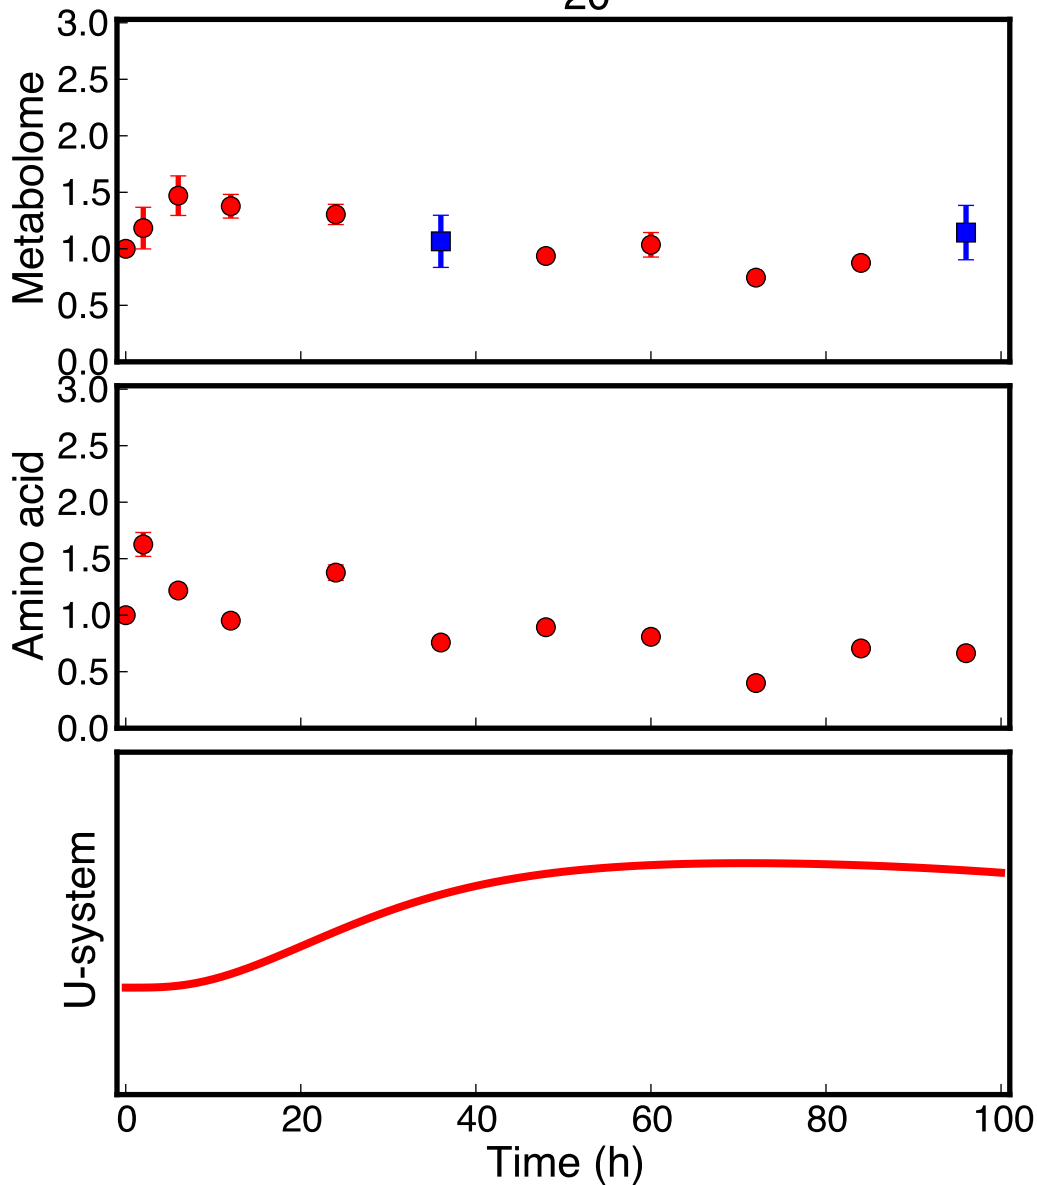

$X_{21}$

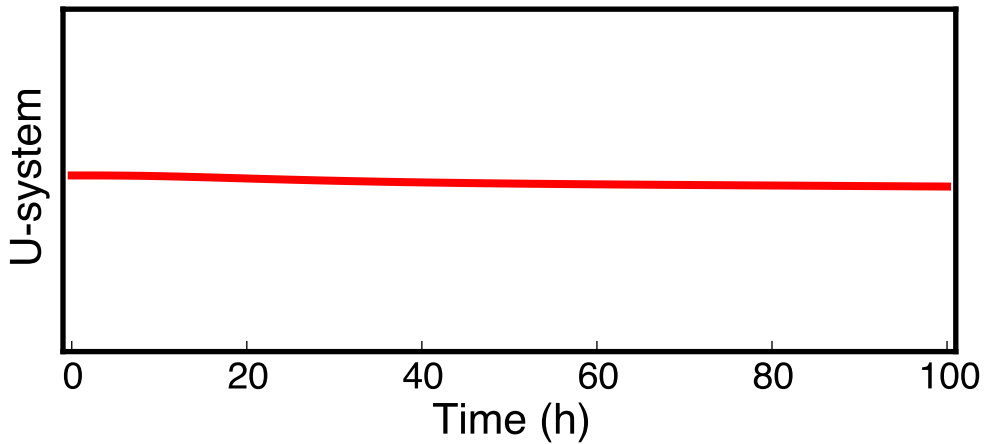

$X_{22}$

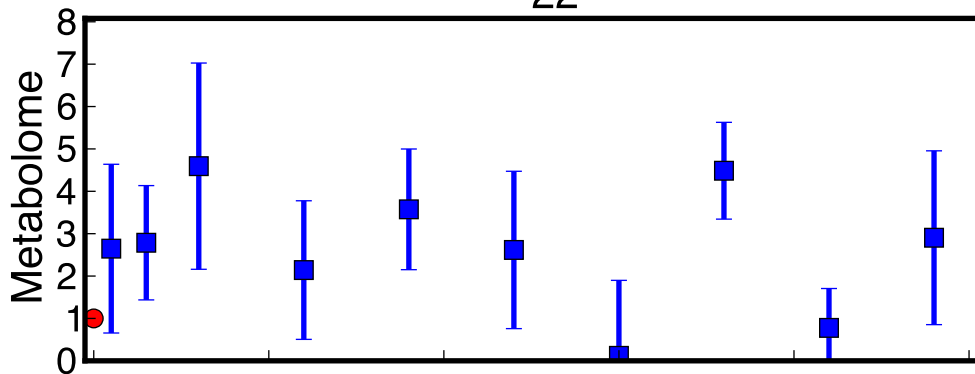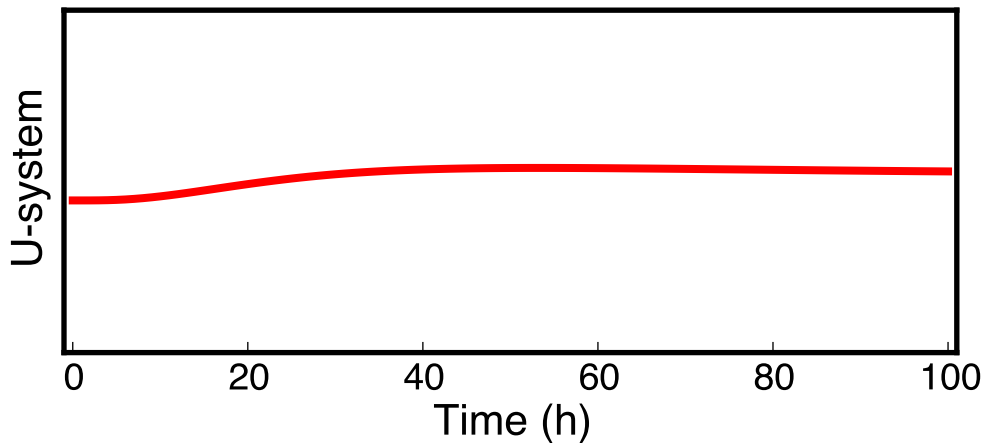

$X_{23}$ 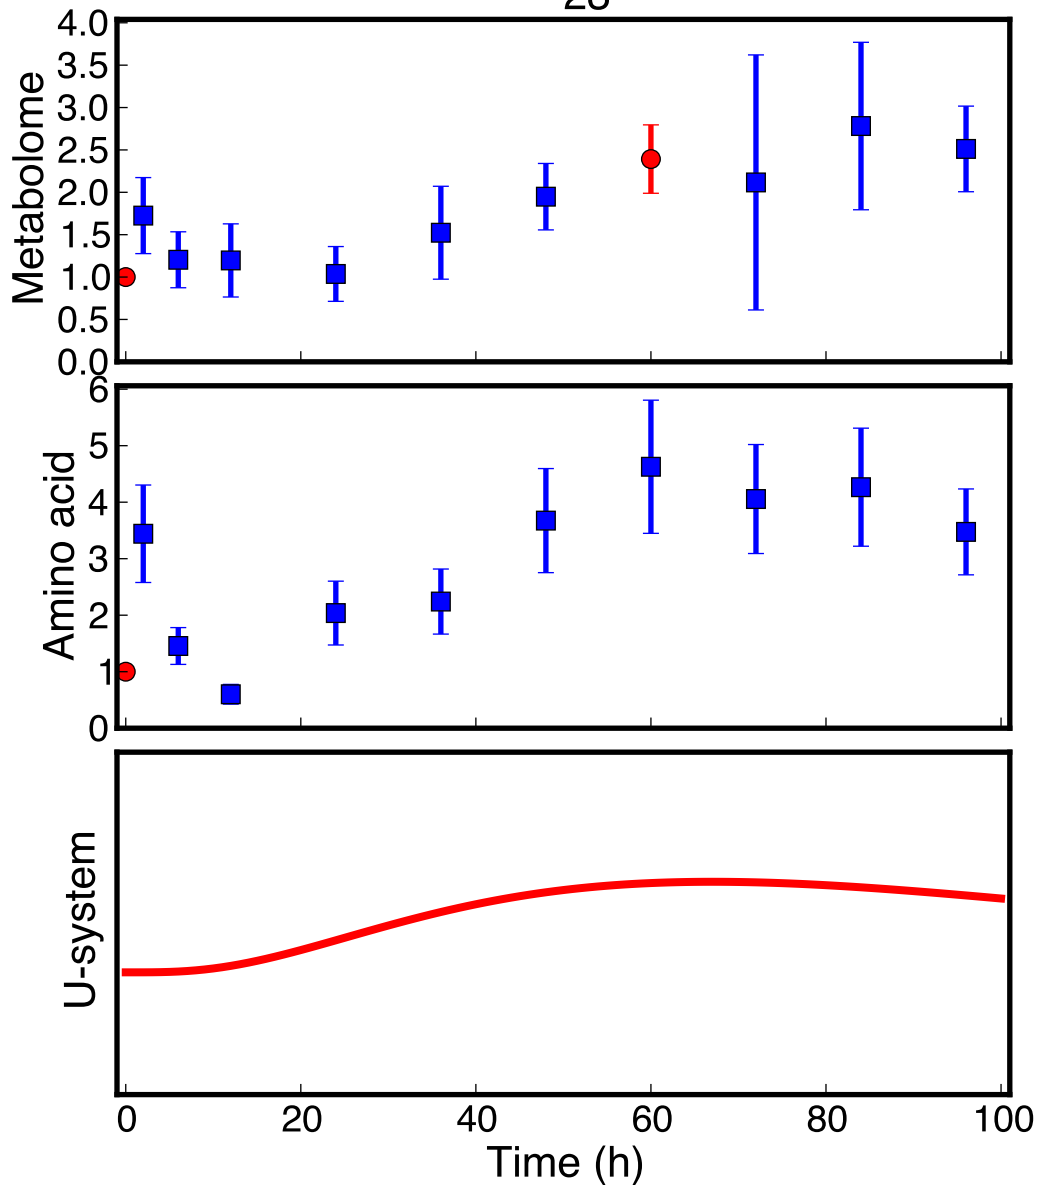

$X_{24}$

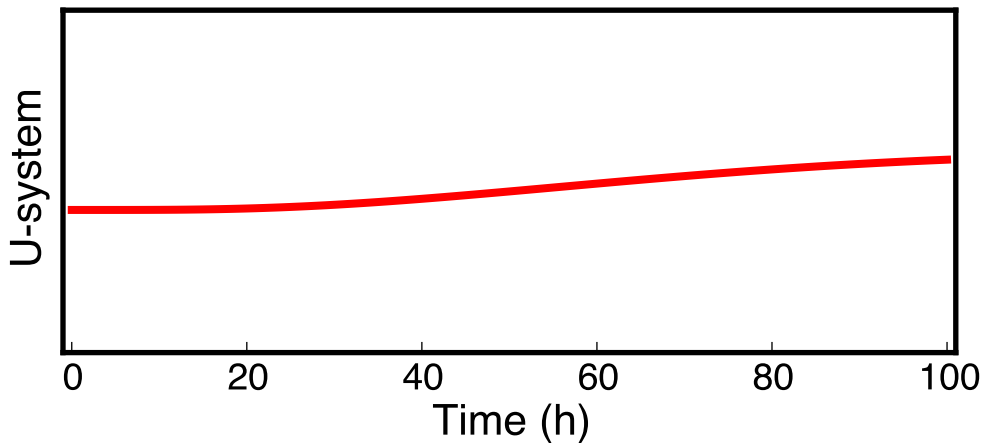



$X_{25}$ 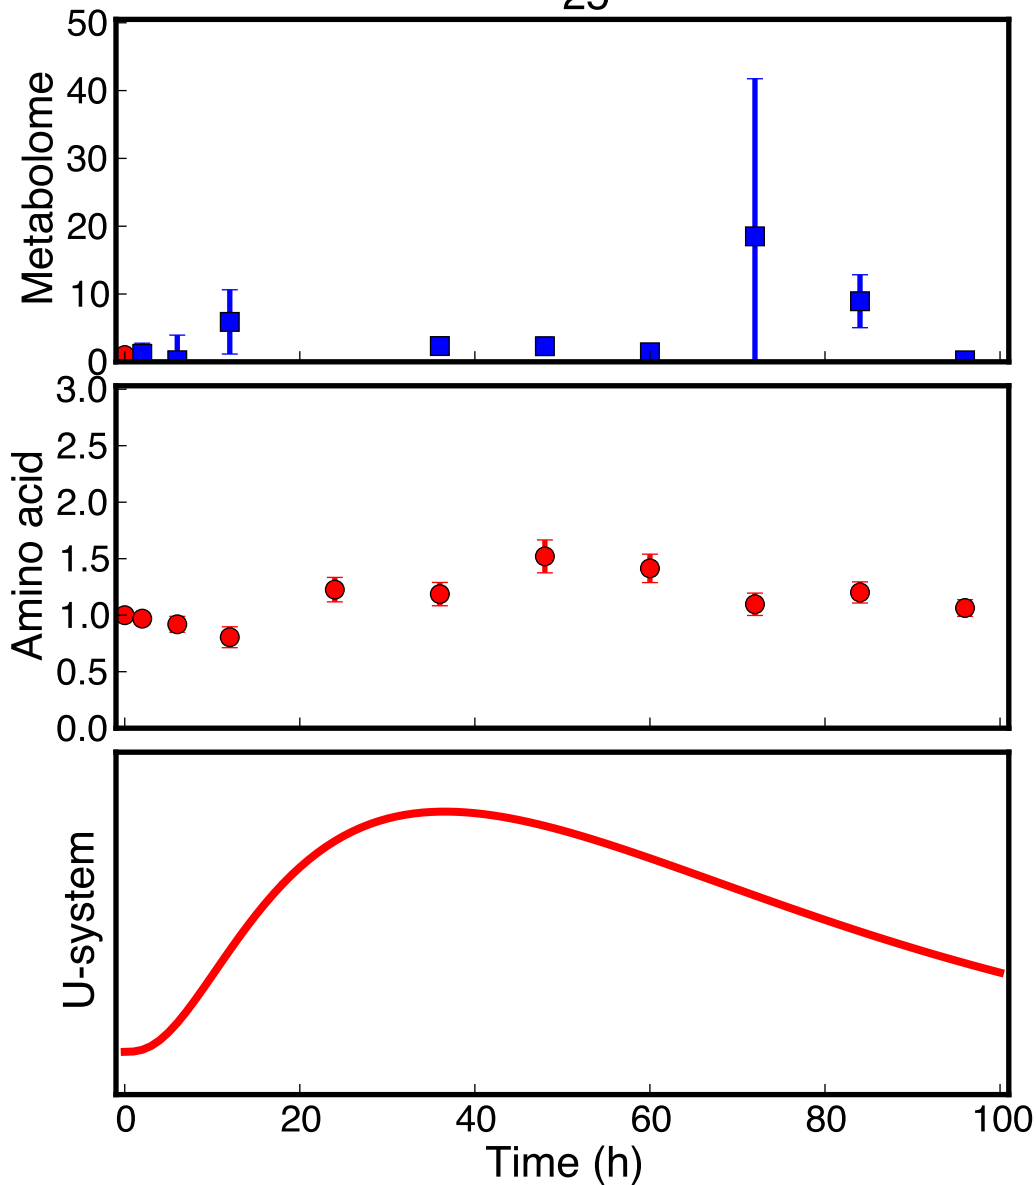

$X_{26}$

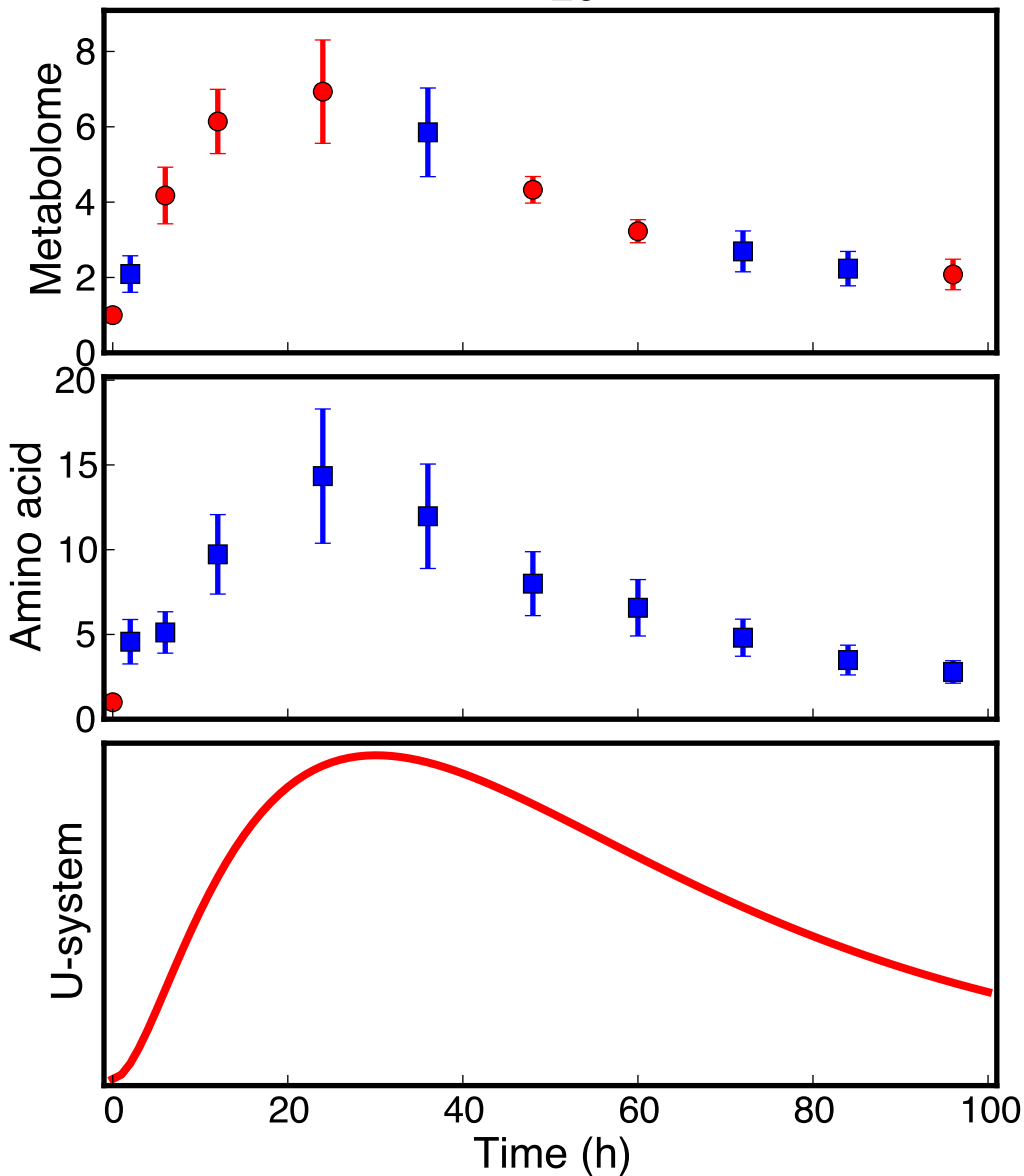

$X_{27}$

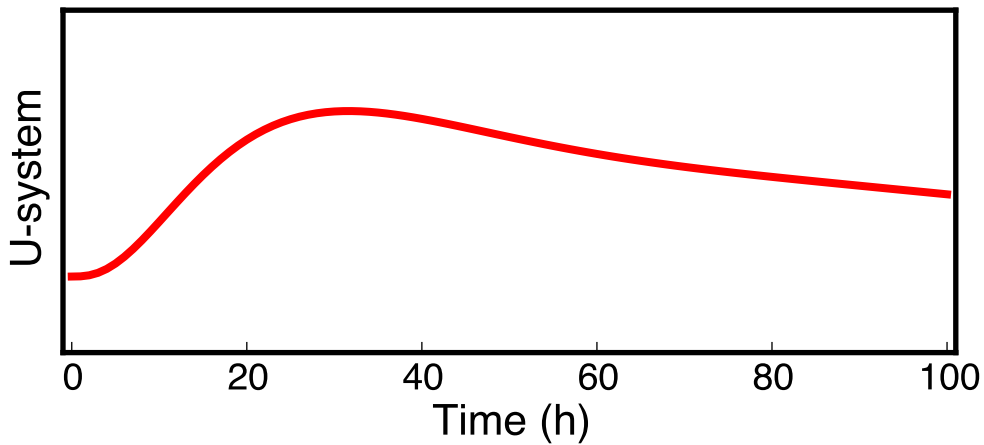

$X_{28}$

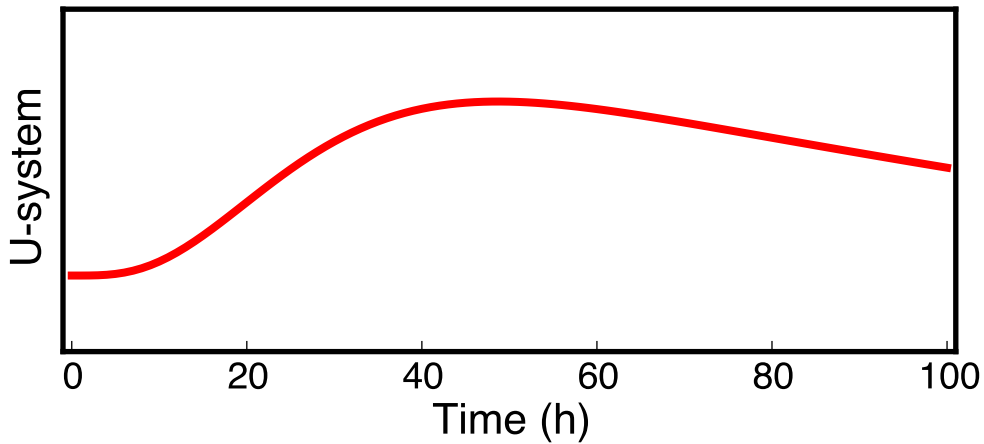

$X_{29}$

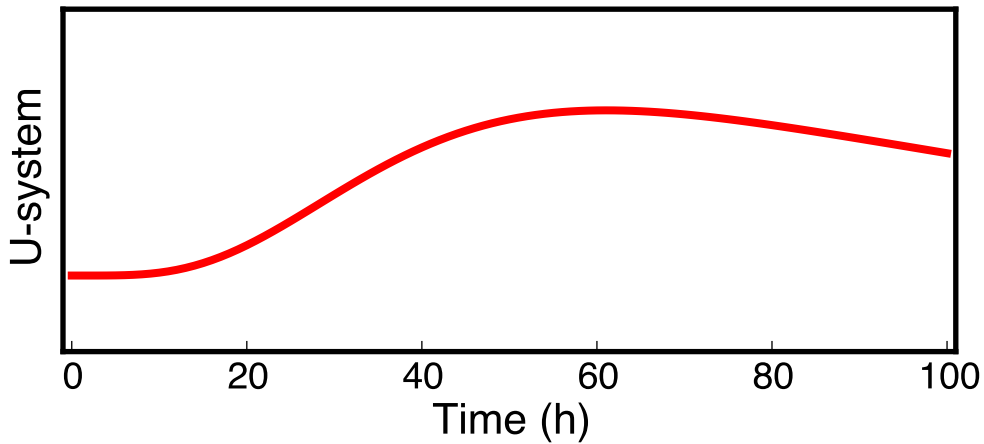

$X_{30}$

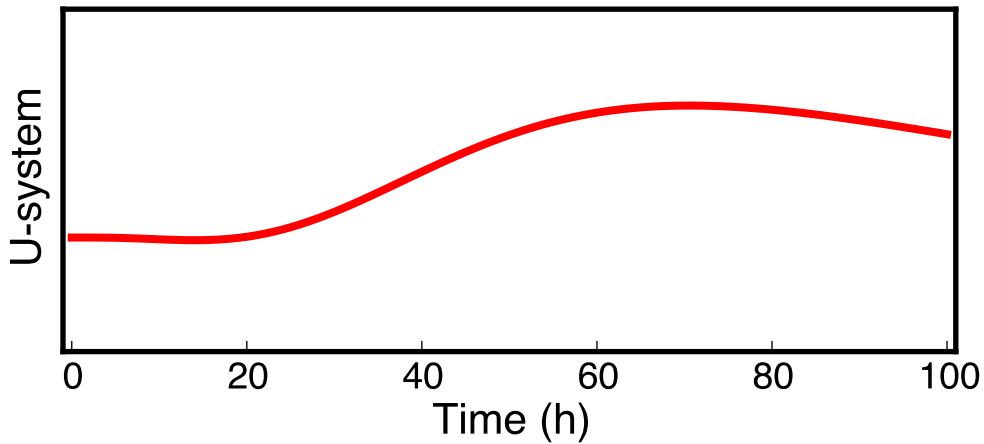

$X_{31}$ 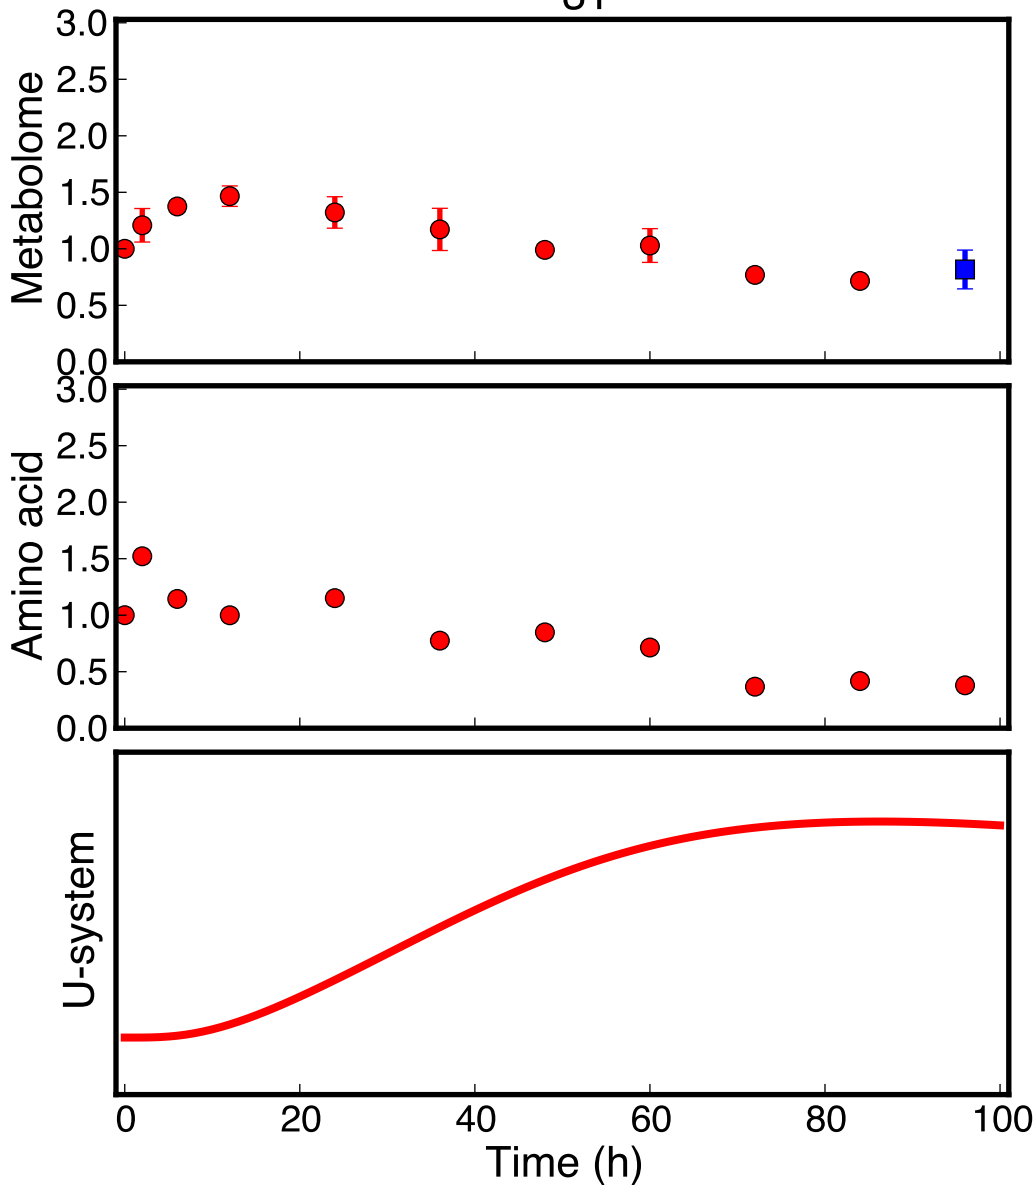

$X_{32}$

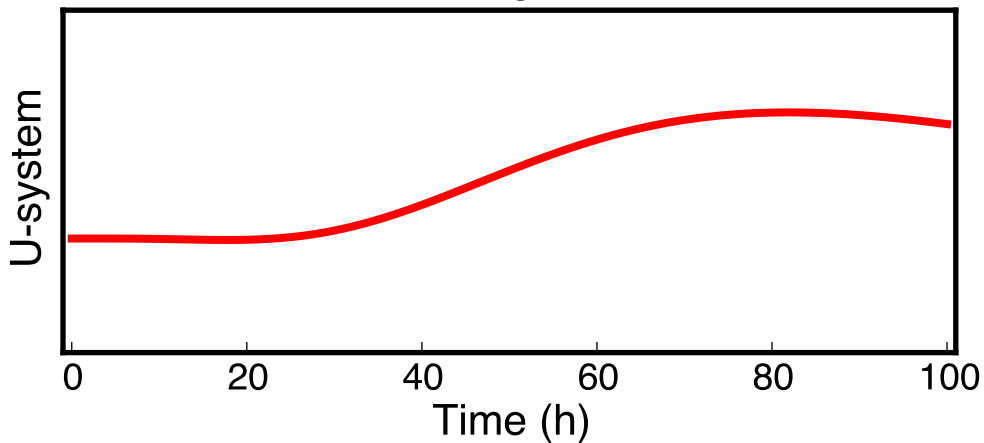



$X_{33}$

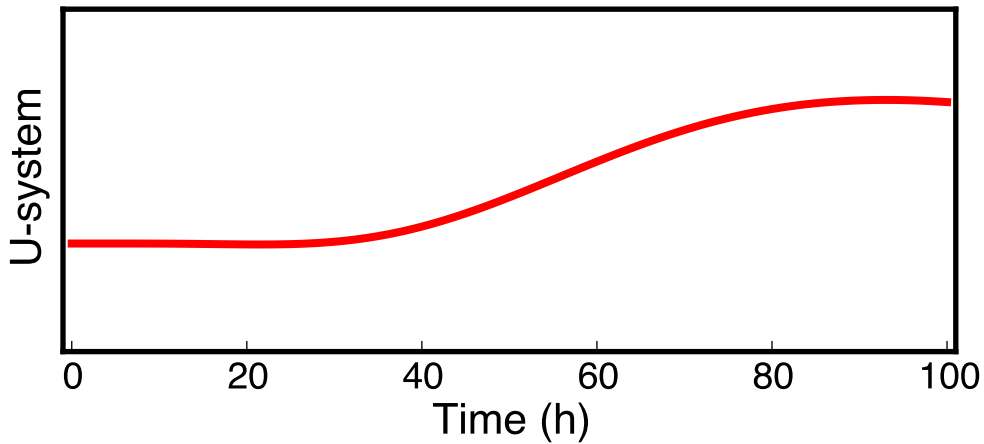

$X_{34}$

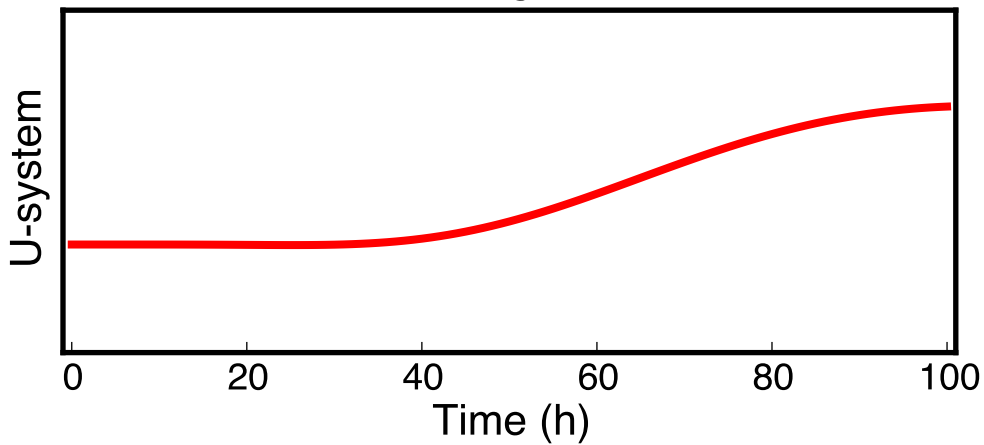

$X_{35}$

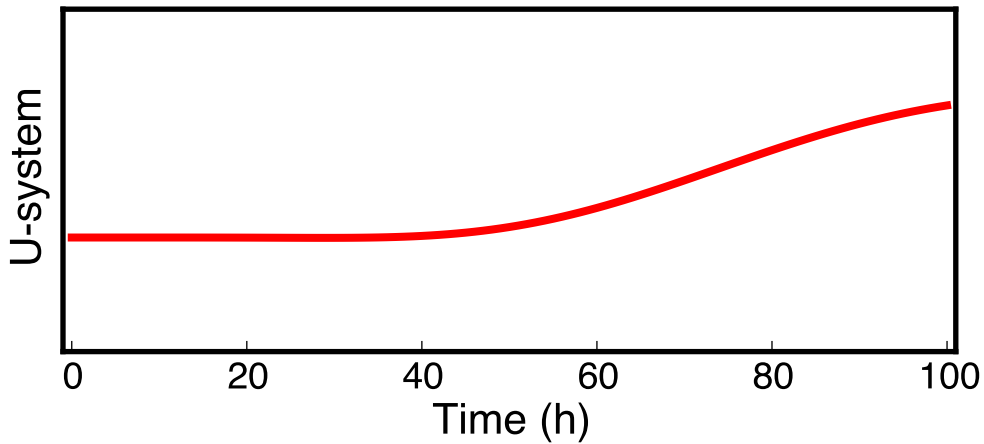

$X_{36}$

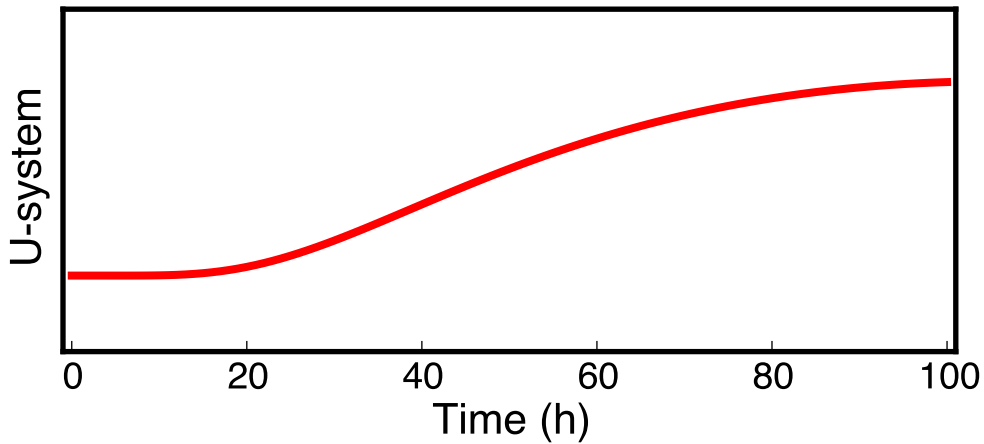

$X_{37}$

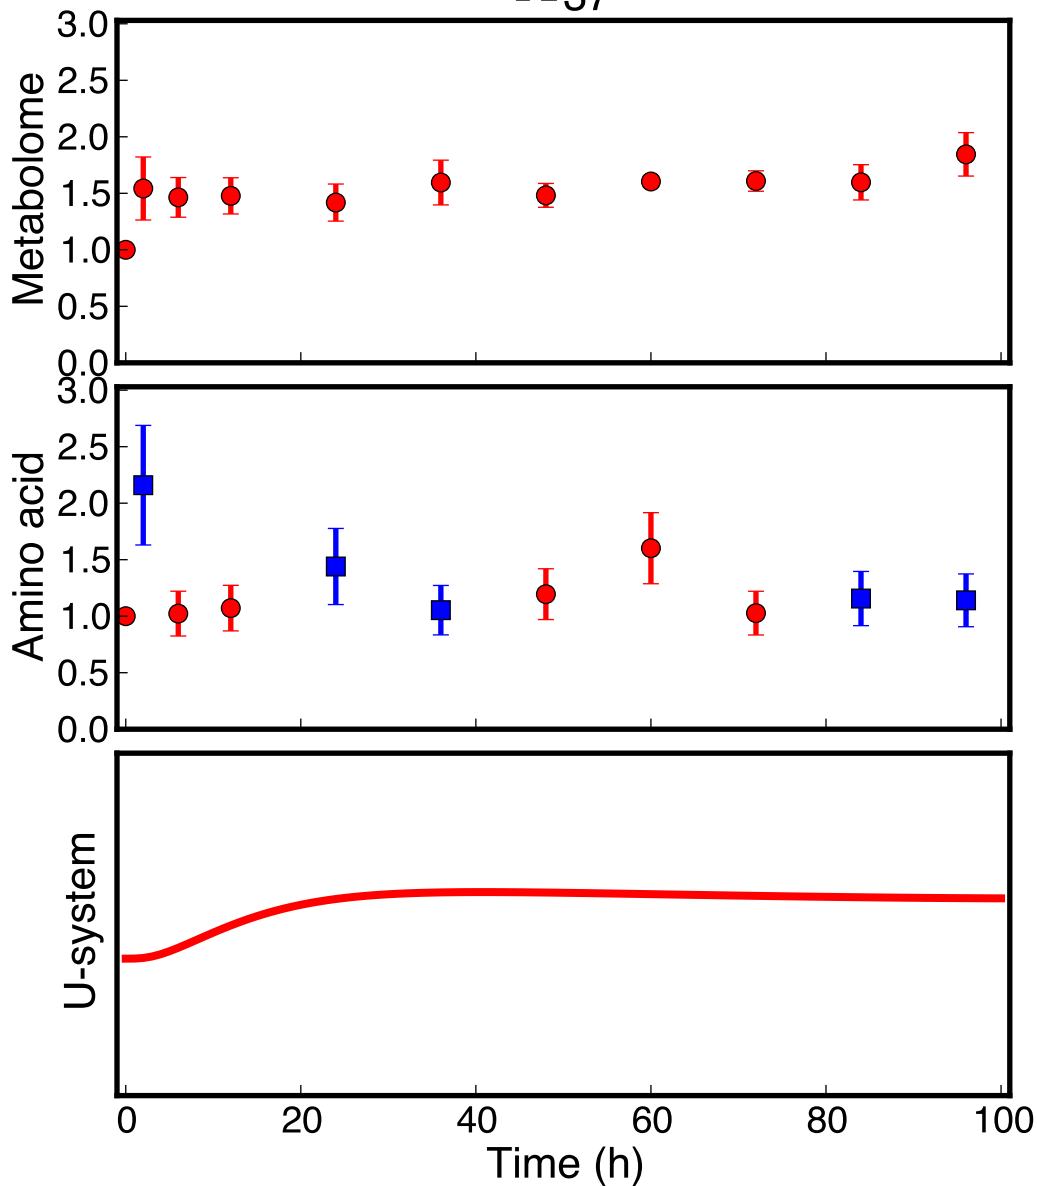

$X_{38}$

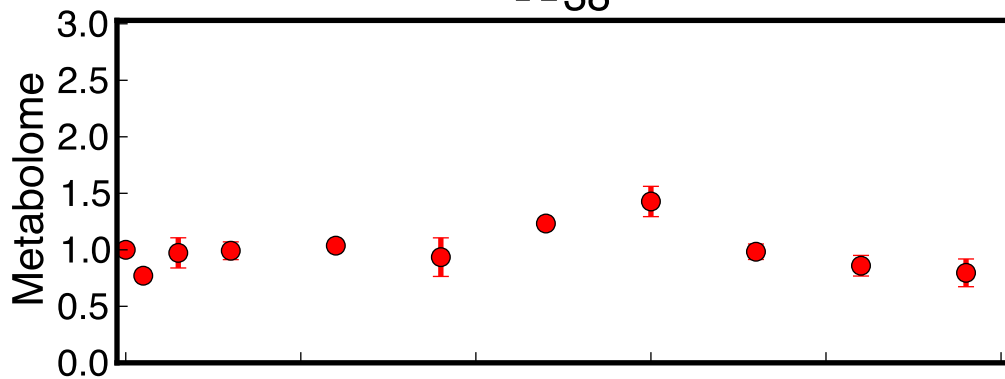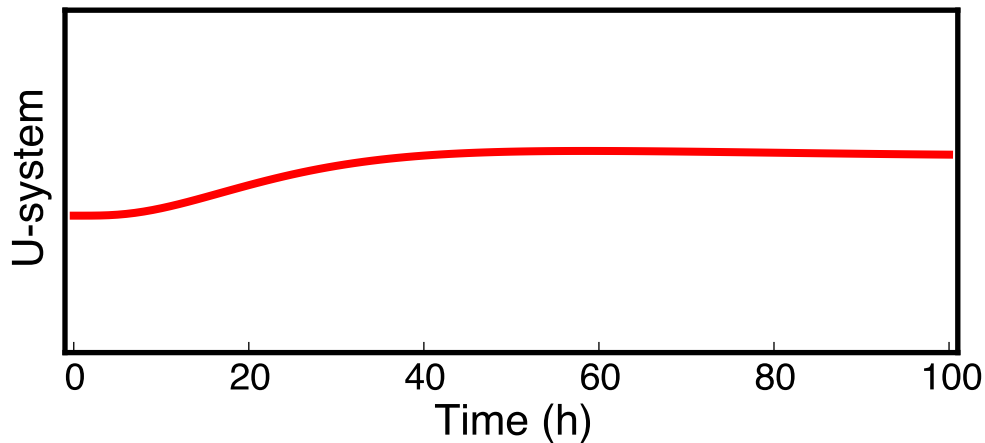

$X_{39}$

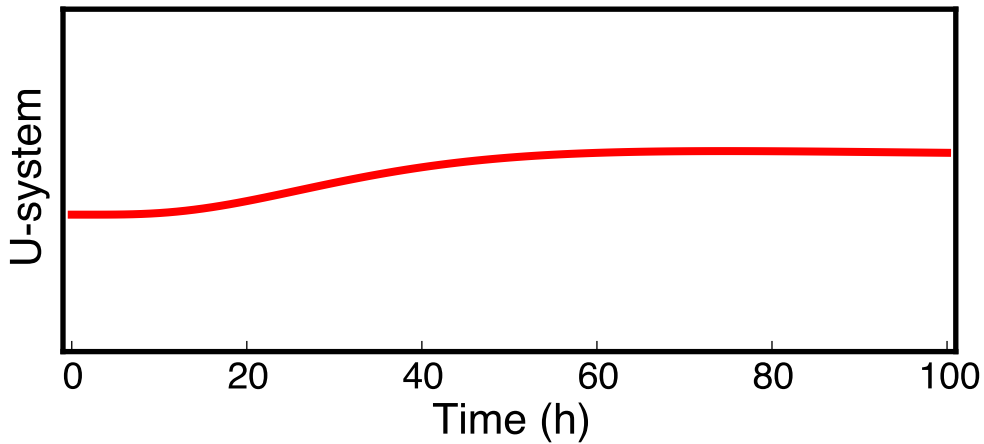

$X_{40}$

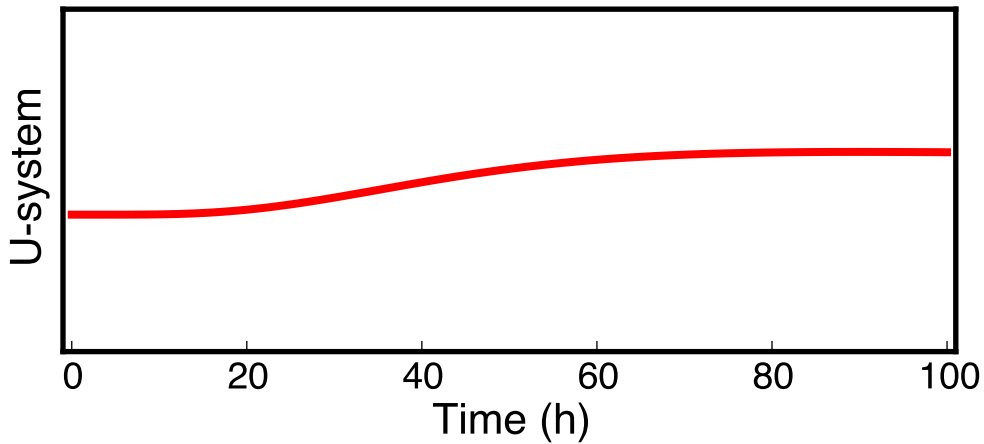



$X_{41}$

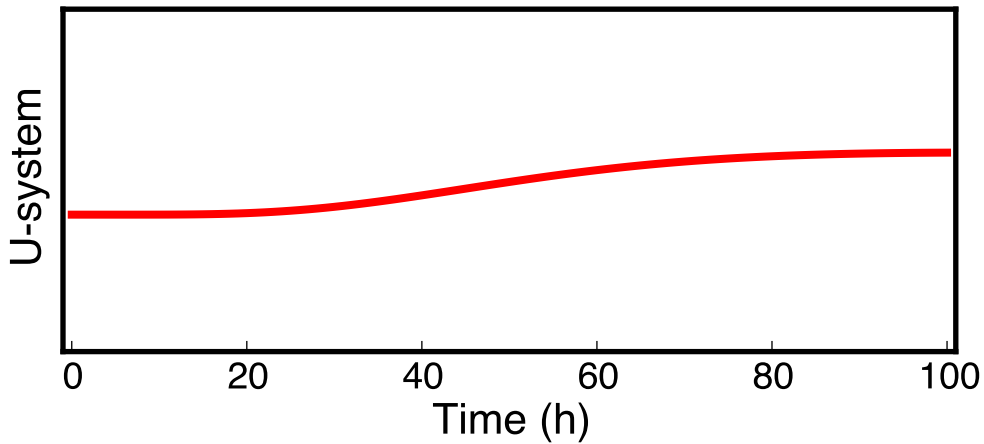

$X_{42}$

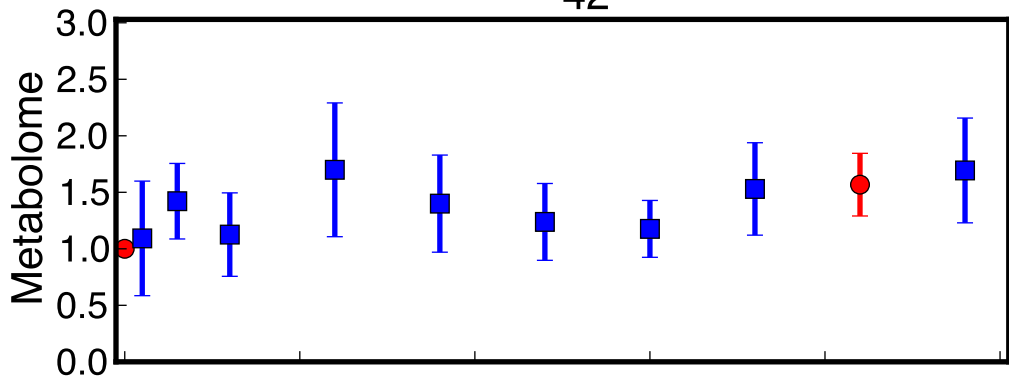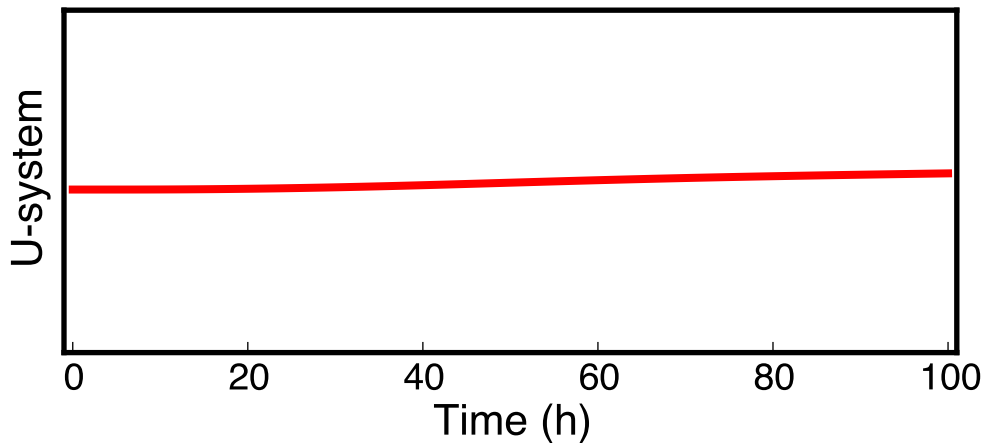

$X_{43}$

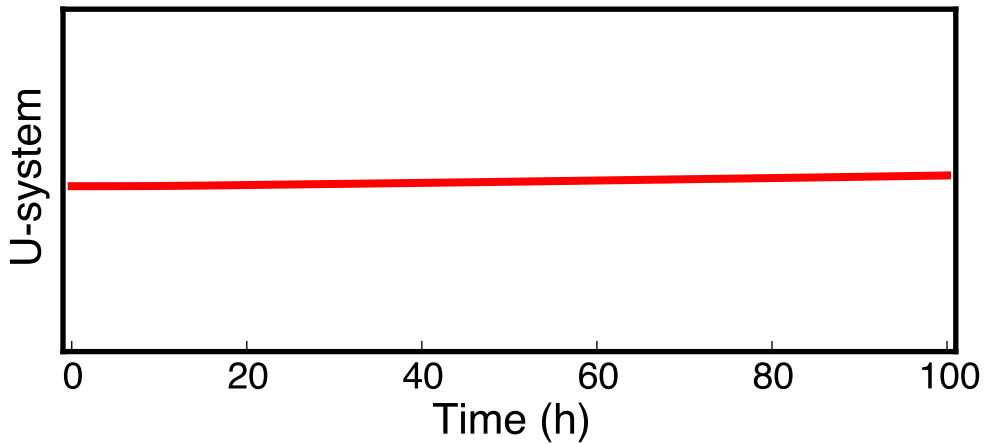

$X_{44}$ 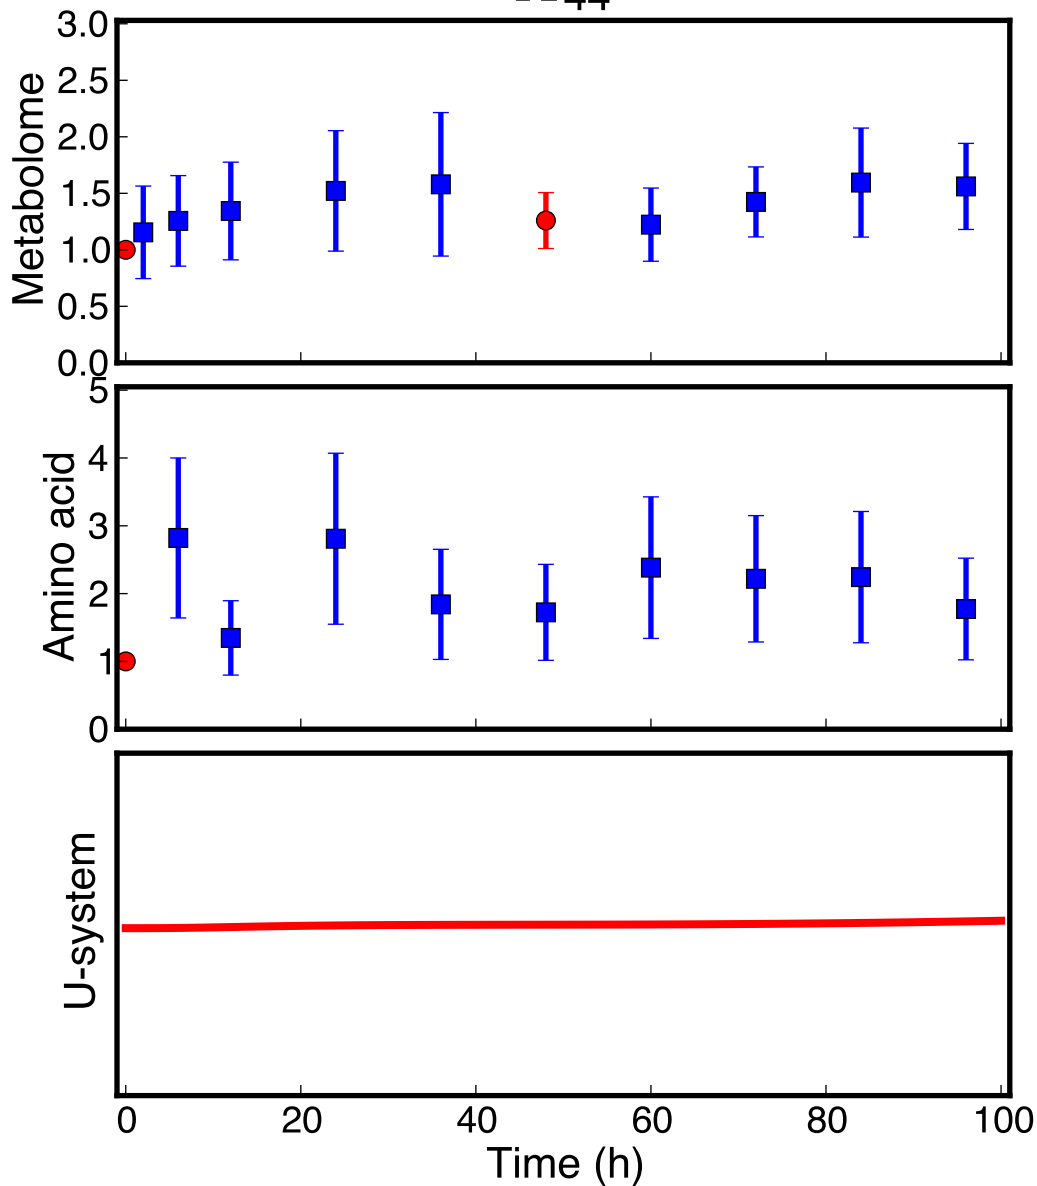

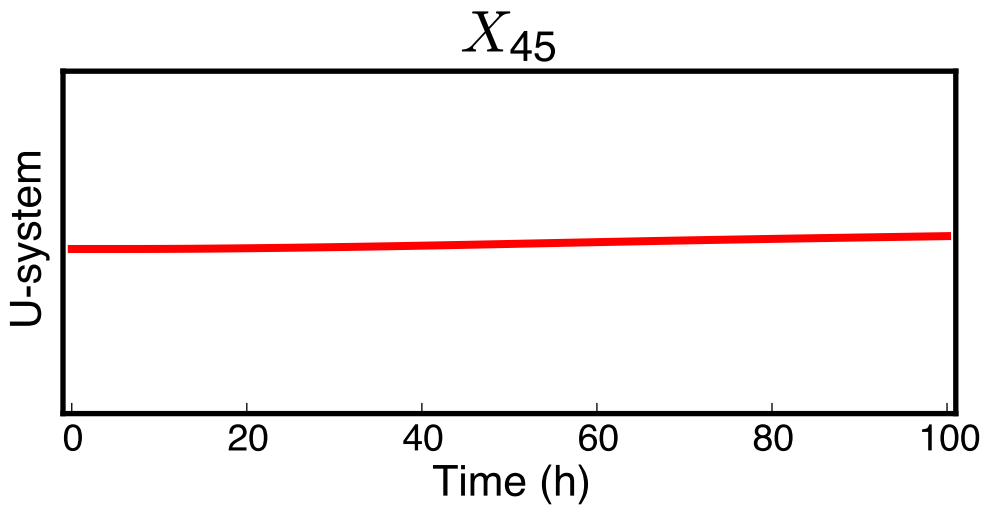

$X_{46}$

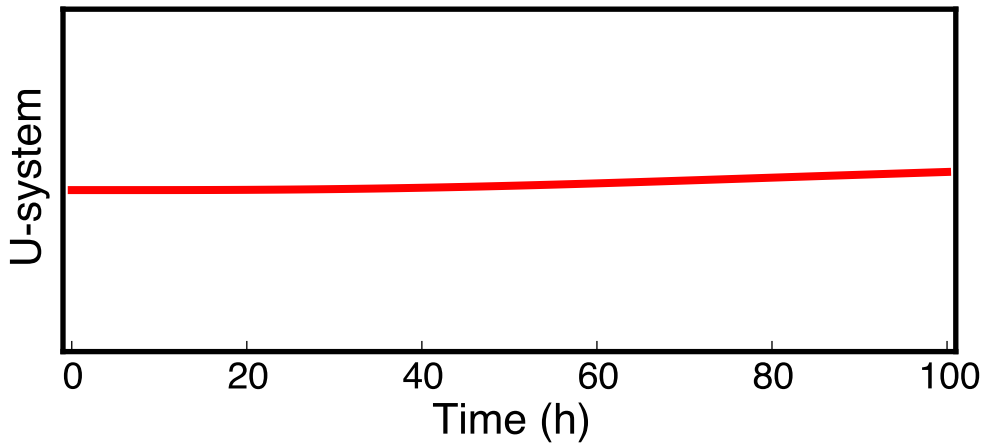

$X_{47}$

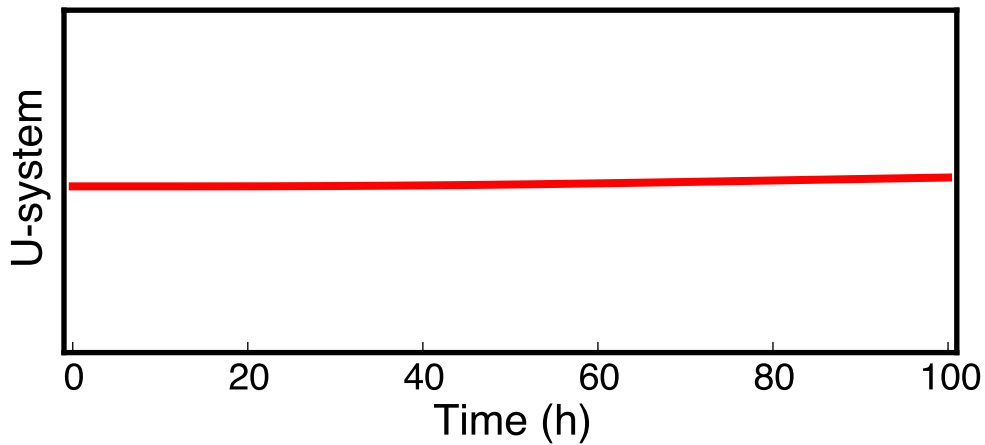

$X_{48}$

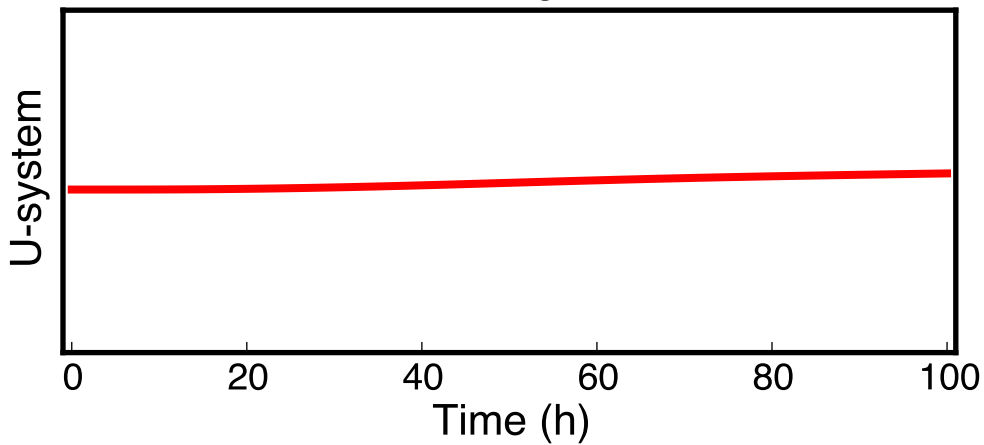



$X_{49}$

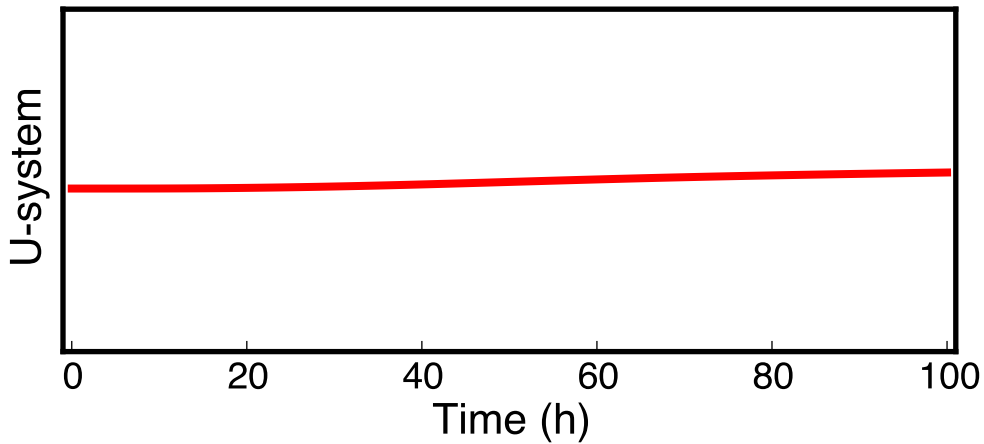

$X_{50}$

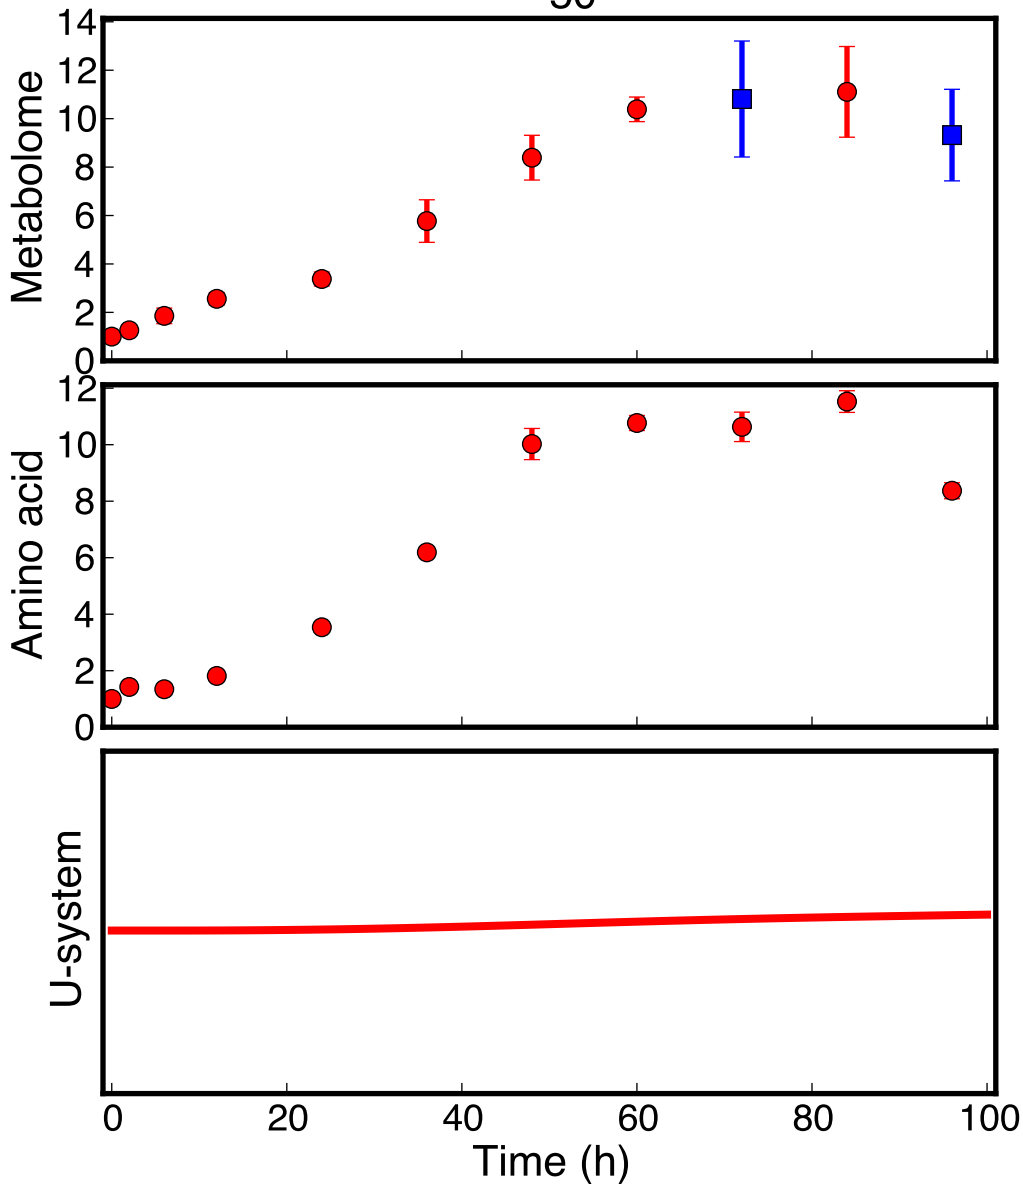

$X_{51}$

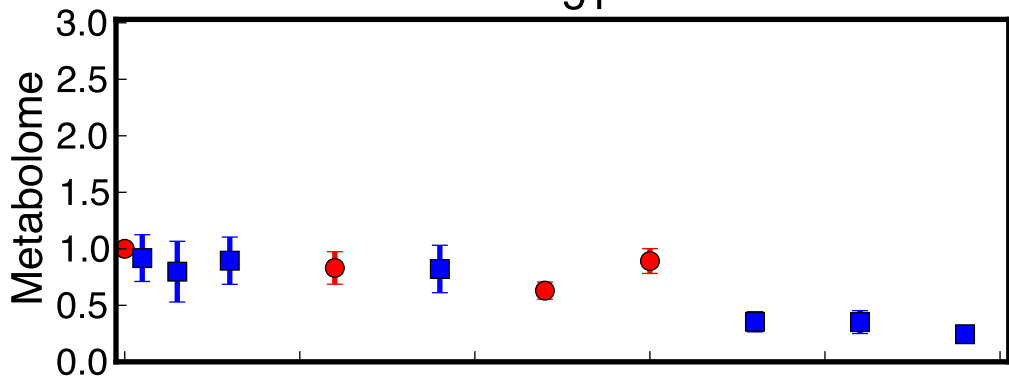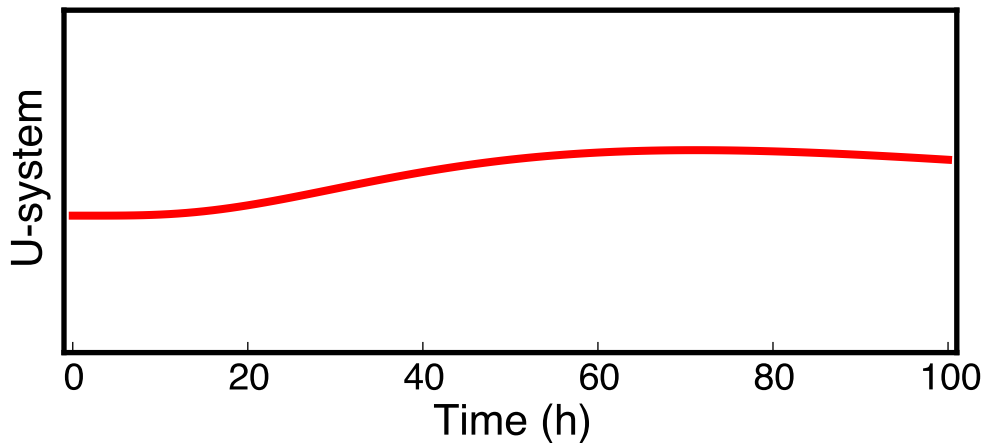

$X_{52}$

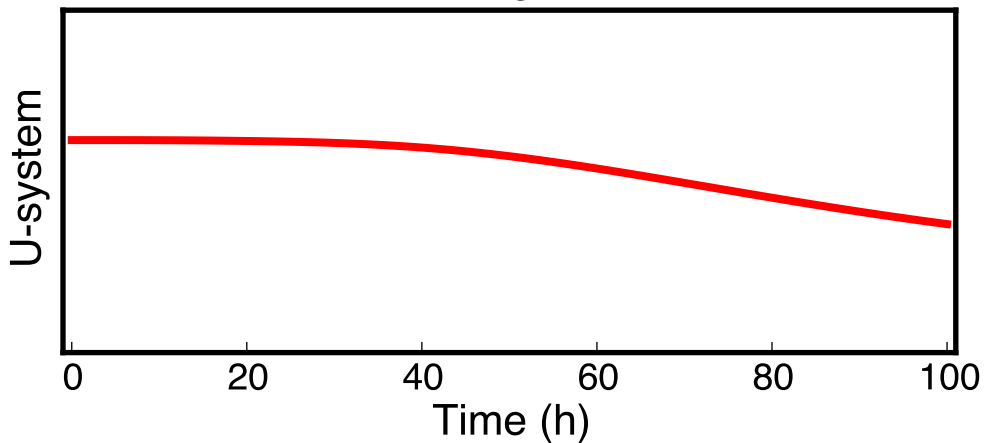

$X_{53}$

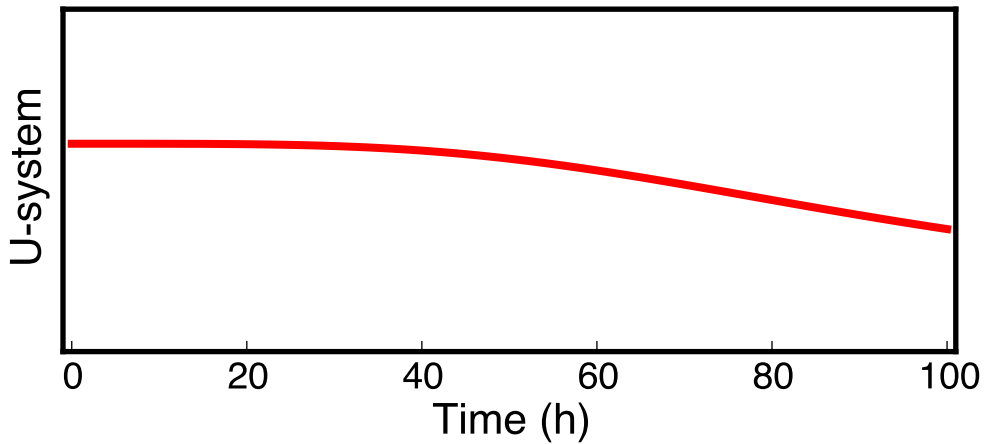

$X_{54}$

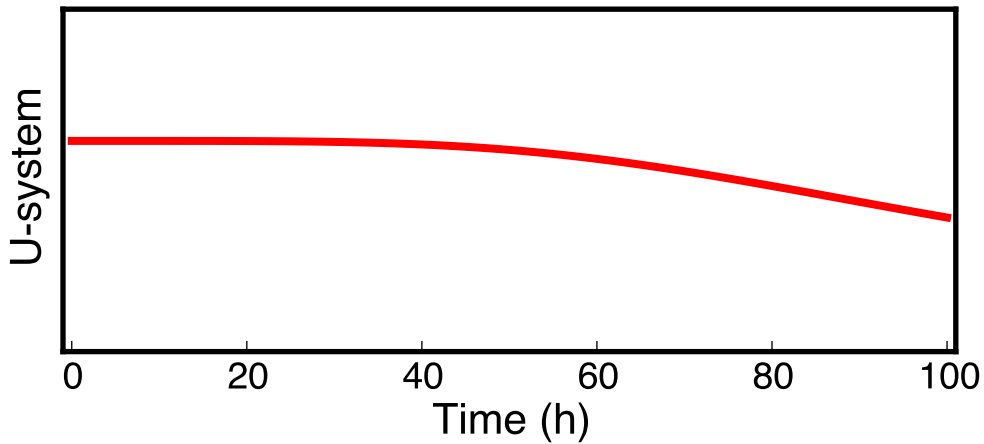

$X_{55}$

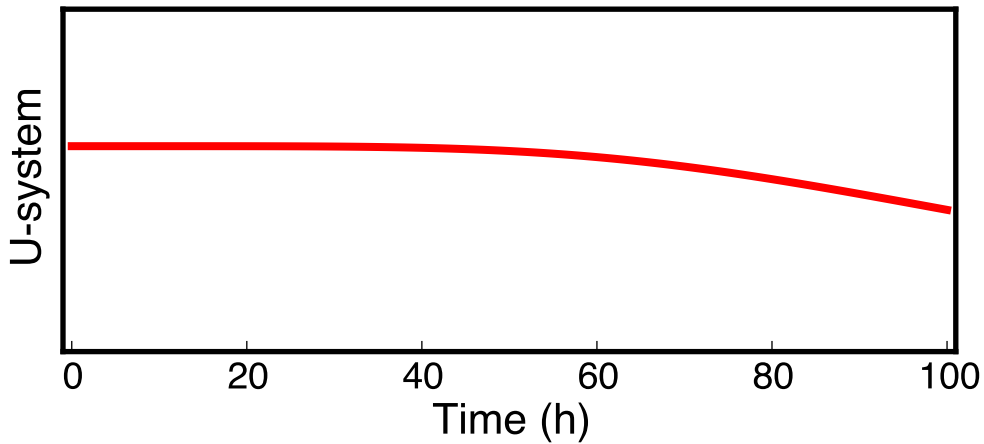

$X_{56}$

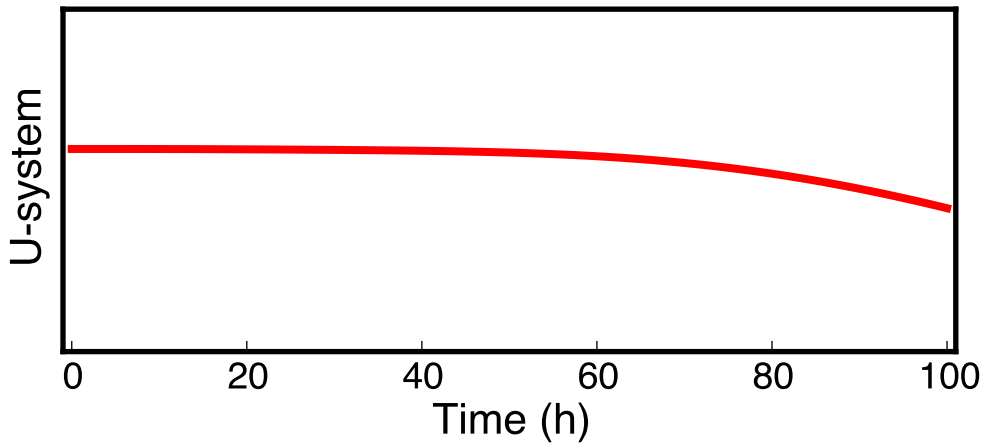



$X_{57}$

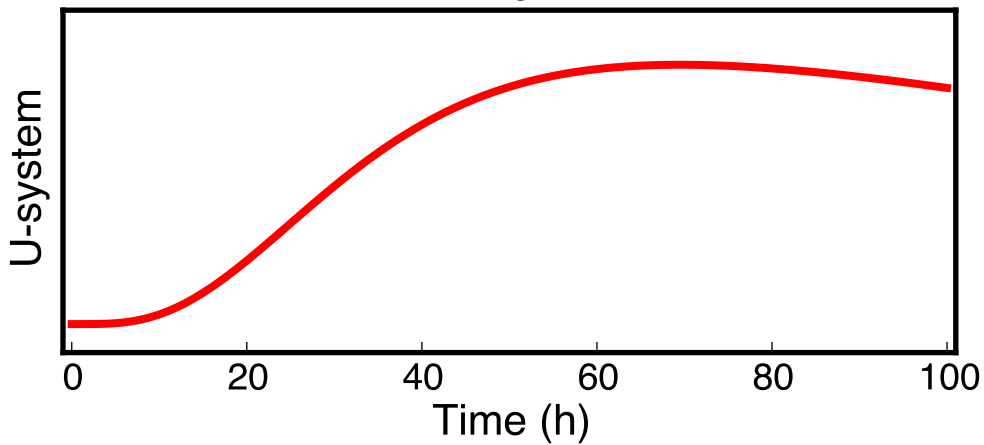

$X_{58}$

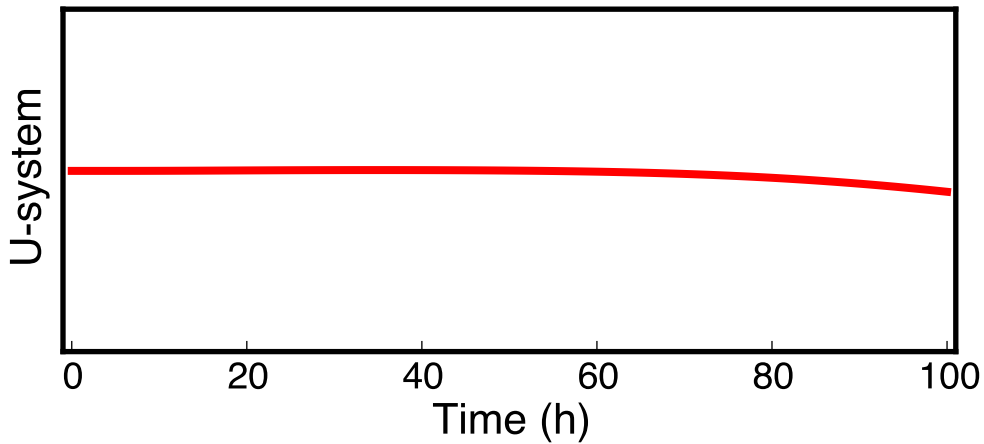

$X_{59}$

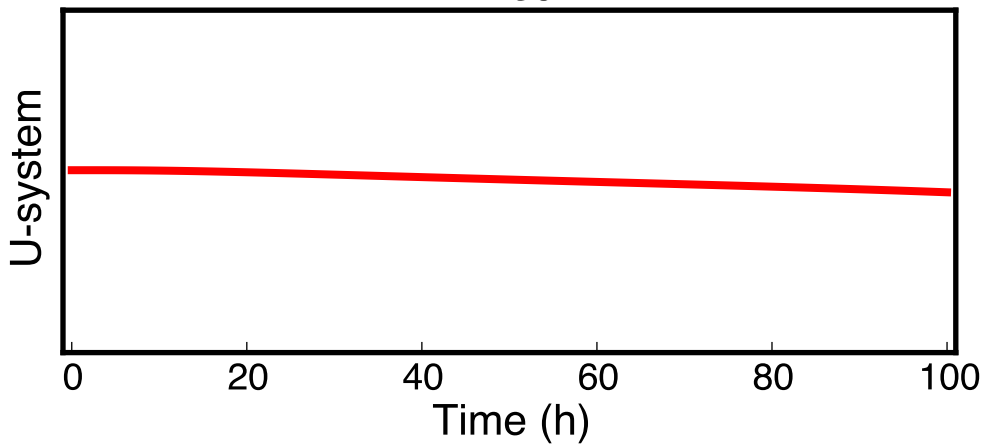

$X_{60}$

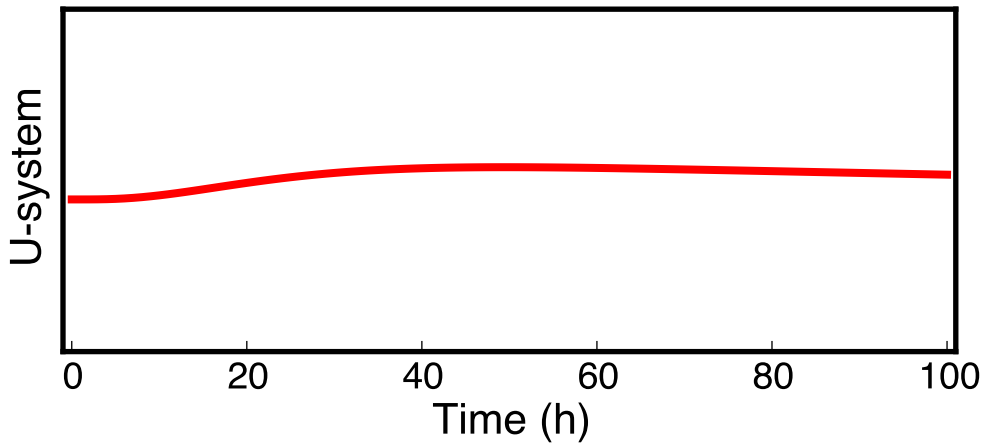

$X_{61}$

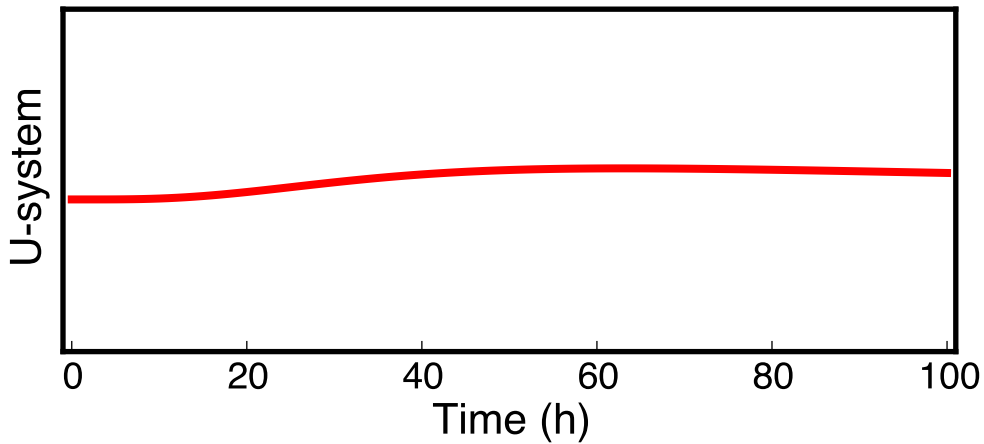

$X_{62}$

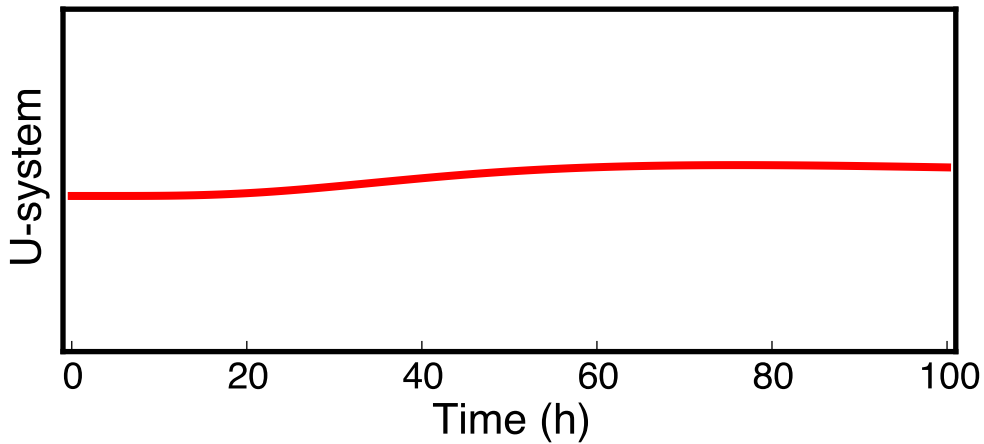

$X_{63}$

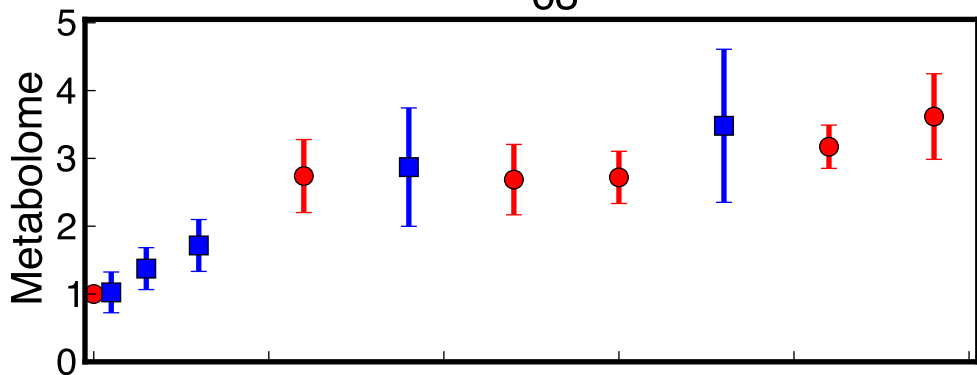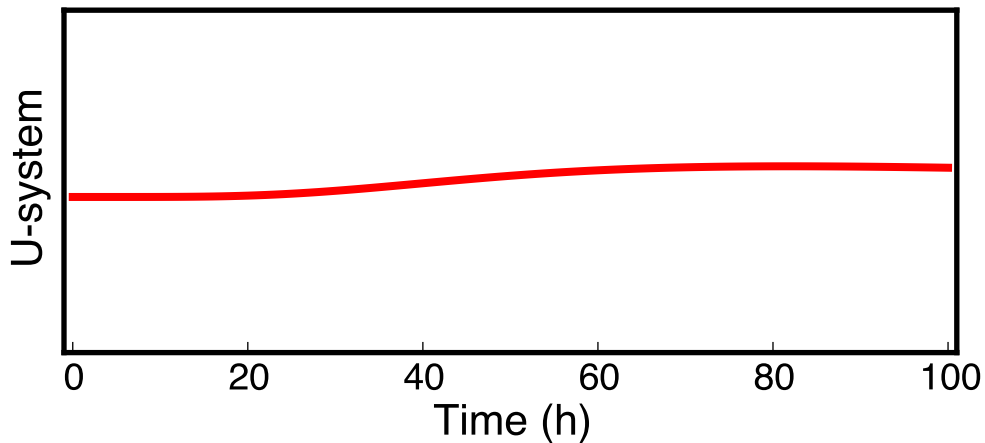

$X_{64}$

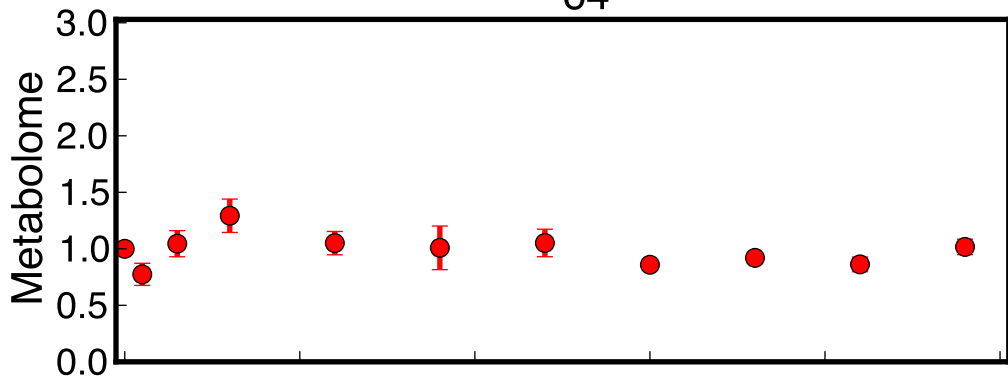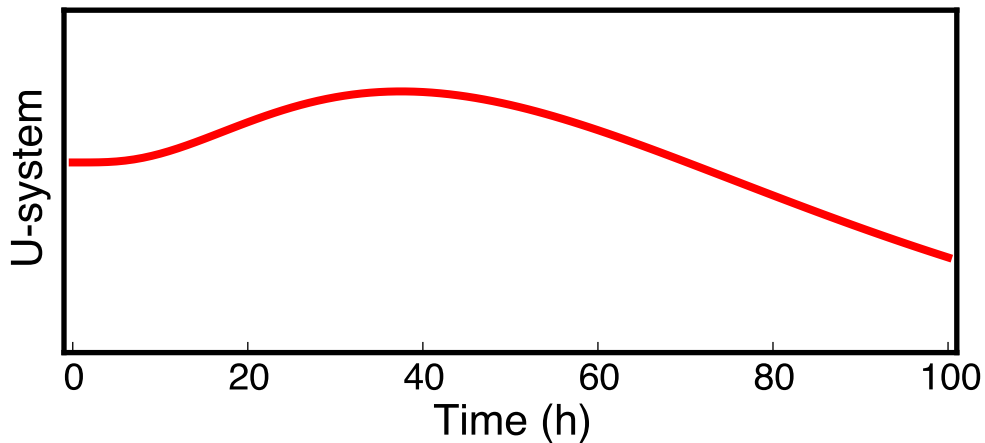



$X_{65}$

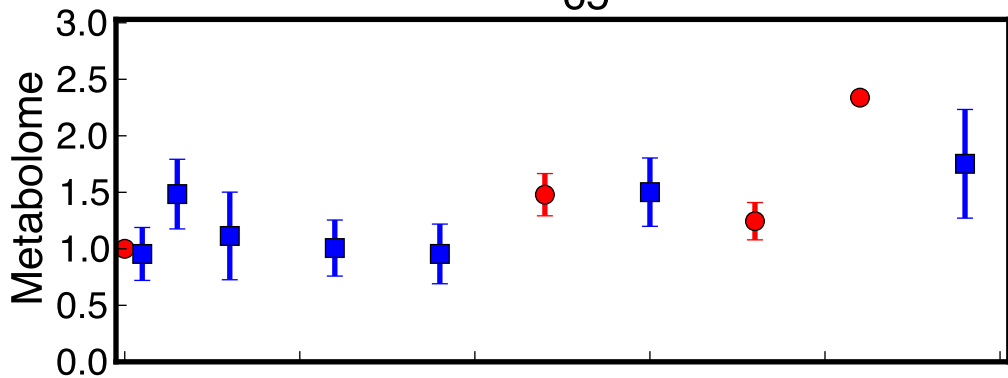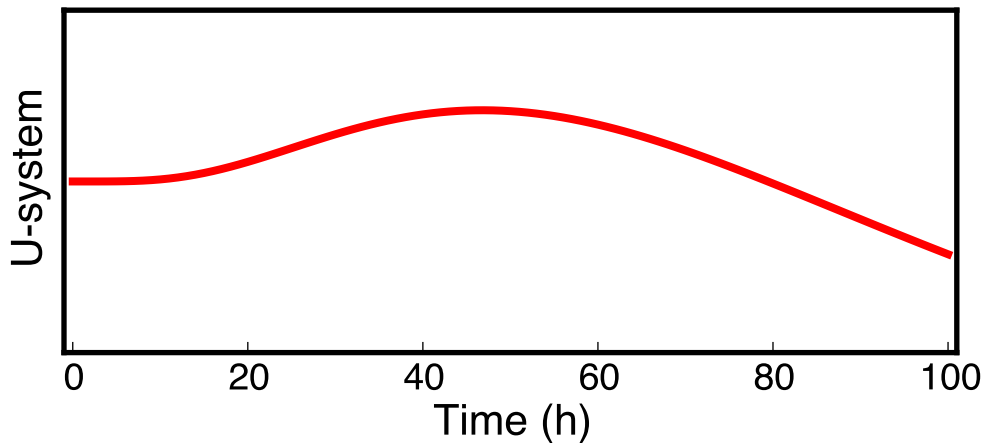

$X_{66}$

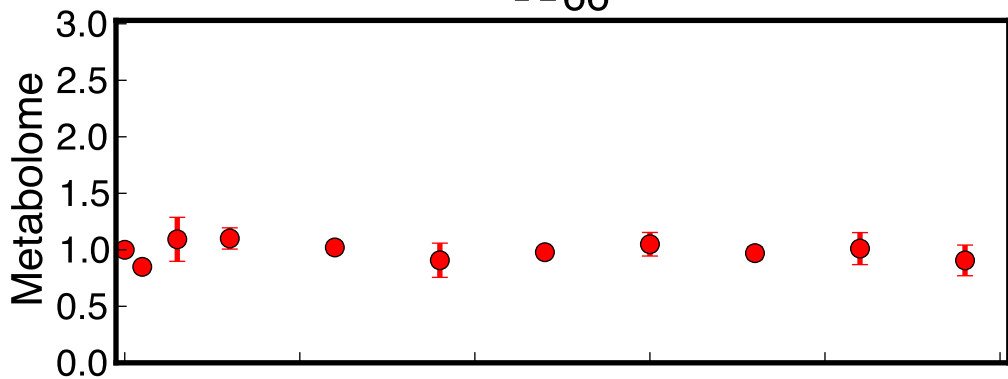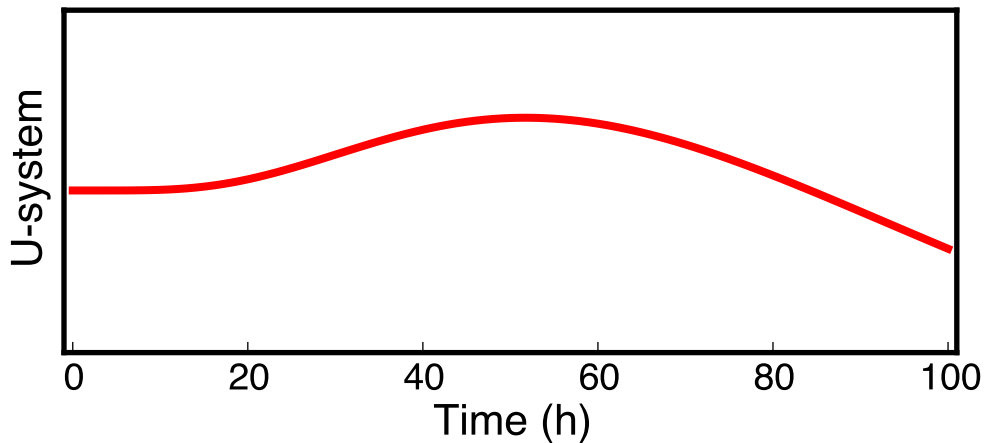

$X_{67}$

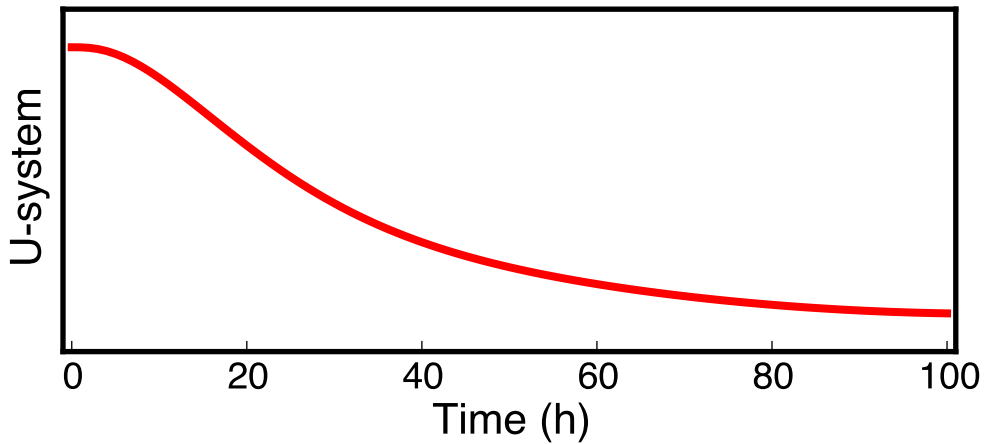

$X_{68}$

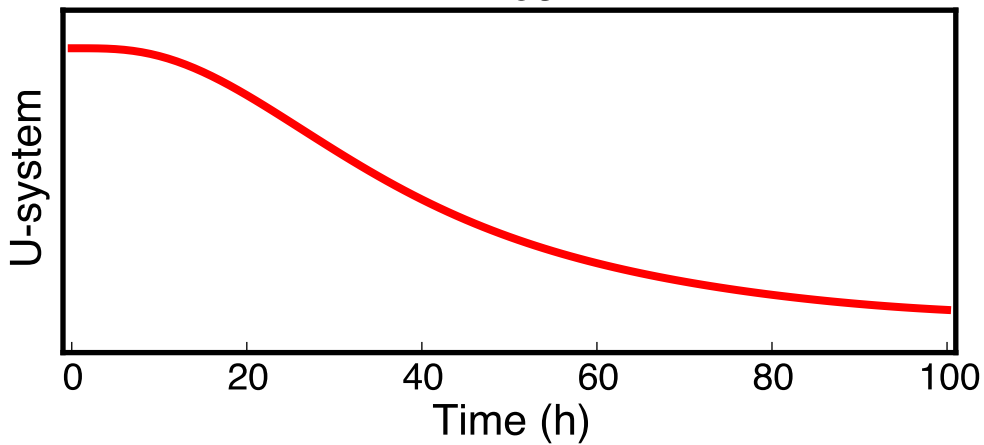

$X_{69}$

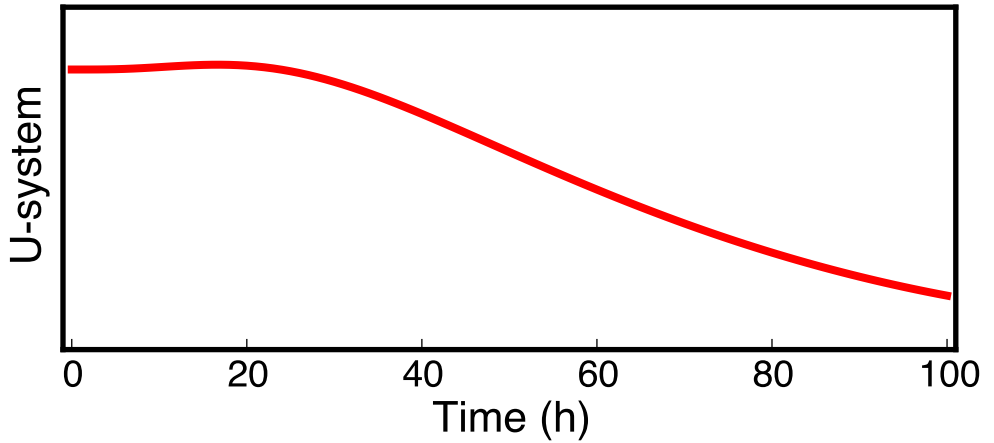

$X_{70}$

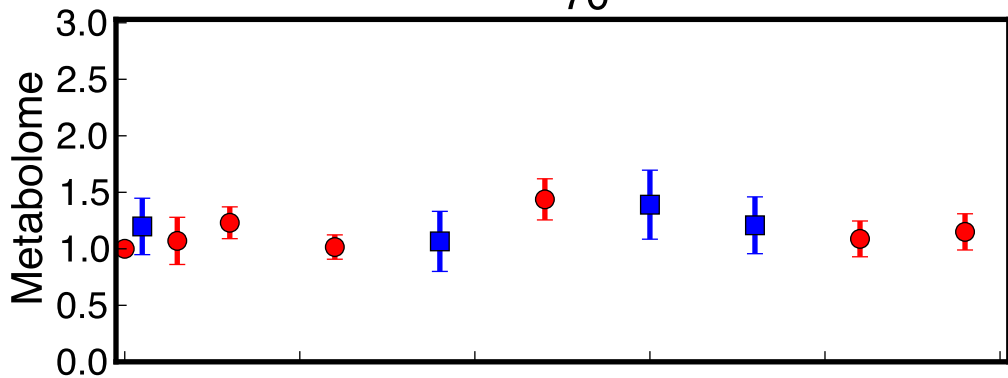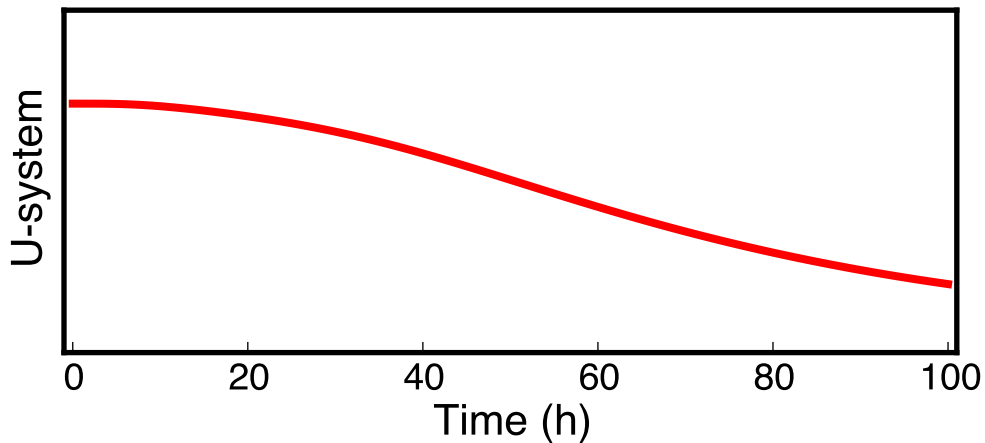

$X_{71}$

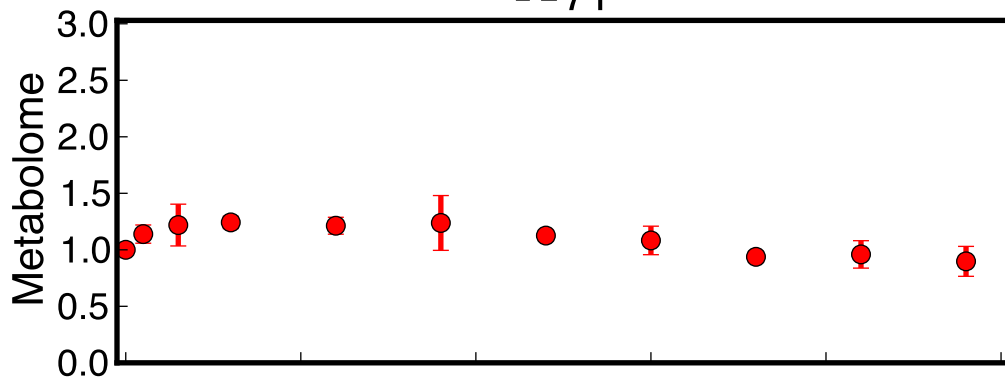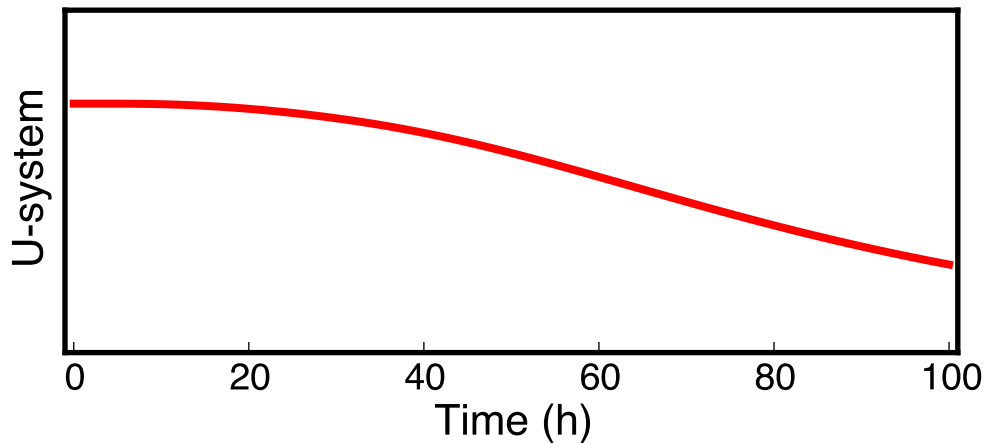

$X_{72}$

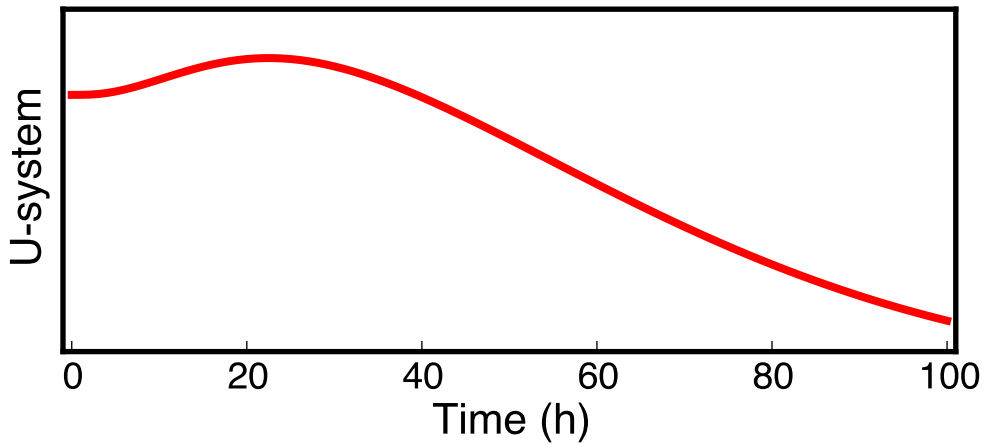



$X_{73}$

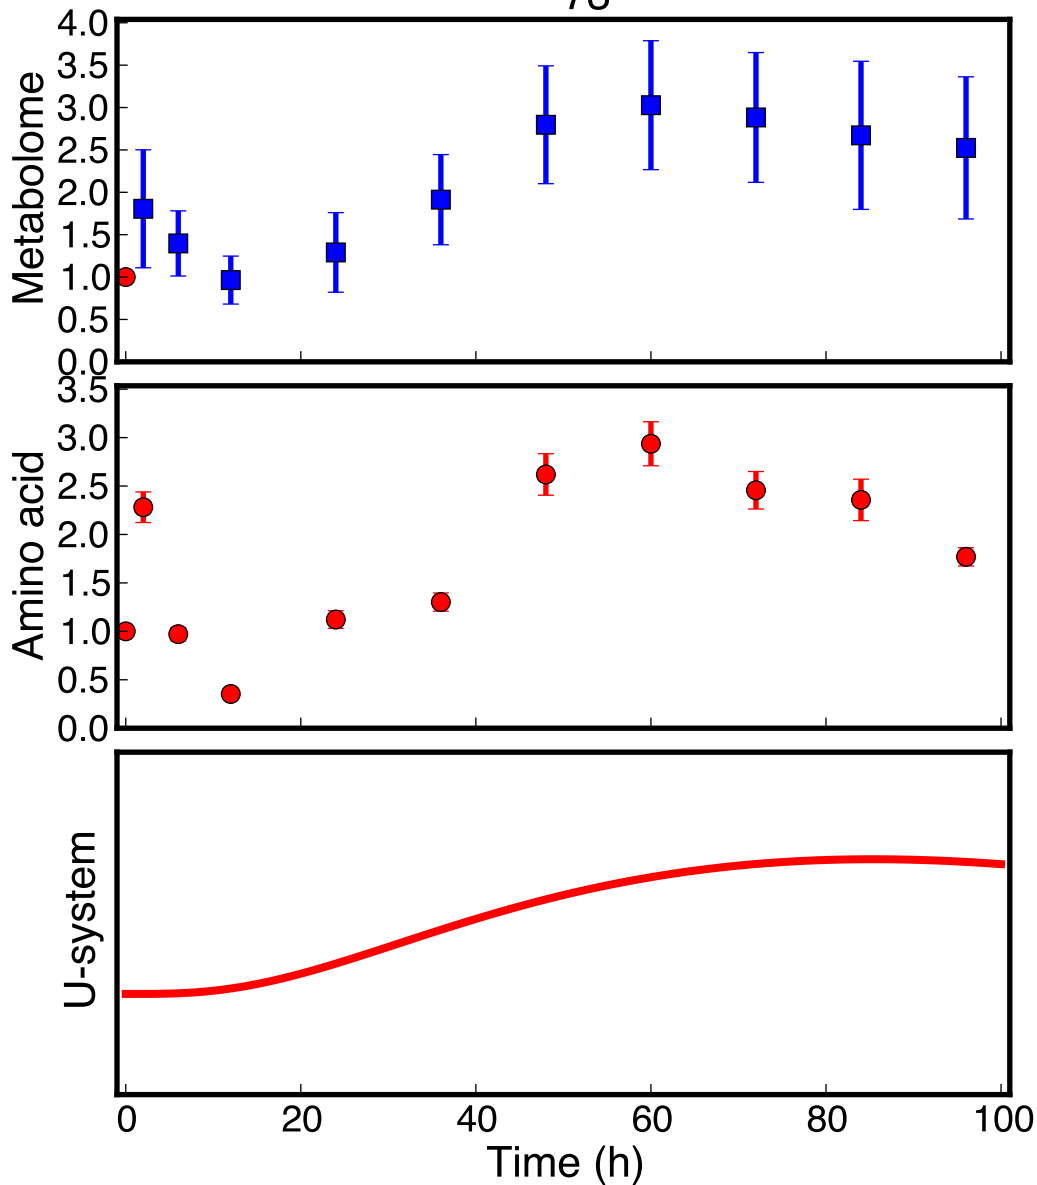

$X_{74}$

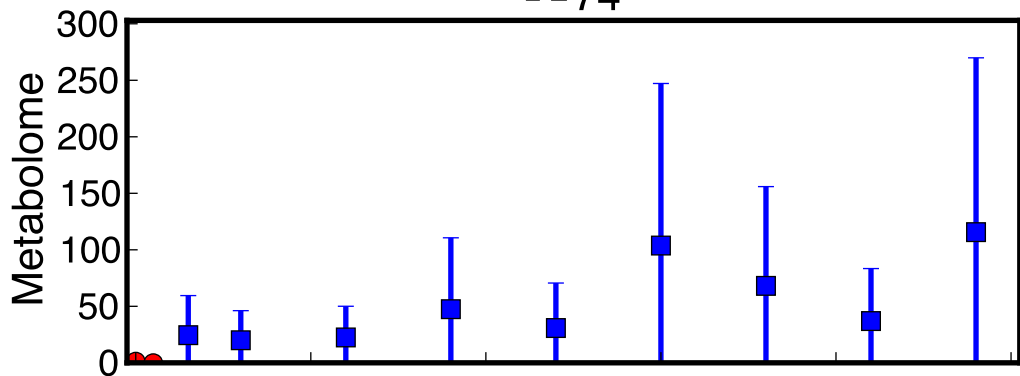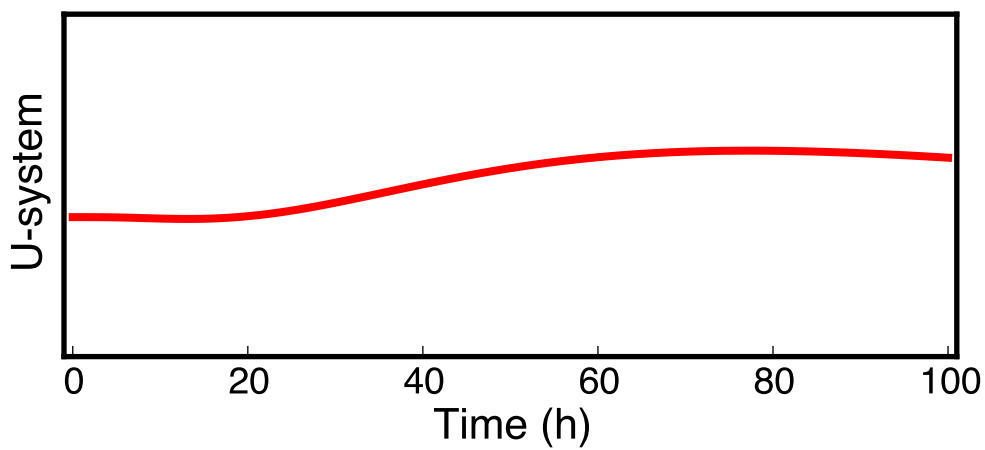

$X_{75}$

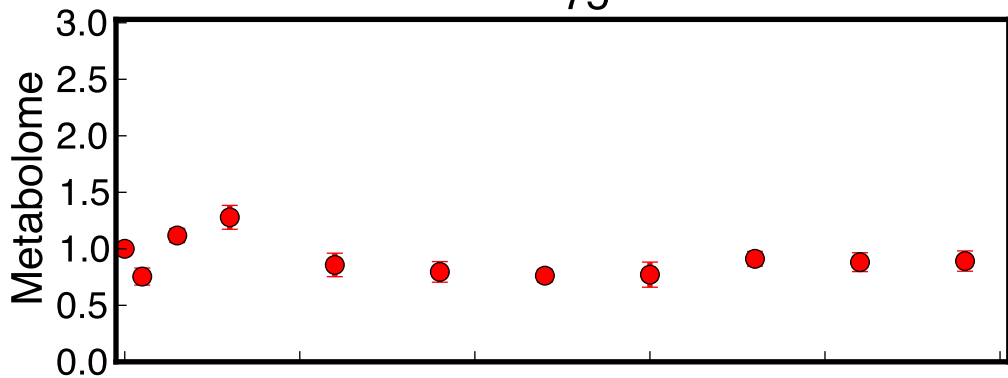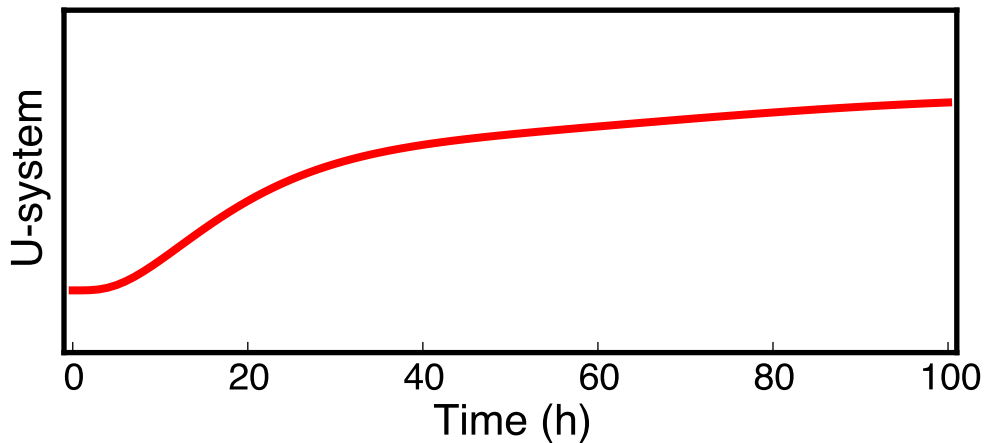

$X_{76}$

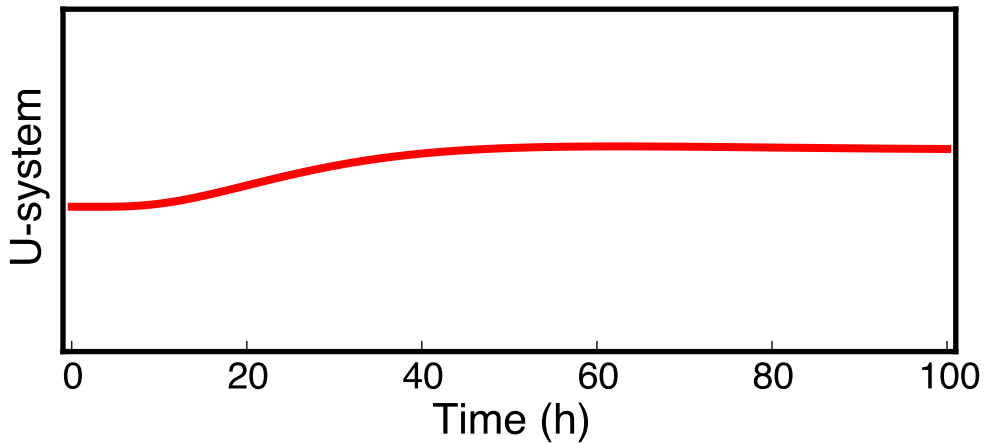

$X_{77}$

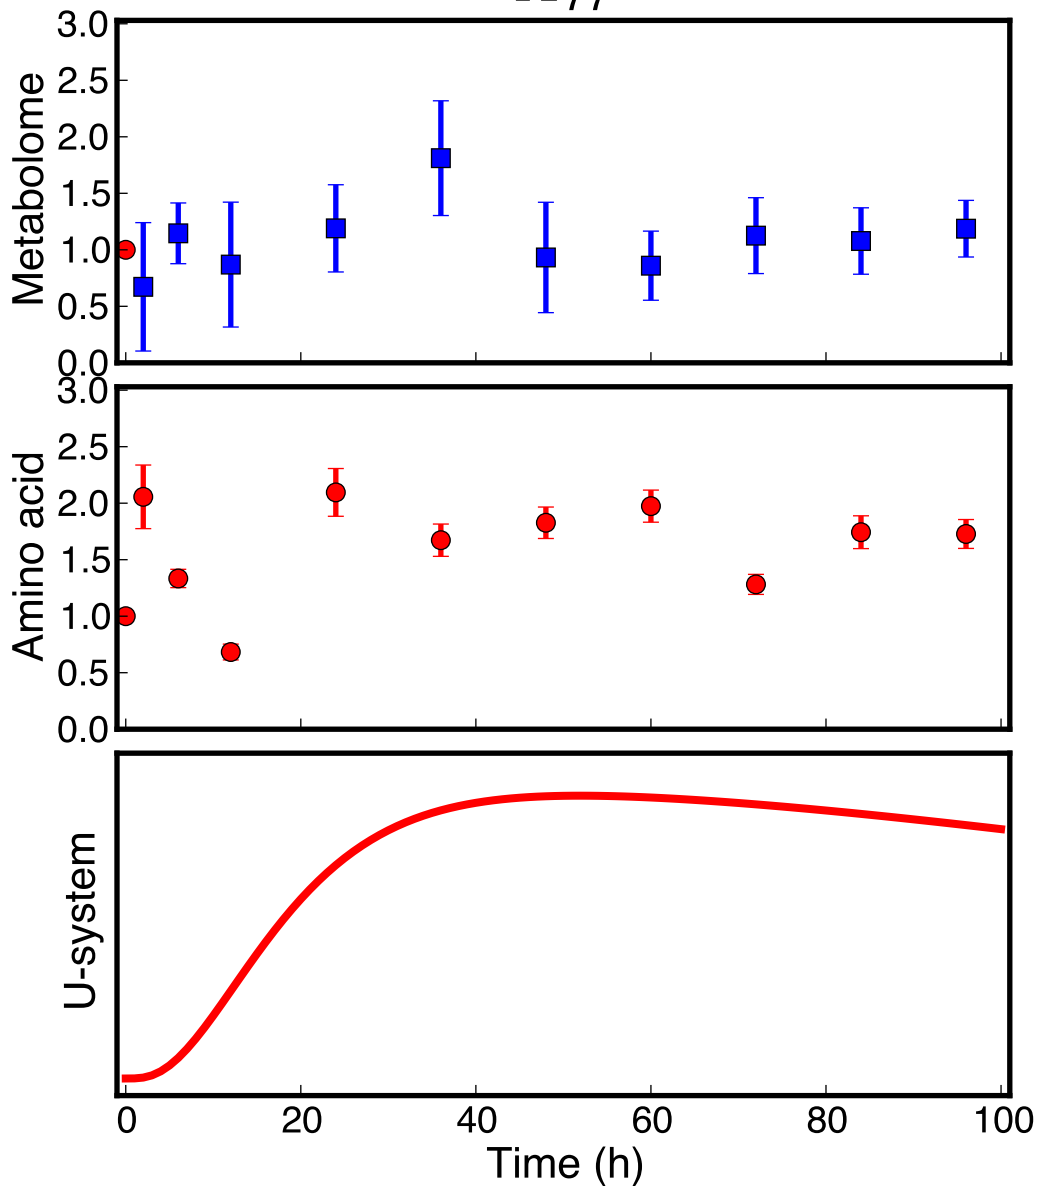

$X_{78}$

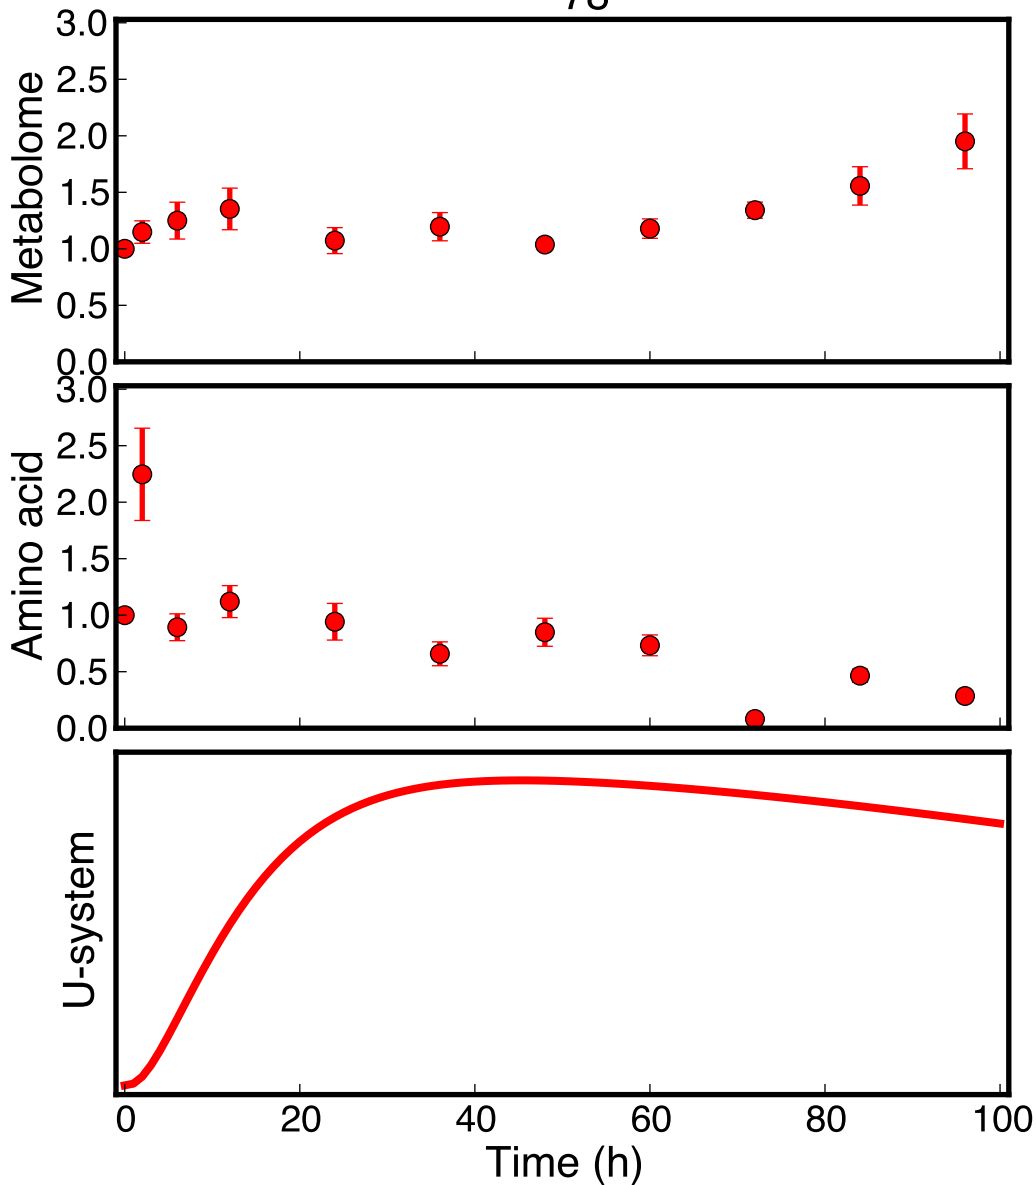

$X_{79}$

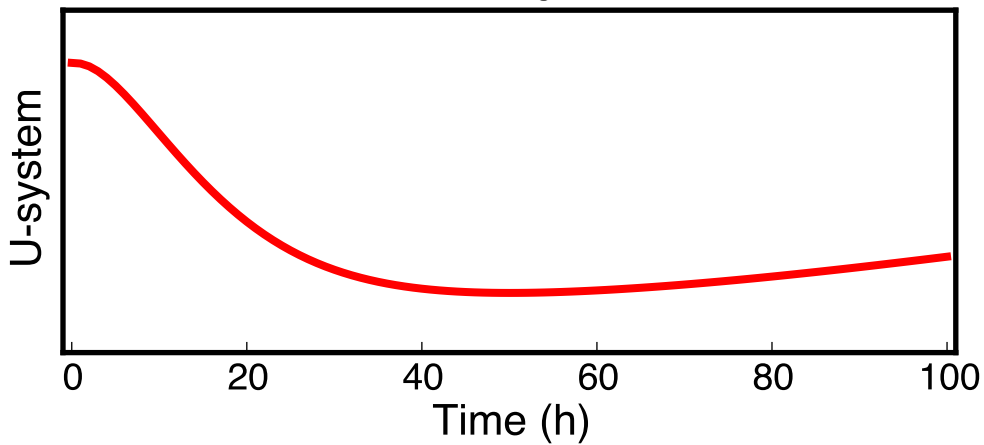

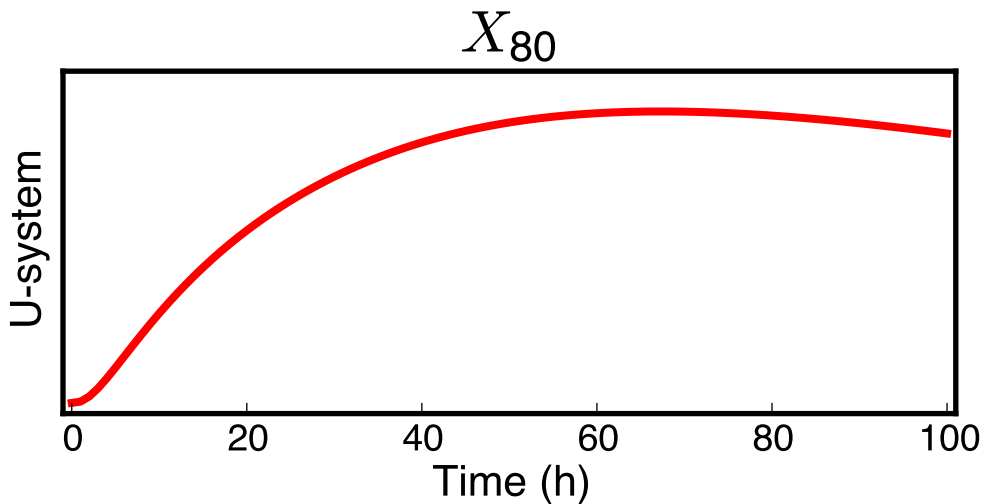



$X_{81}$

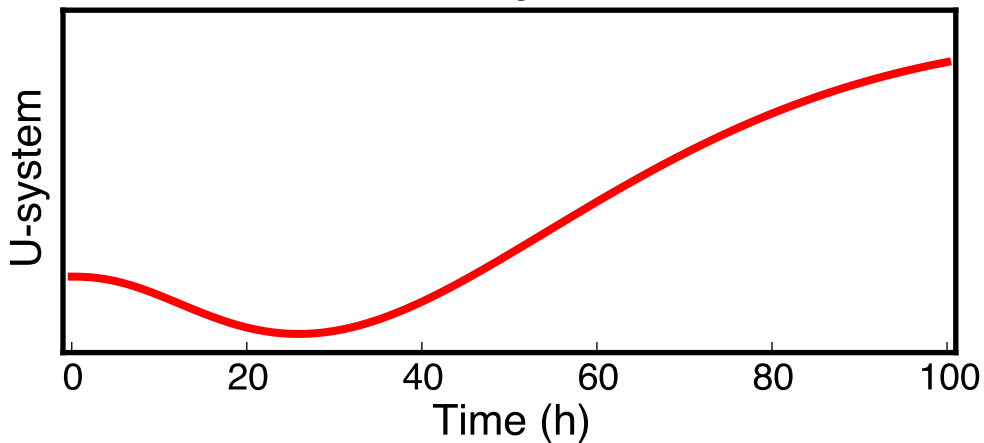

$X_{82}$

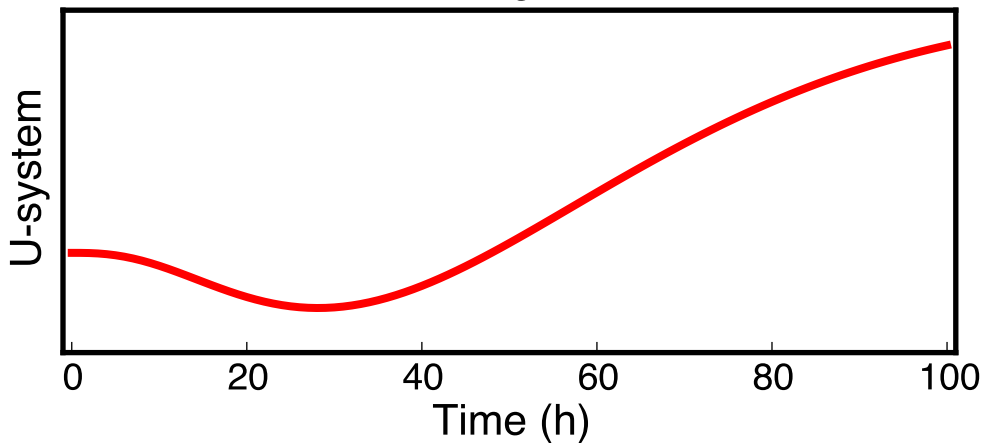

$X_{83}$

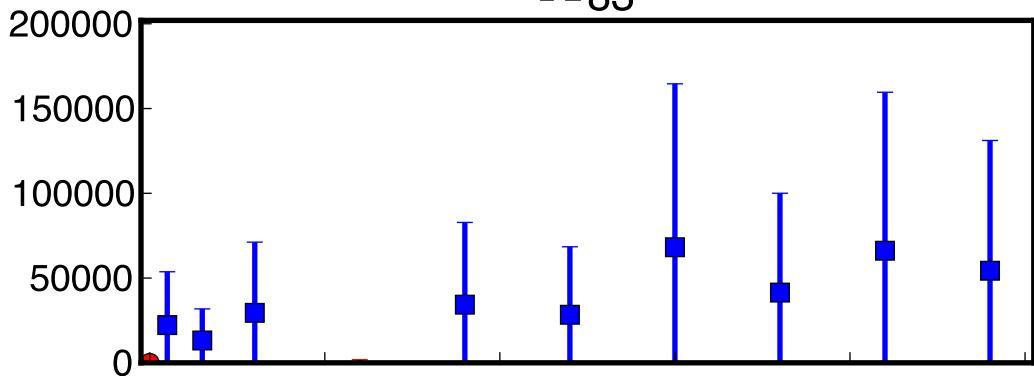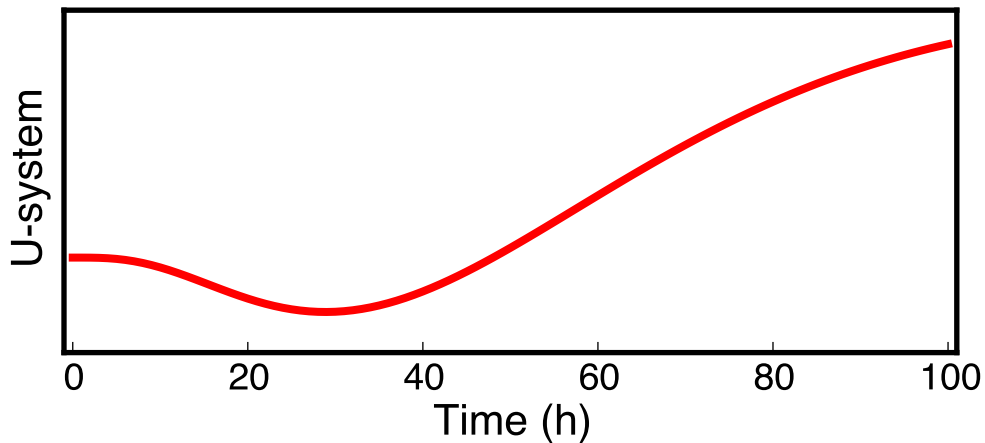

$X_{84}$

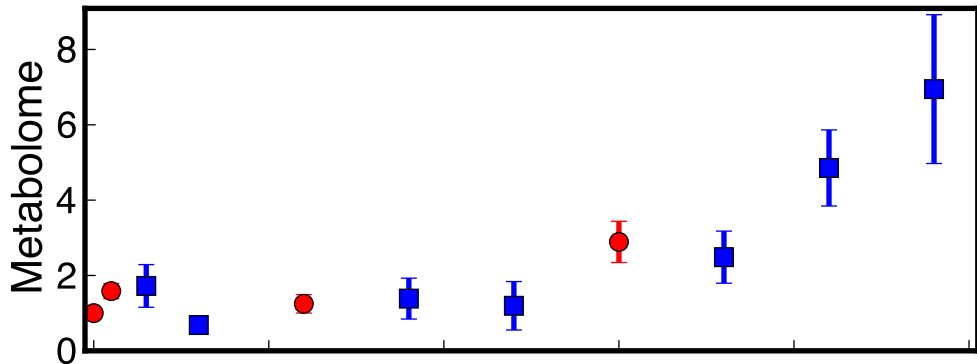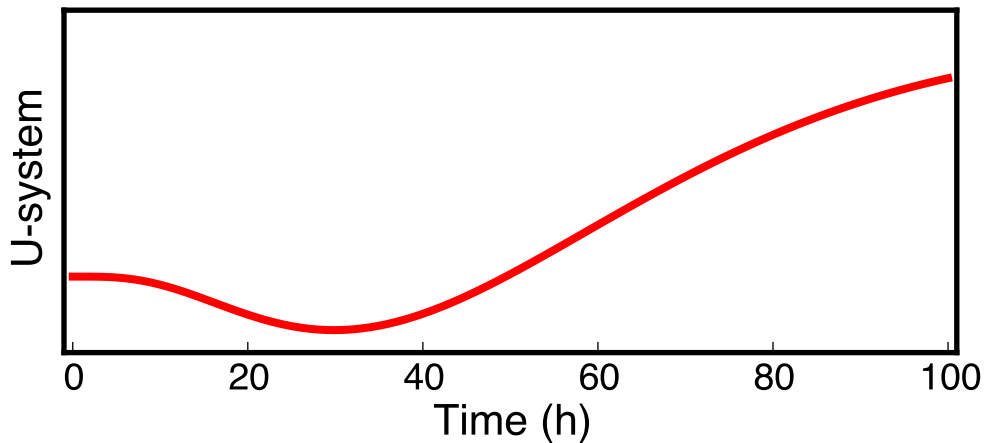

$X_{85}$

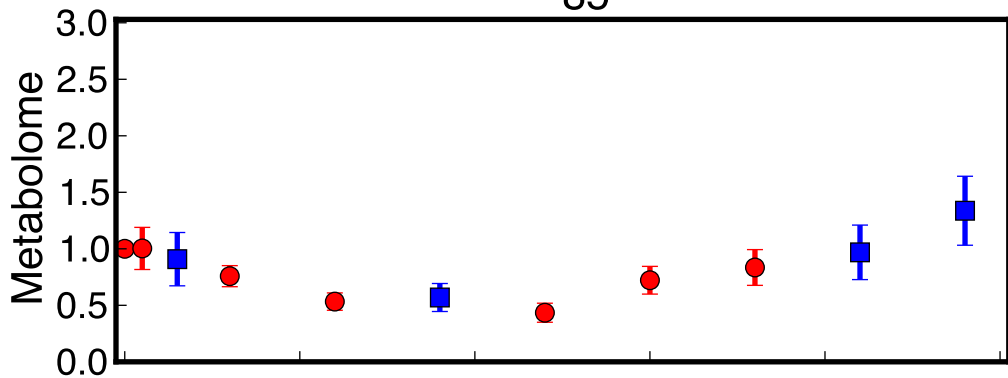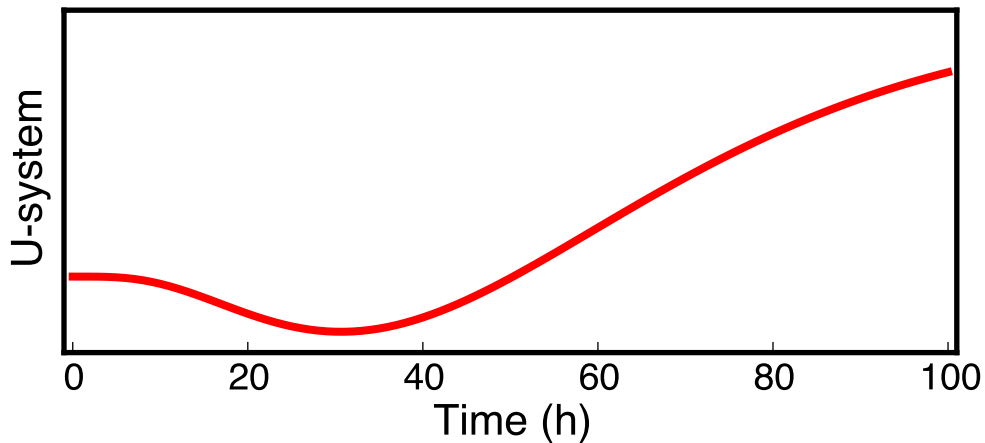

$X_{86}$

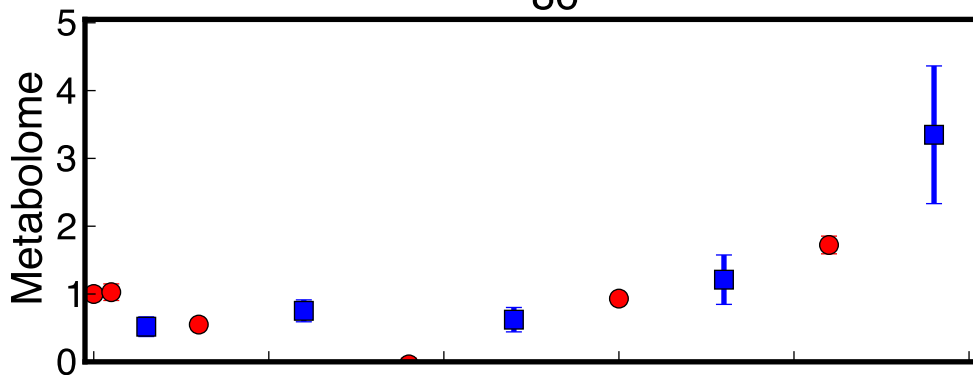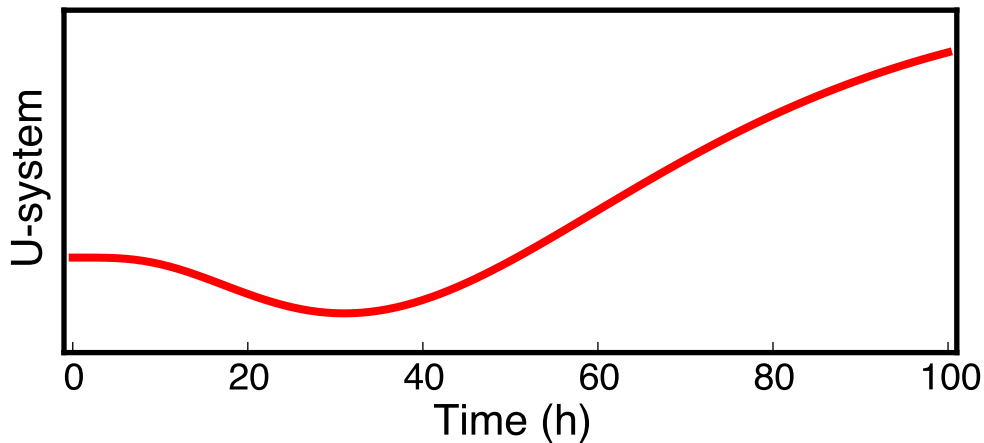

$X_{87}$

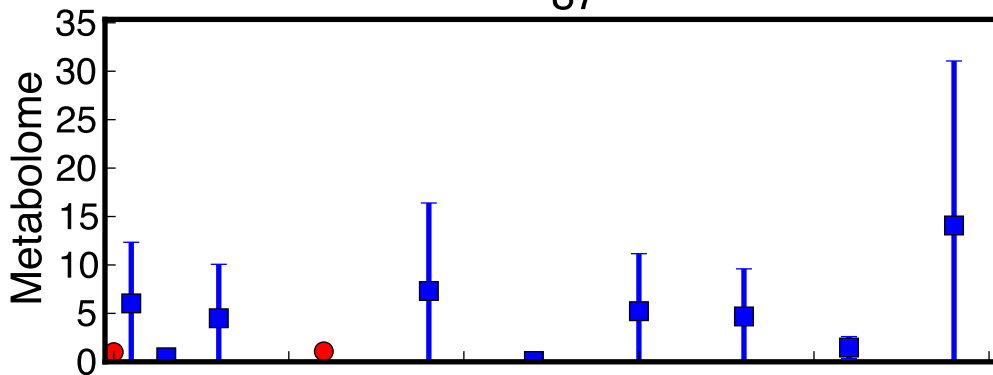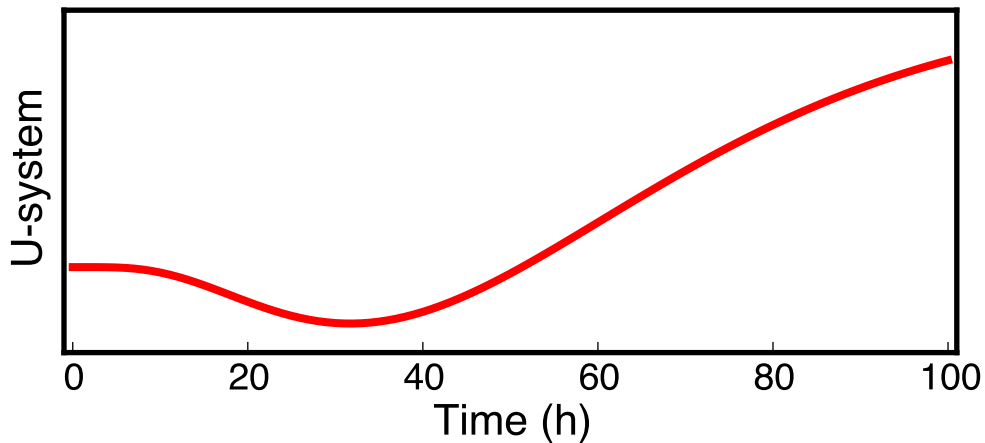

$X_{88}$

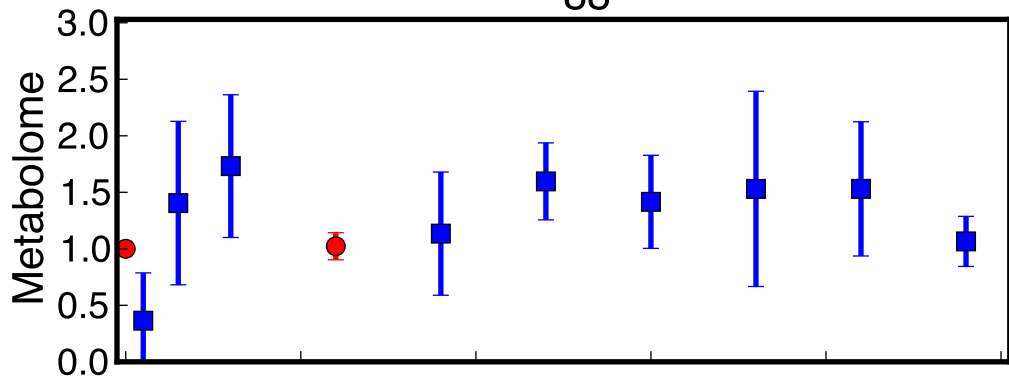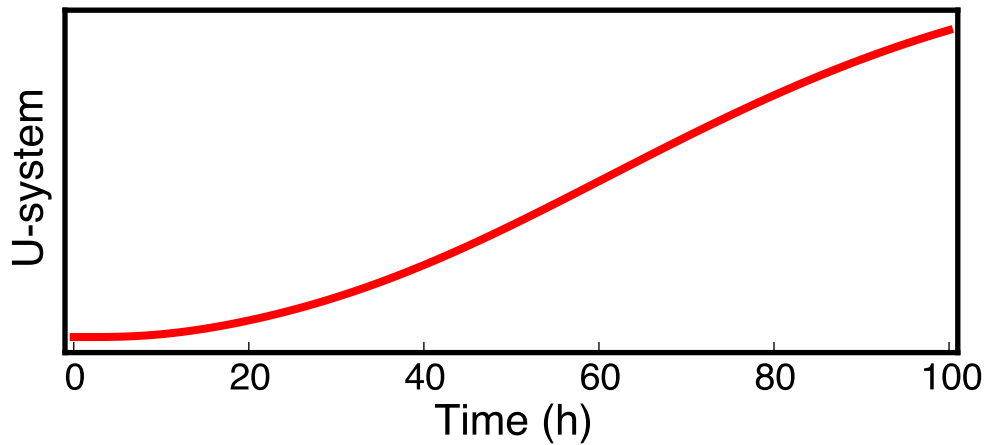



$X_{89}$

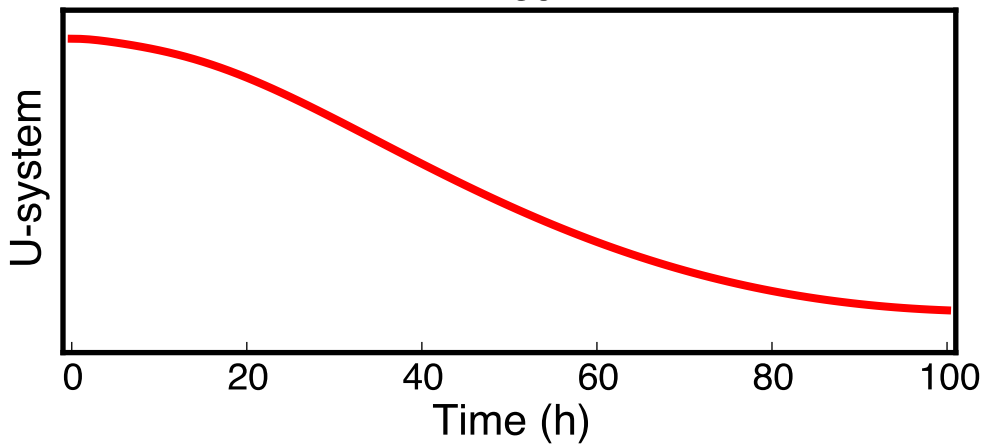

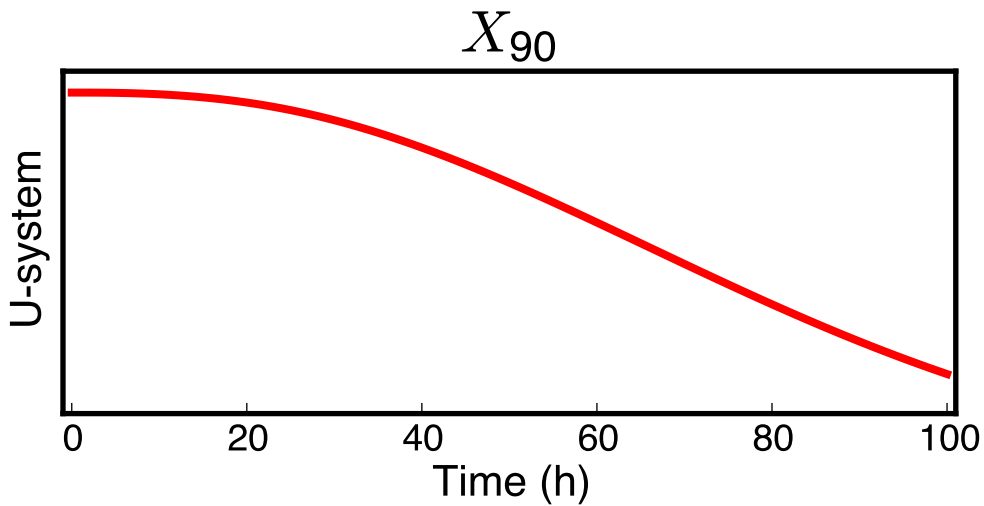

$X_{91}$

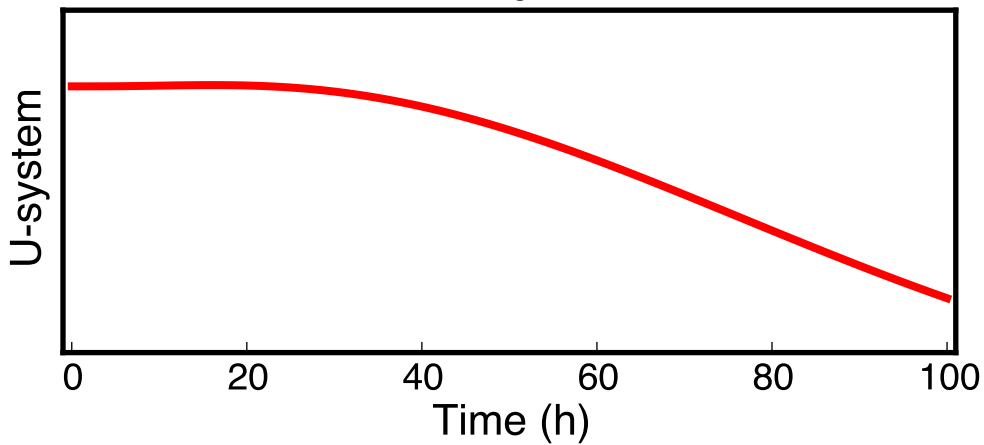

$X_{92}$

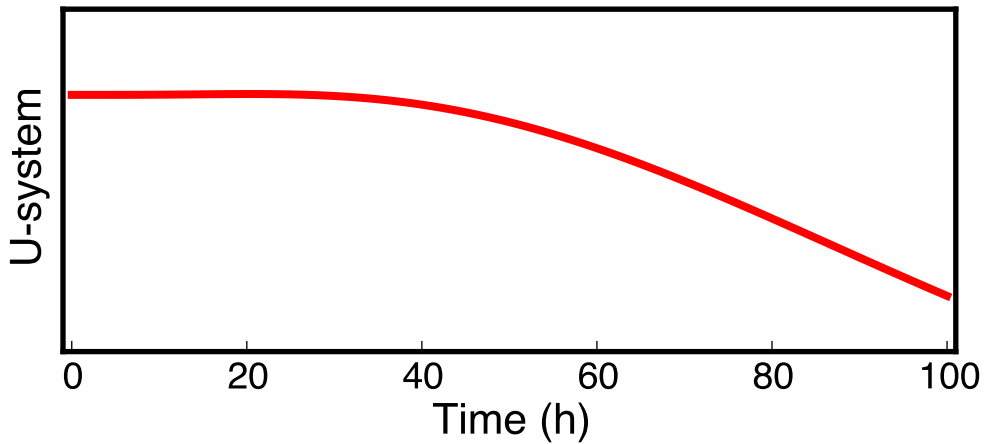

$X_{93}$ 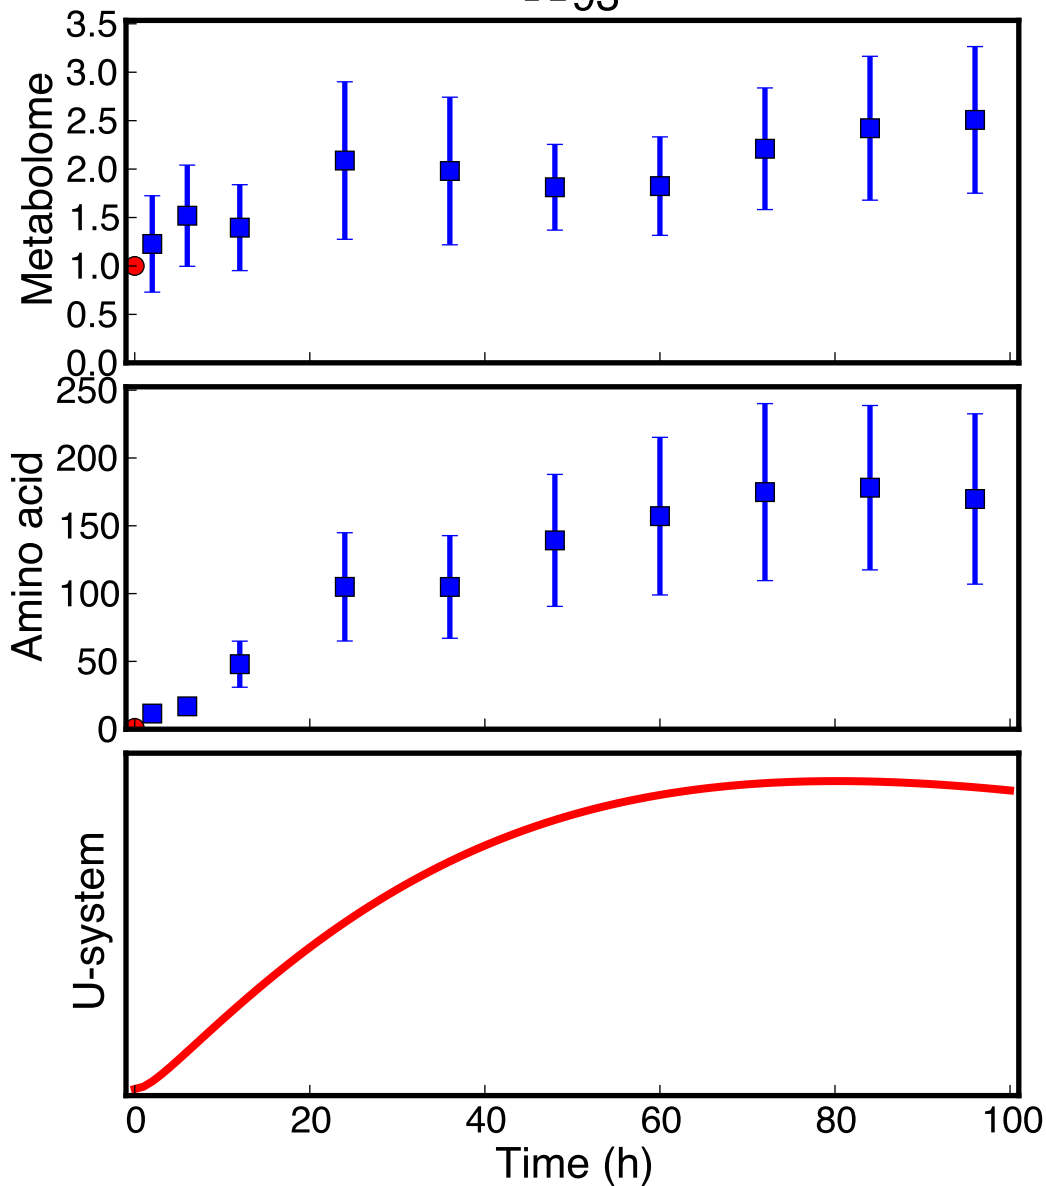

$X_{94}$

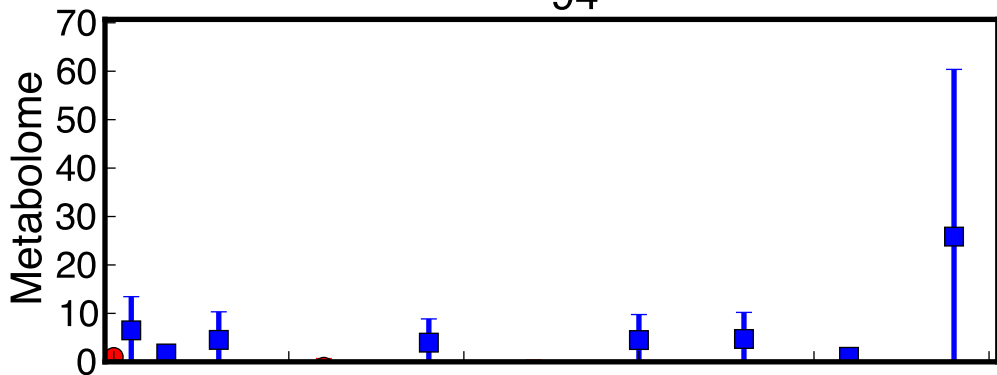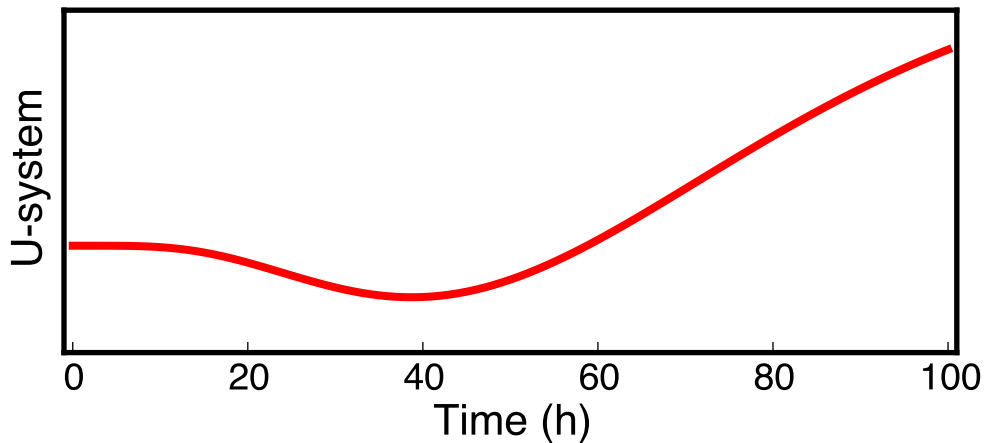

$X_{95}$

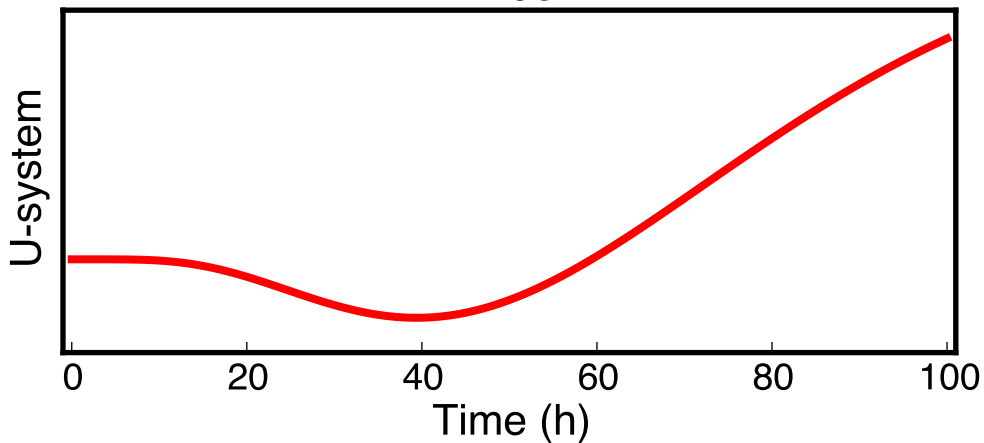

$X_{96}$

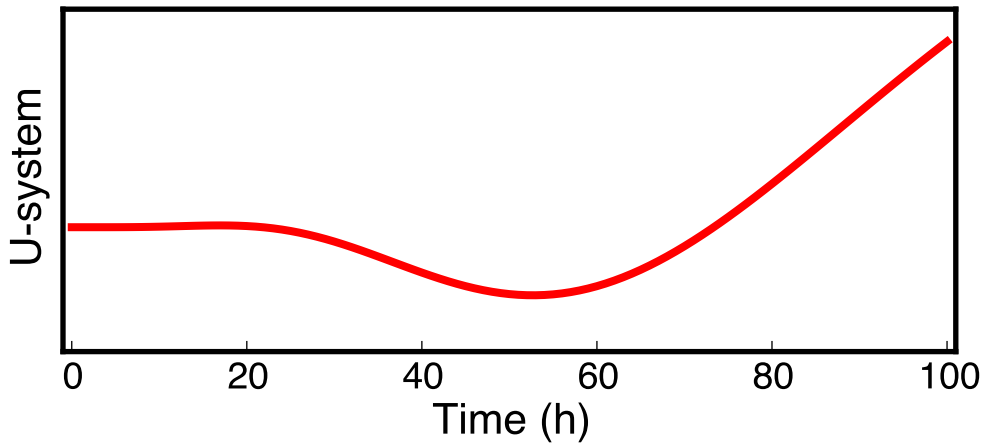



$X_{97}$

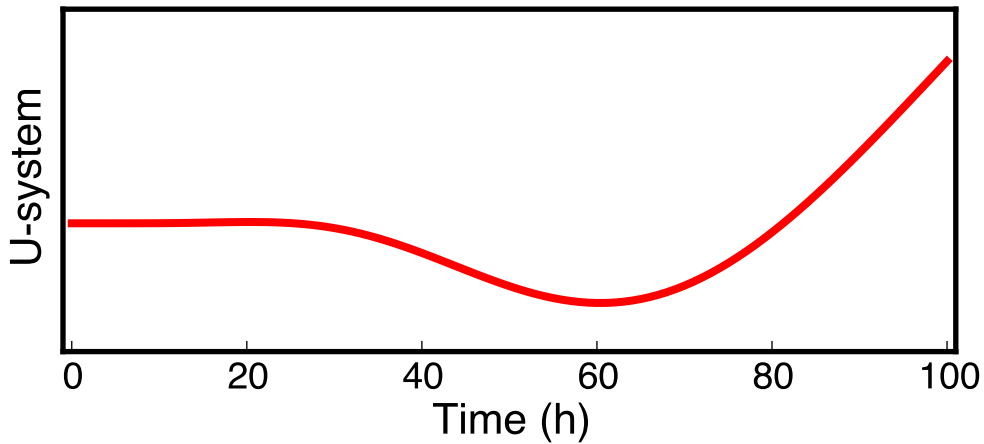

$X_{98}$

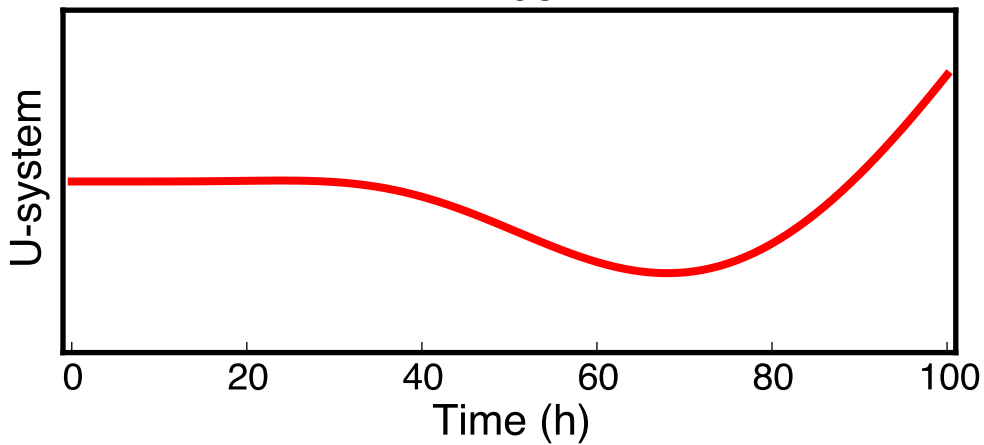

$X_{99}$

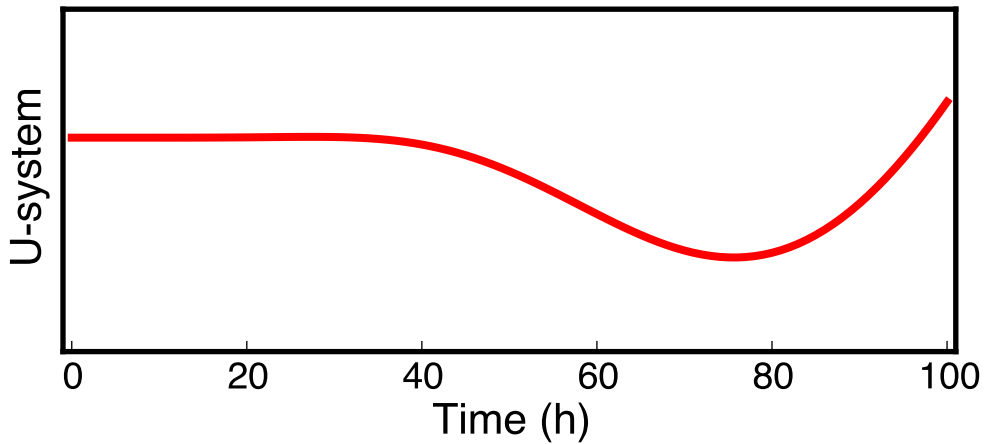

$X_{100}$

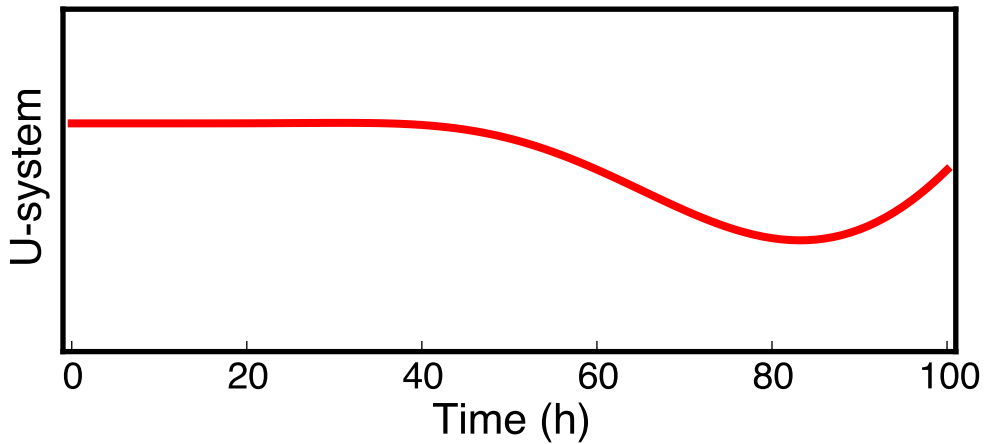

$X_{101}$

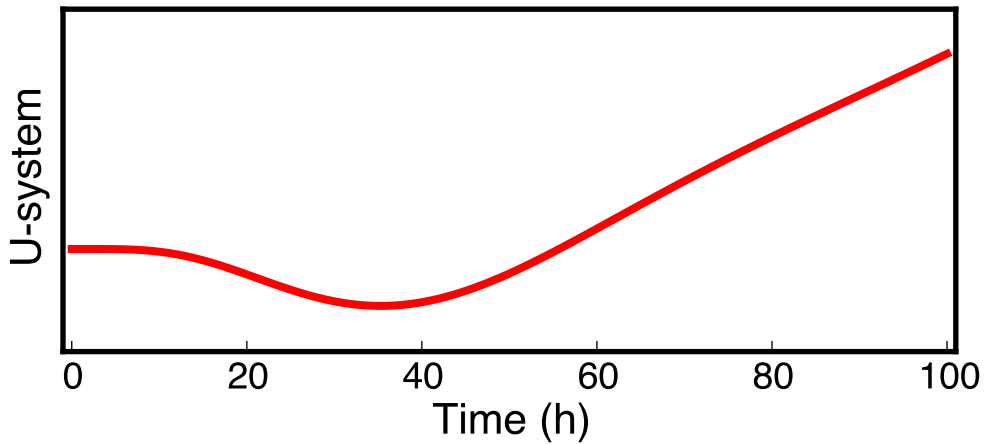

$X_{102}$

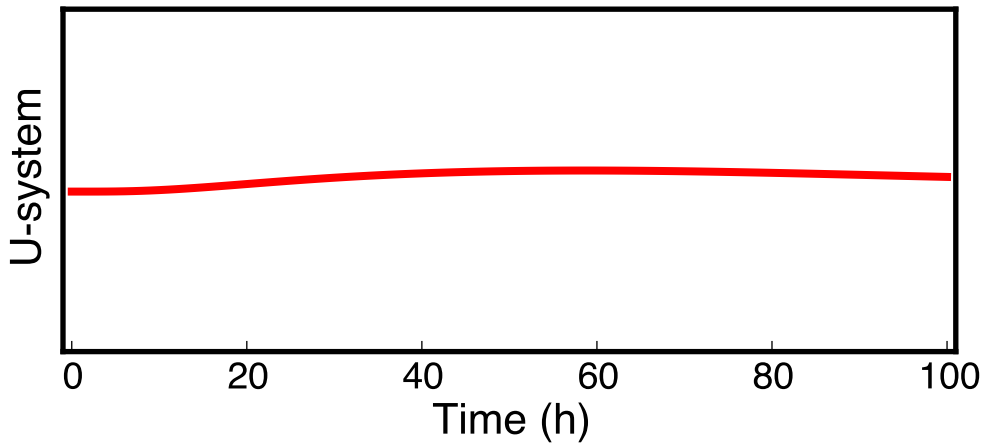

$X_{103}$

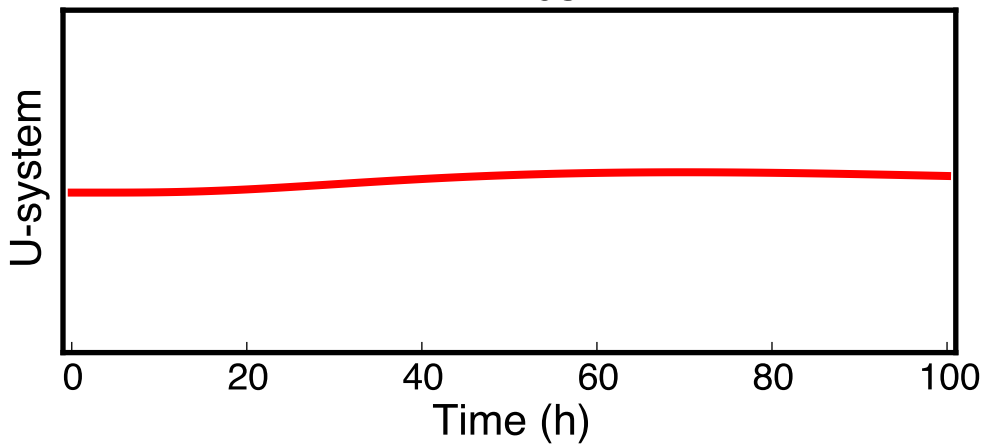

$X_{104}$

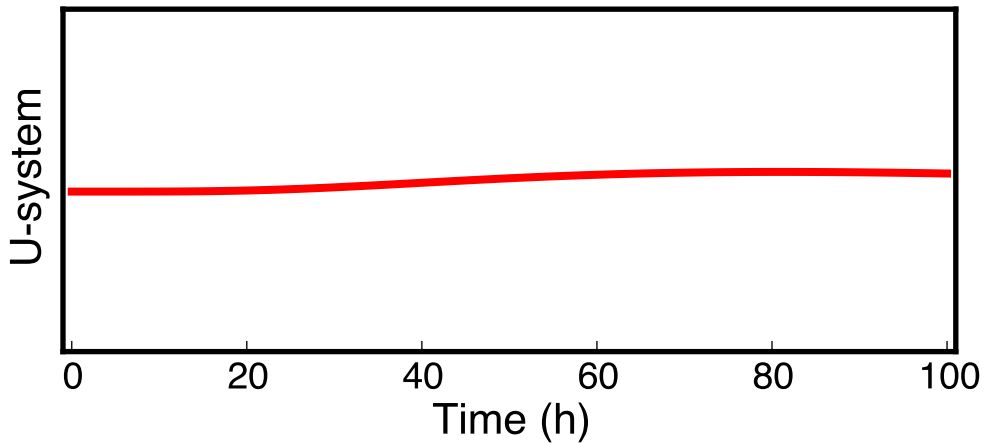



$X_{105}$

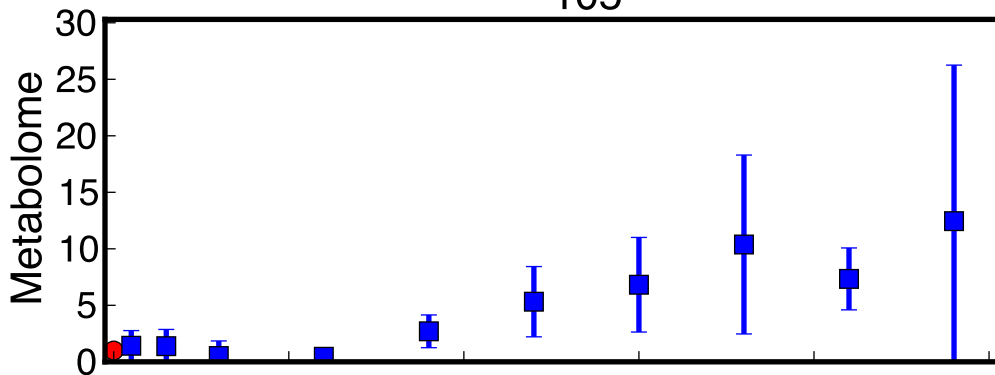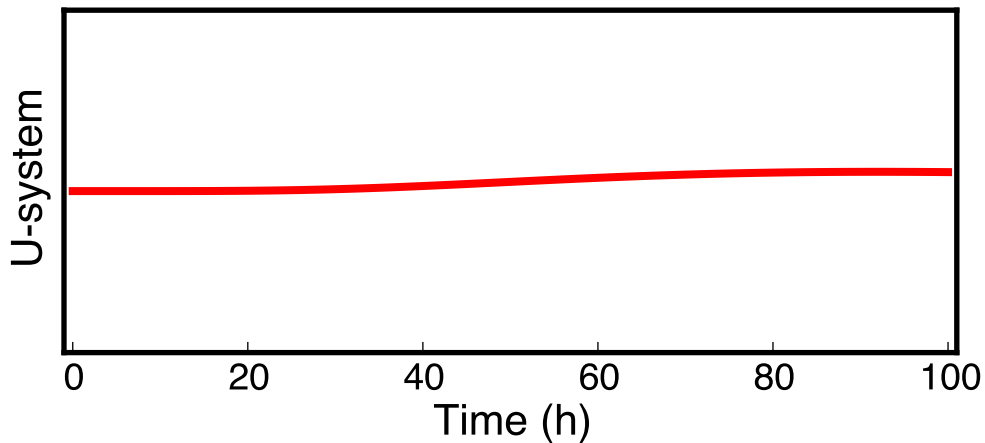

$X_{106}$

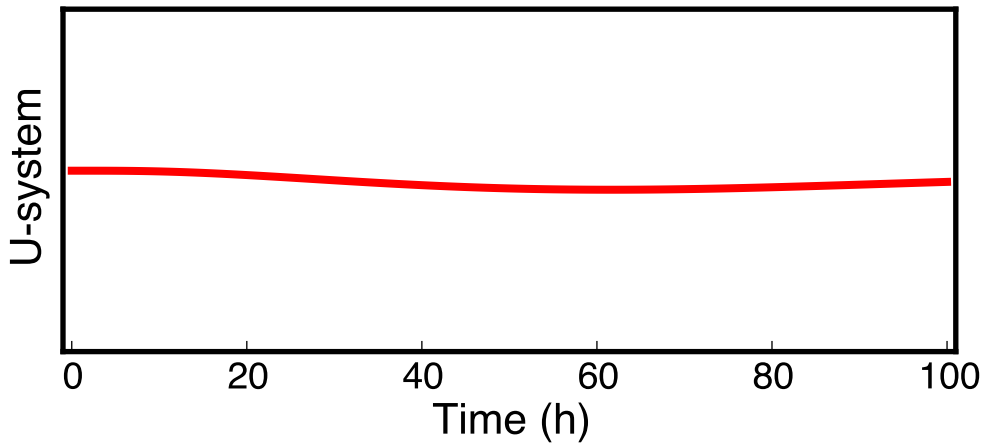

$X_{107}$

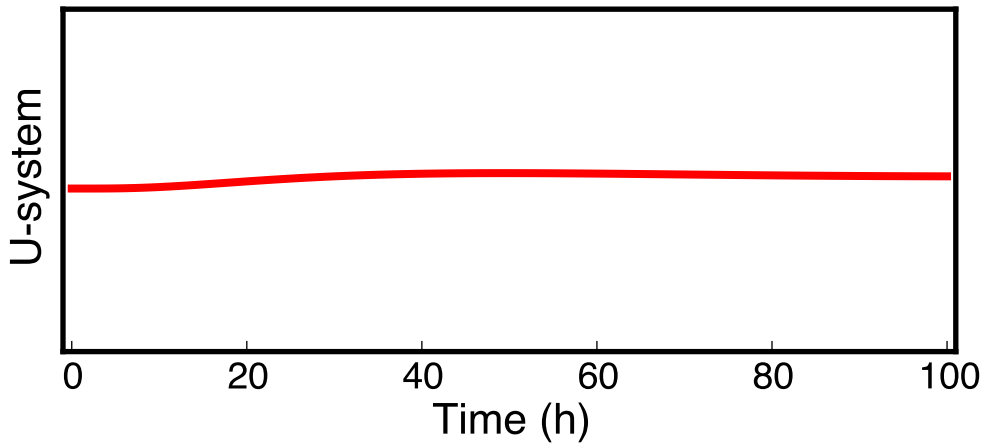

$X_{108}$

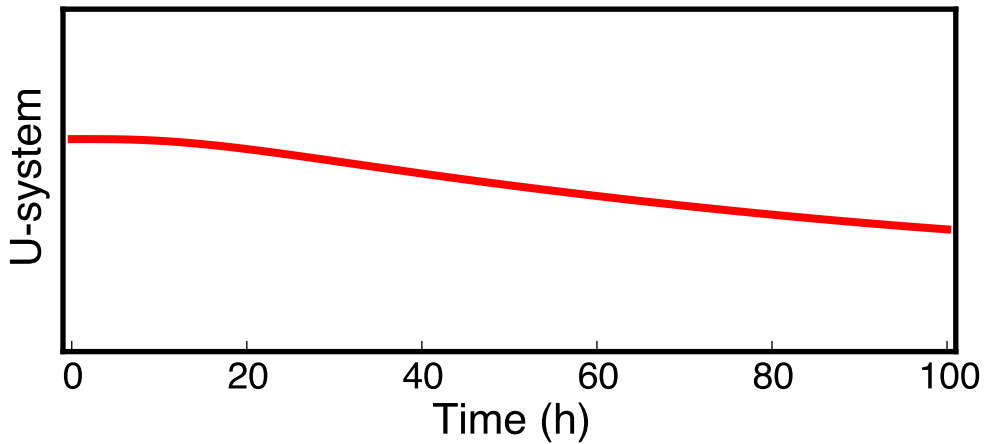

$X_{109}$

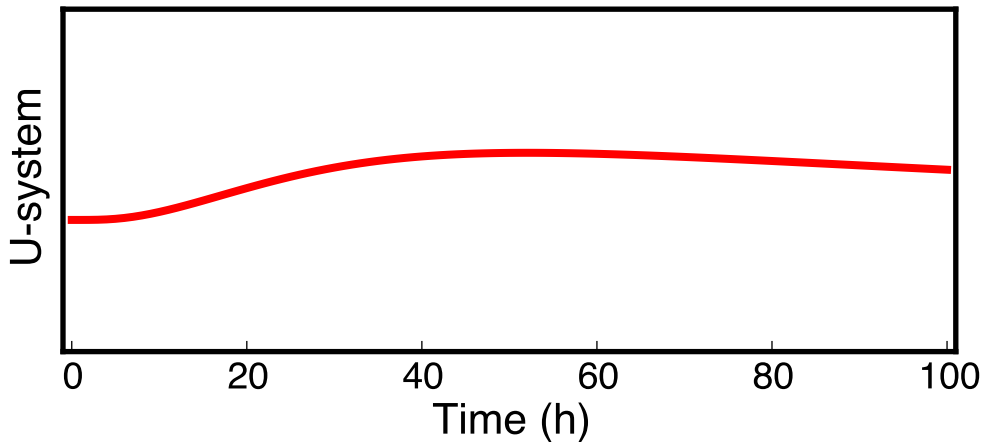

$X_{110}$

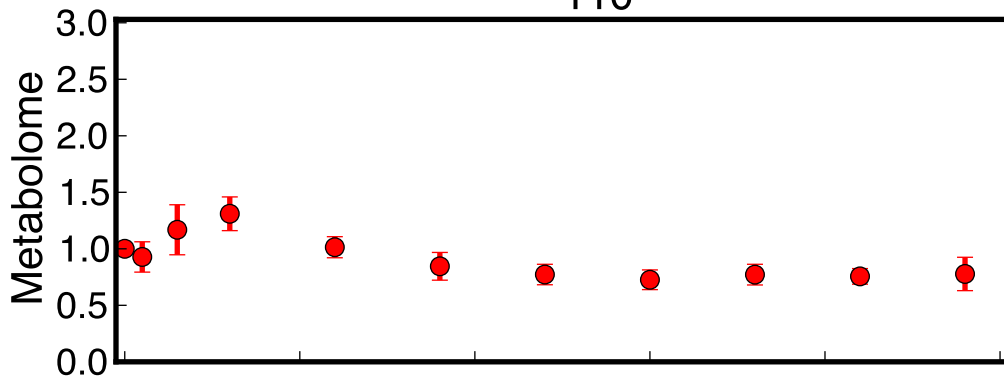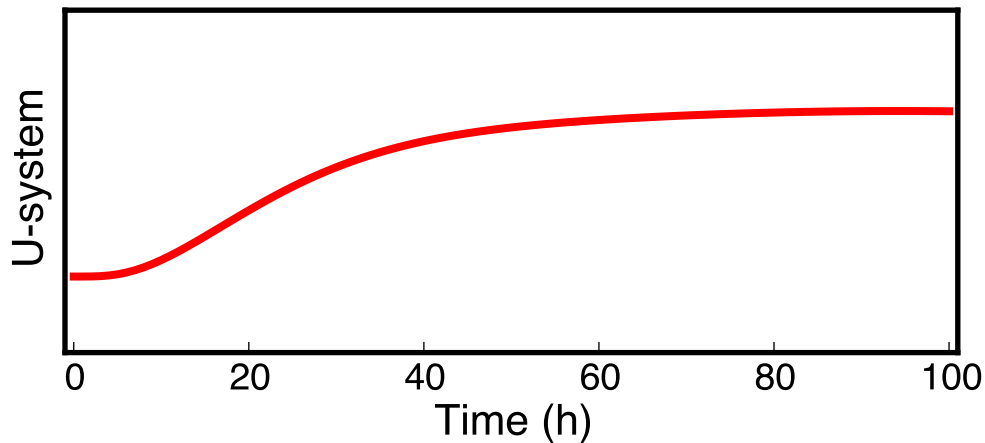

$X_{111}$

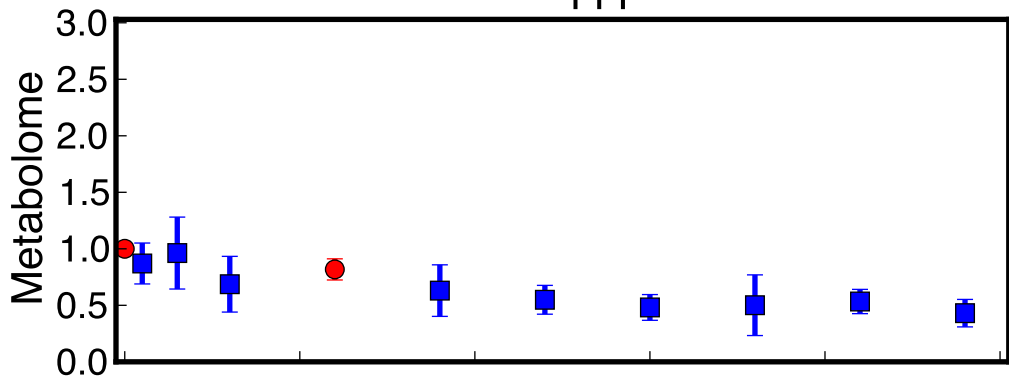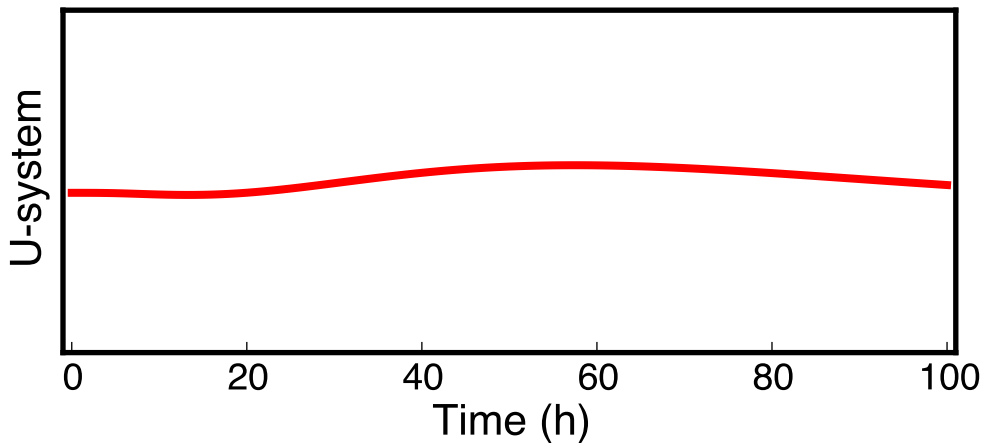

$X_{112}$

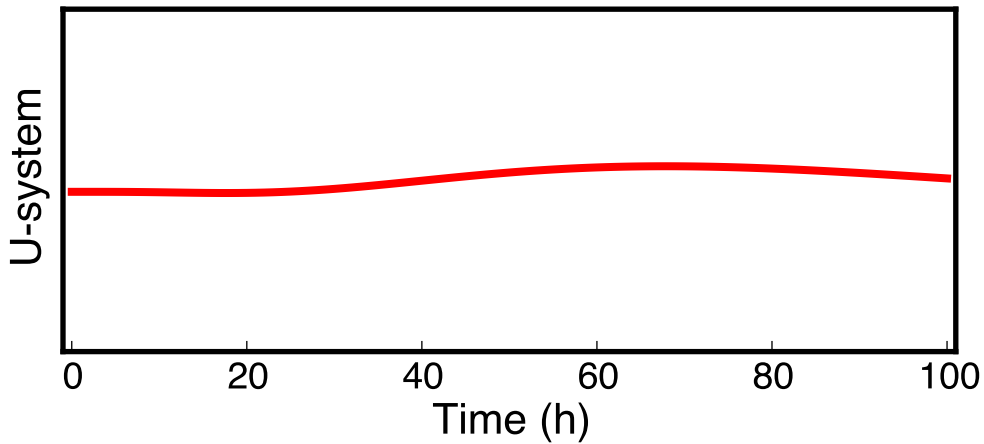



$X_{113}$ 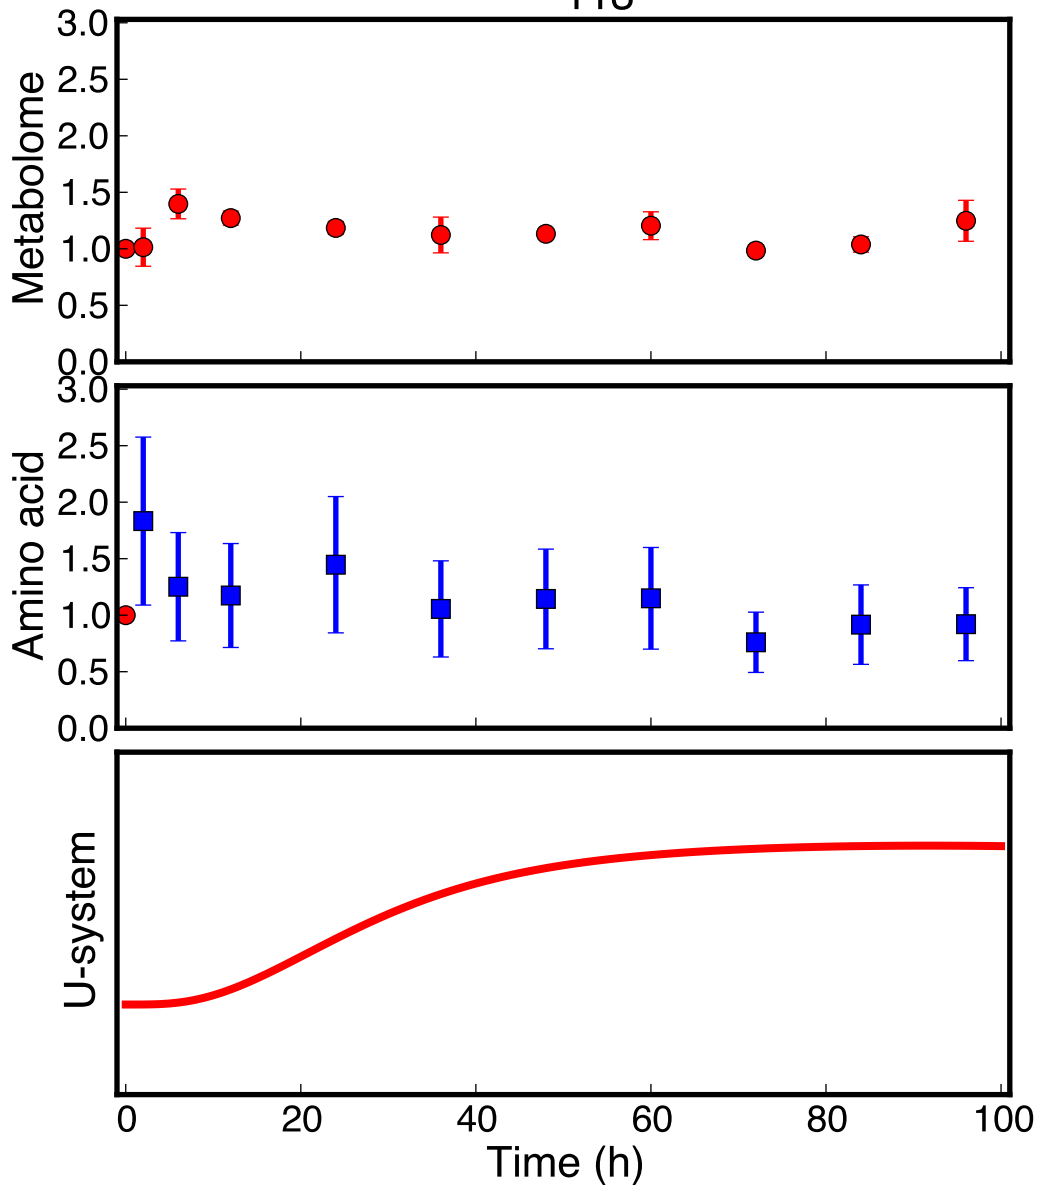

$X_{114}$

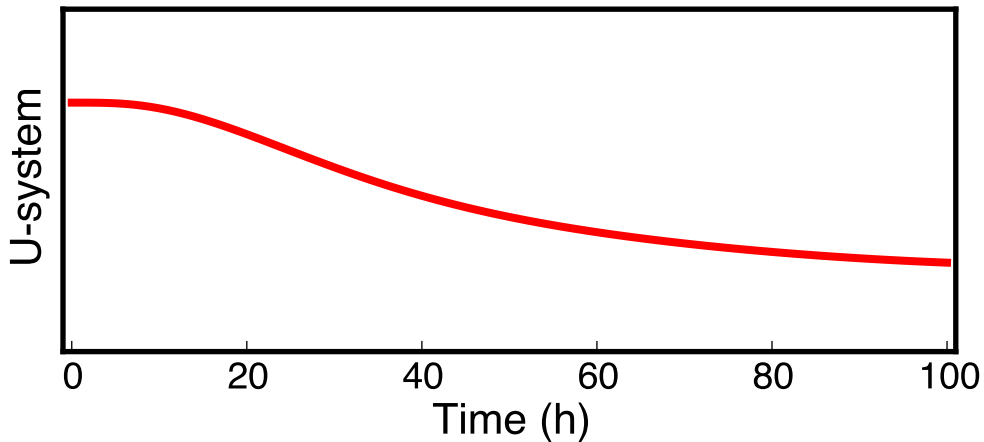

$X_{115}$

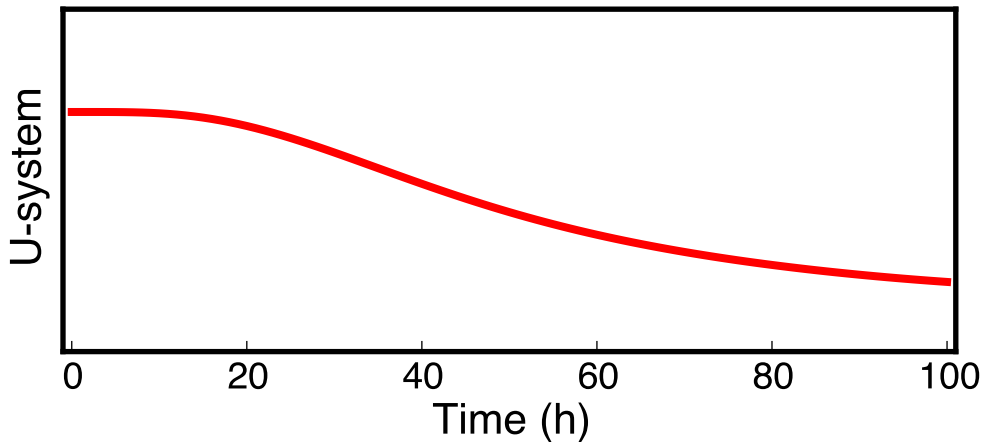

$X_{116}$

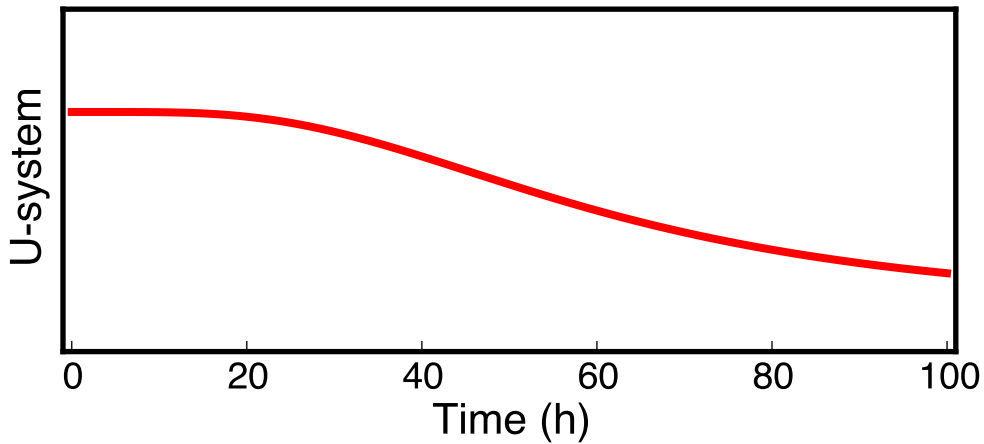

$X_{117}$

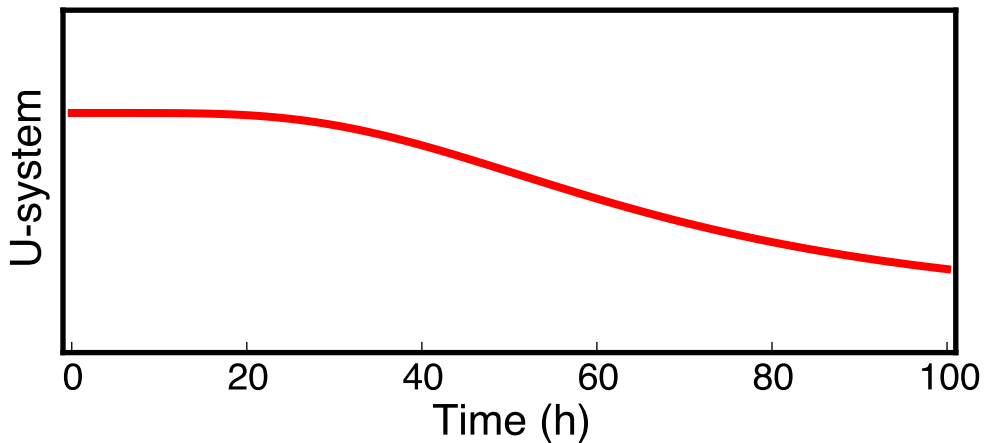

$X_{118}$

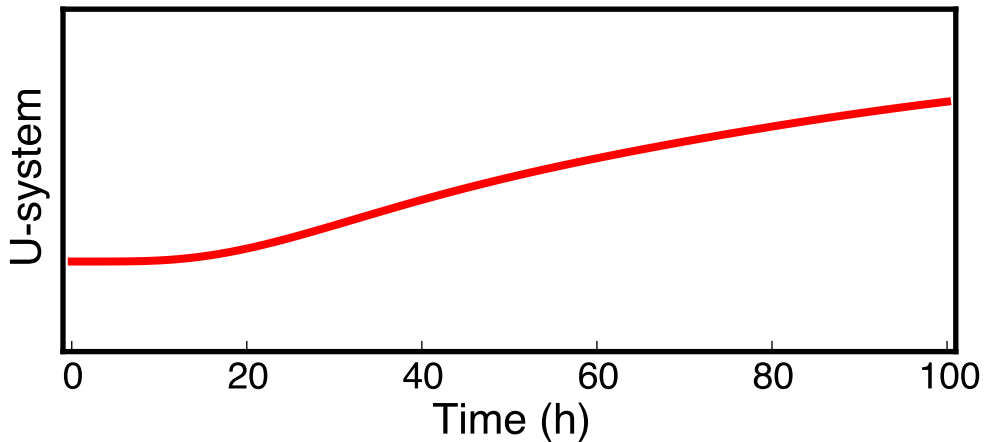

$X_{119}$

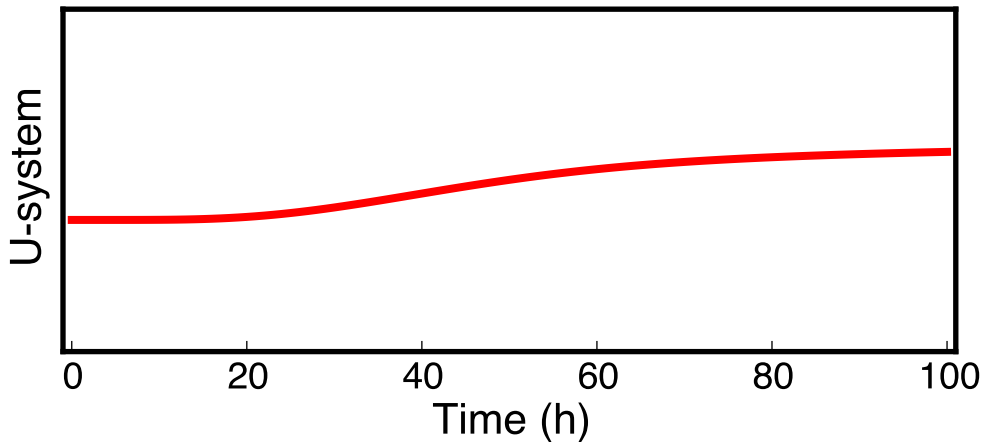

$X_{120}$

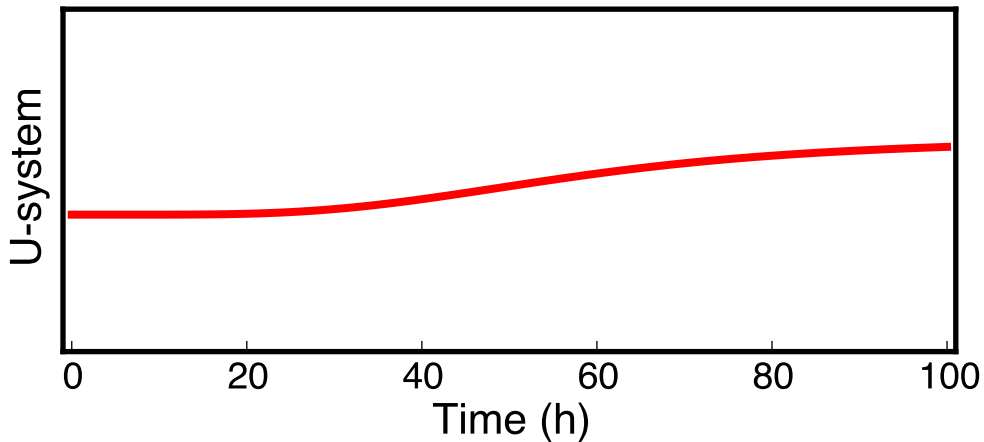



$X_{121}$

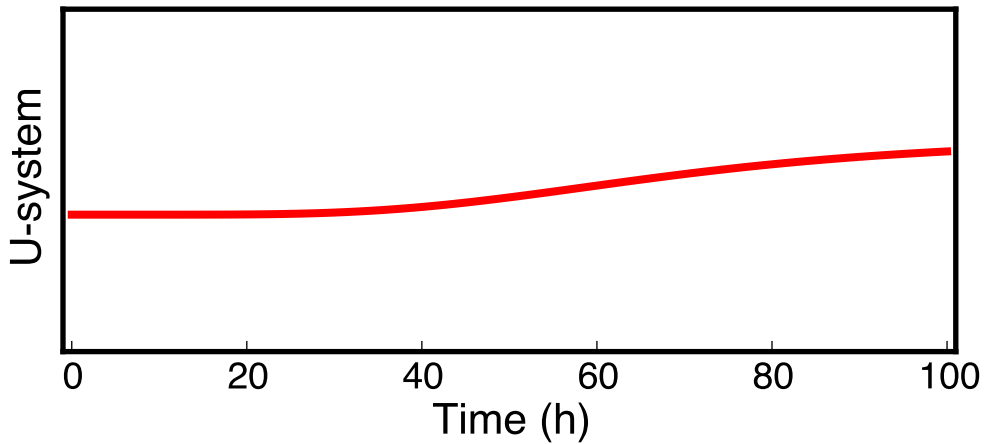

$X_{122}$

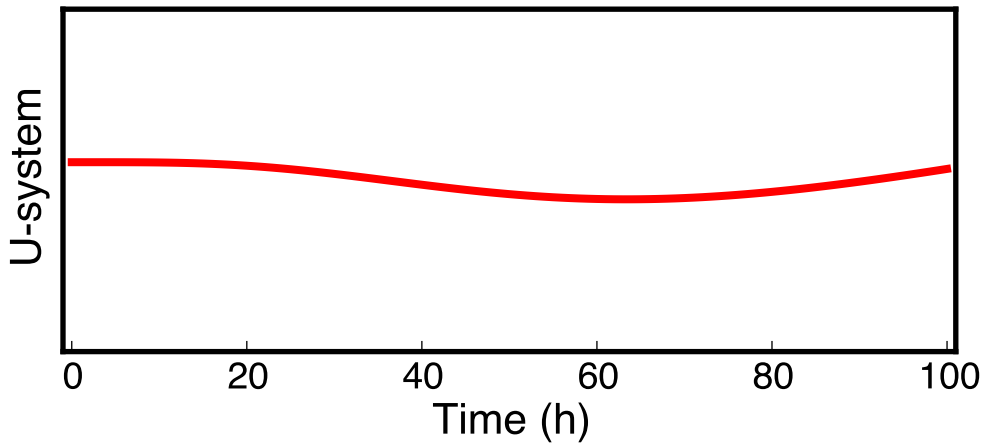

$X_{123}$ 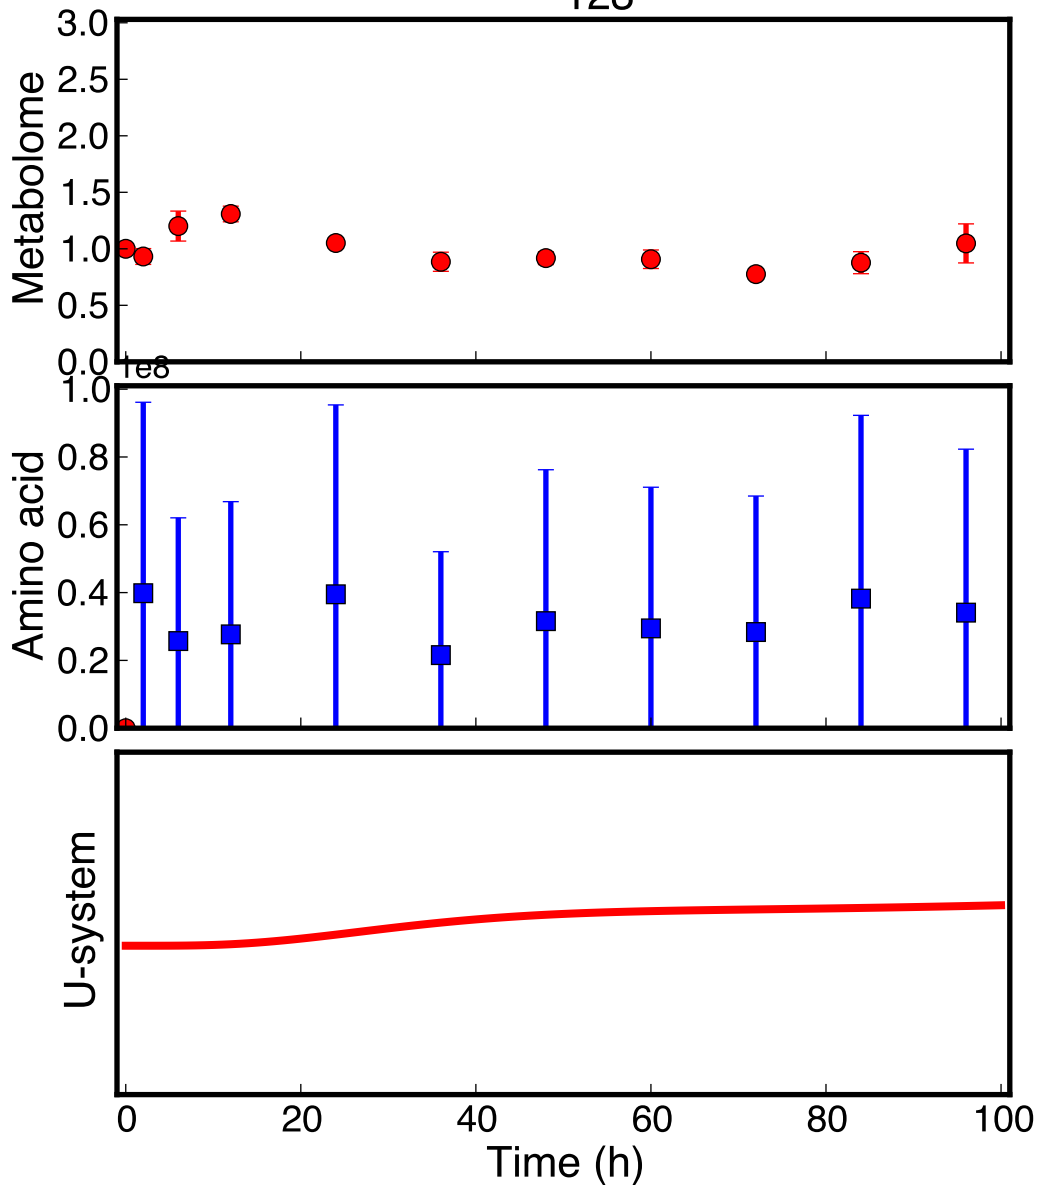

$X_{124}$

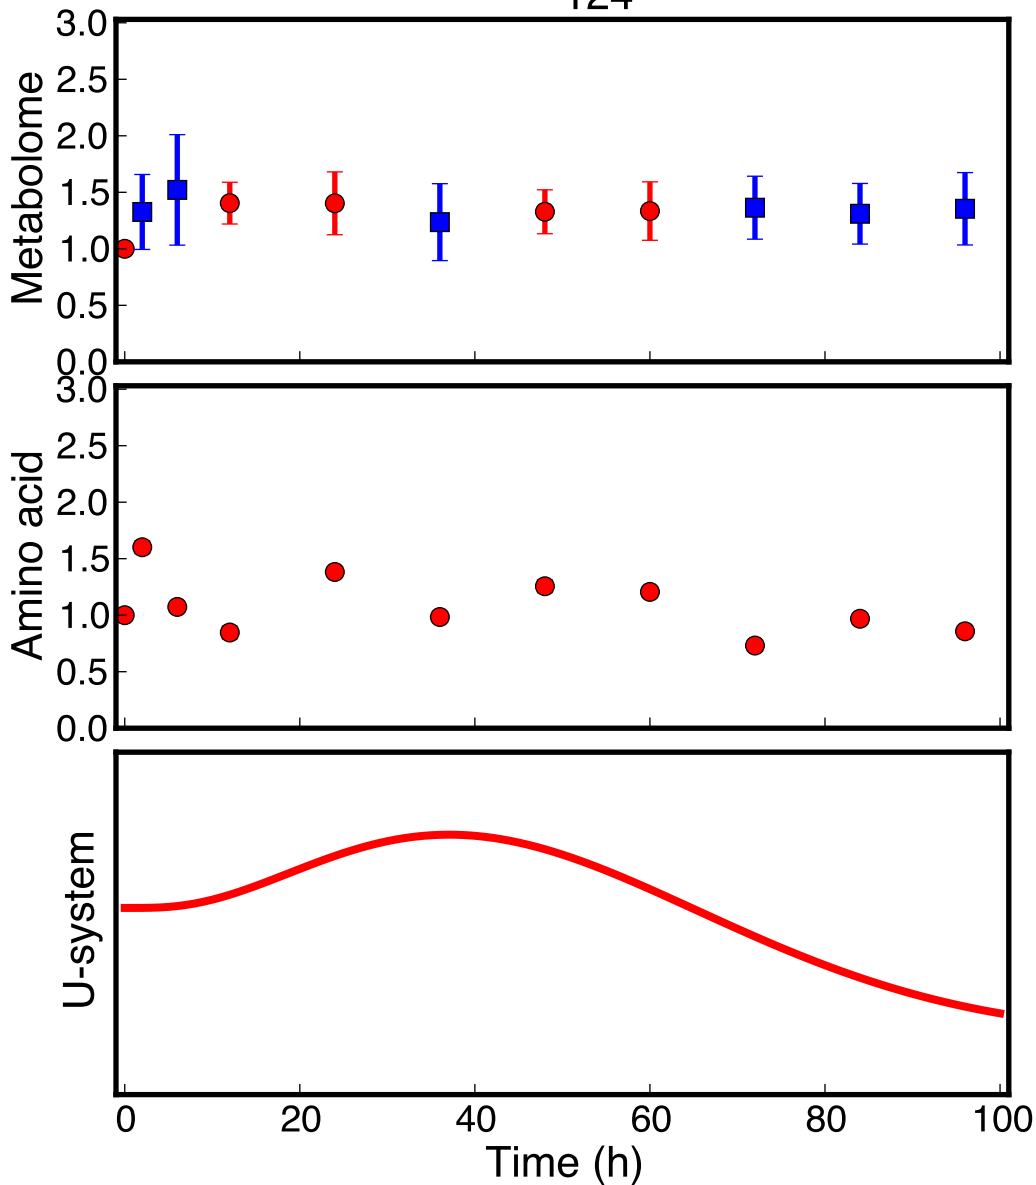

$X_{125}$

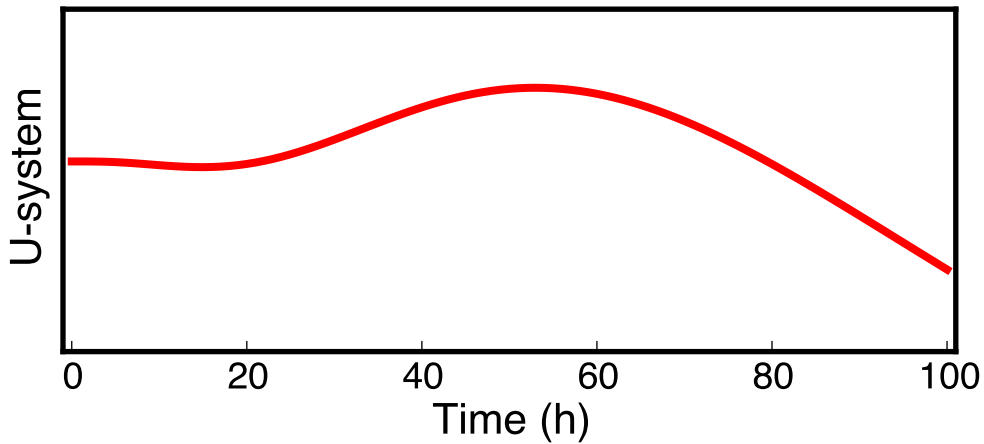

$X_{126}$

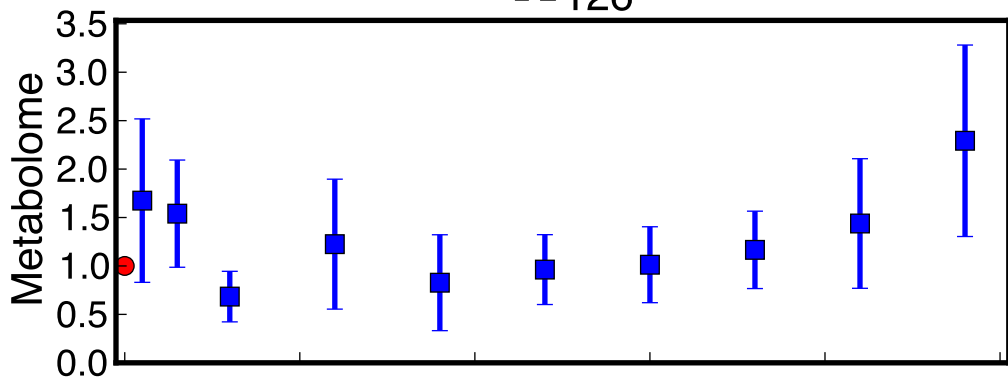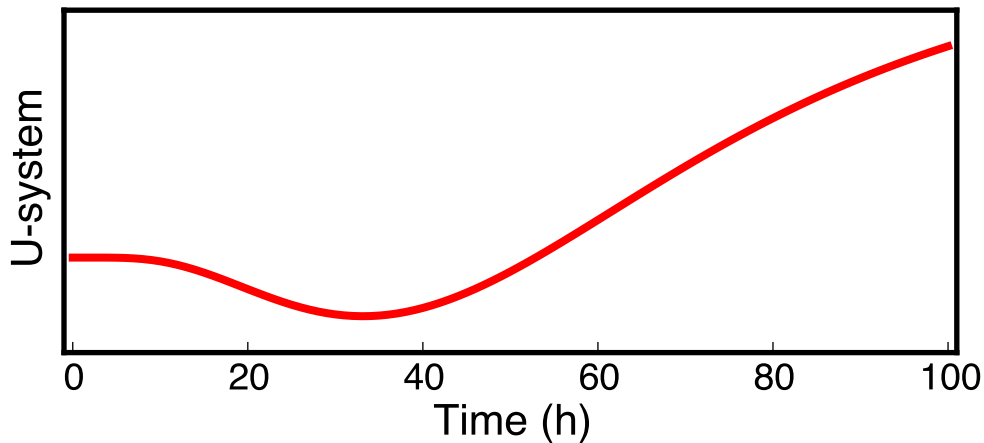

$X_{127}$

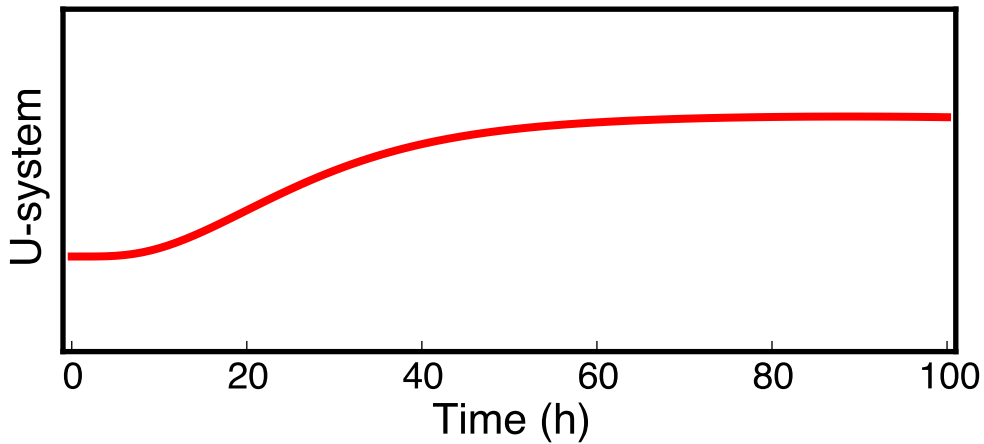

$X_{128}$

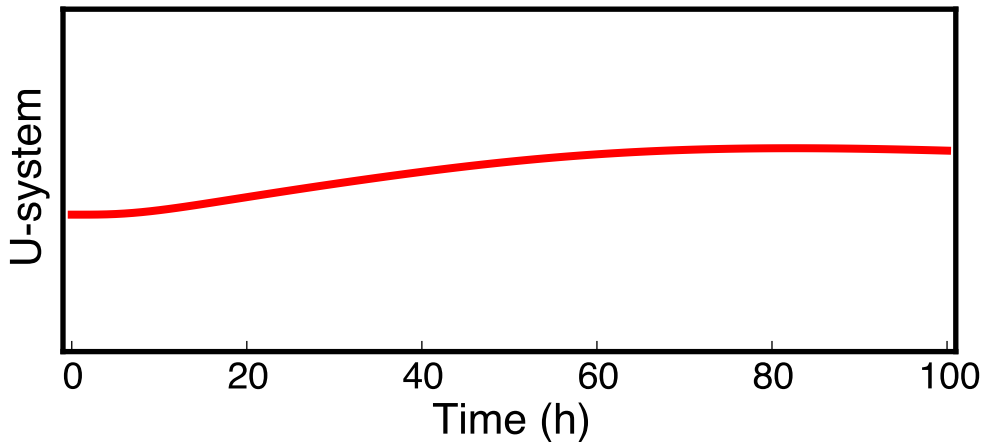



$X_{129}$ 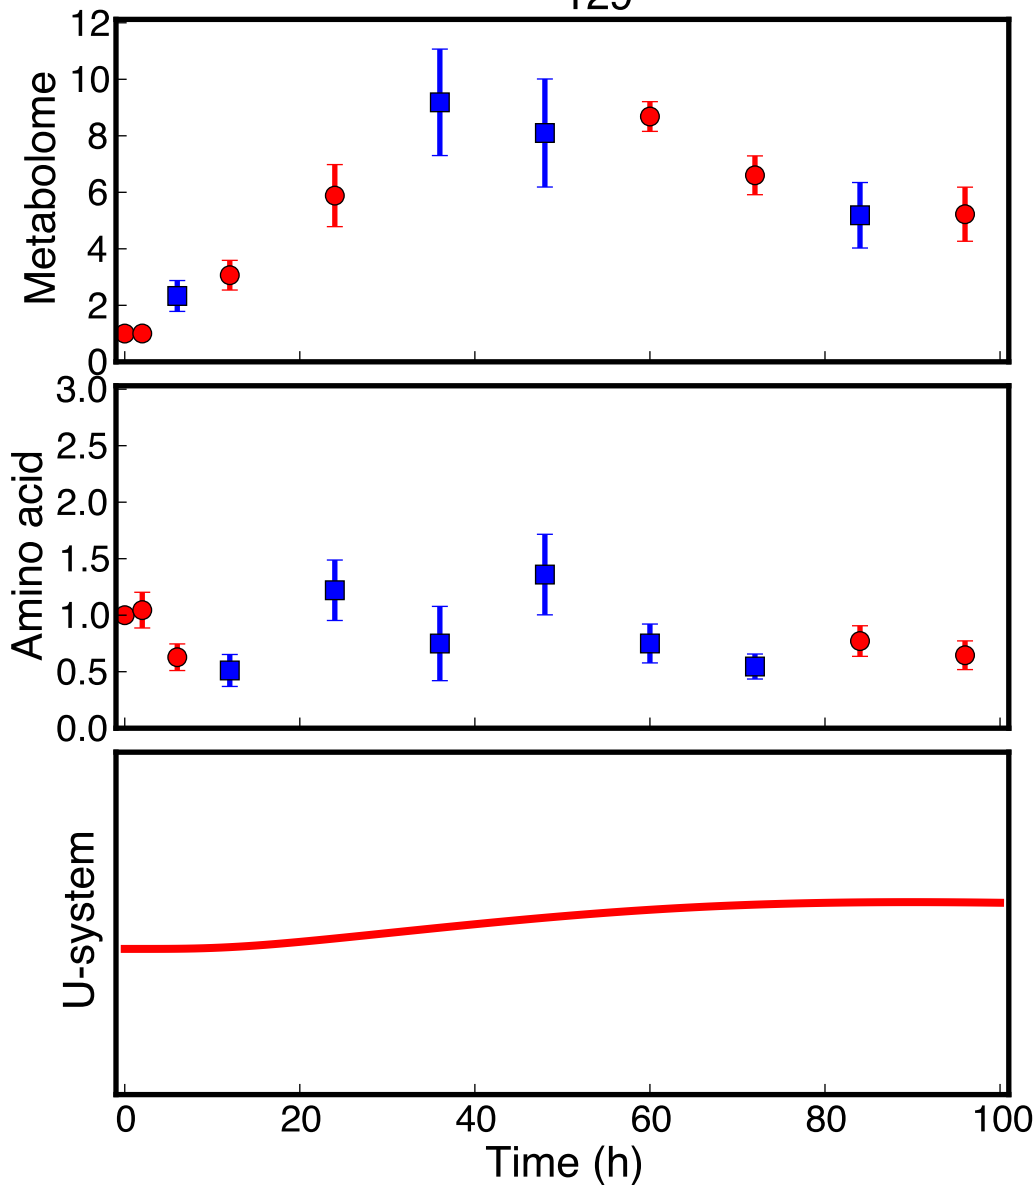

$X_{130}$

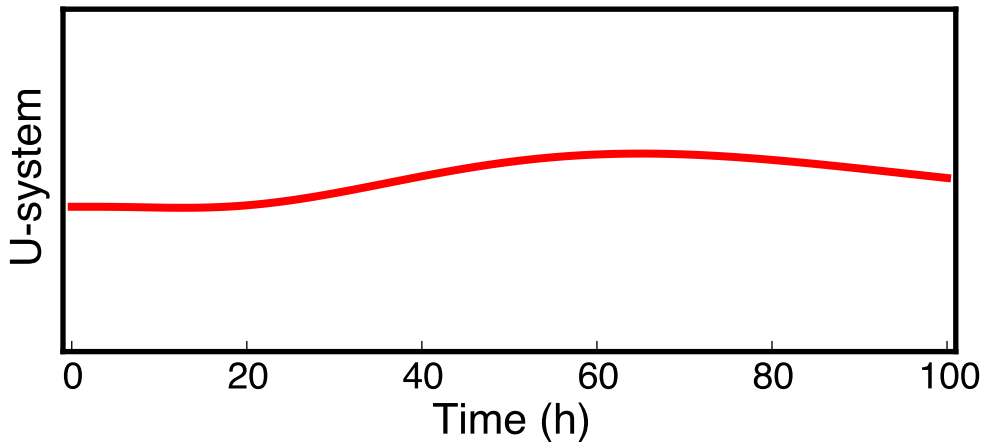

$X_{131}$

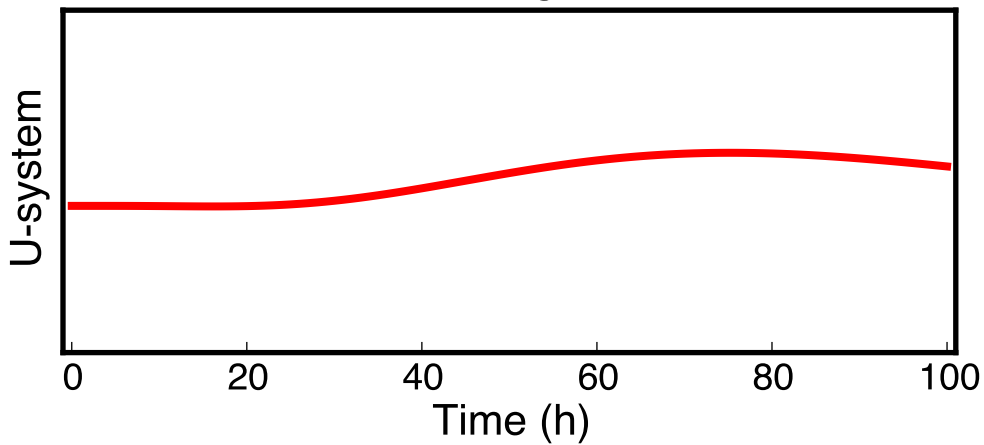

$X_{132}$

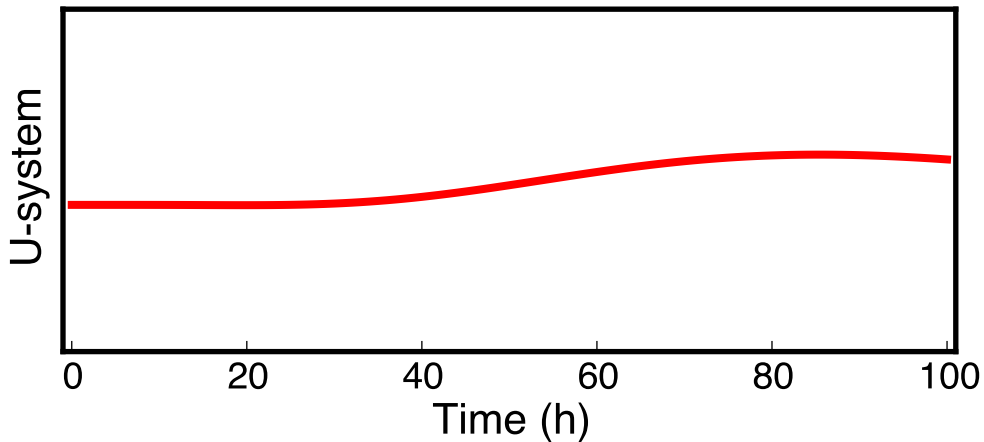

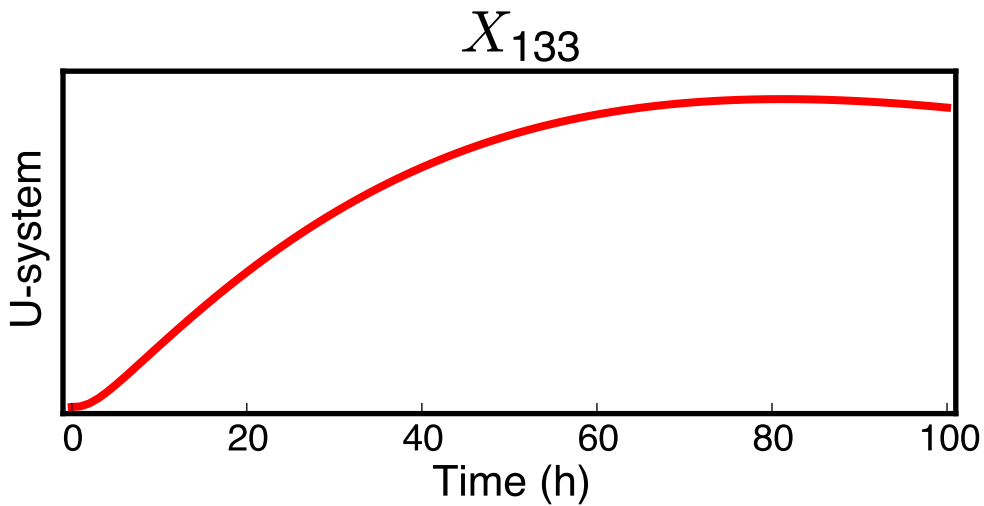

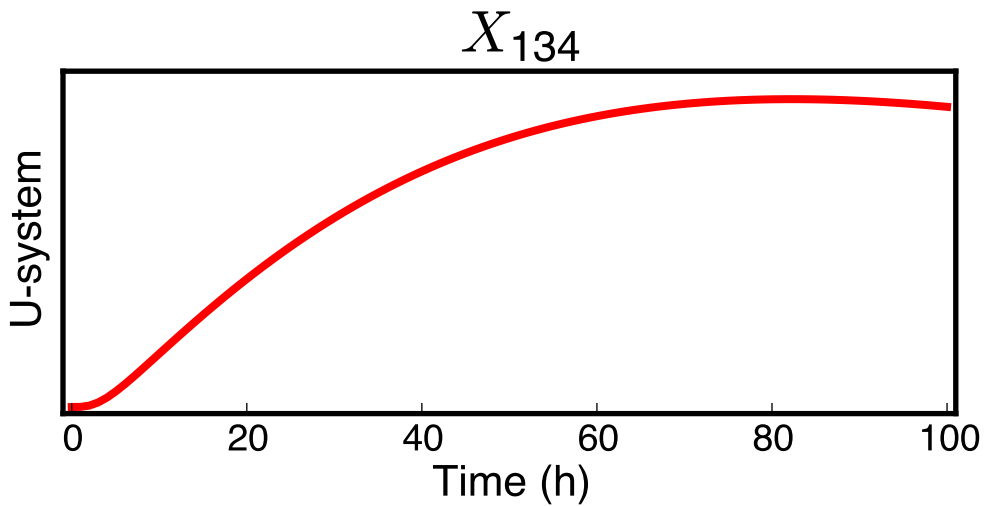

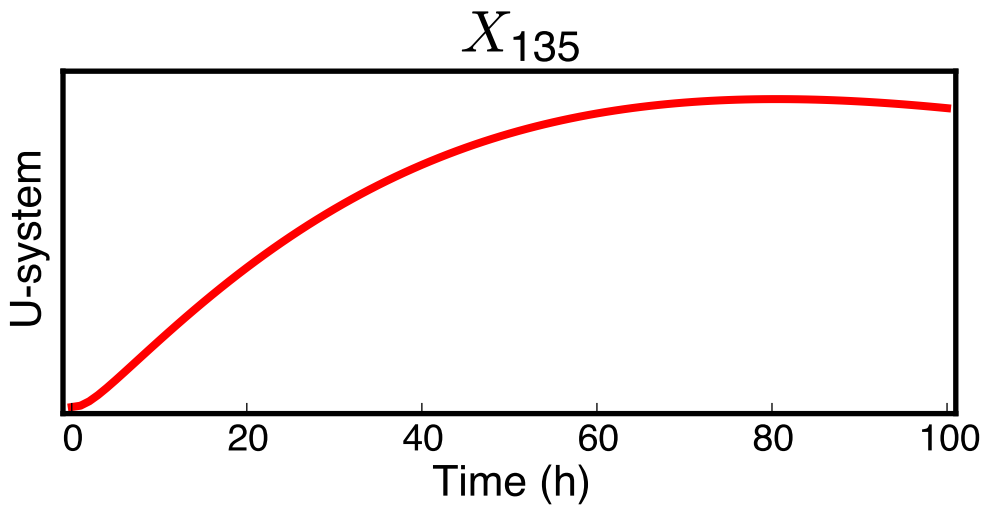

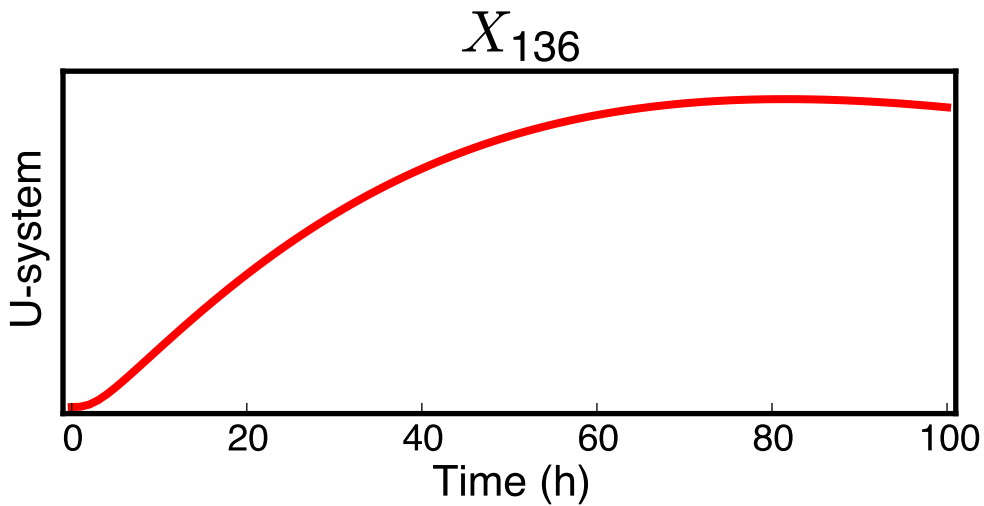



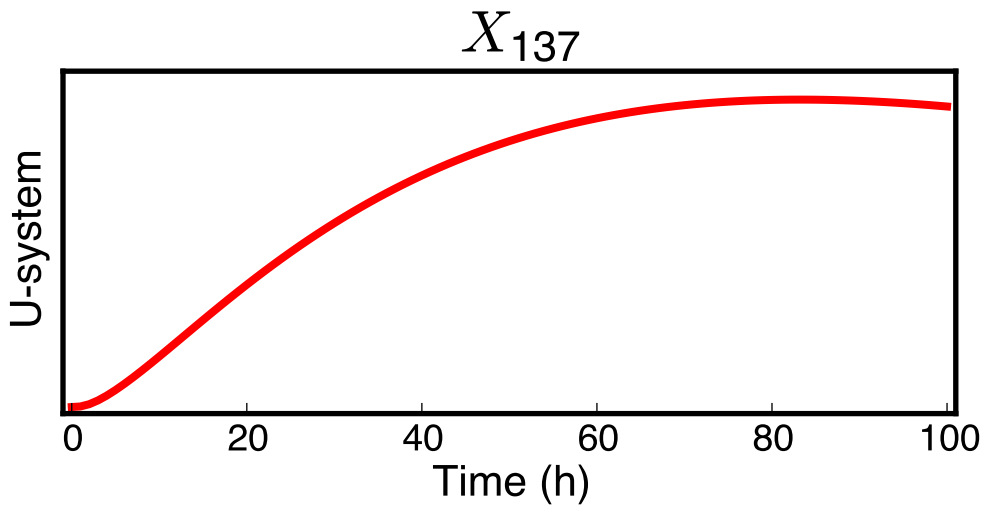

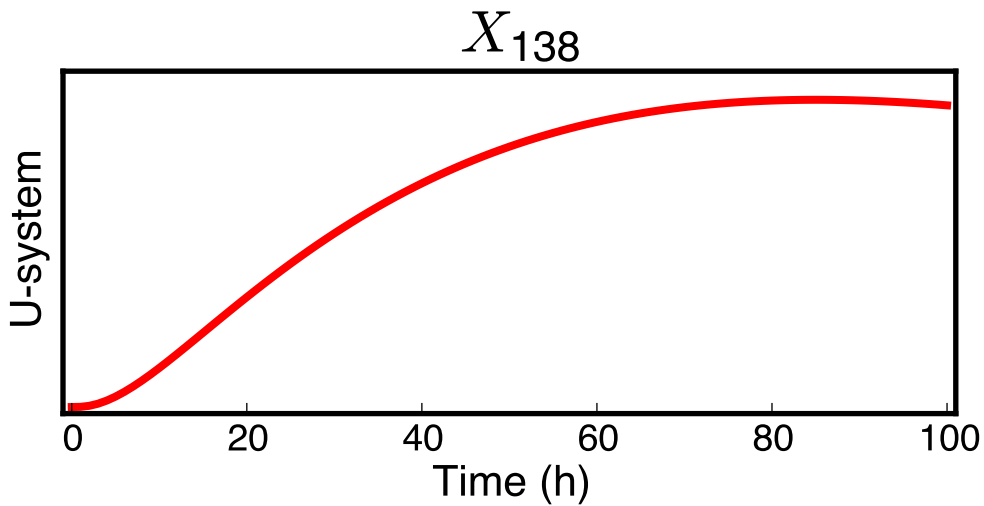

$X_{139}$

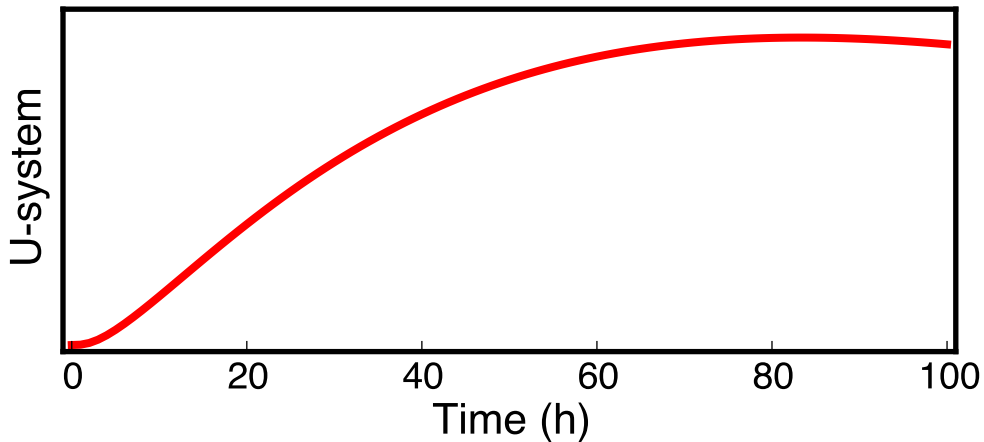

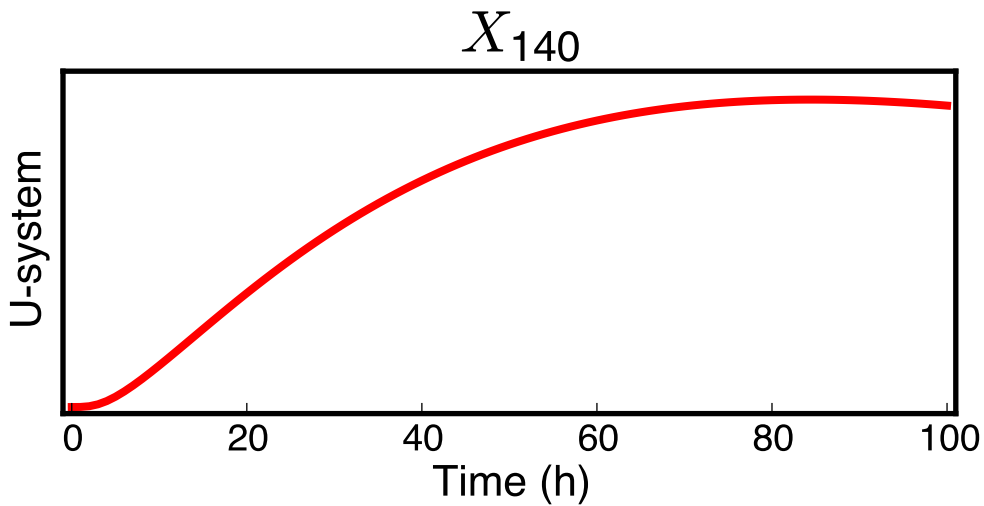

$X_{141}$

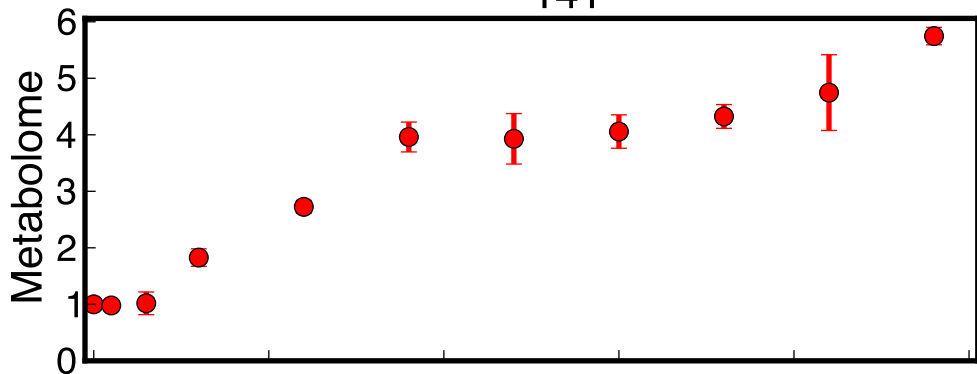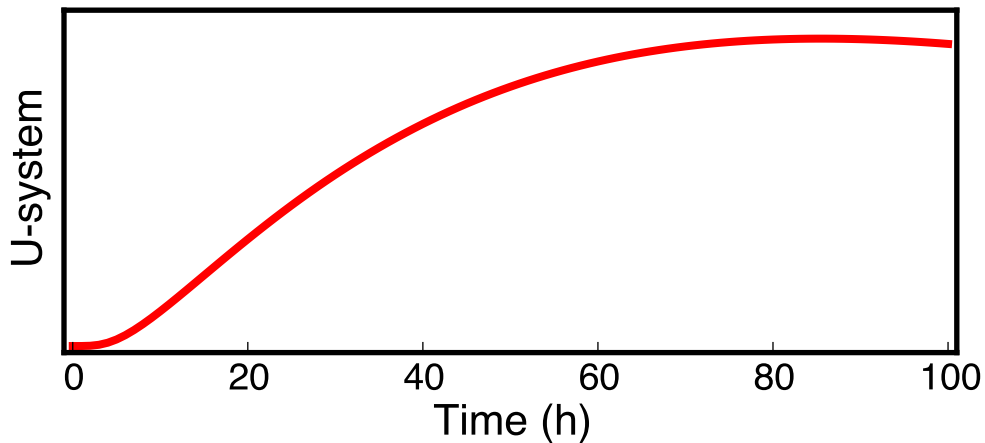

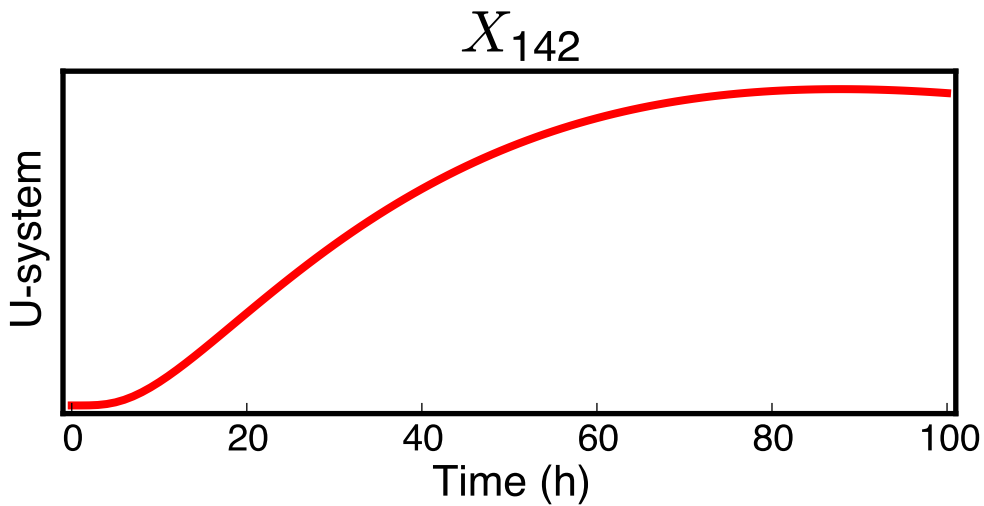

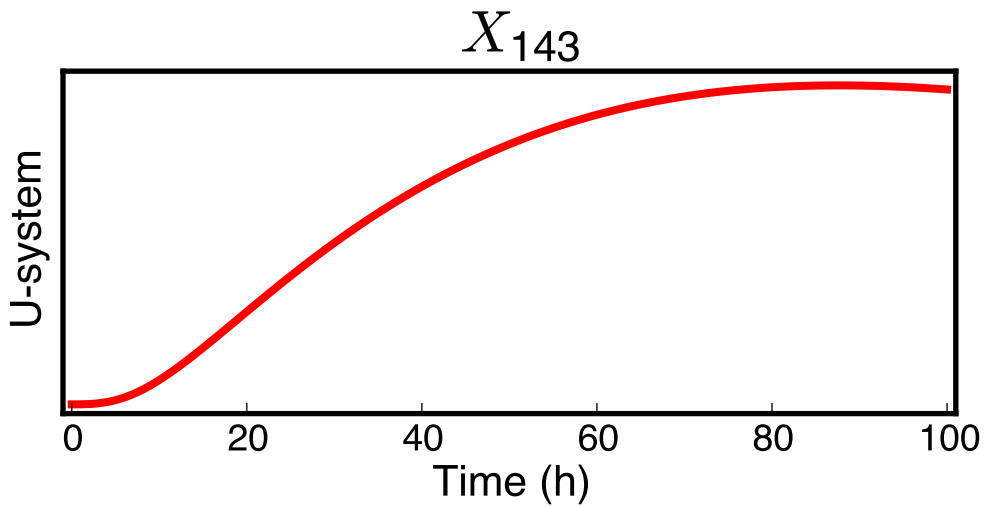

$X_{144}$

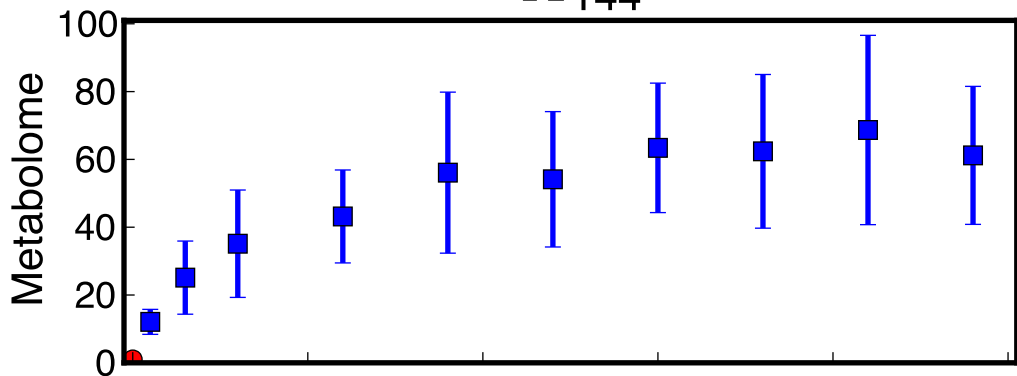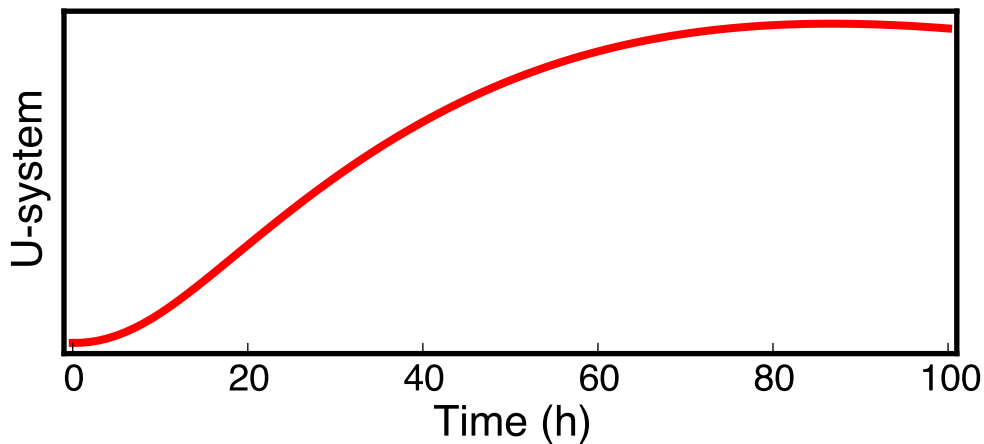



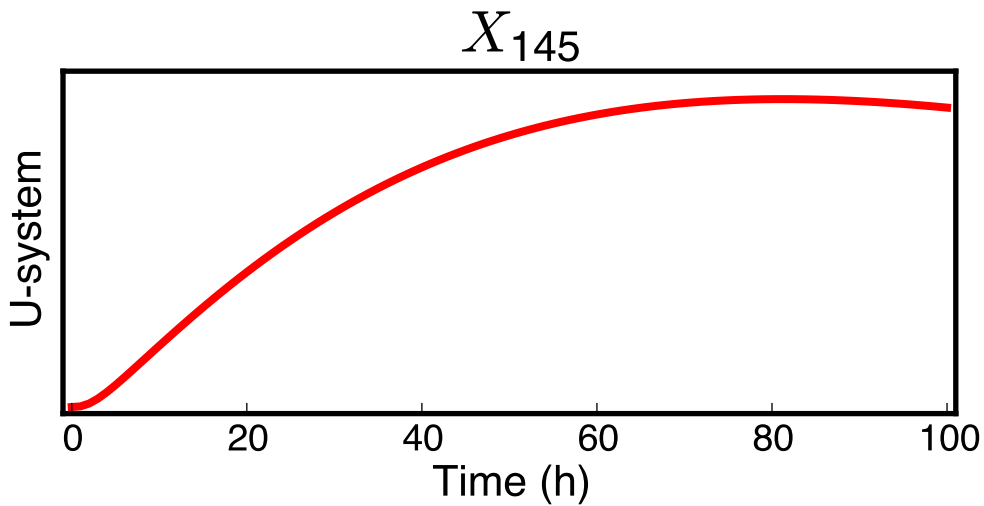

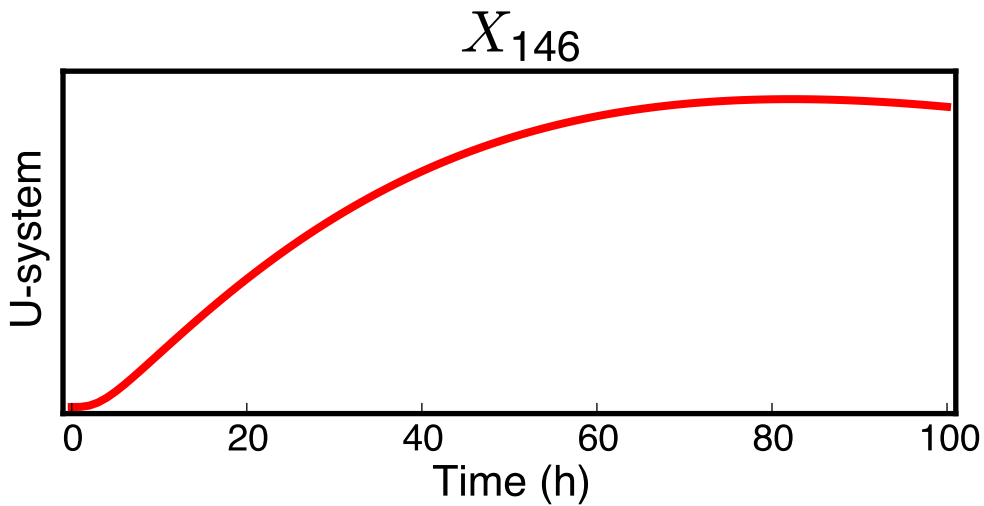

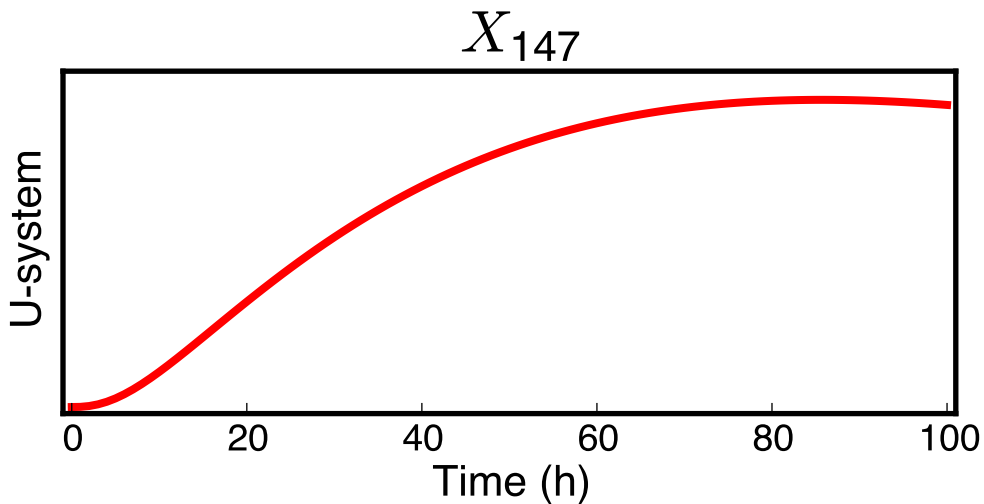

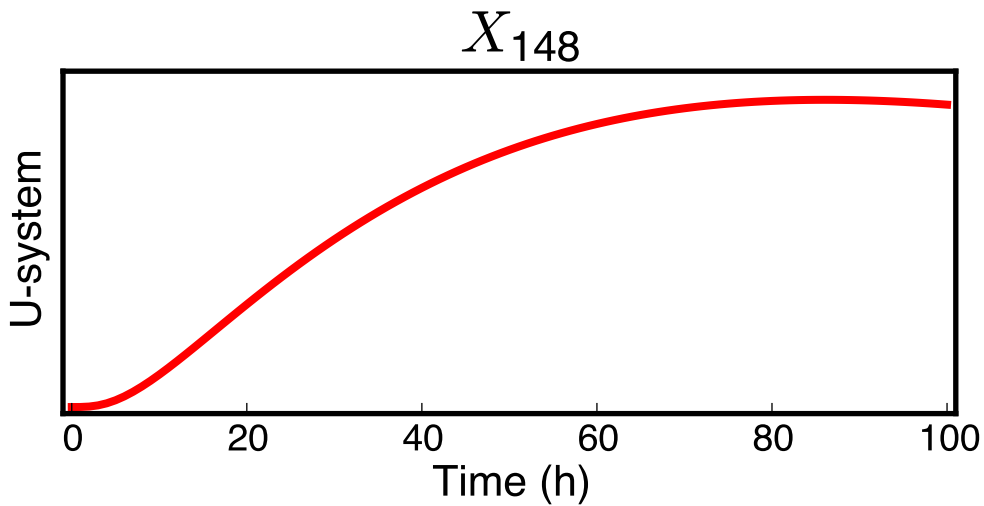

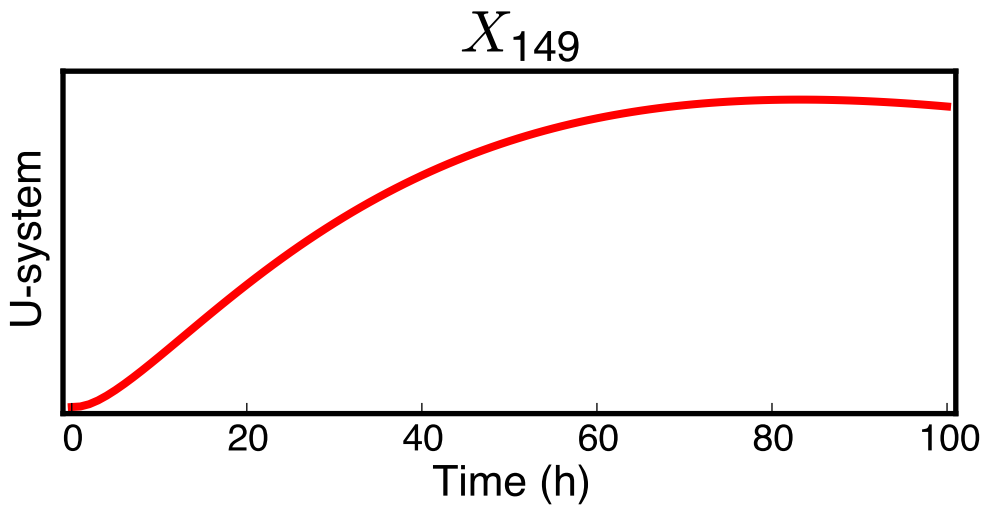

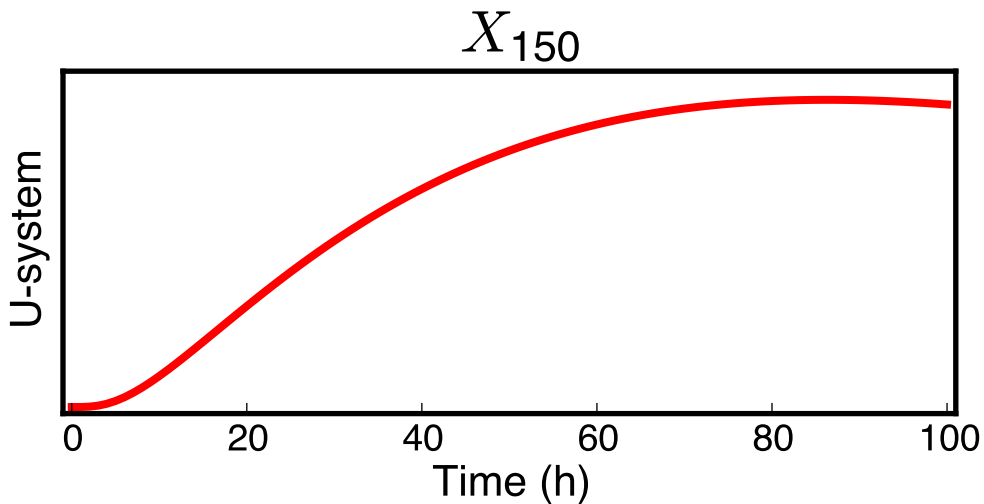

$X_{151}$

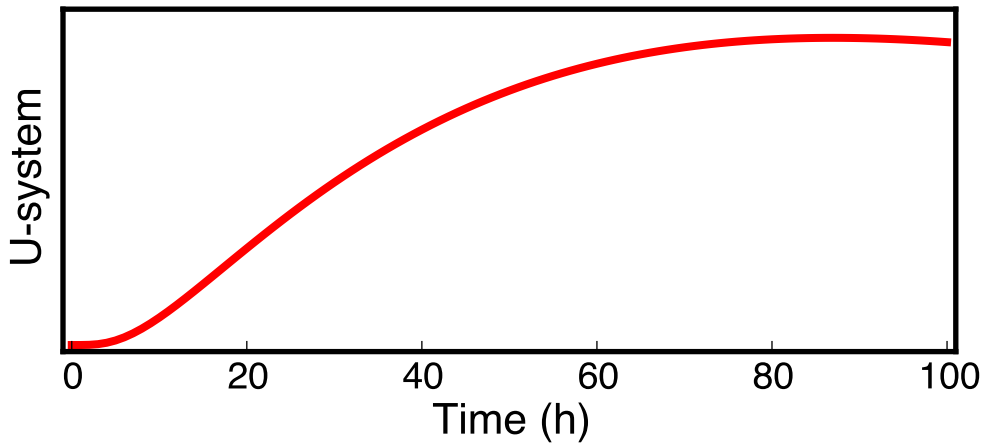

$X_{152}$

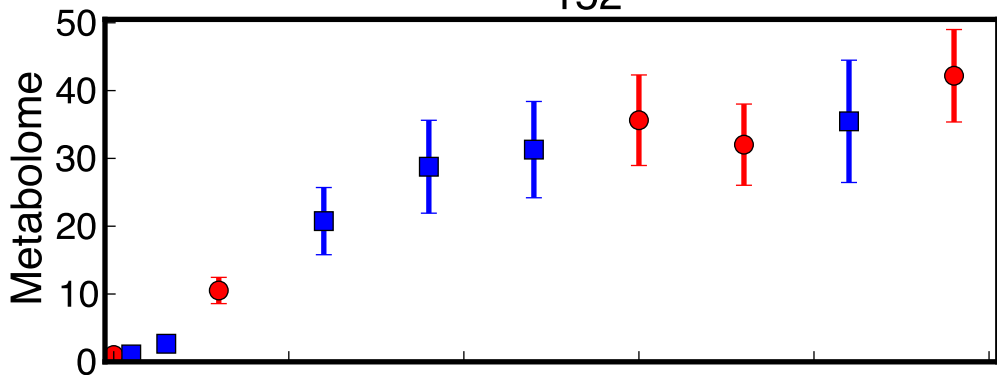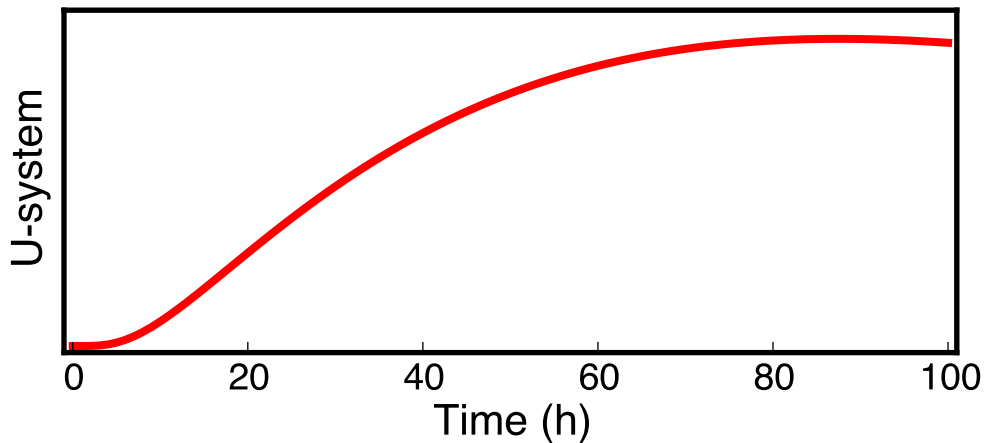



$X_{153}$

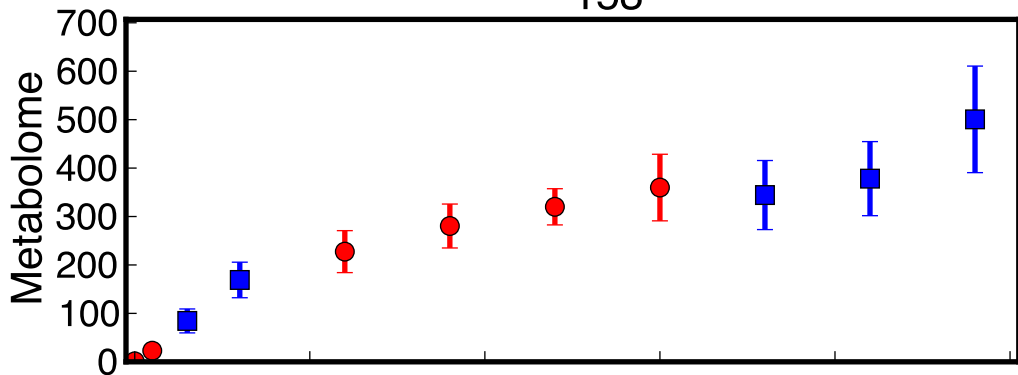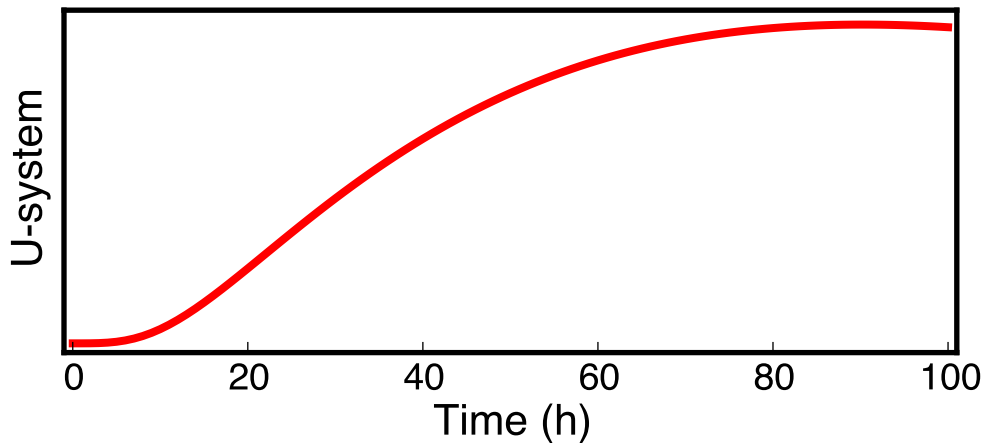

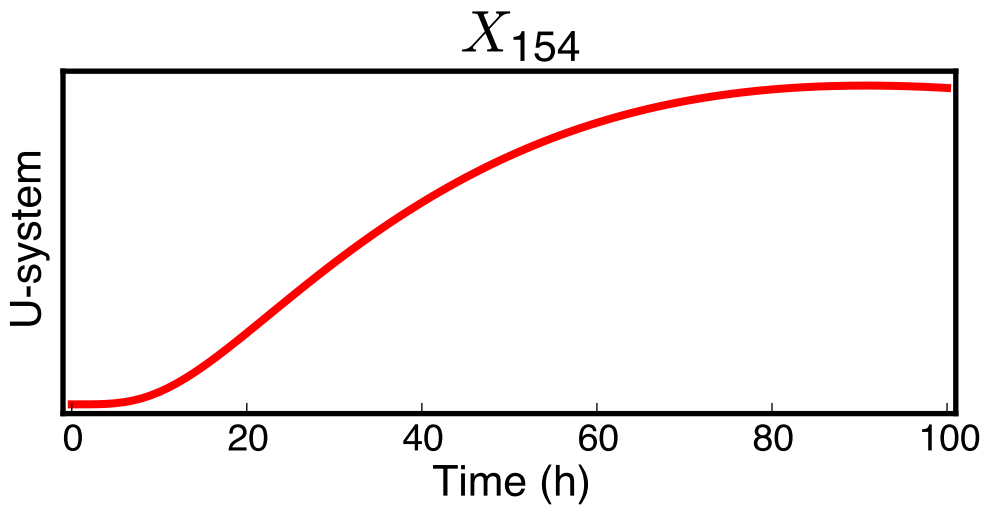

$X_{155}$

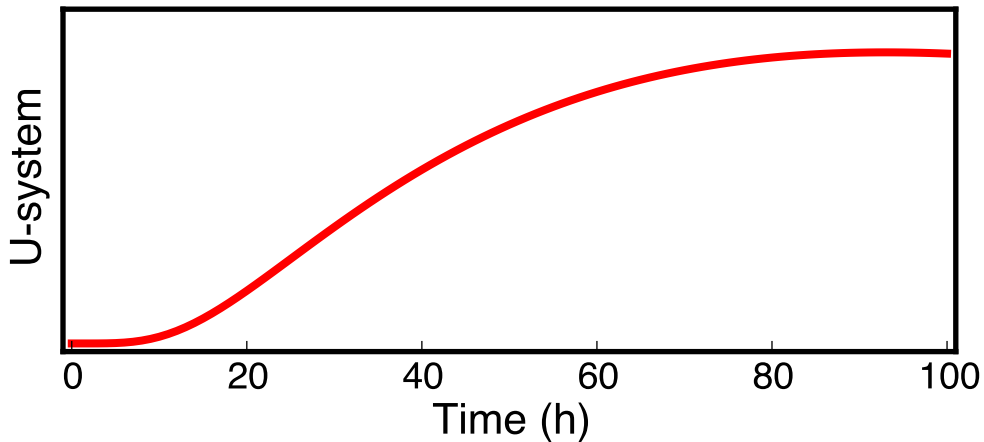

$X_{156}$

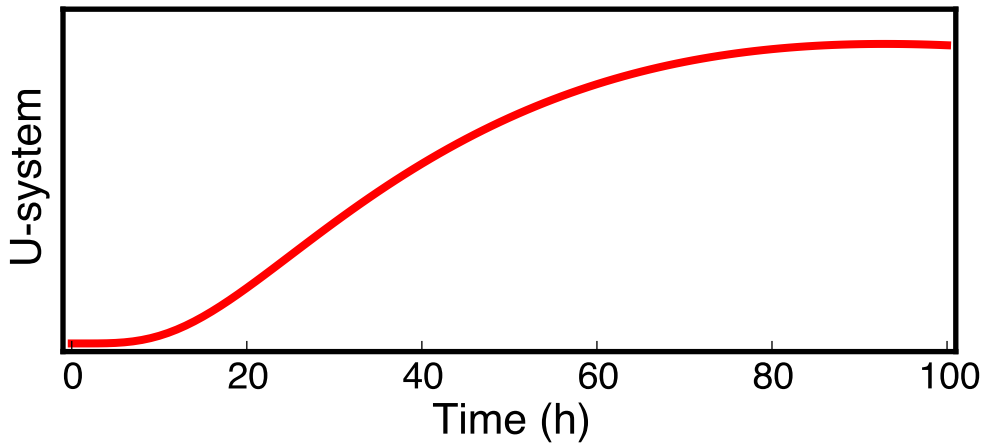

$X_{157}$

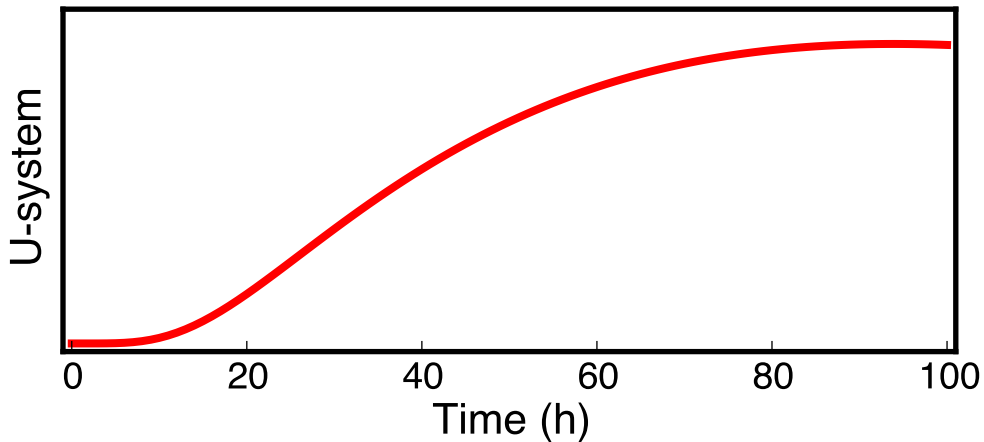

$X_{158}$

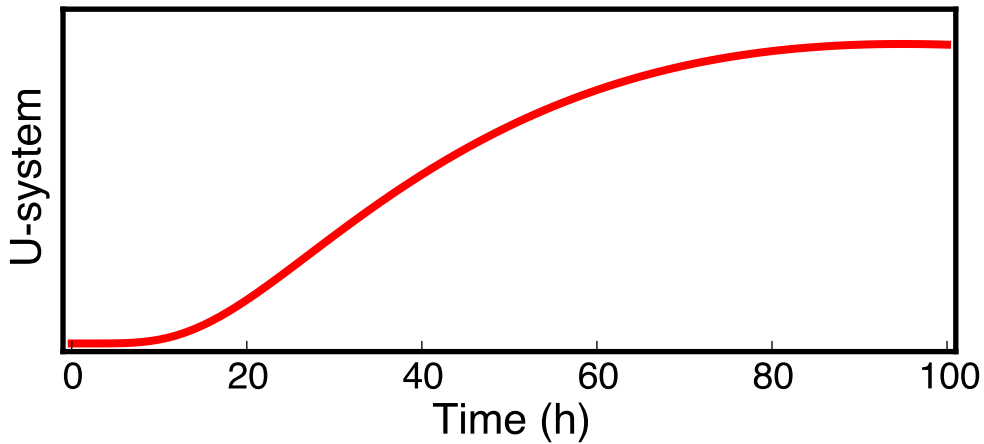

$X_{159}$

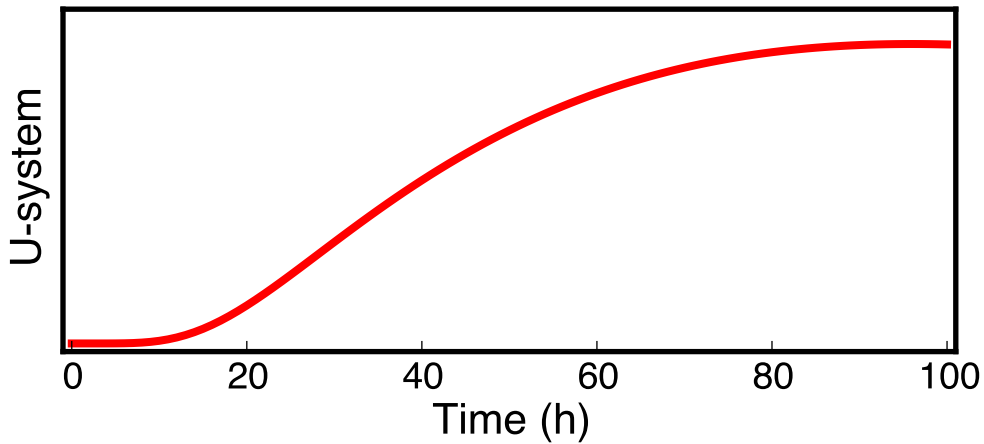

$X_{160}$

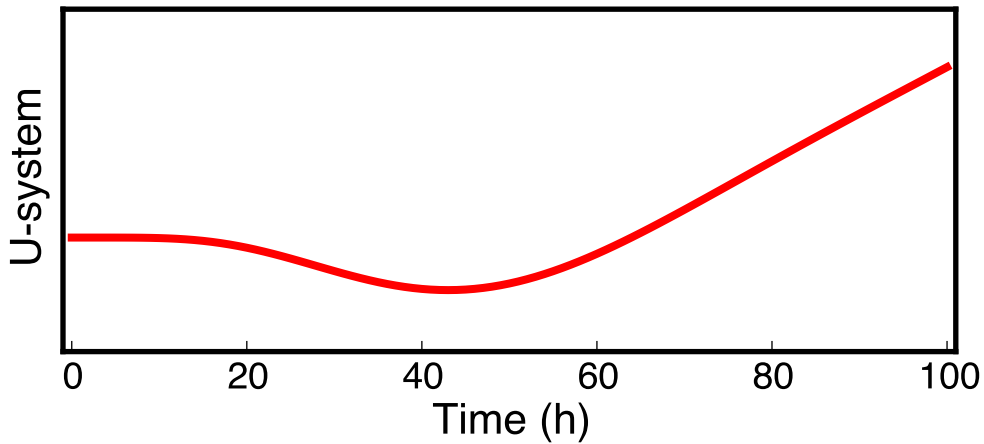



$X_{161}$

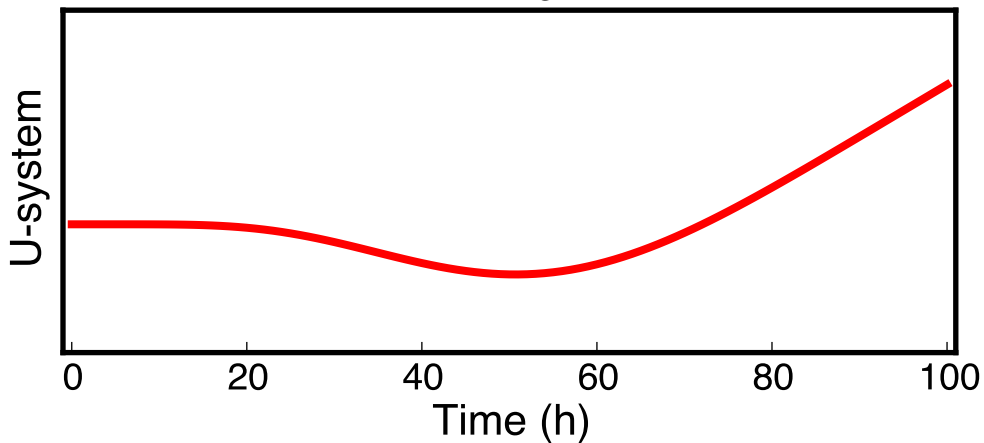

$X_{162}$

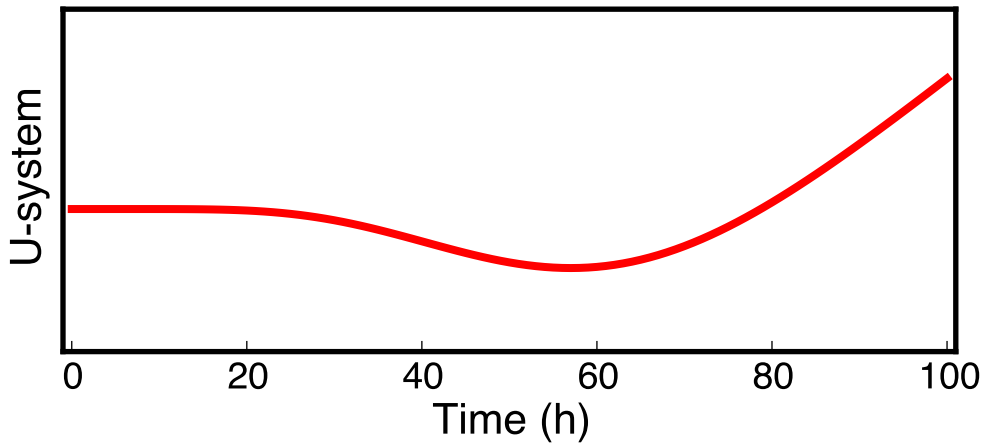

$X_{163}$

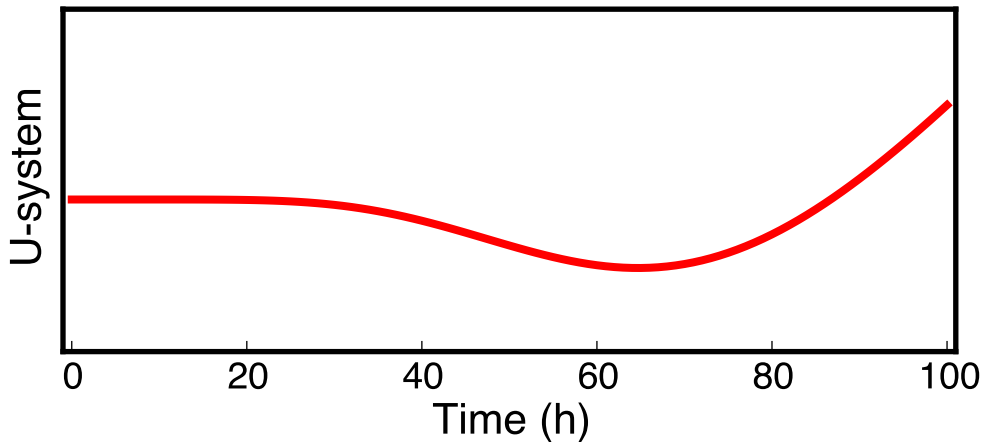

$X_{164}$

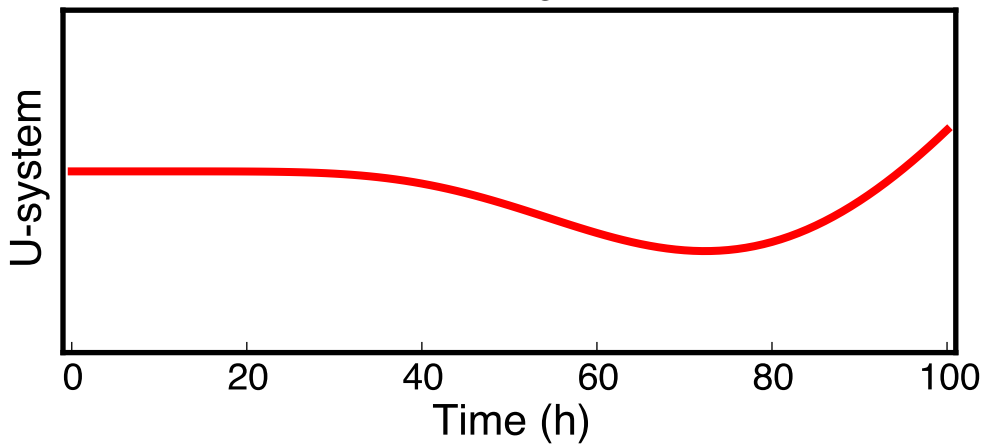

$X_{165}$

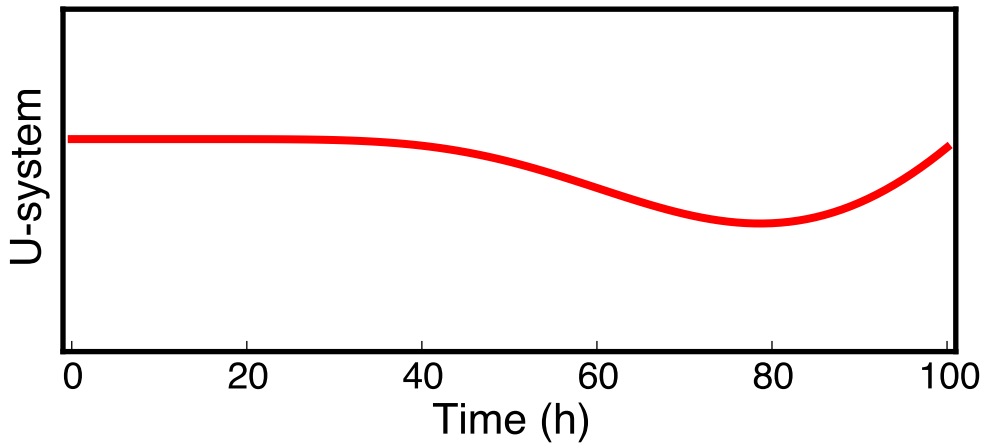

$X_{166}$

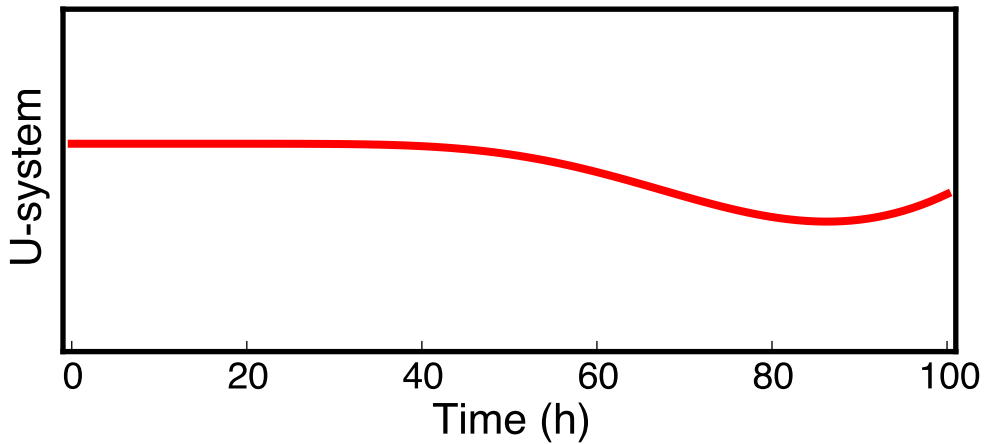

$X_{167}$

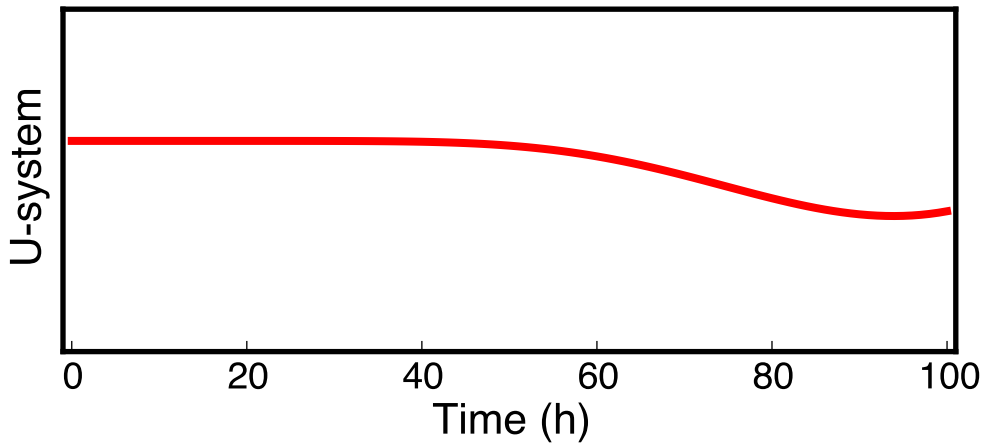

$X_{168}$

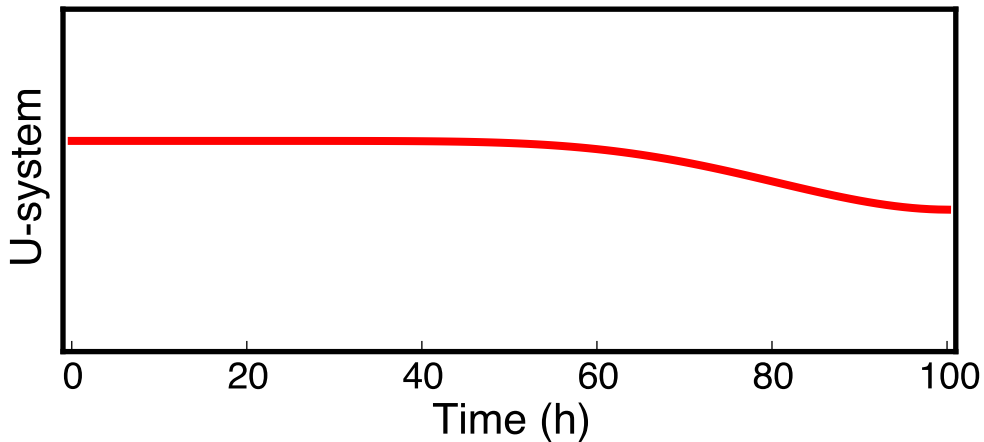



$X_{169}$

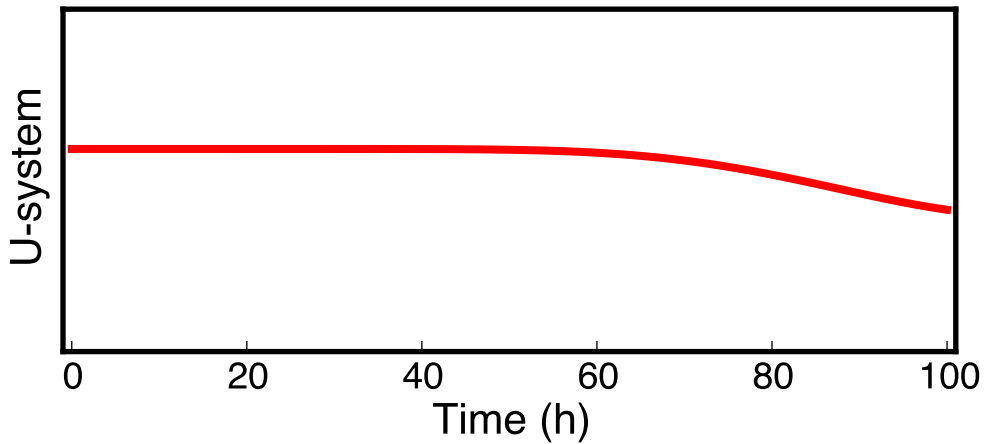

$X_{170}$

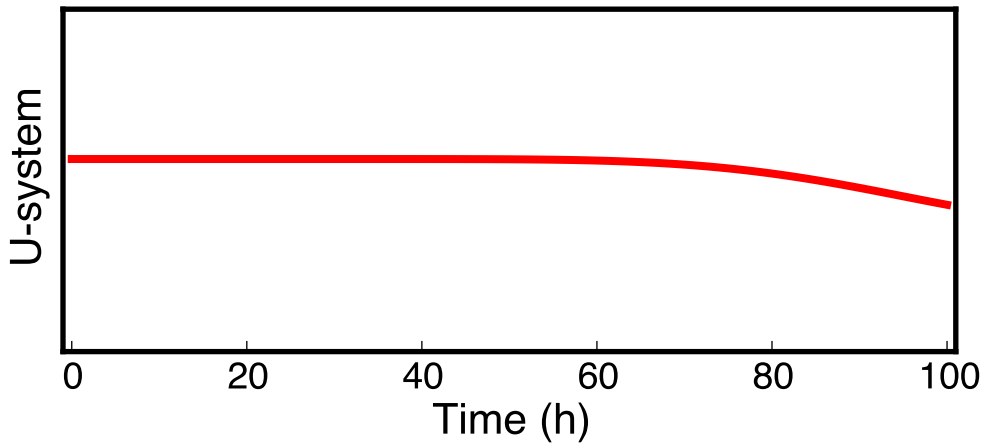

$X_{171}$

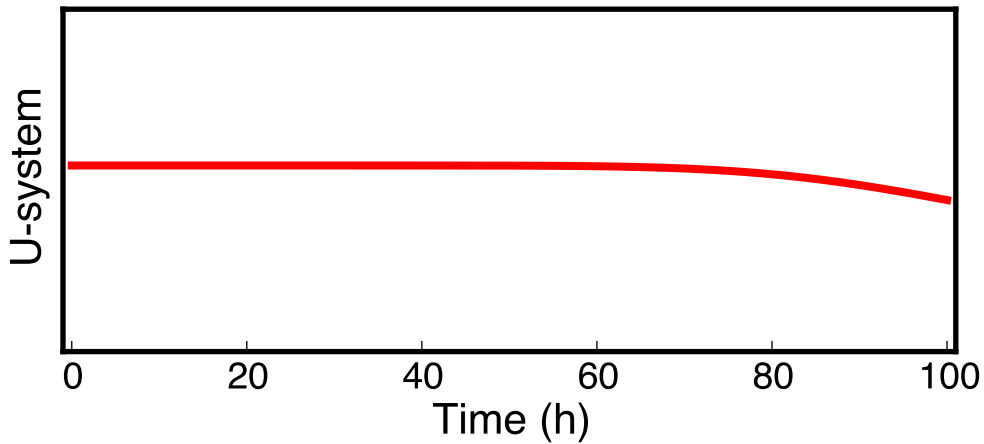

$X_{172}$

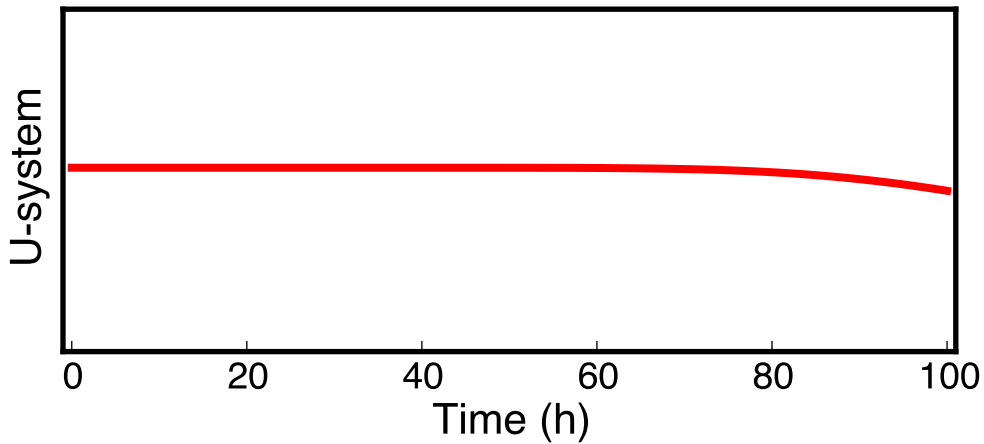

$X_{173}$

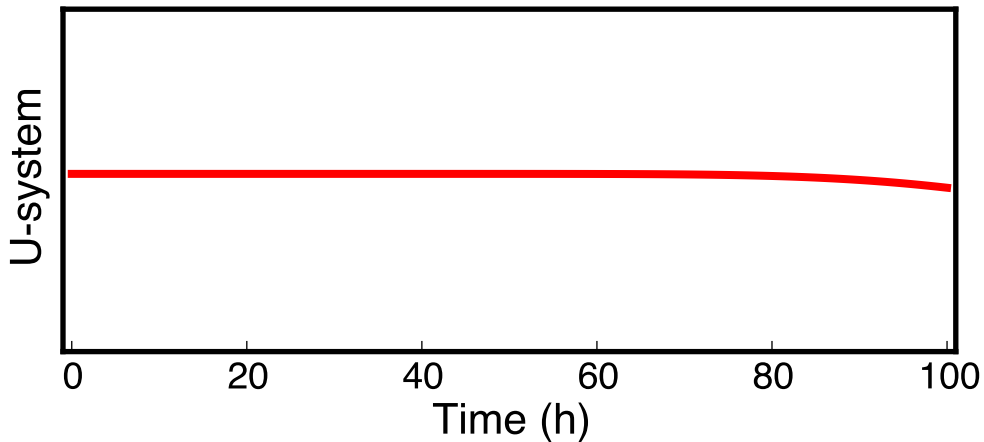

$X_{174}$

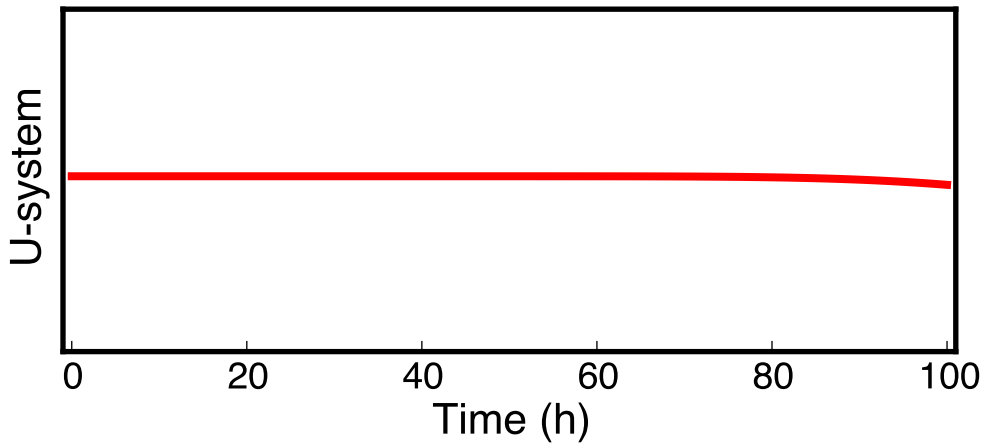

$X_{175}$

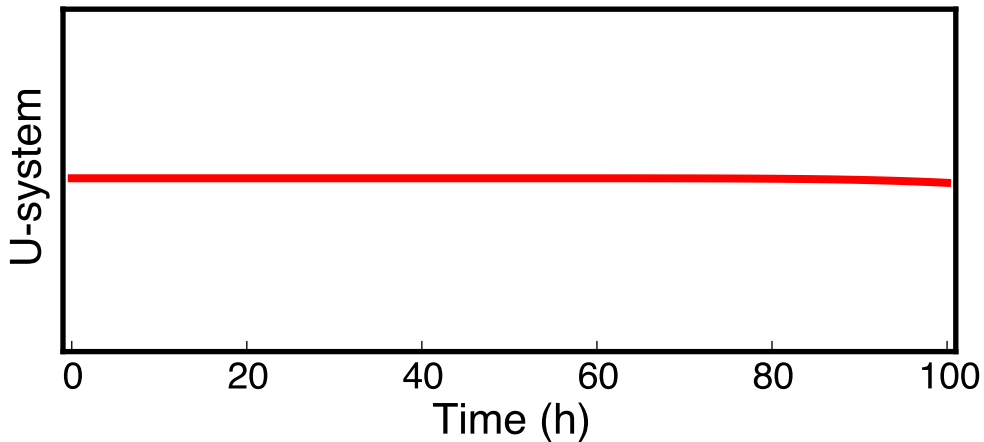

$X_{176}$

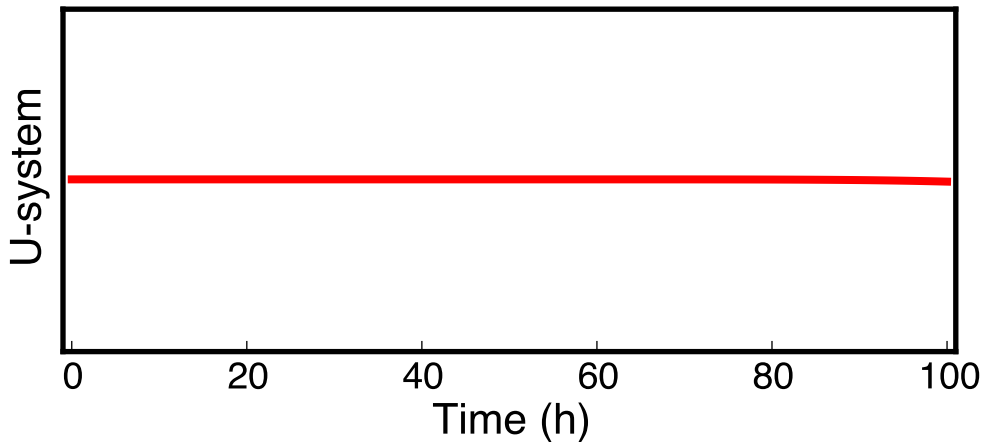



$X_{177}$

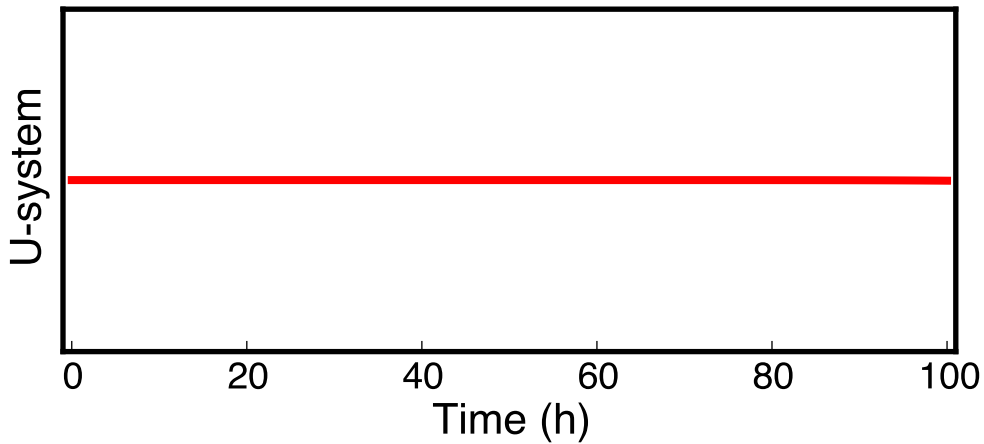

$X_{178}$

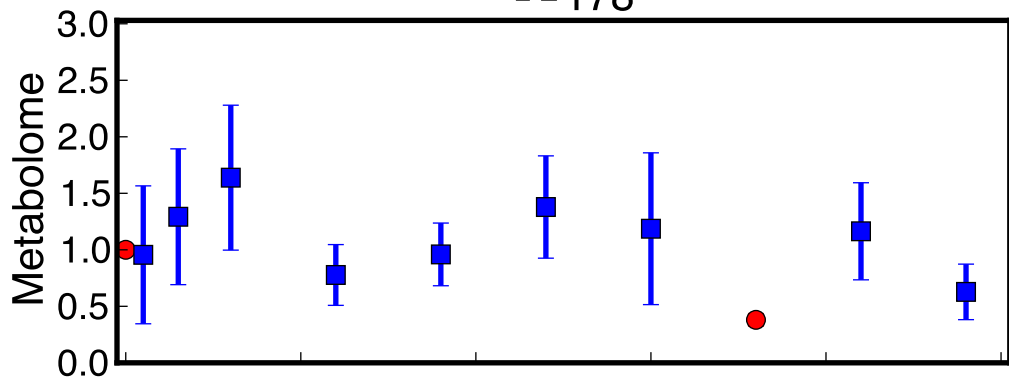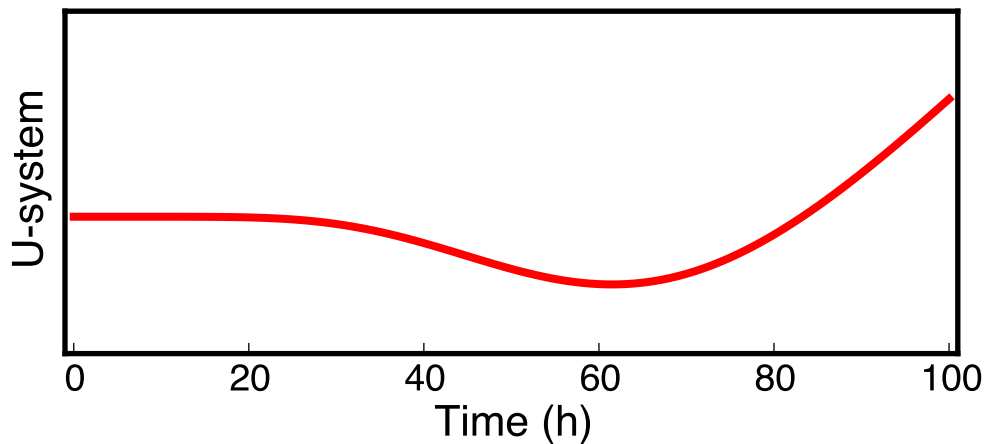

$X_{179}$

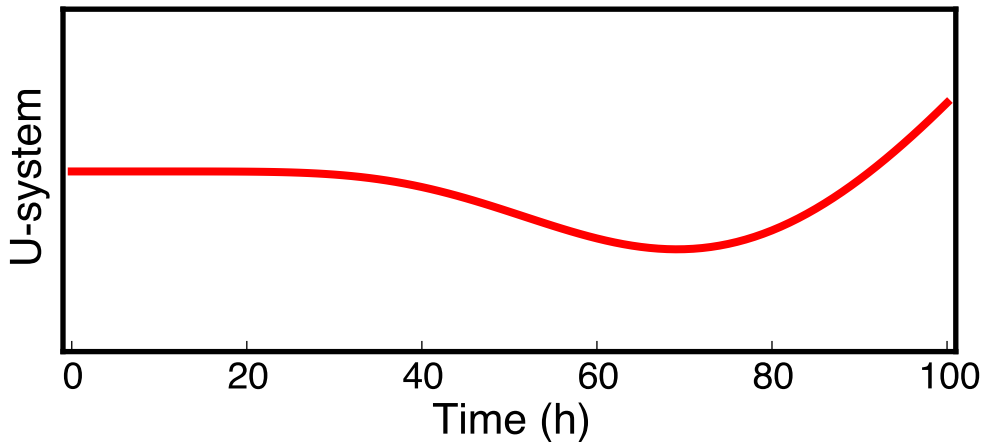

$X_{180}$

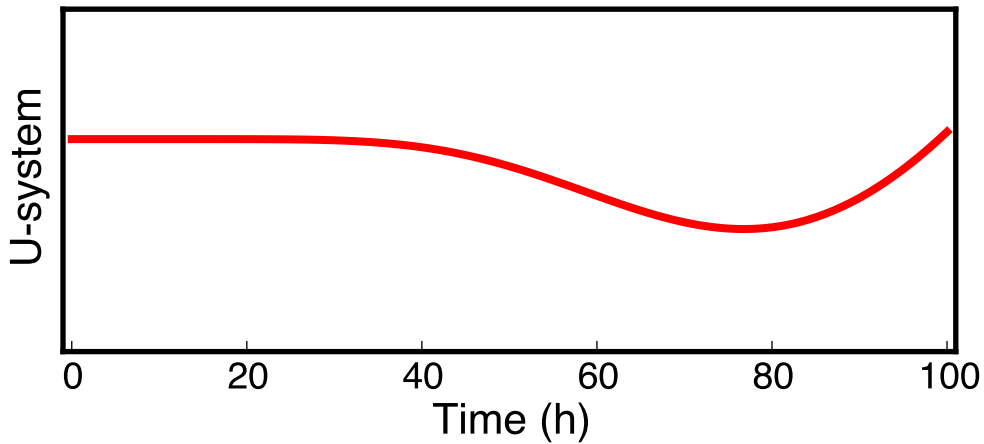

$X_{181}$

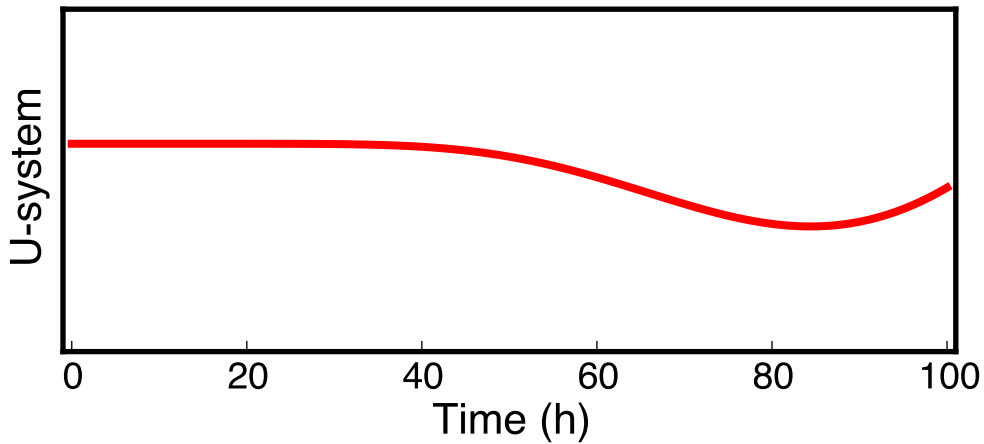

$X_{182}$

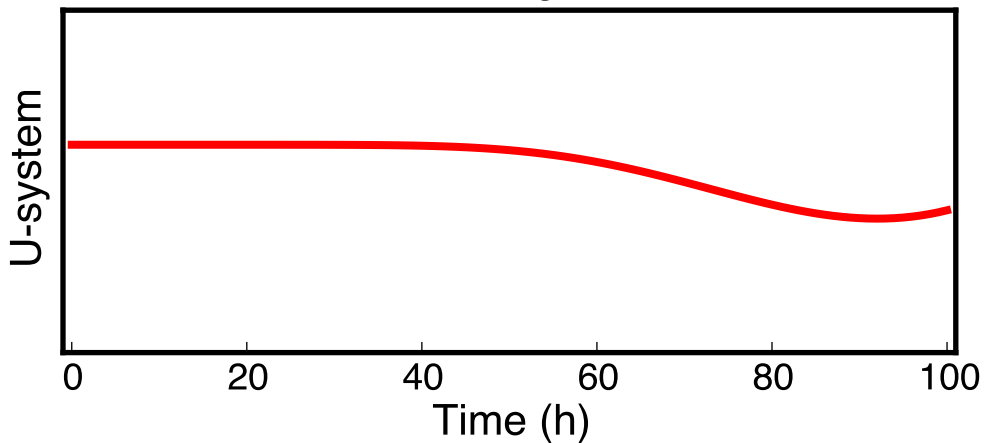

$X_{183}$

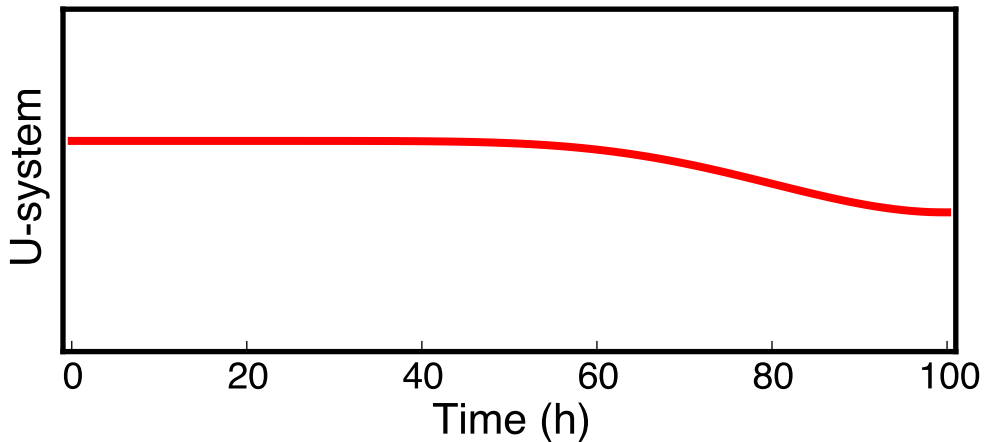

$X_{184}$

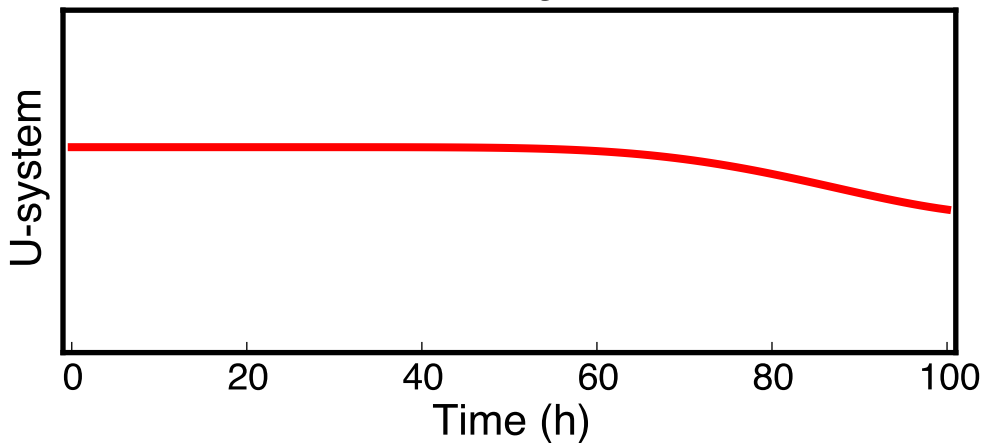



$X_{185}$

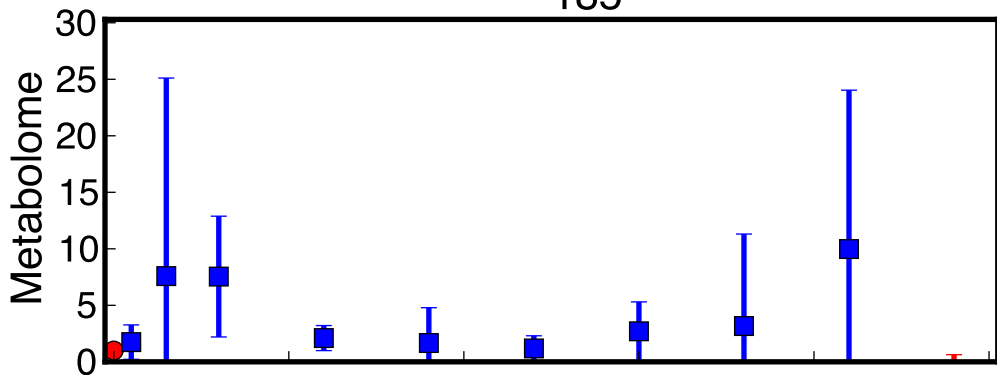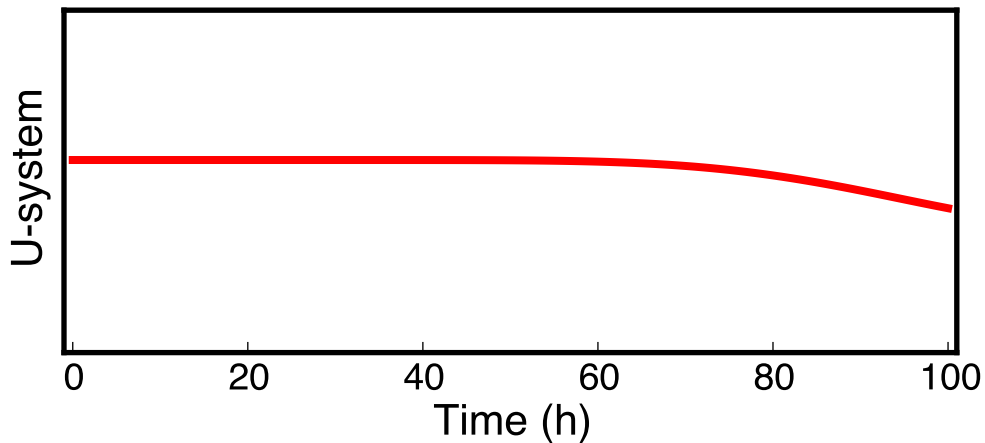

$X_{186}$

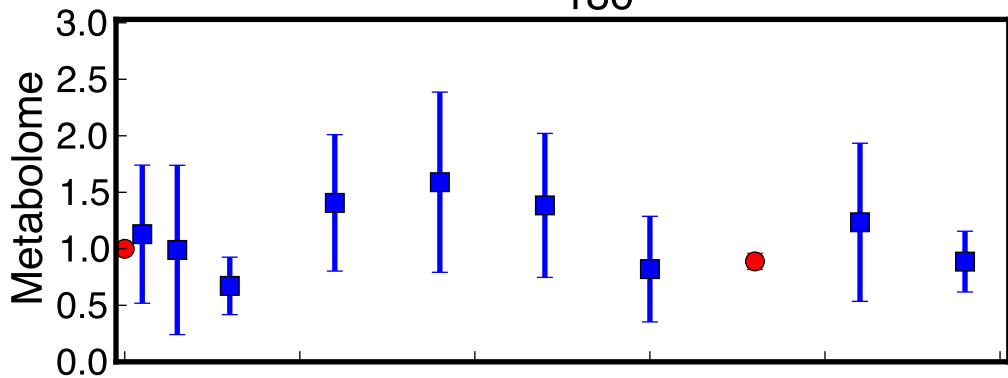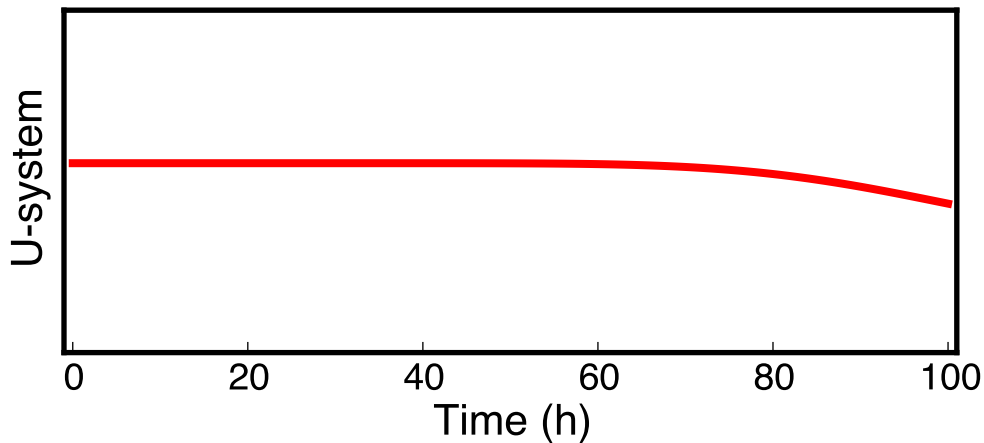

$X_{187}$

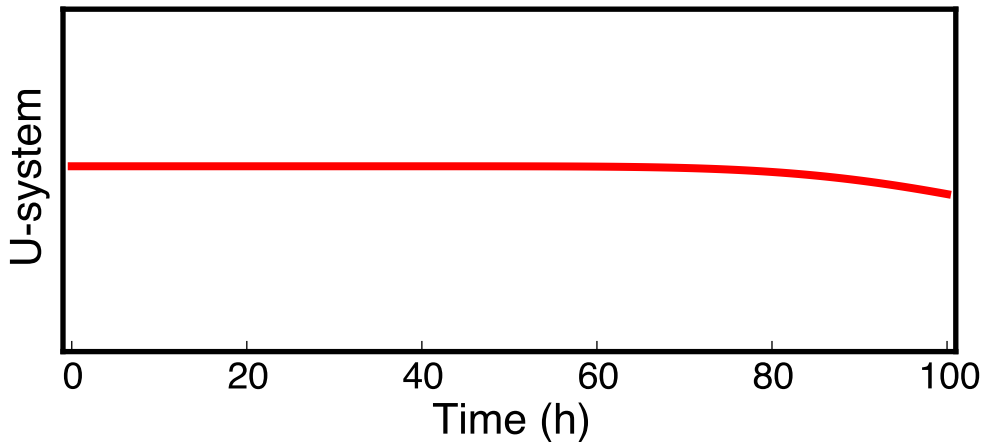

$X_{188}$

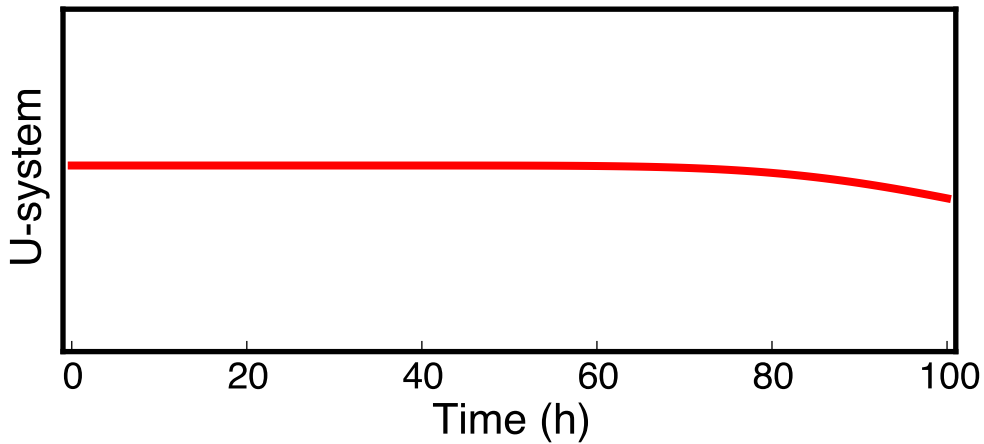

$X_{189}$

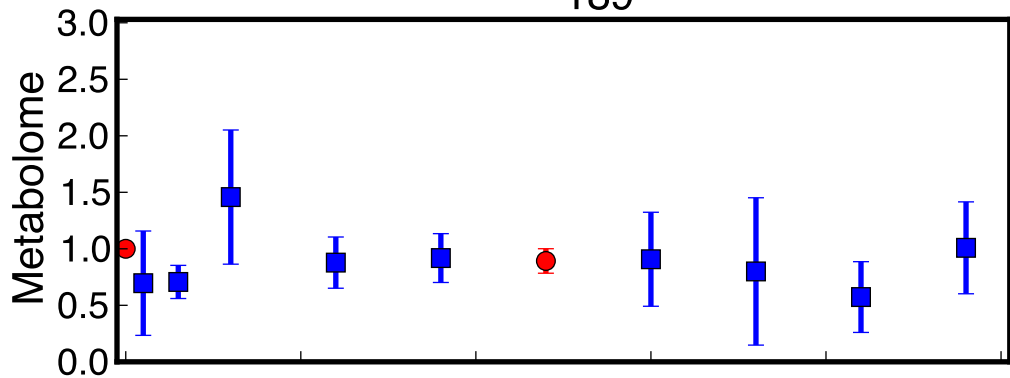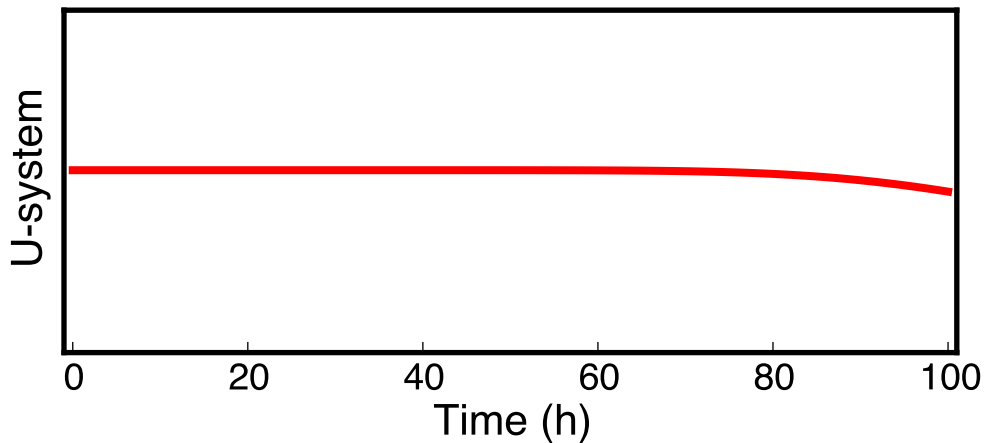

$X_{190}$

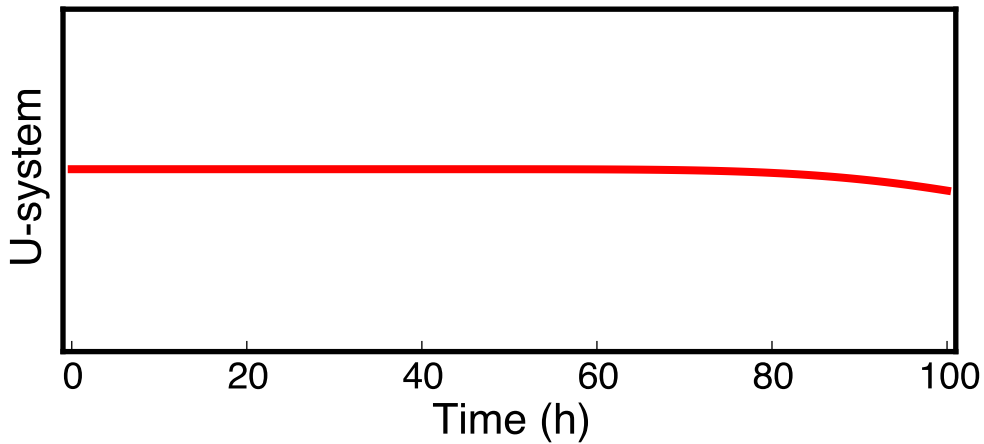

$X_{191}$

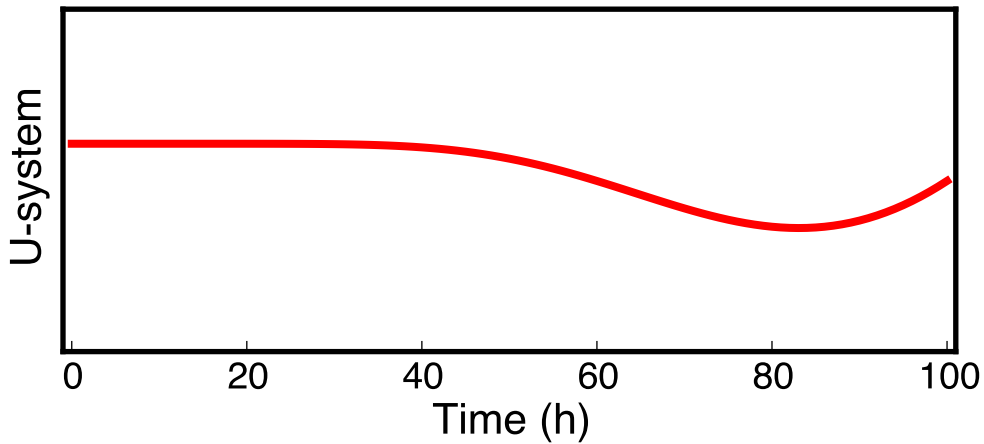

$X_{192}$

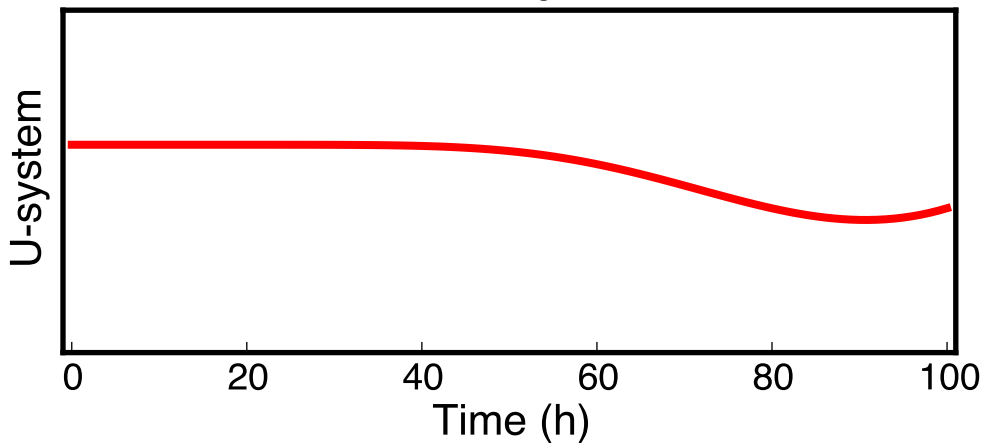



$X_{193}$

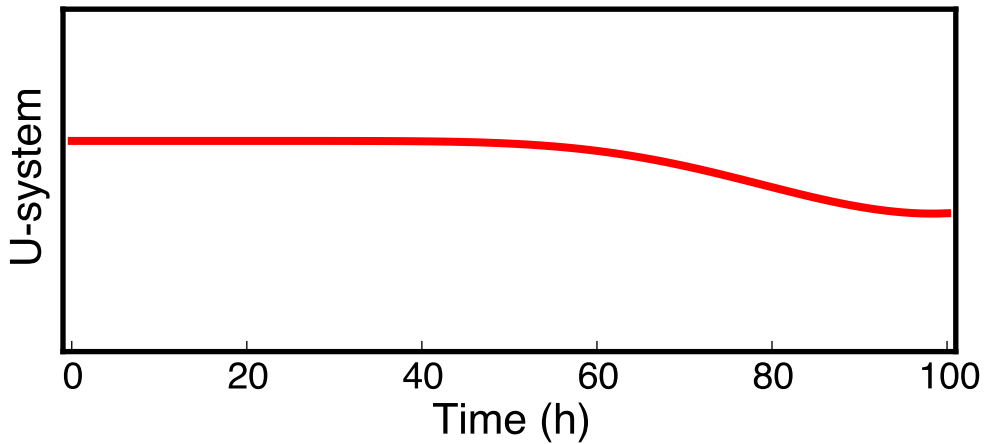

$X_{194}$

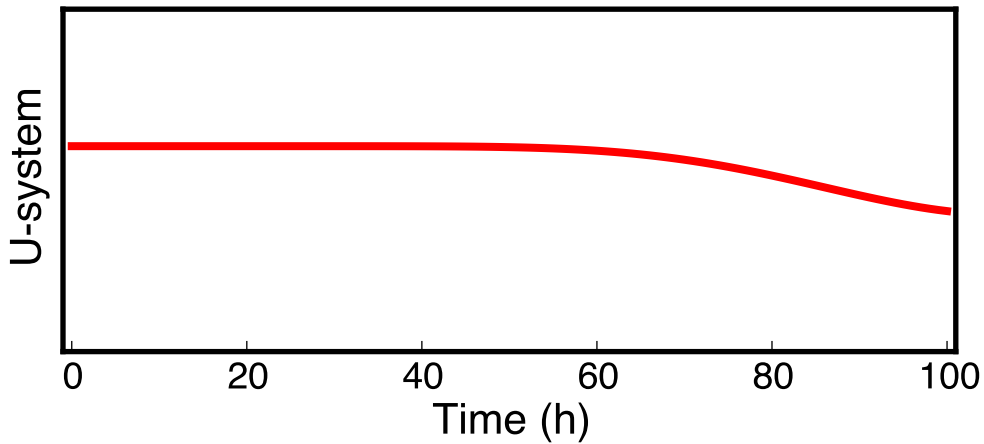

$X_{195}$

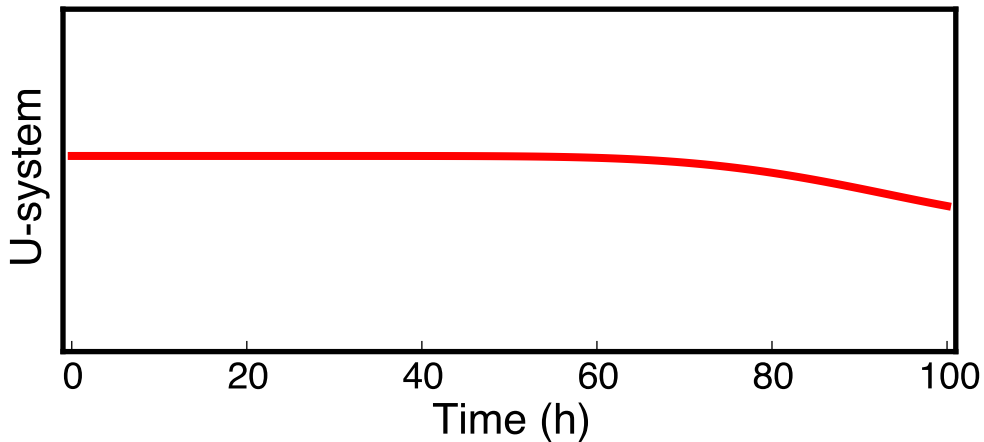

$X_{196}$

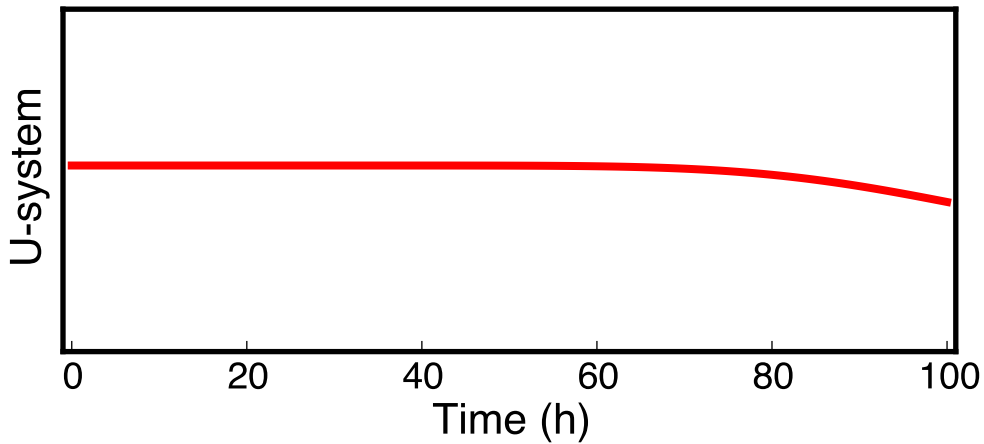

$X_{197}$

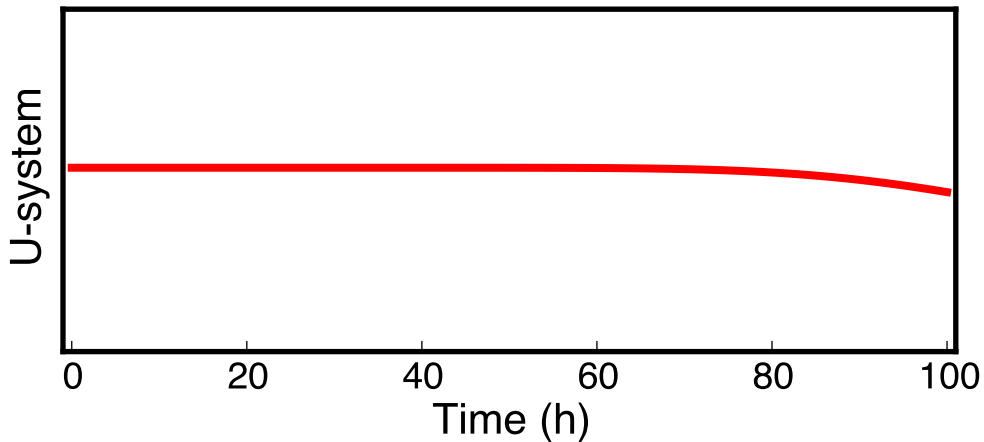

$X_{198}$

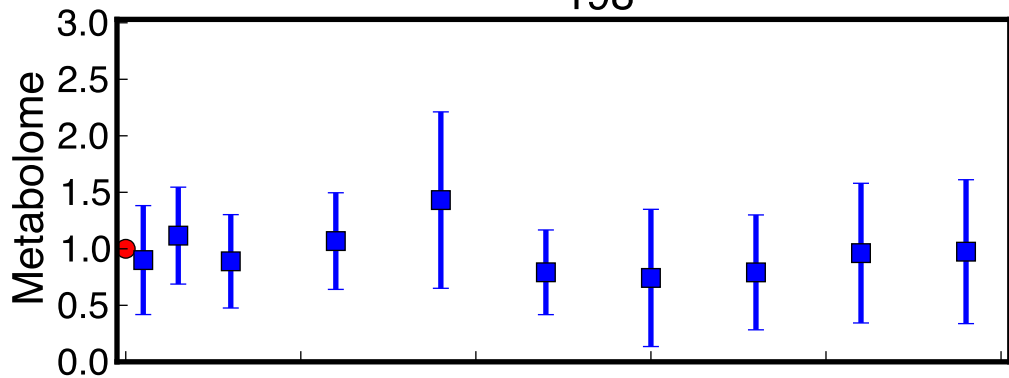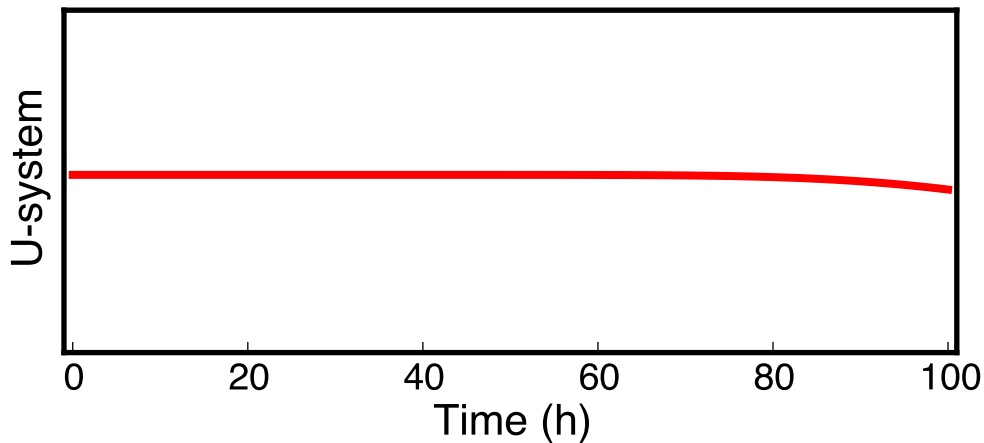

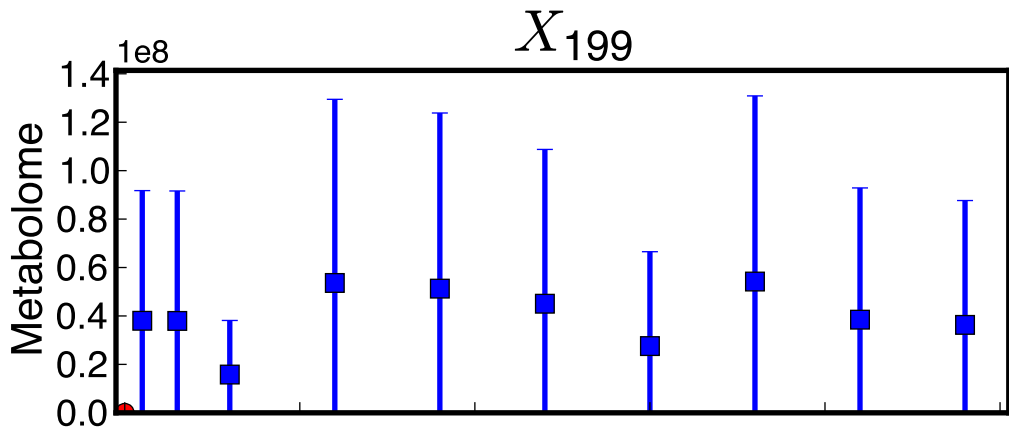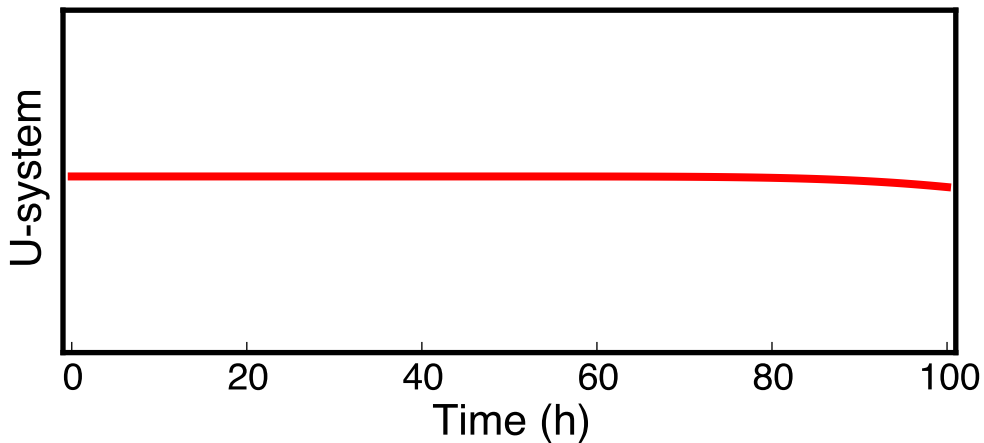

$X_{200}$

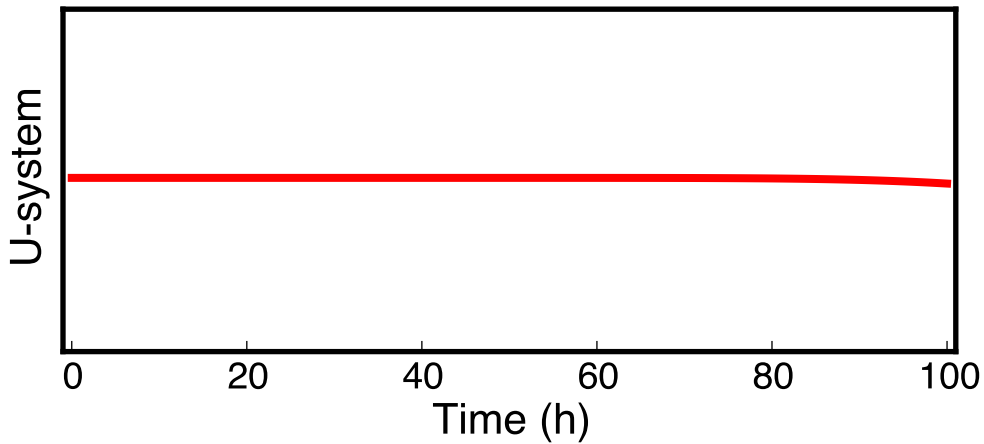



$X_{201}$

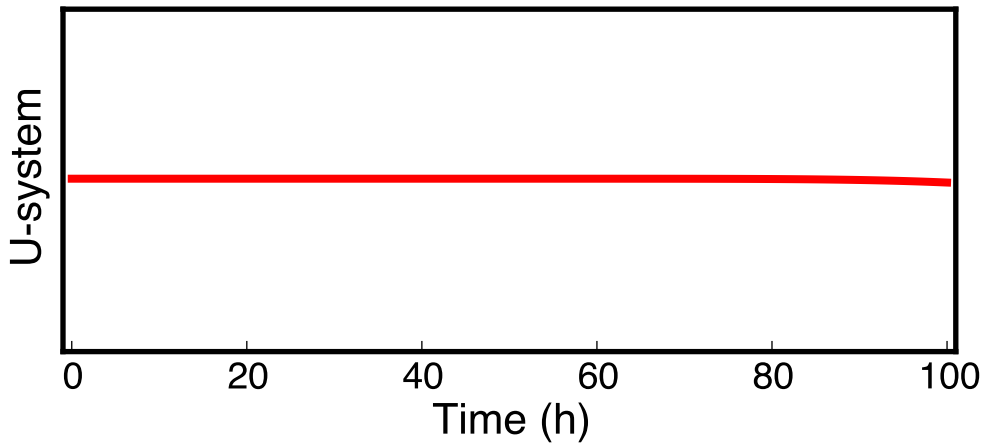

$X_{202}$

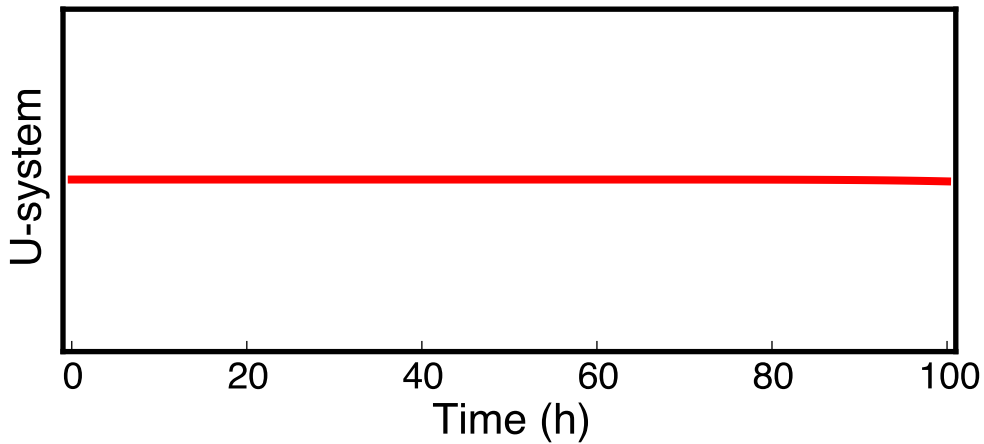

$X_{203}$



$X_{204}$

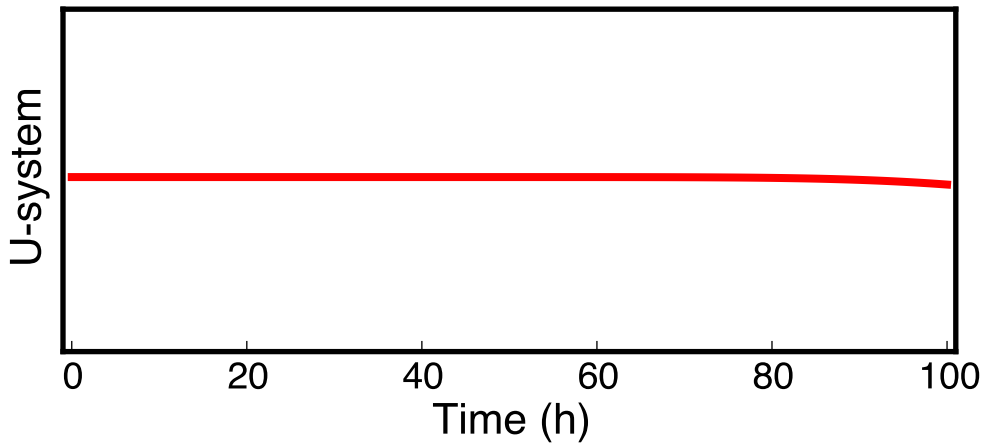

$X_{205}$



$X_{206}$

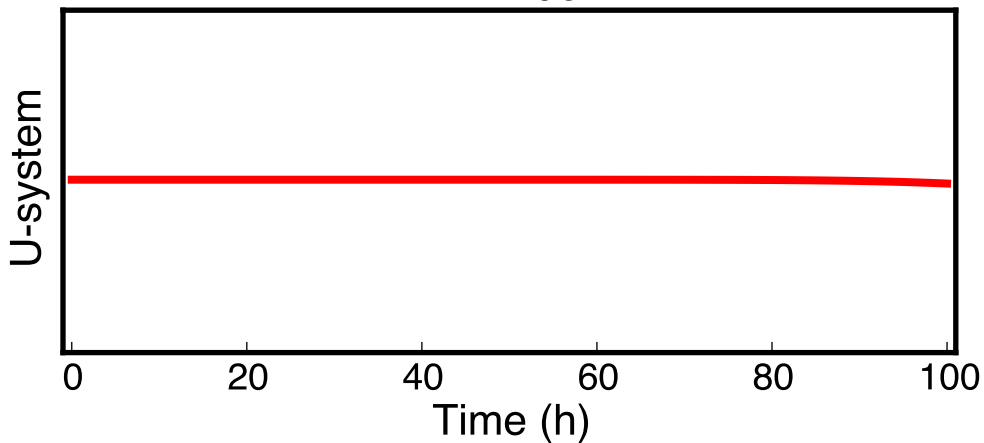

$X_{207}$

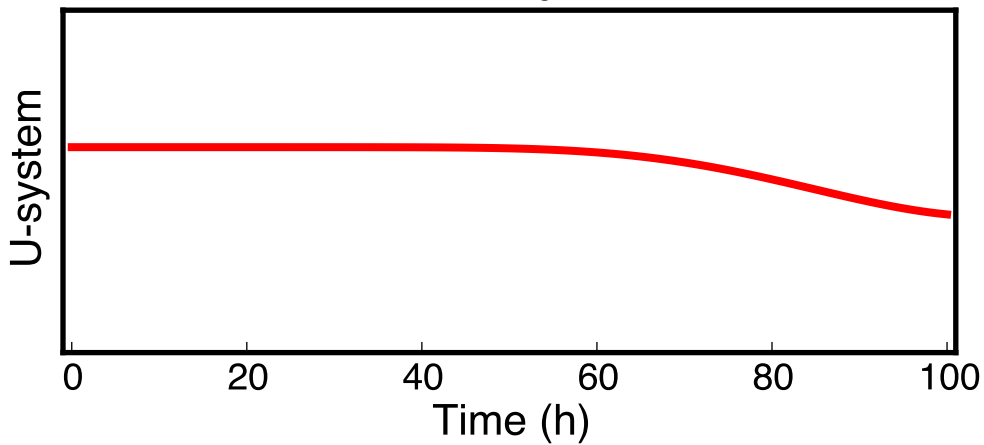

$X_{208}$

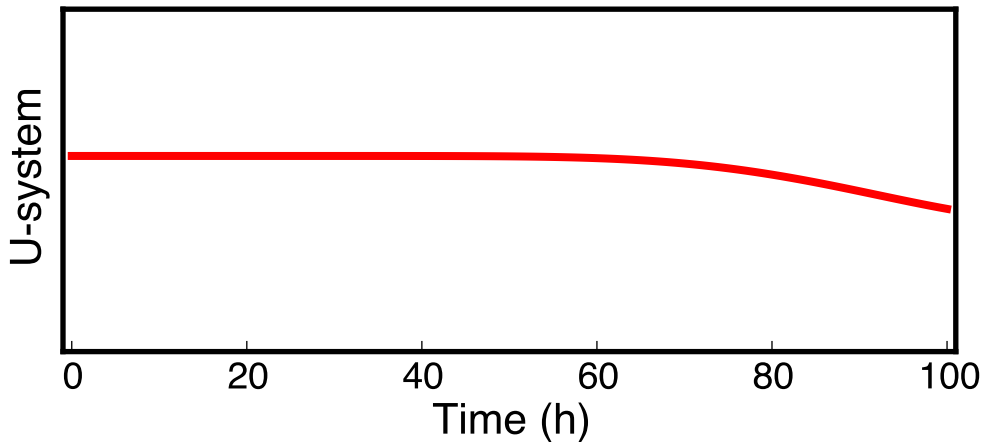



$X_{209}$

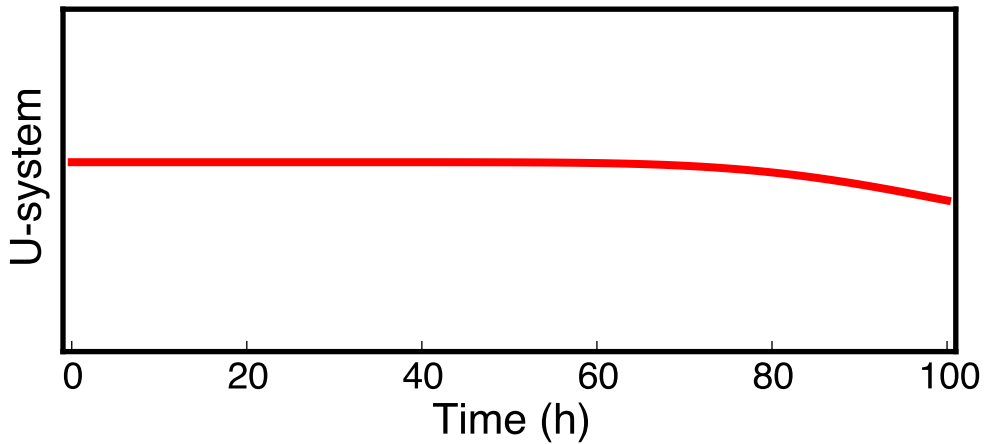

$X_{210}$

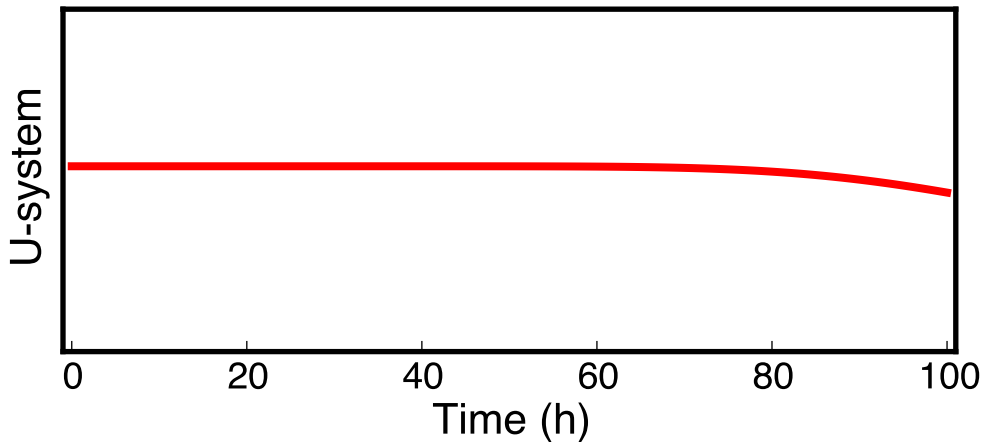

$X_{211}$

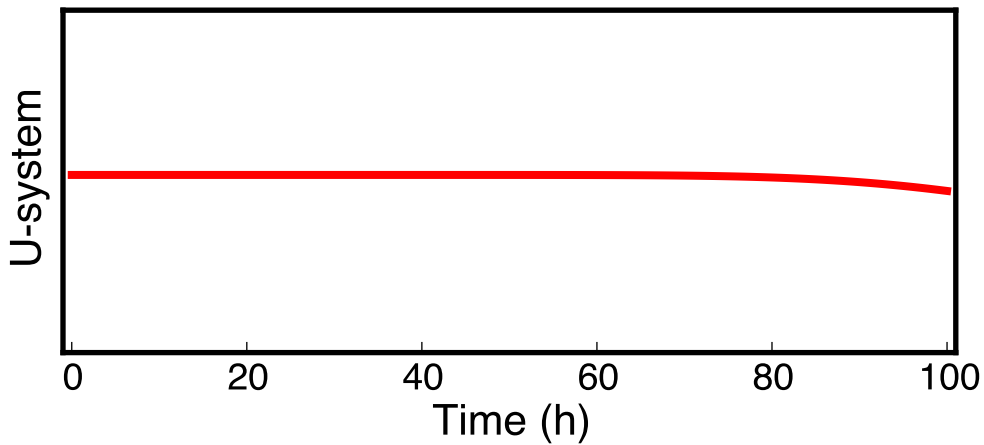

$X_{212}$

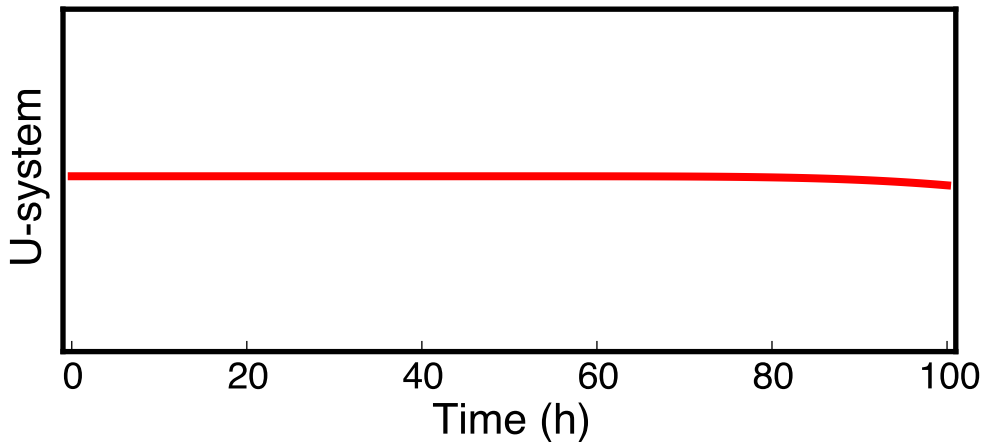

$X_{213}$

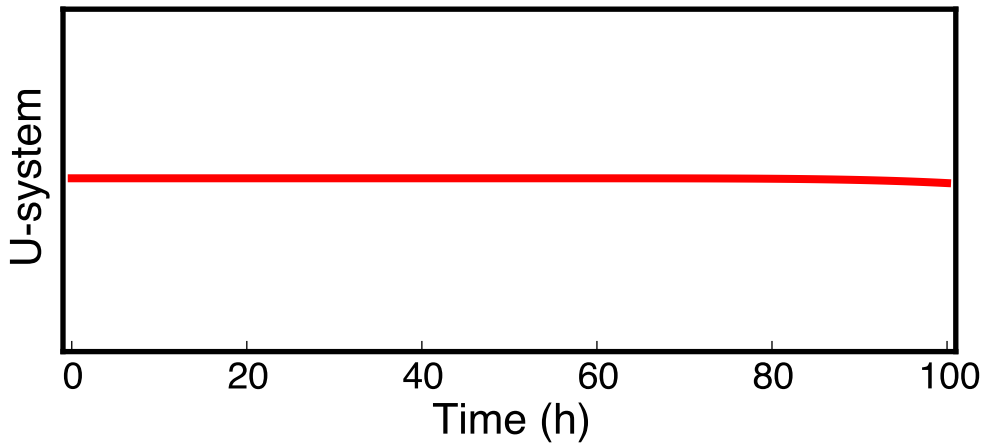

$X_{214}$

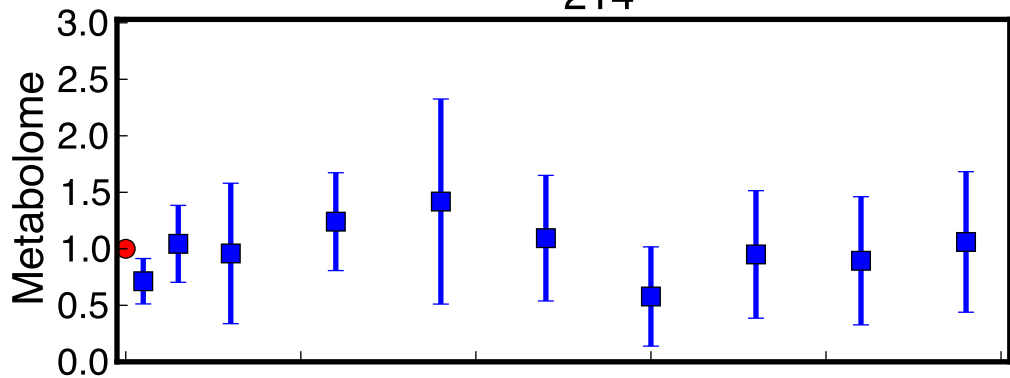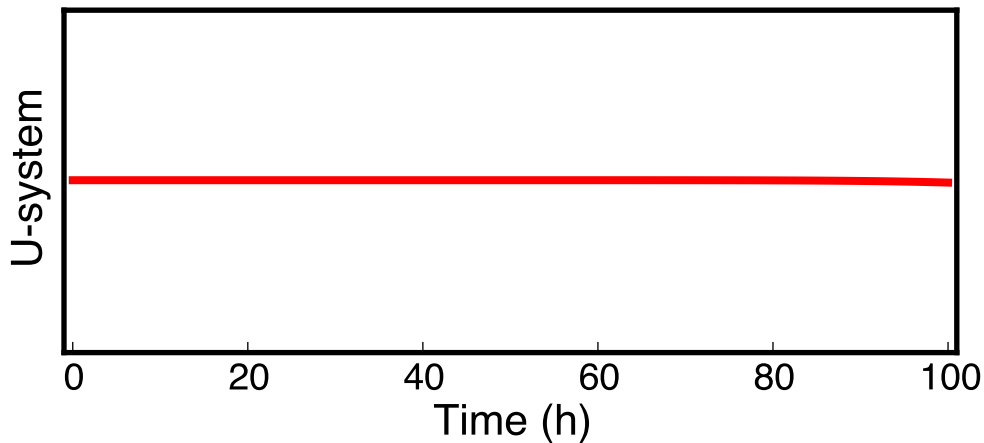

$X_{215}$

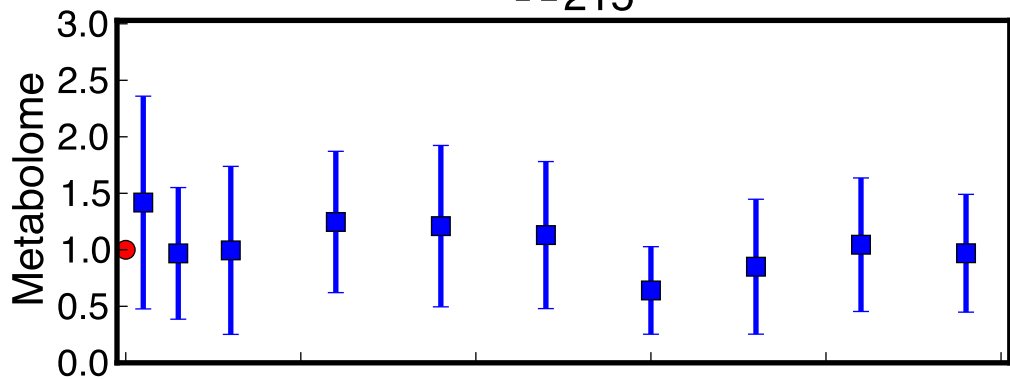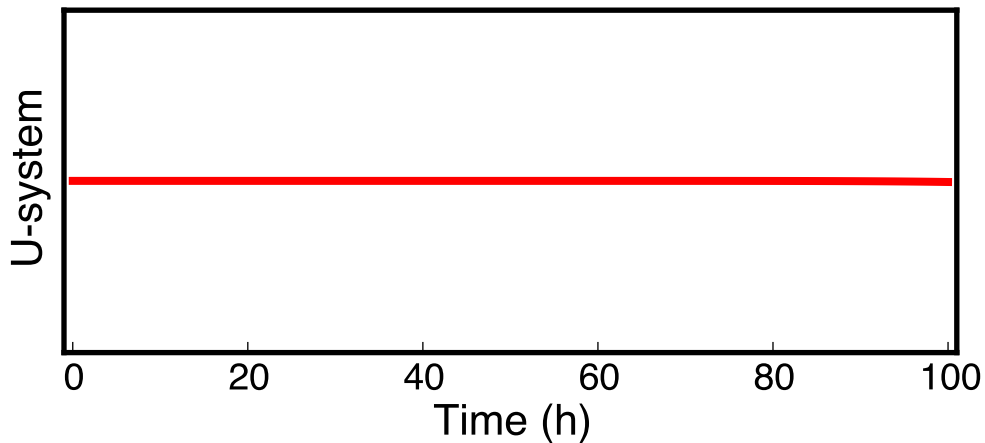

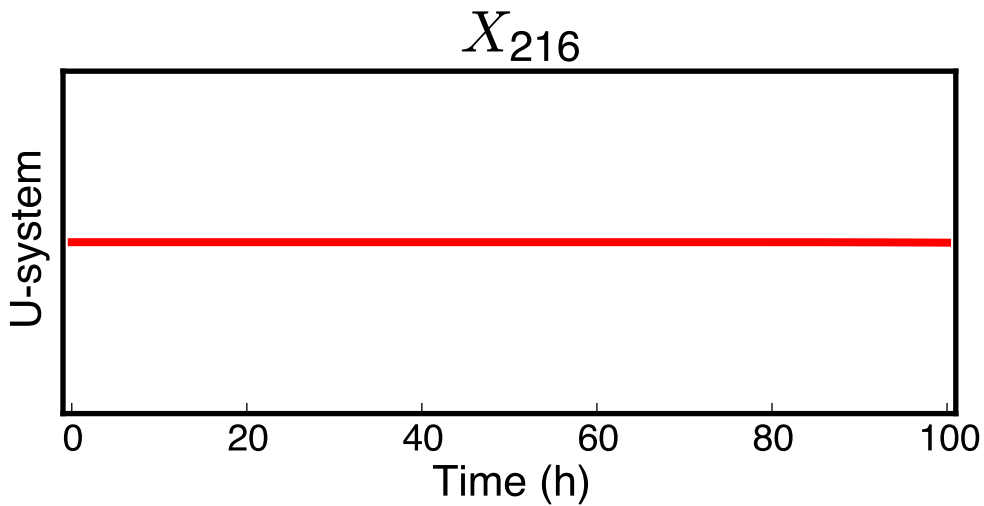



$X_{217}$

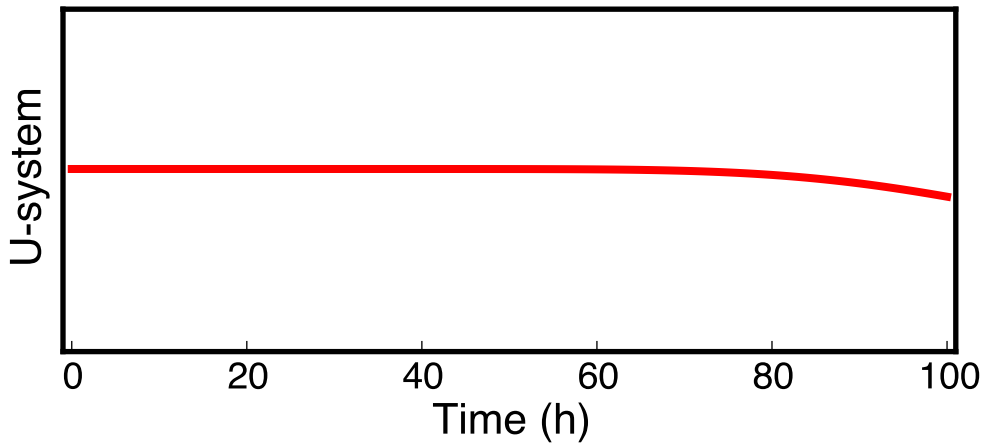

$X_{218}$

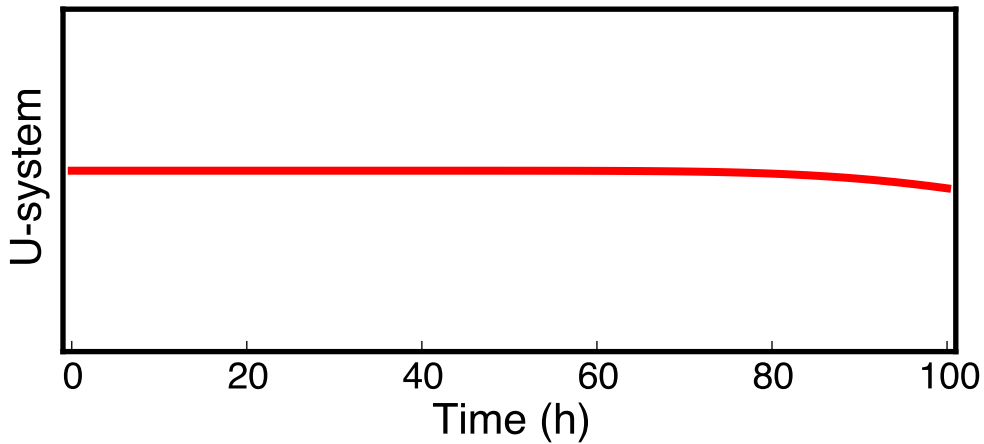

$X_{219}$

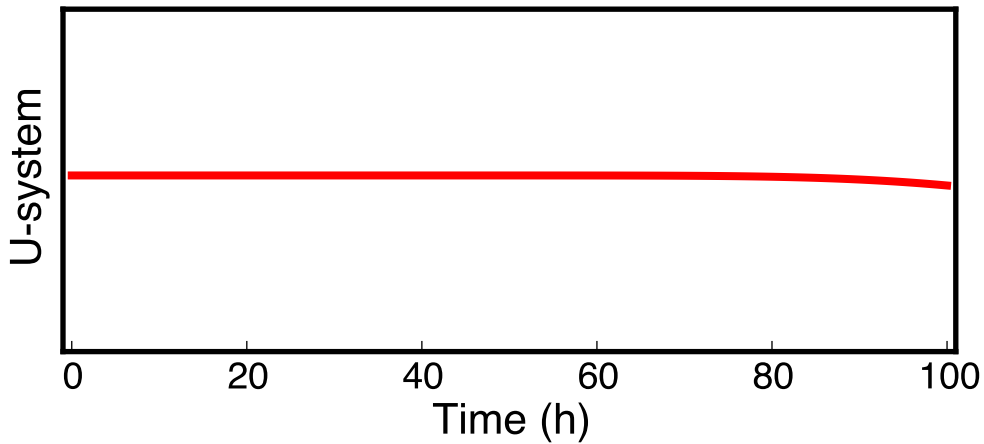

$X_{220}$

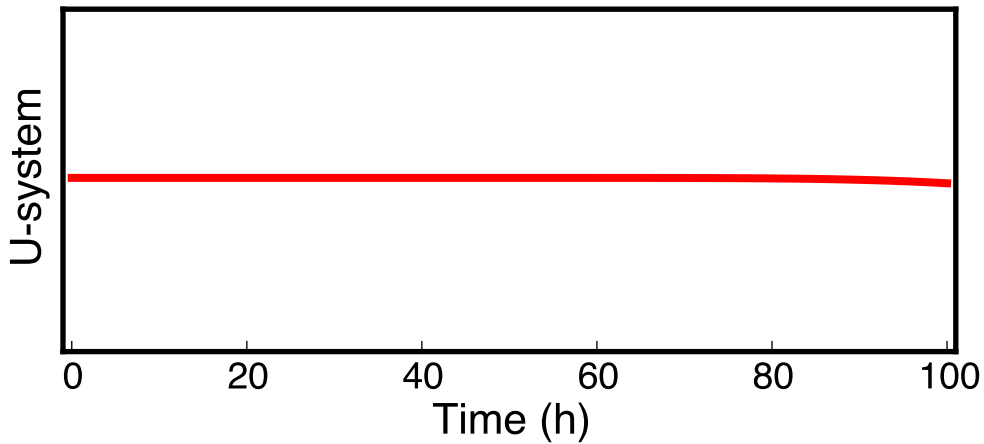

$X_{221}$

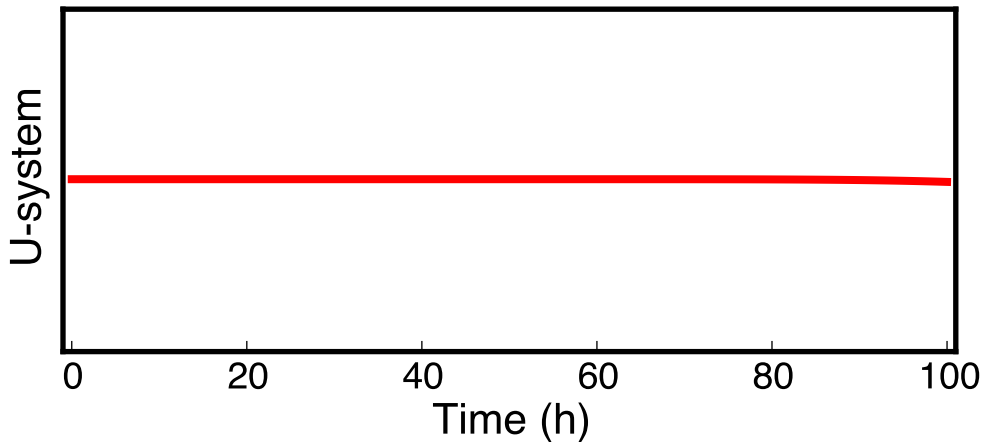

$X_{222}$

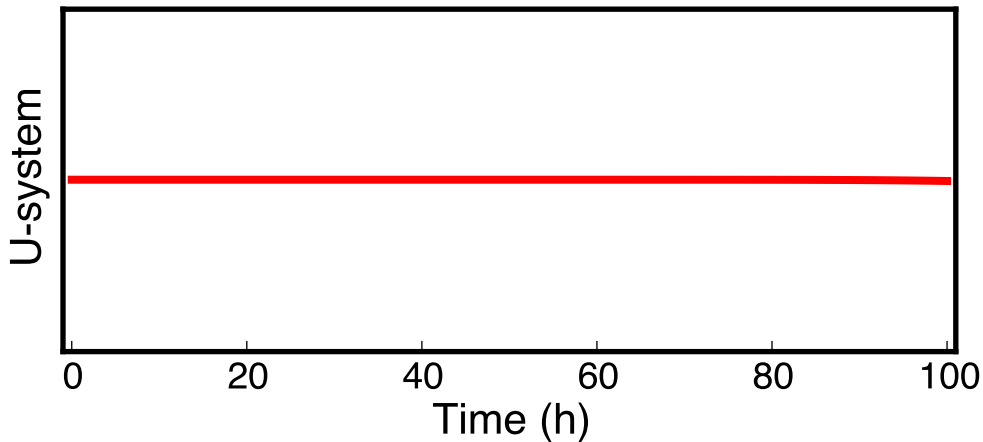

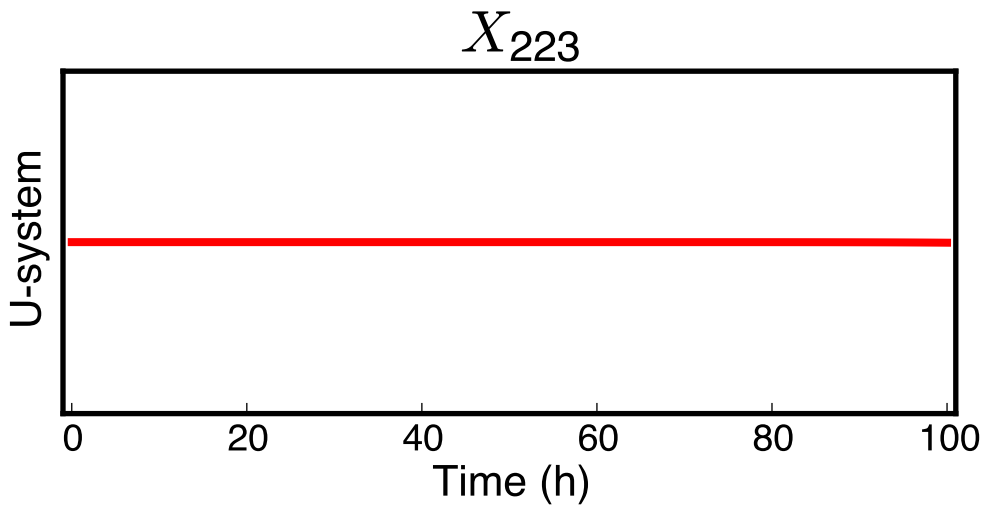

$X_{224}$

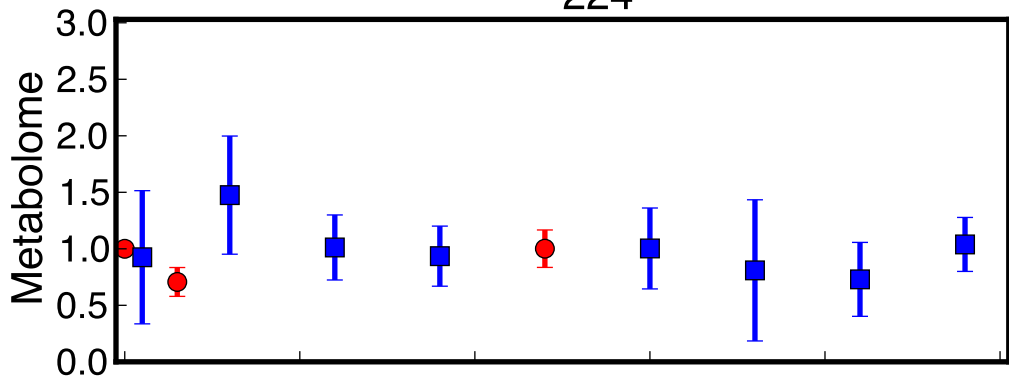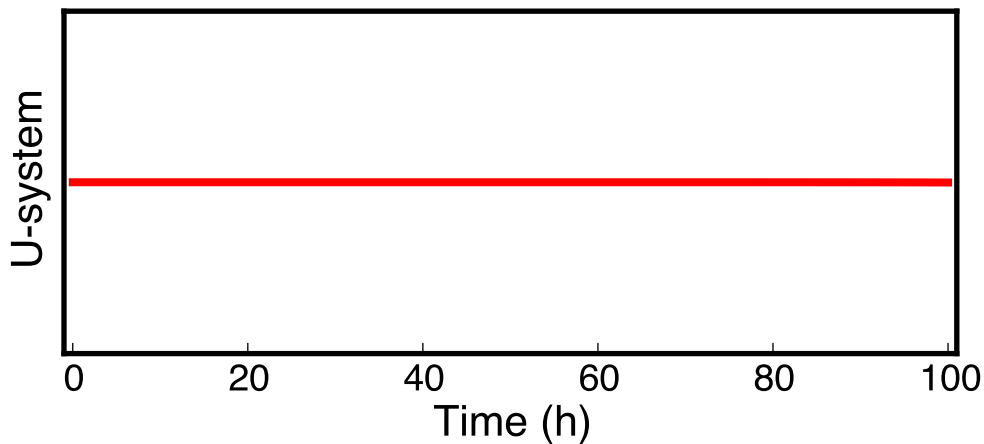



$X_{225}$

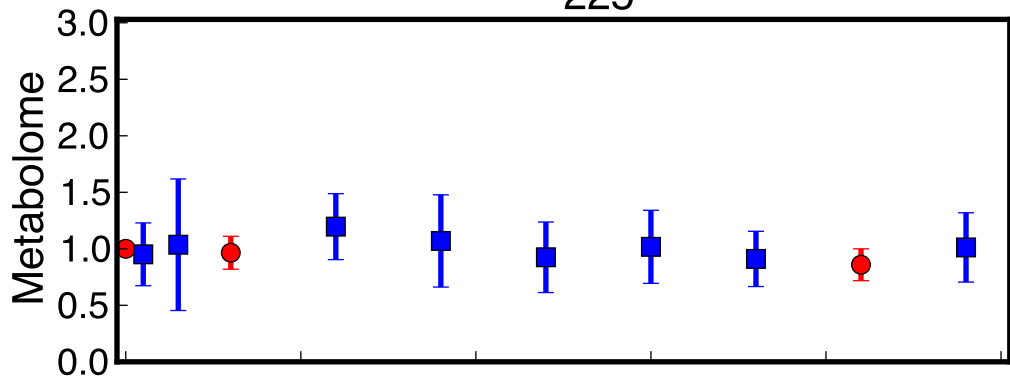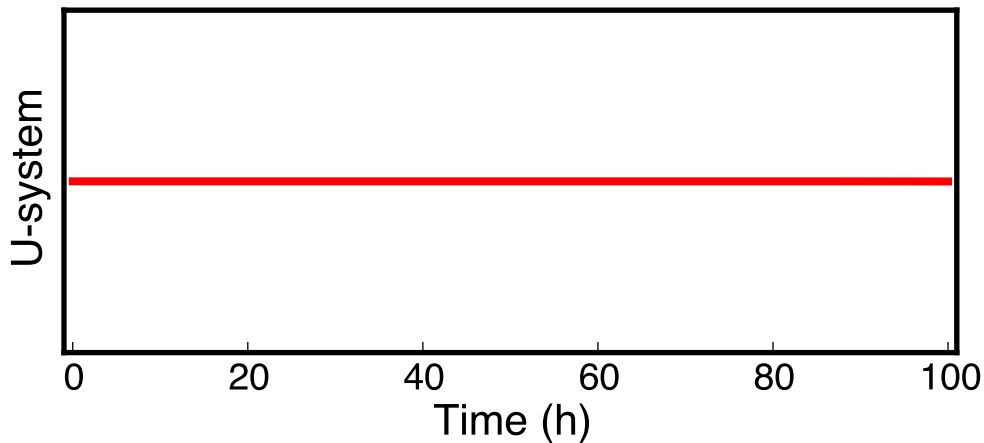

$X_{226}$

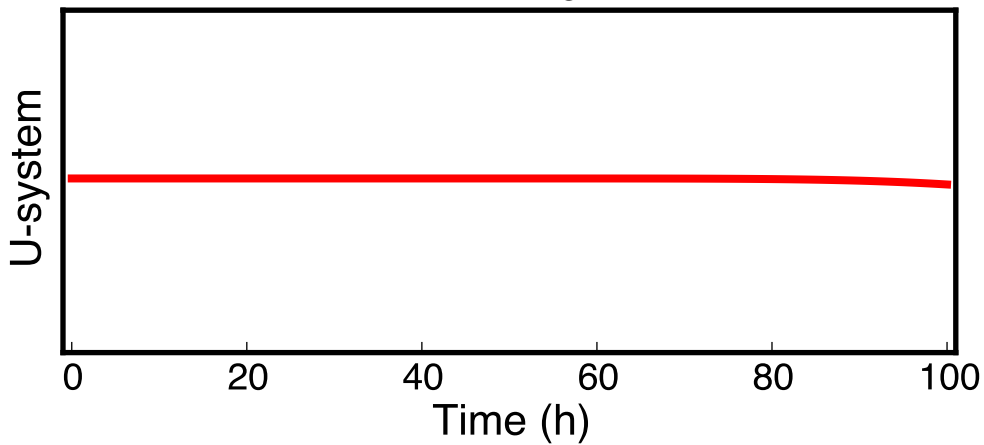

$X_{227}$

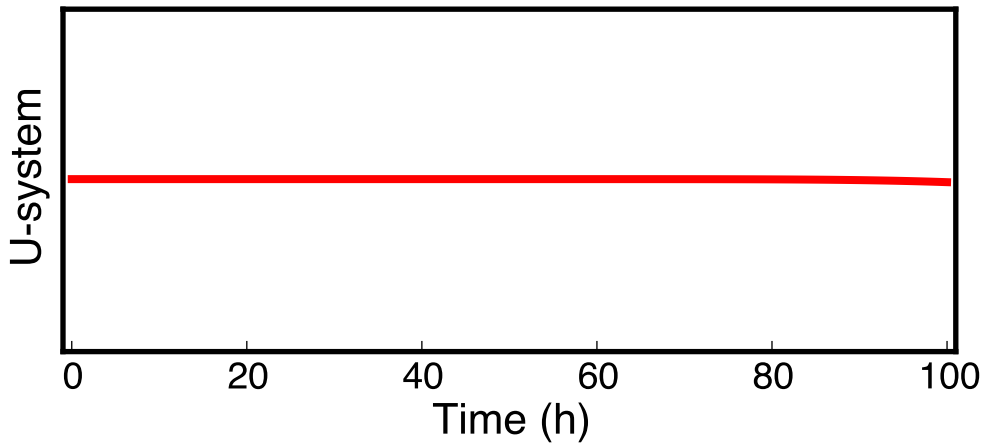

$X_{228}$

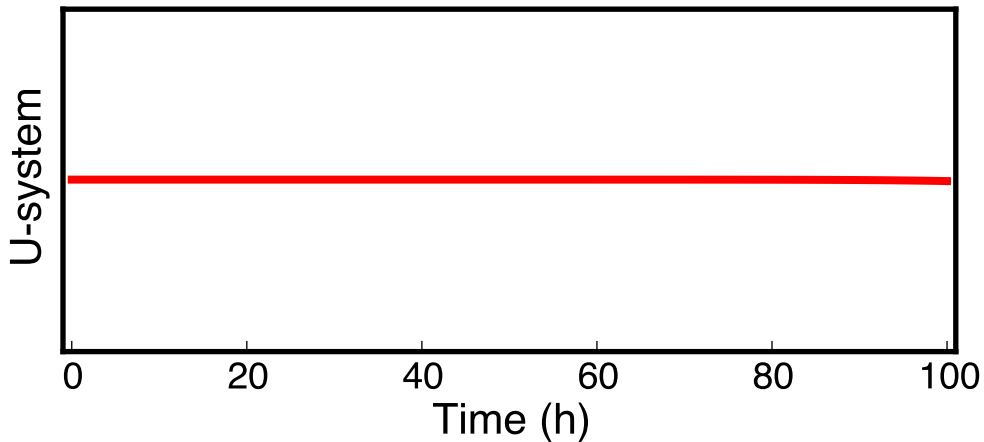

$X_{229}$

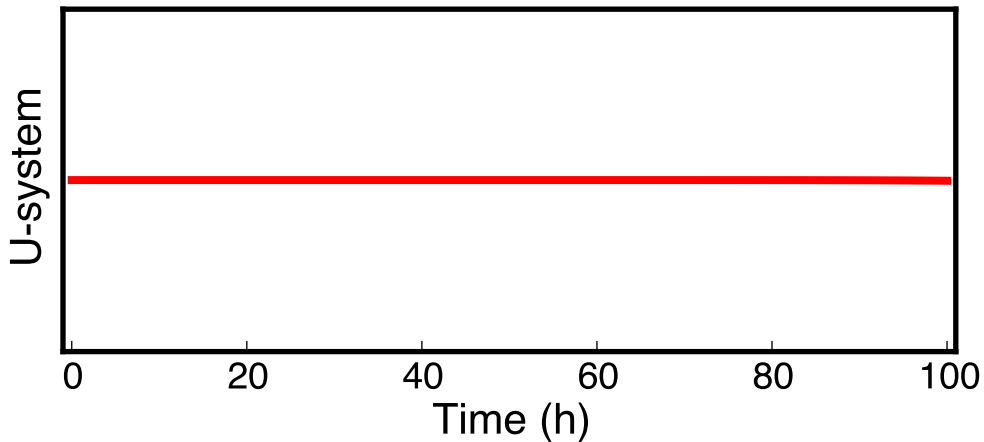

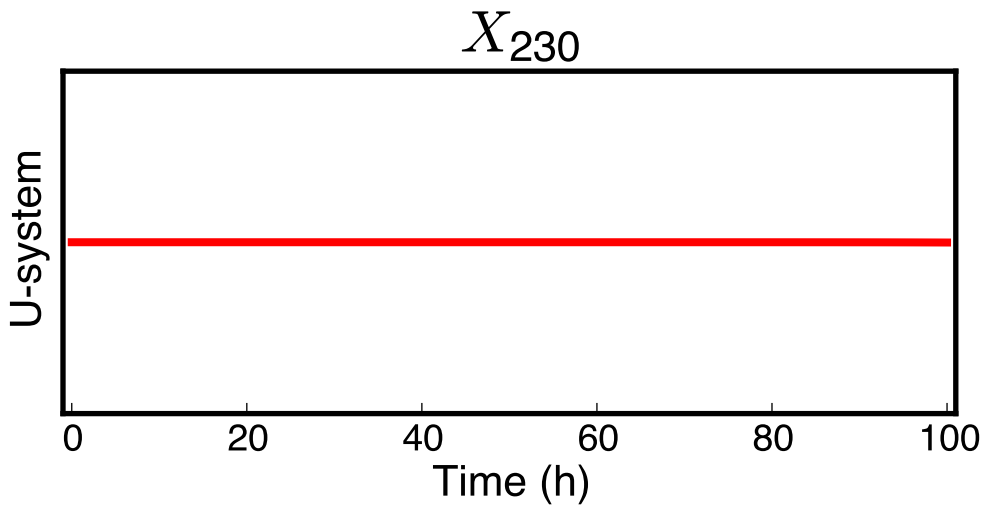

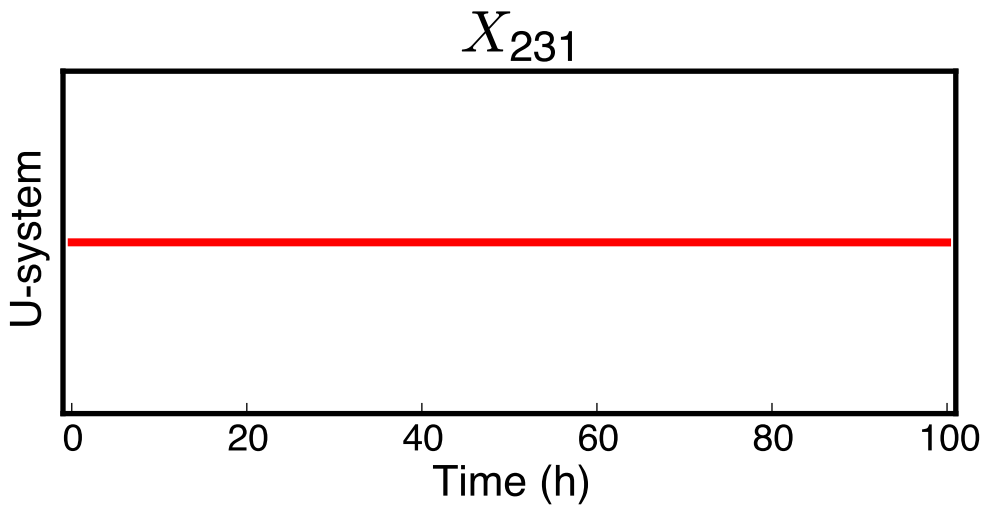

$X_{232}$

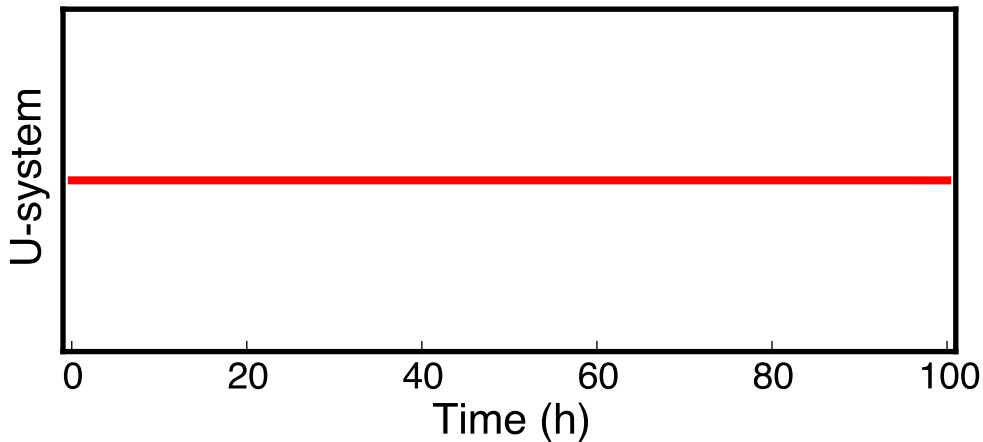



$X_{233}$

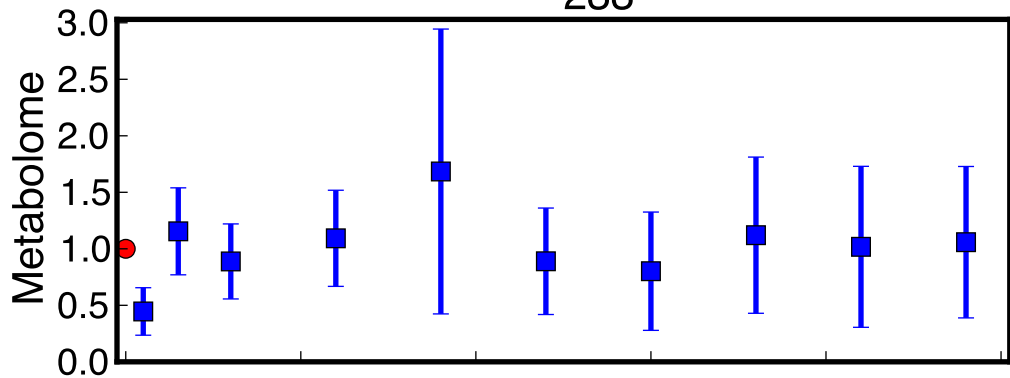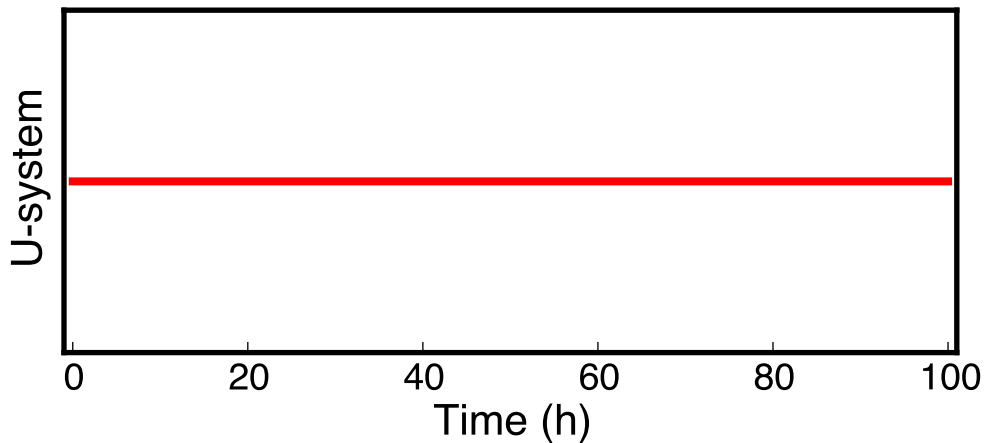

$X_{234}$

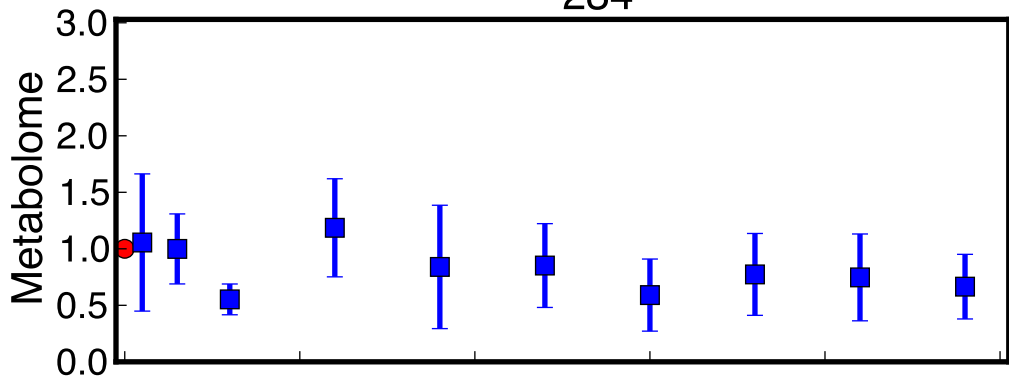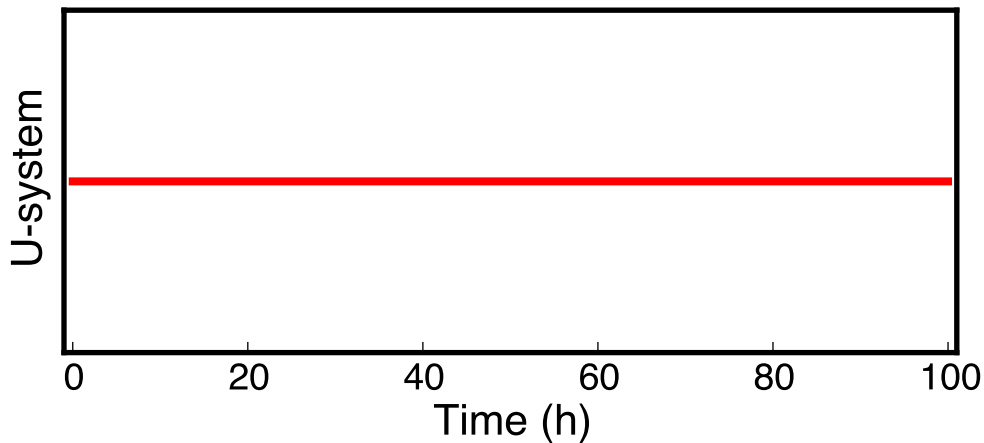

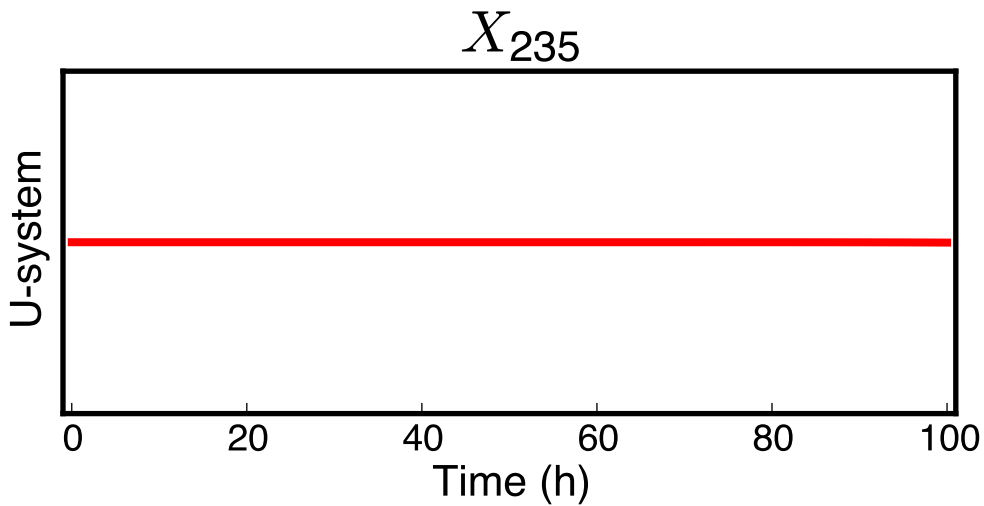

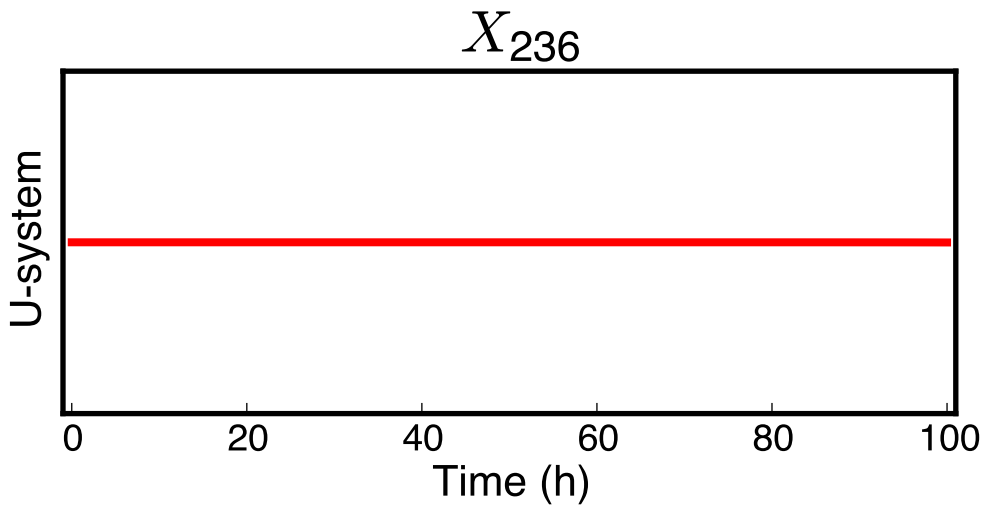

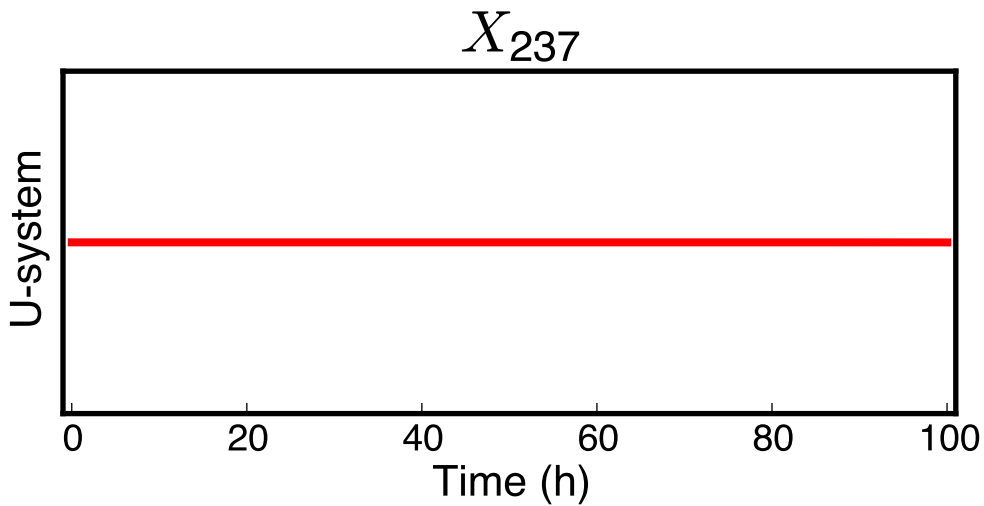

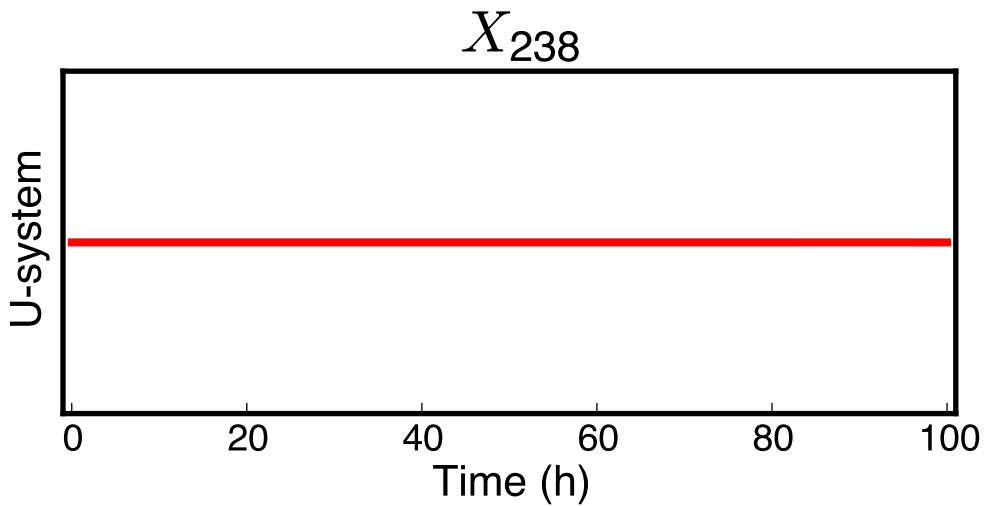

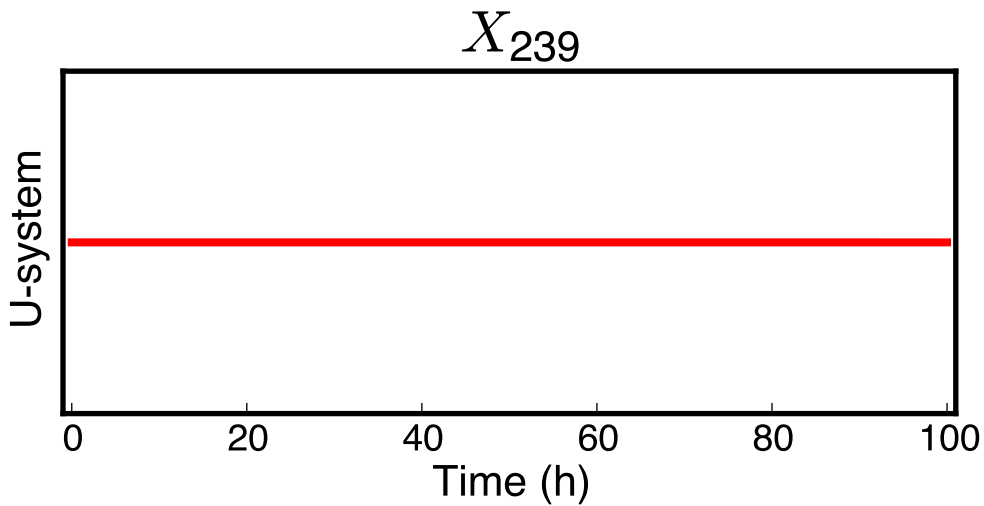

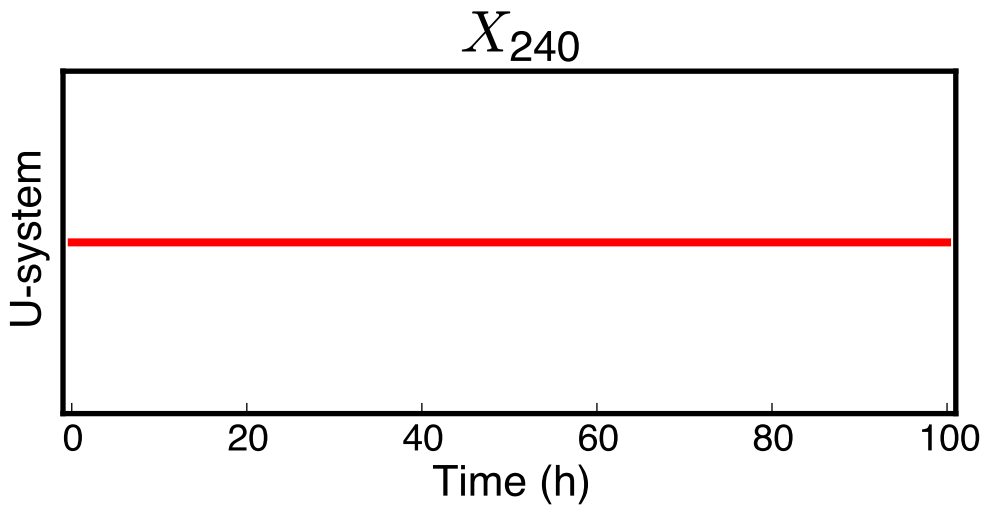



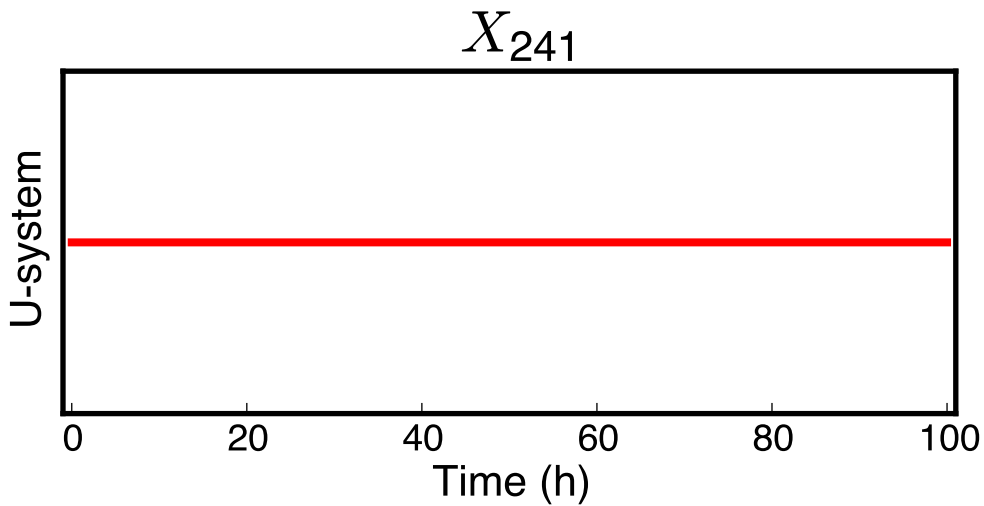

$X_{242}$

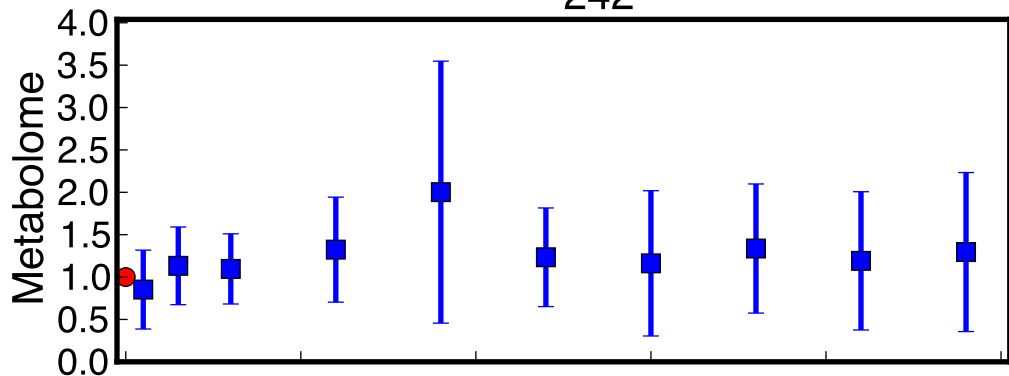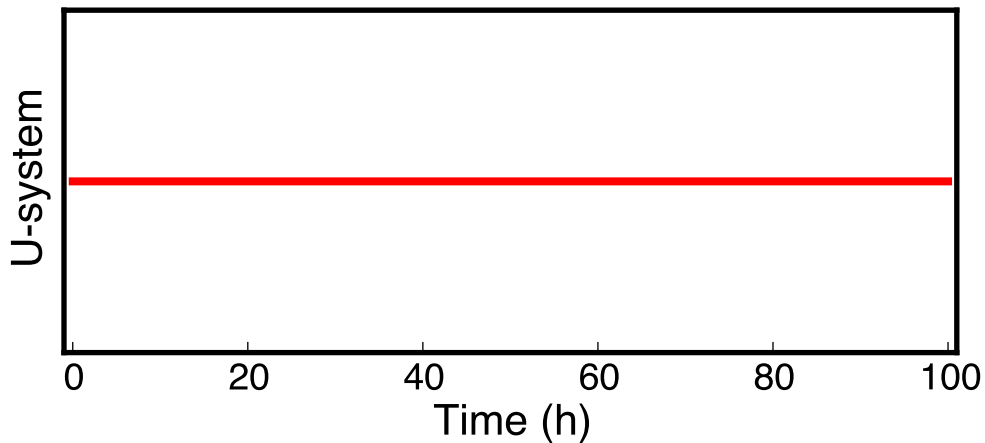

$X_{243}$

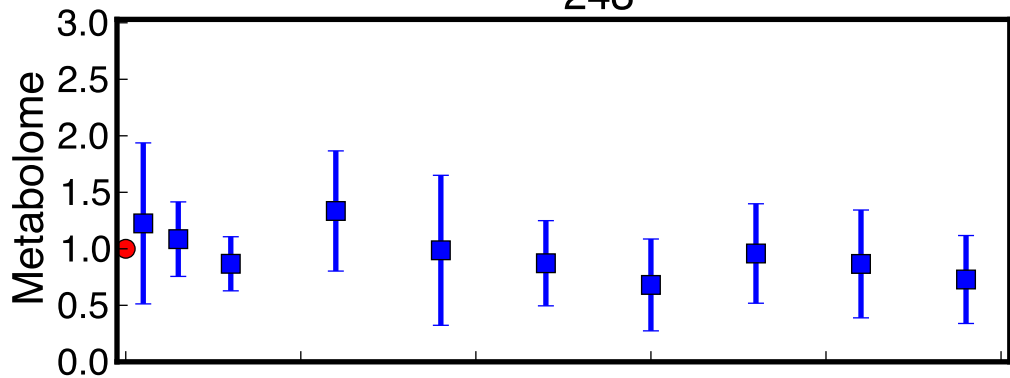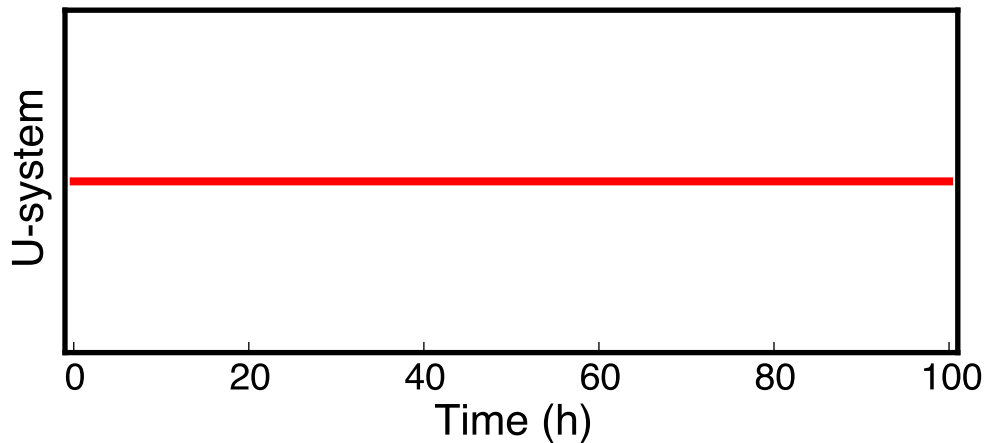

$X_{244}$

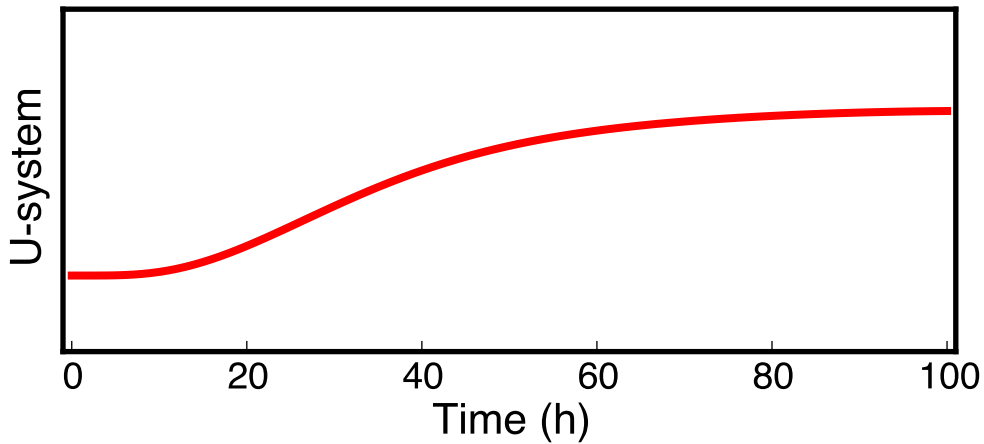

$X_{245}$

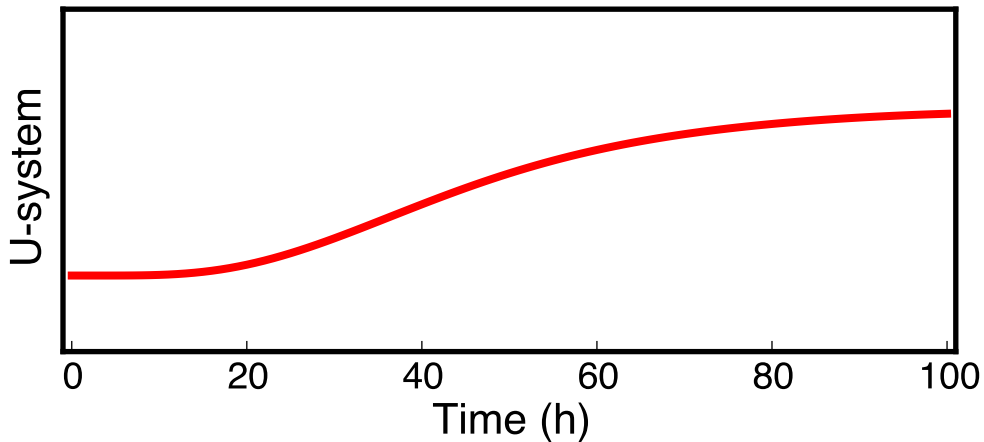

$X_{246}$

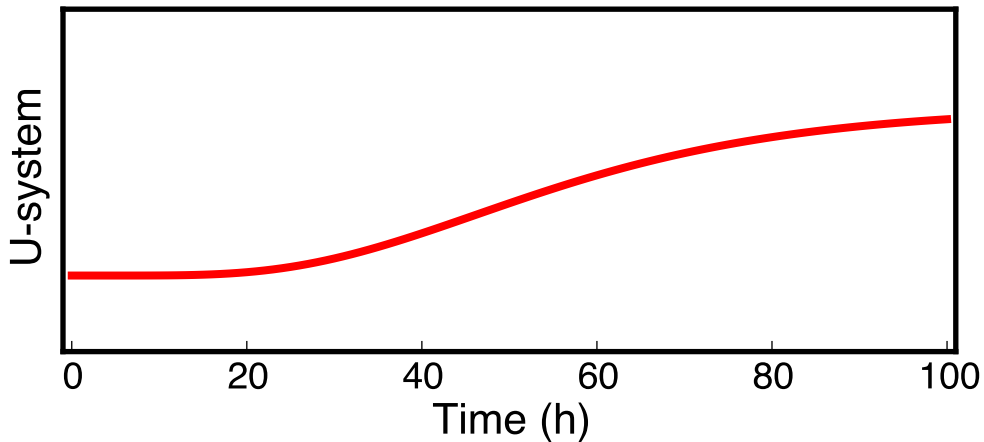

$X_{247}$

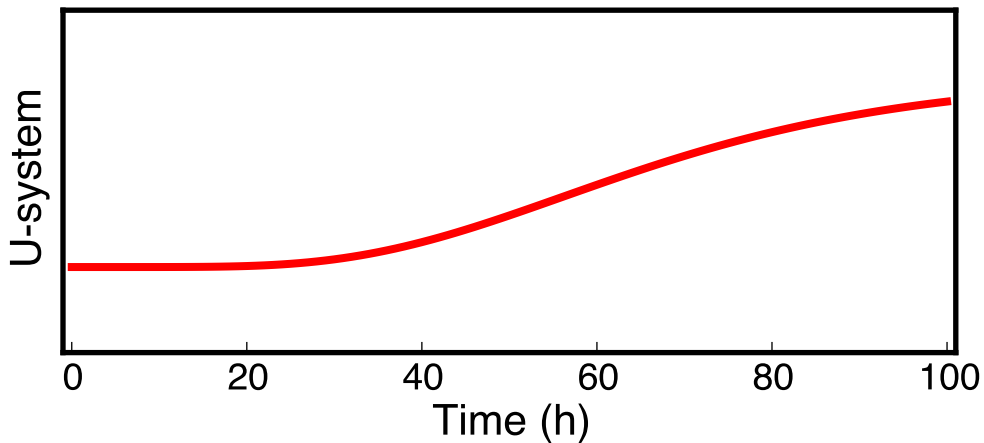

$X_{248}$

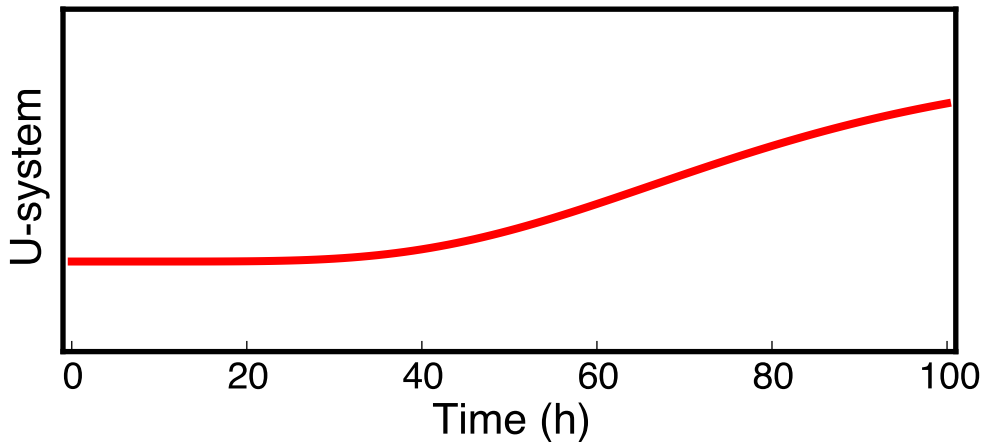



$X_{249}$

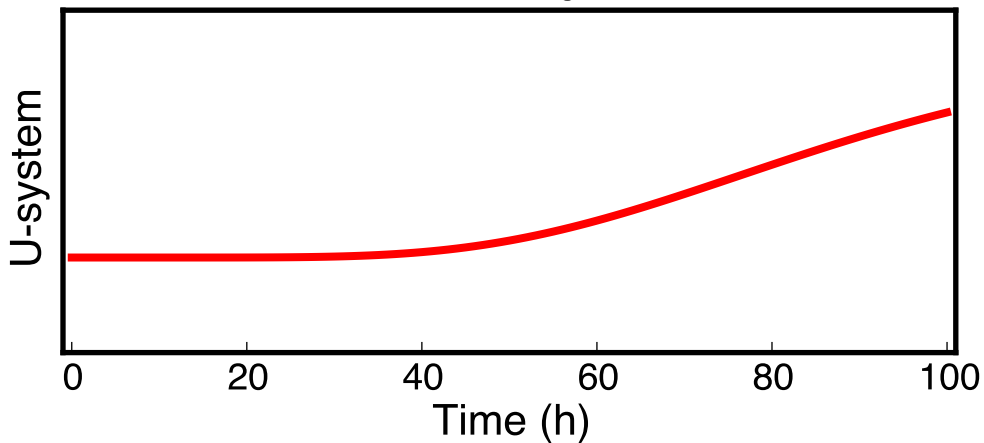

$X_{250}$

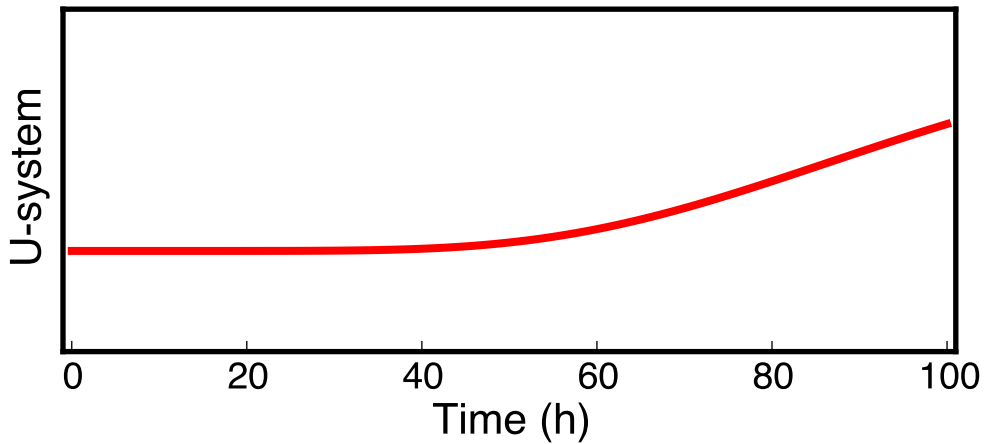

$X_{251}$

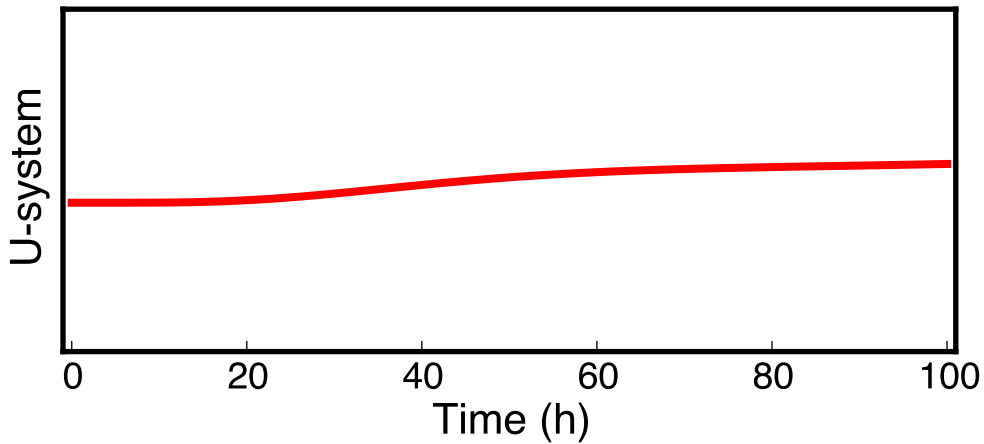

$X_{252}$

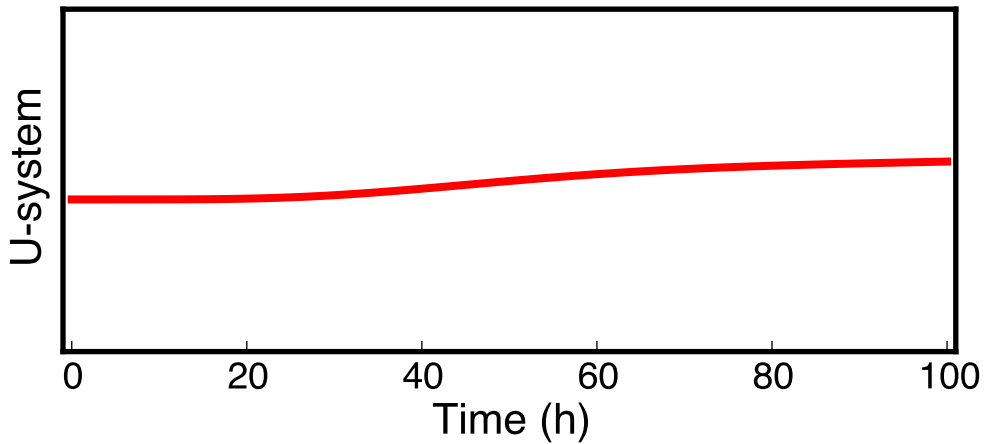

$X_{253}$

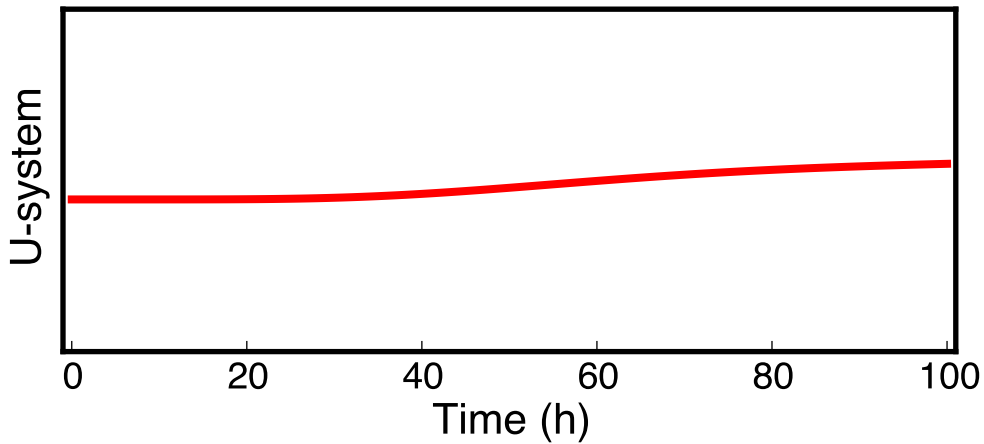

$X_{254}$

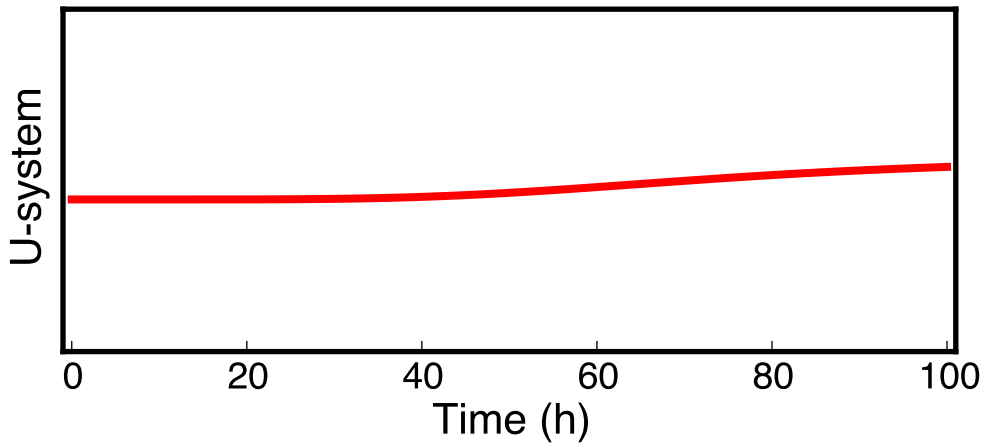

$X_{255}$

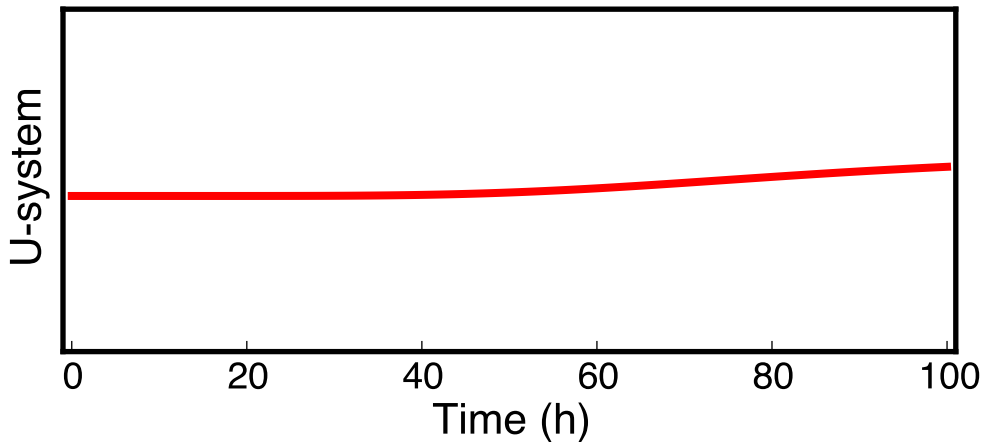

$X_{256}$

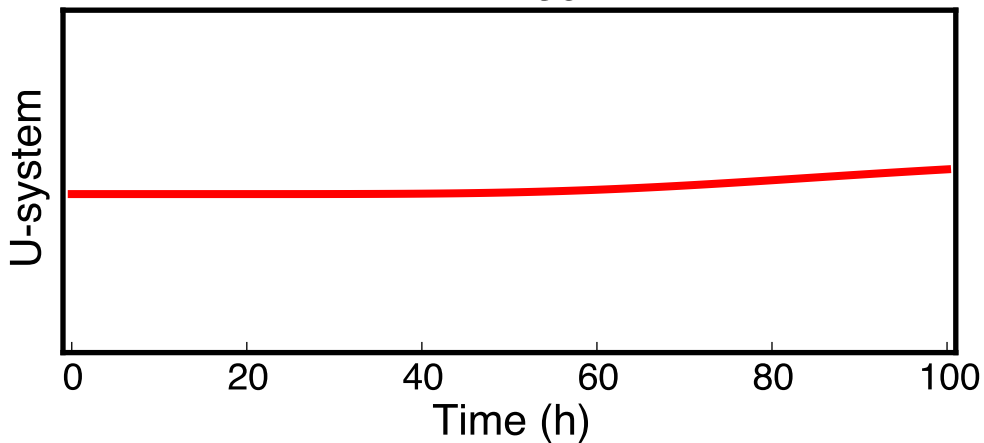



$X_{257}$

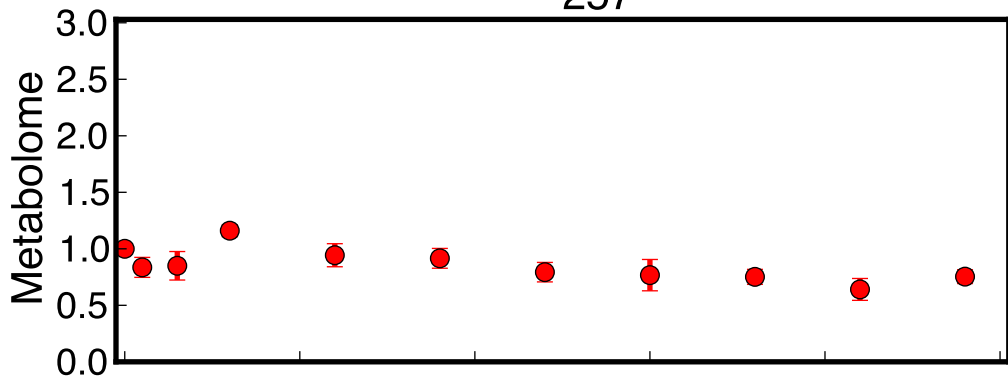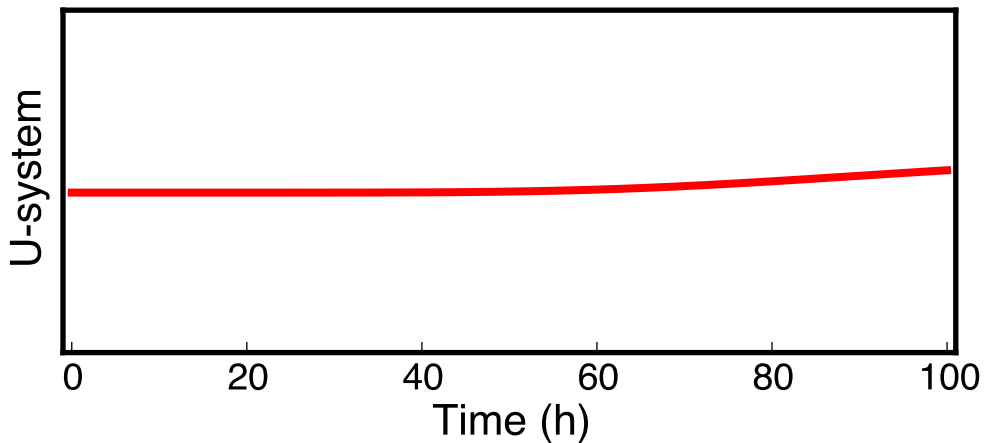

$X_{258}$

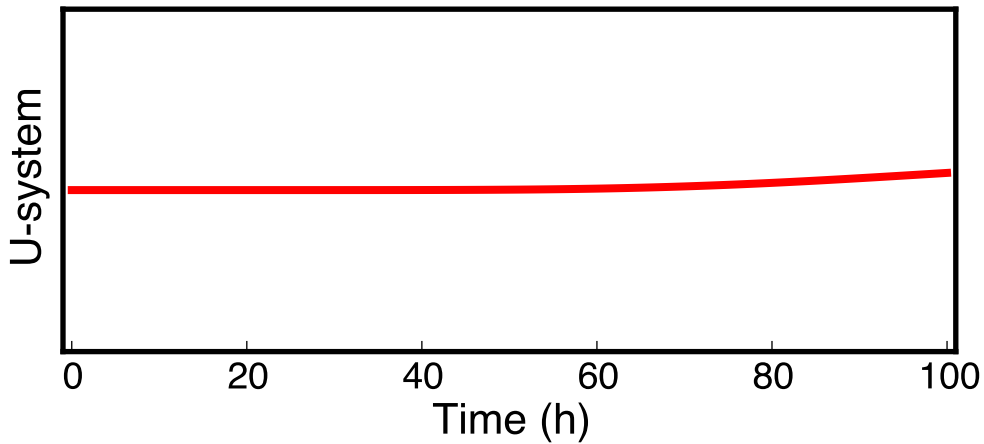

$X_{259}$

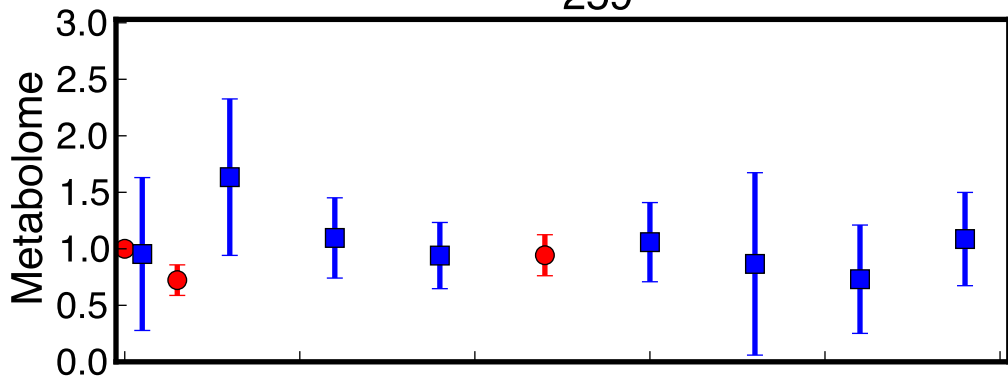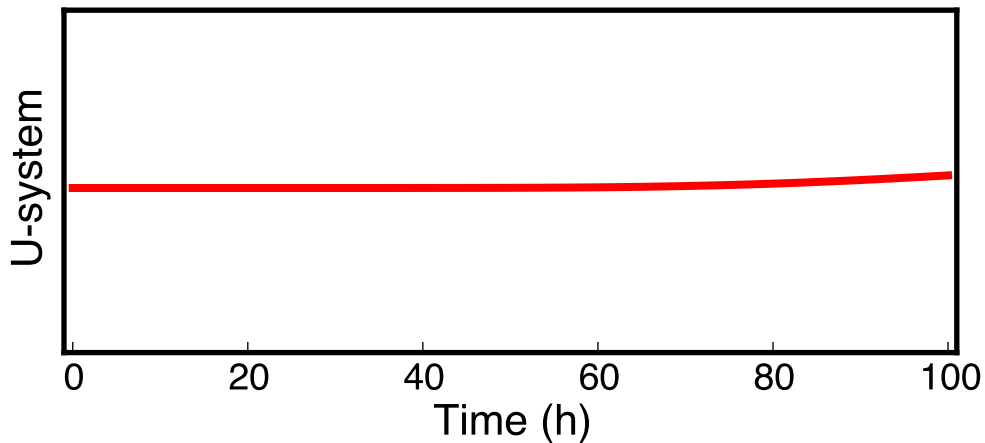

$X_{260}$

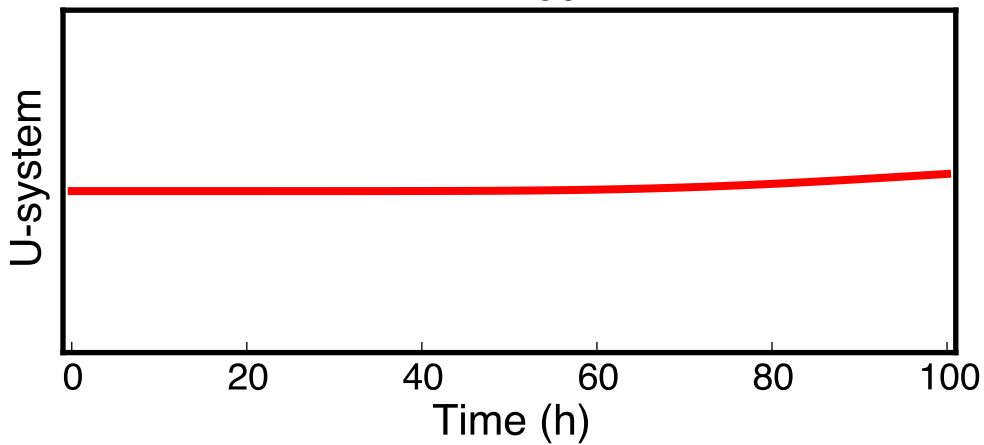

$X_{261}$

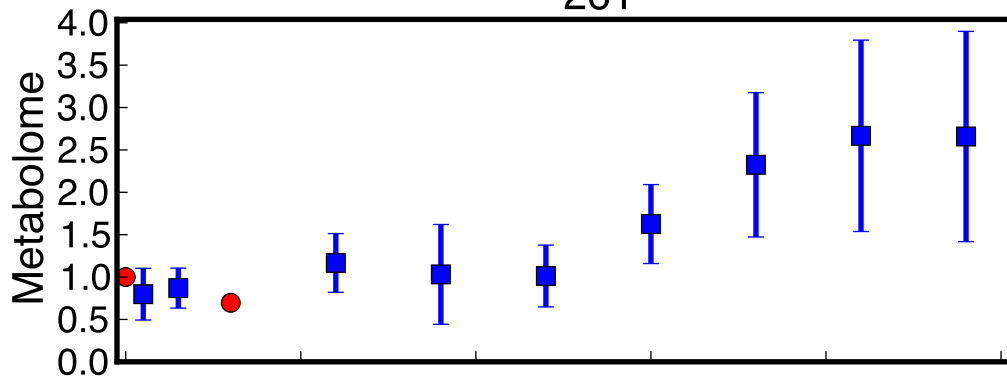

$X_{262}$

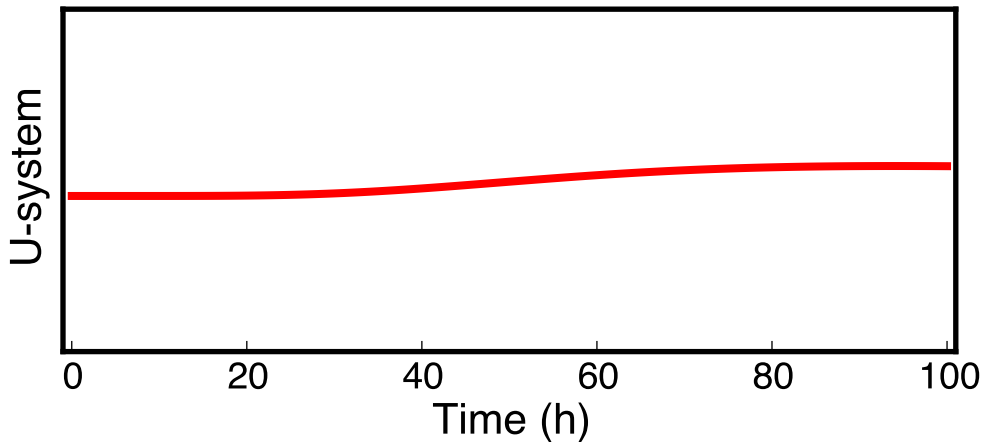

$X_{263}$

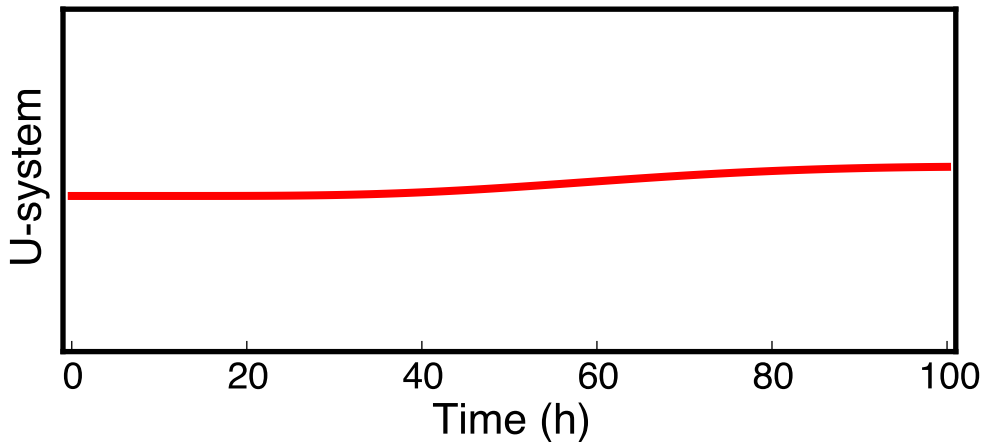

$X_{264}$

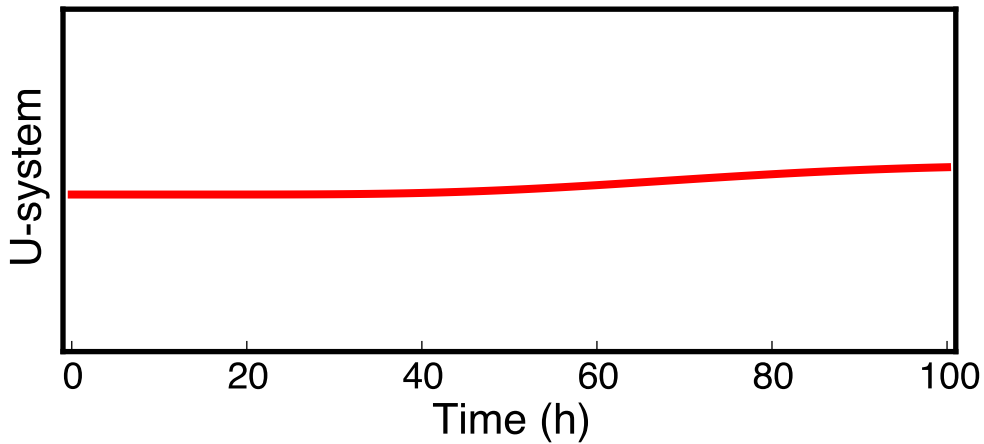



$X_{265}$

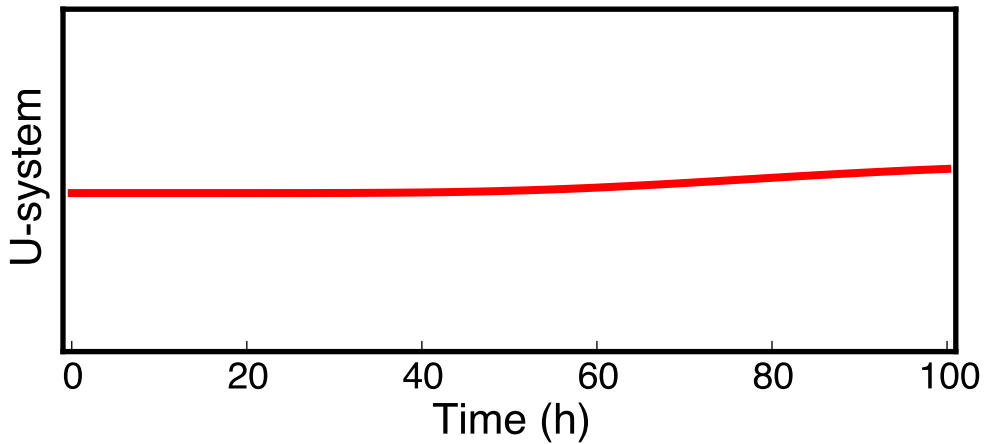

$X_{266}$

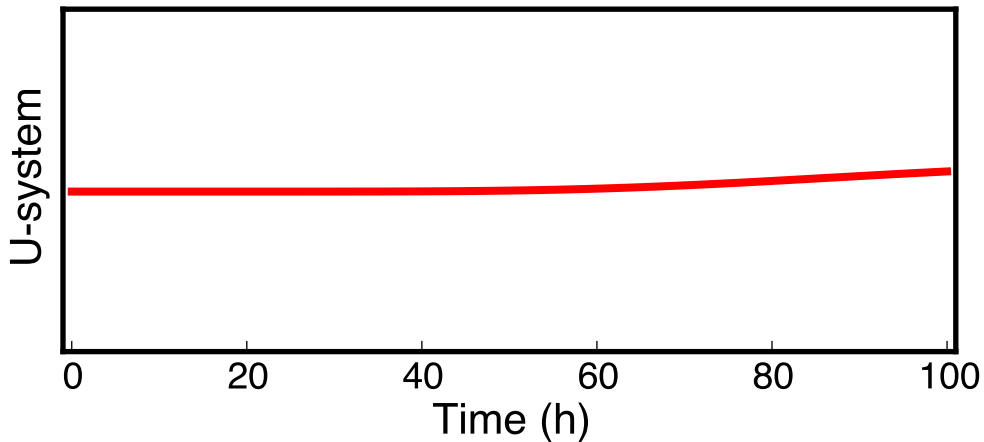

$X_{267}$

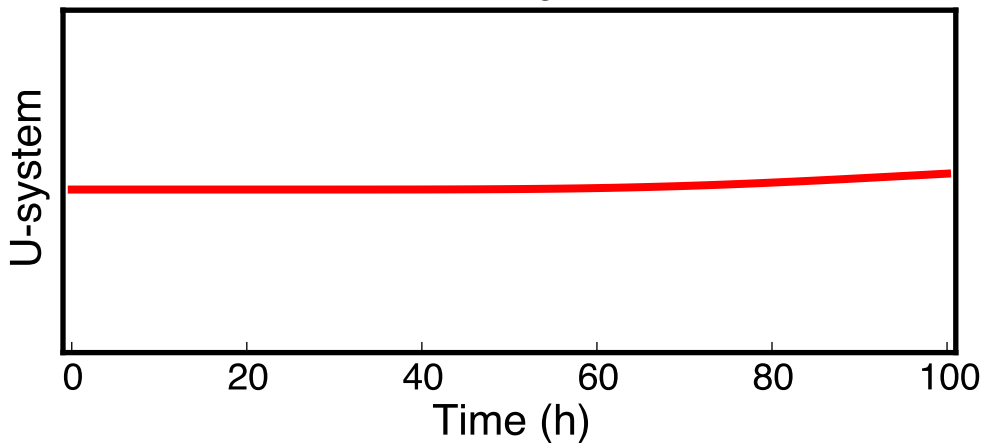

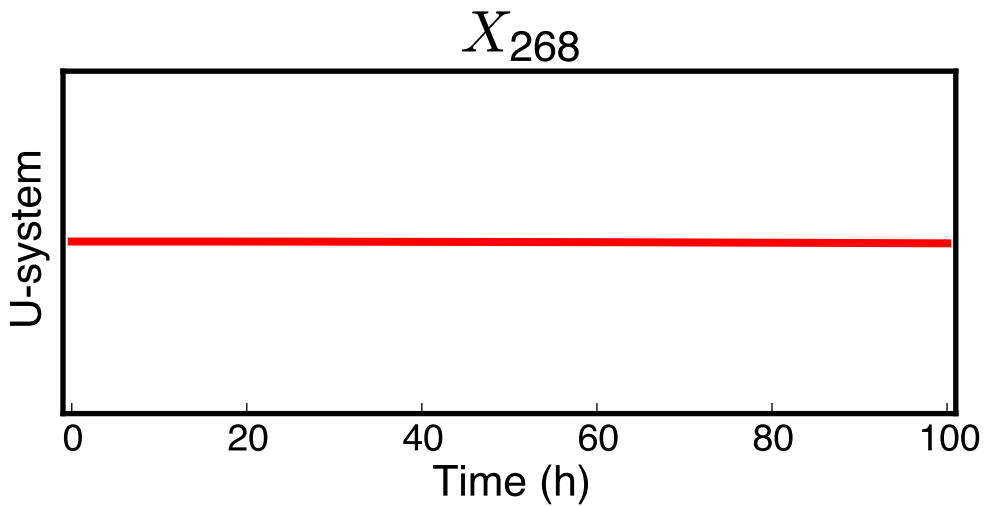

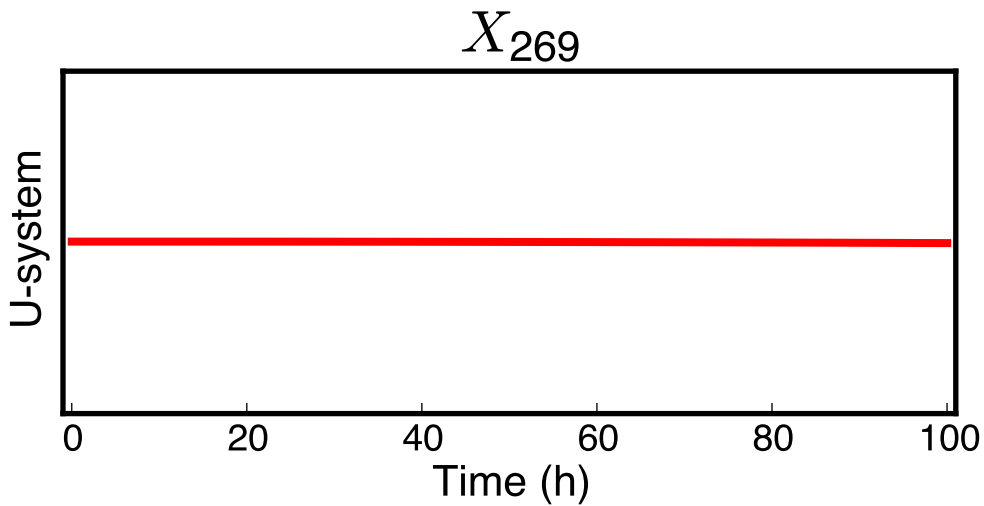

$X_{270}$

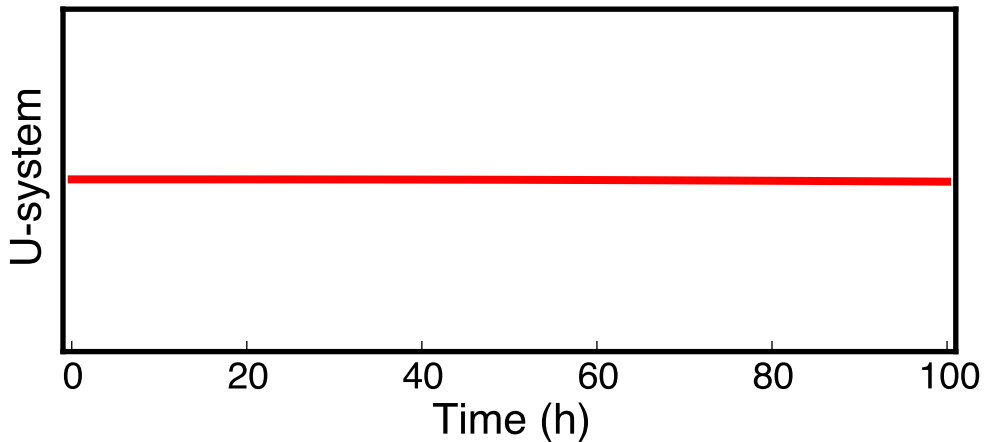

$X_{271}$

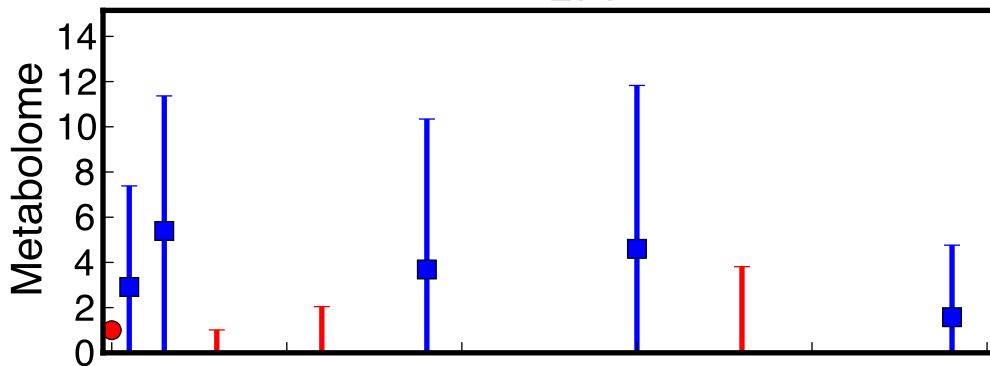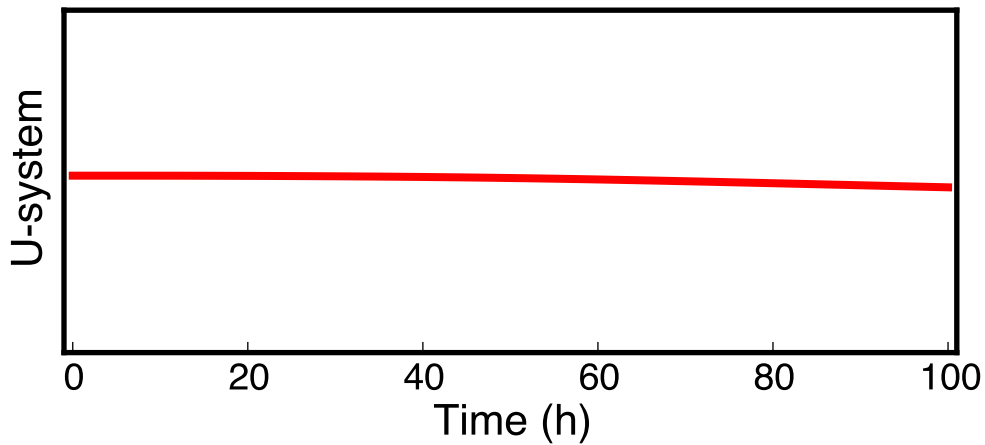

$X_{272}$

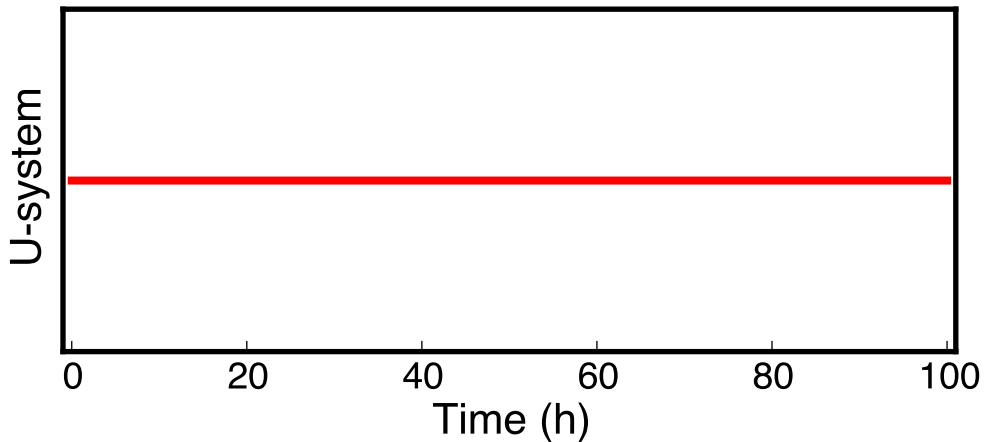



$X_{273}$

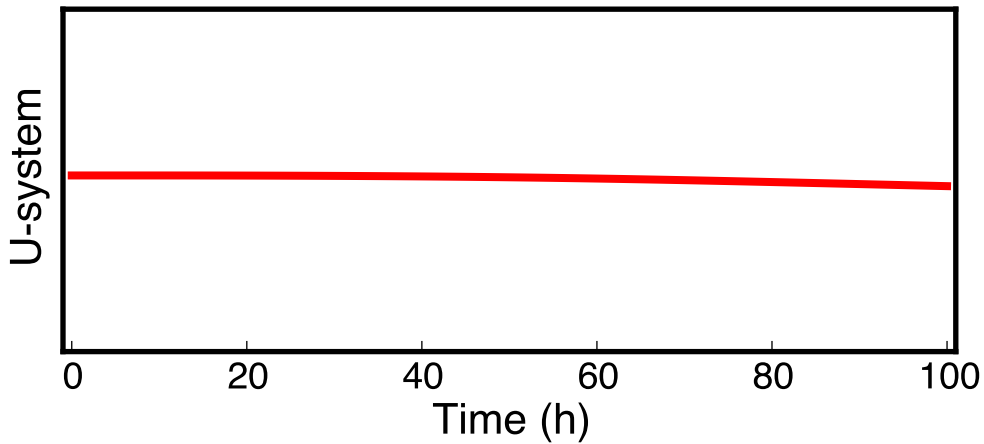

$X_{274}$

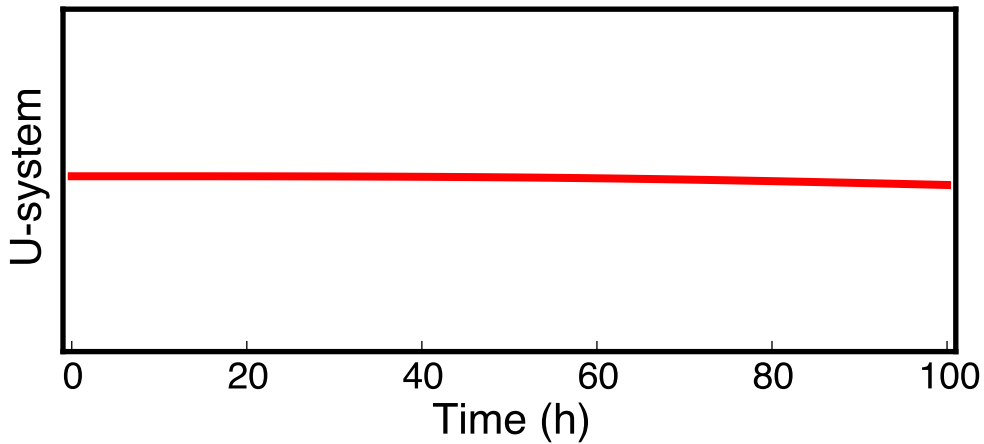

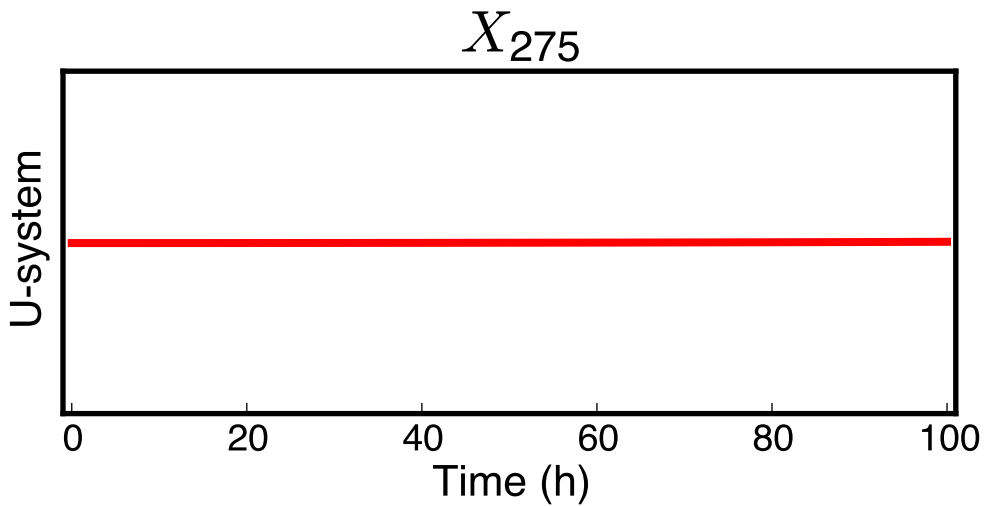

$X_{276}$

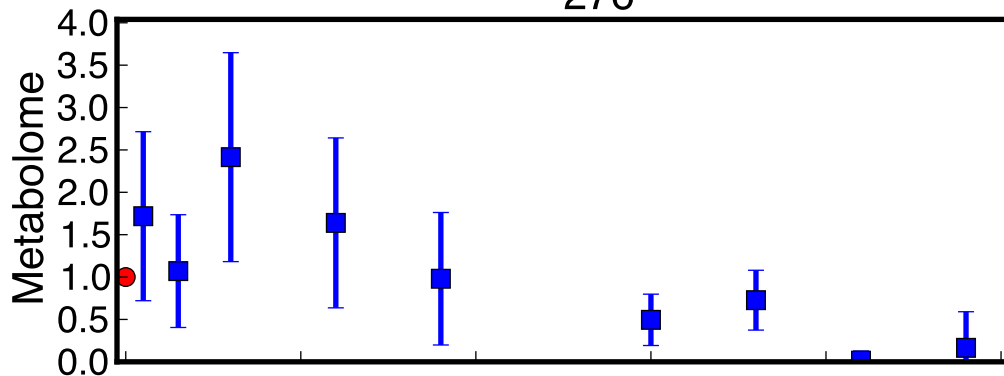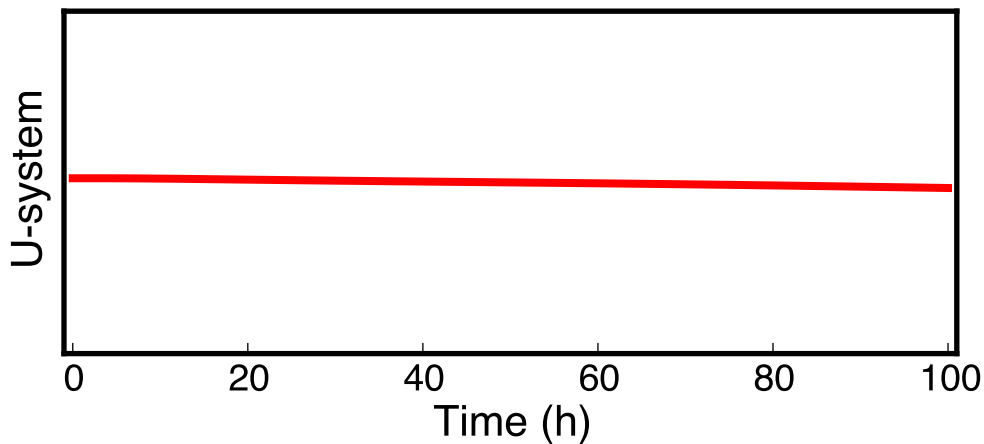

$X_{277}$

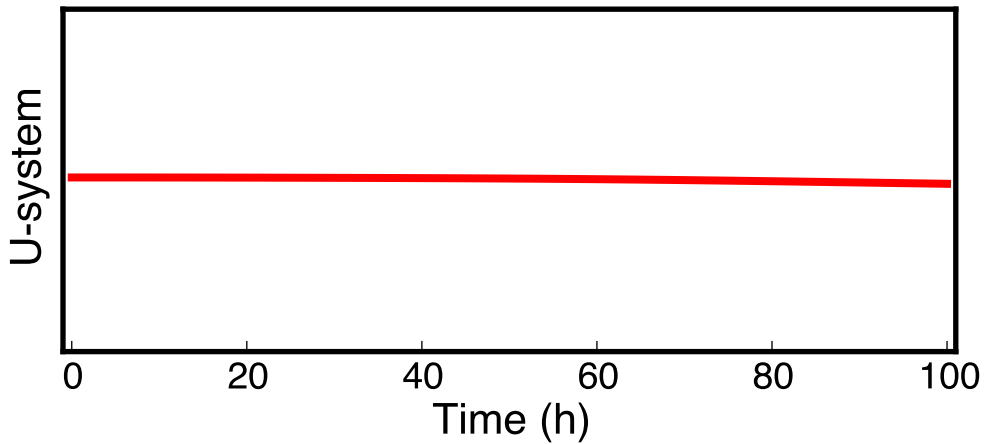

$X_{278}$

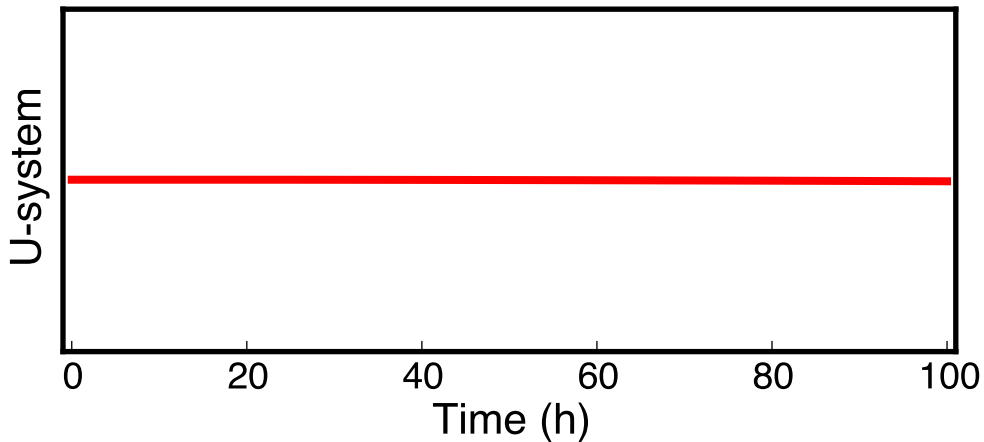

$X_{279}$

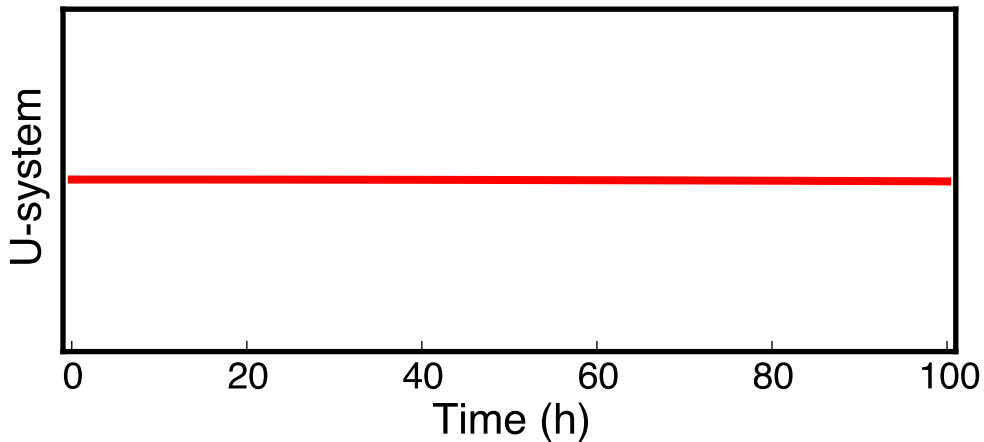

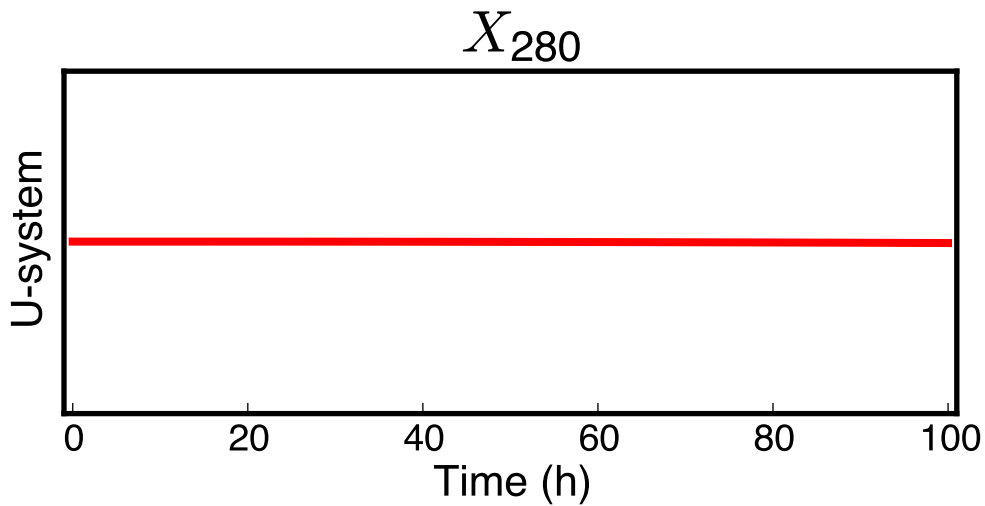



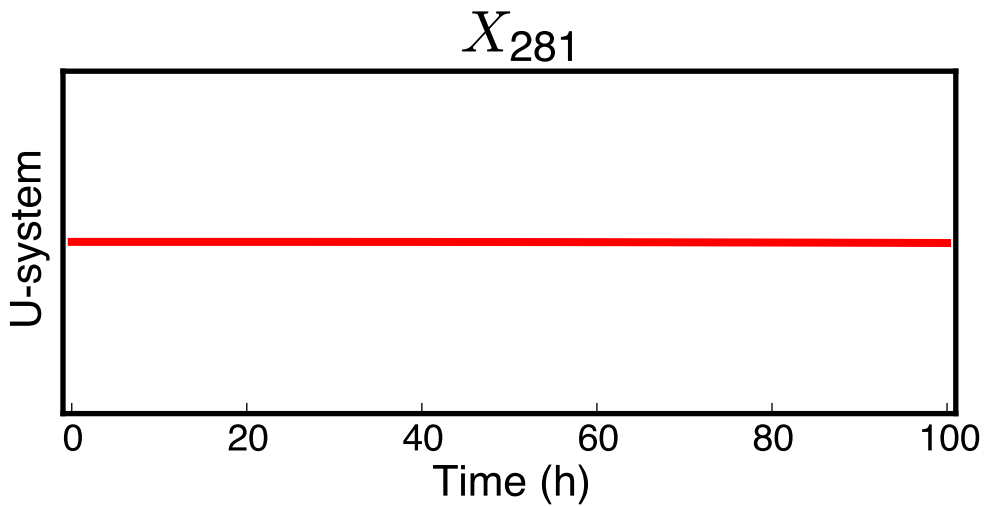

$X_{282}$

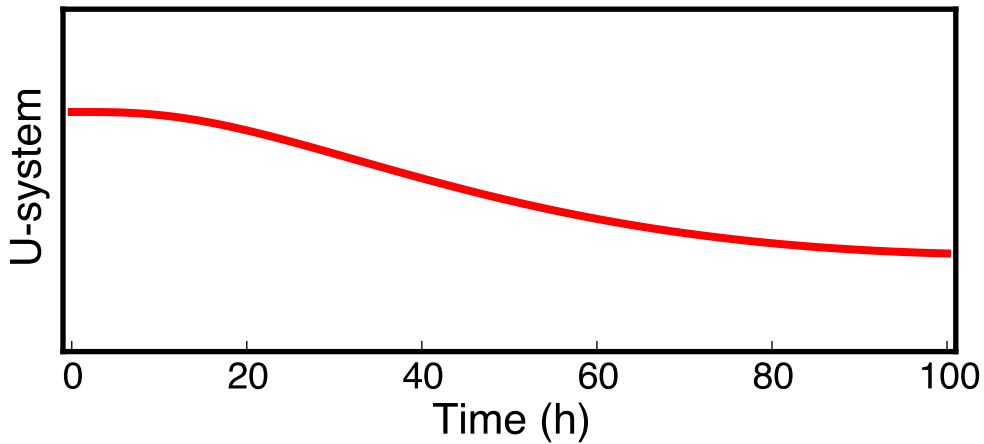

$X_{283}$

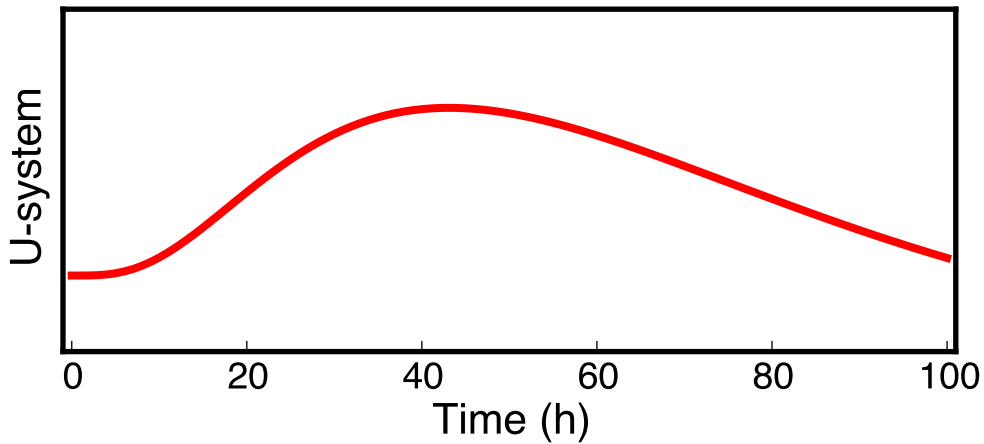

$X_{284}$

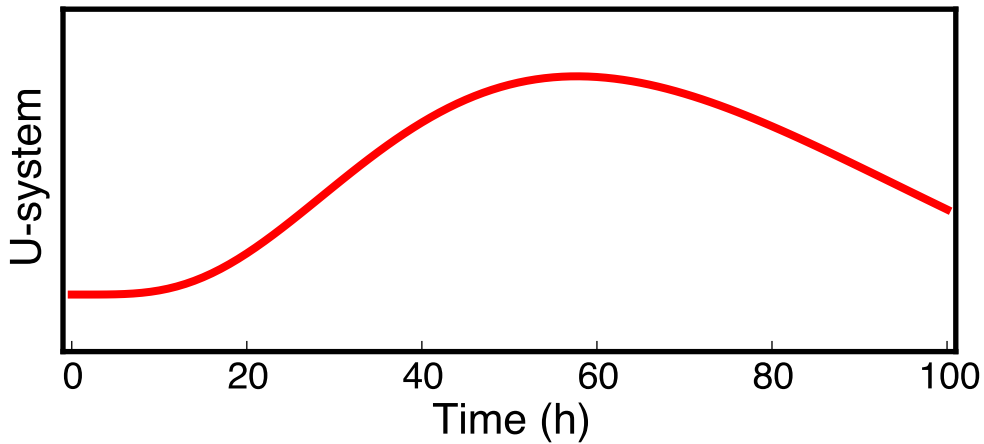

$X_{285}$

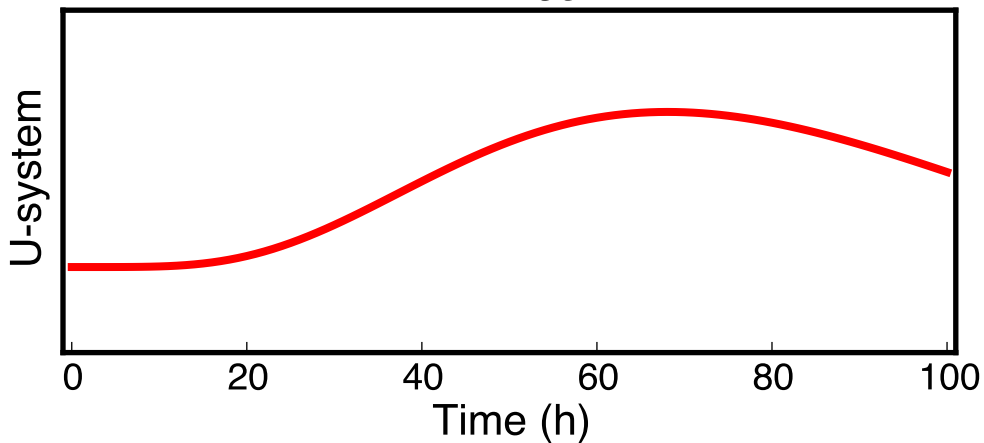

$X_{286}$

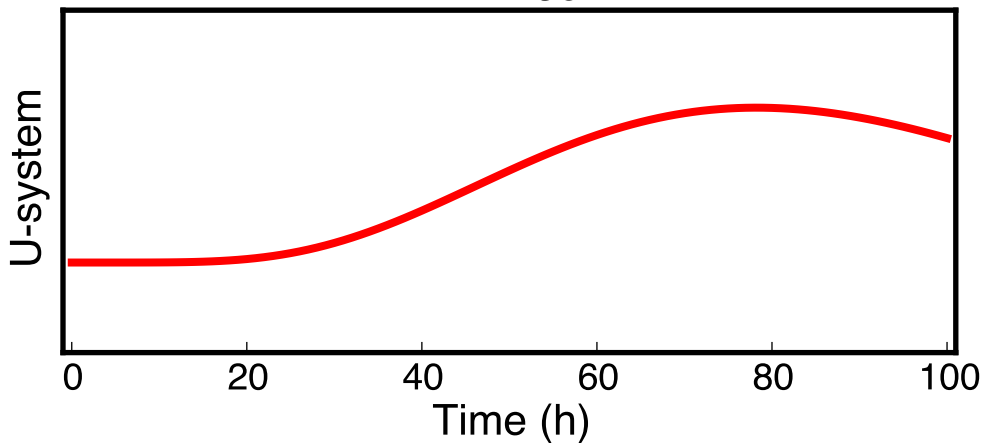

$X_{287}$

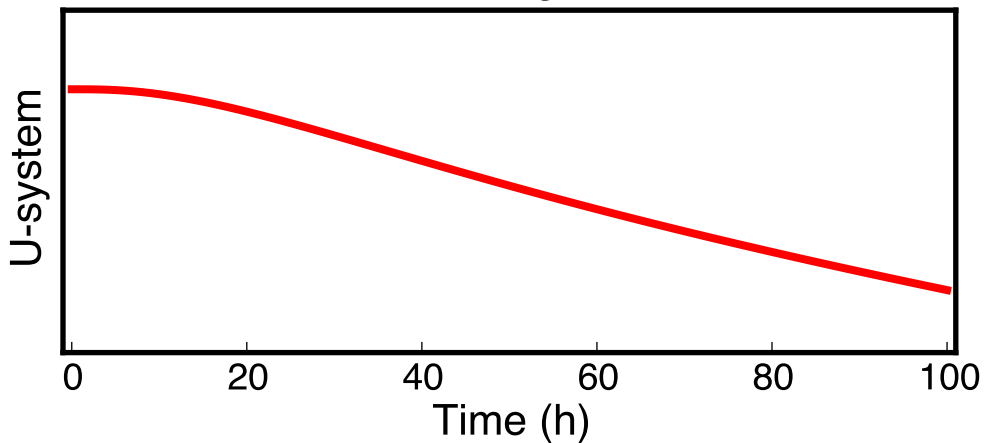

$X_{288}$

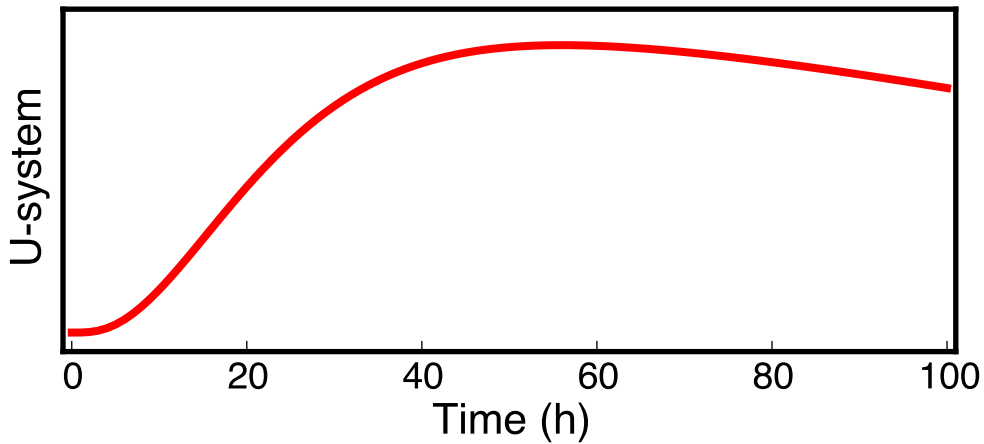



$X_{289}$

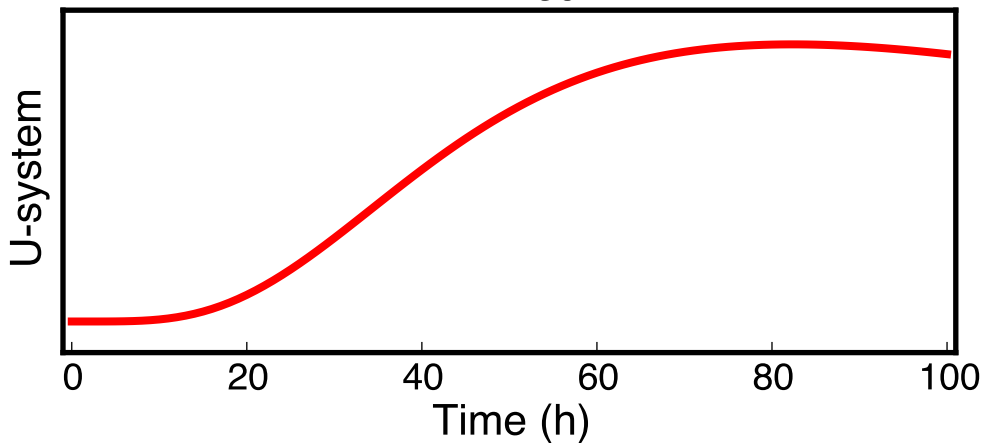

$X_{290}$

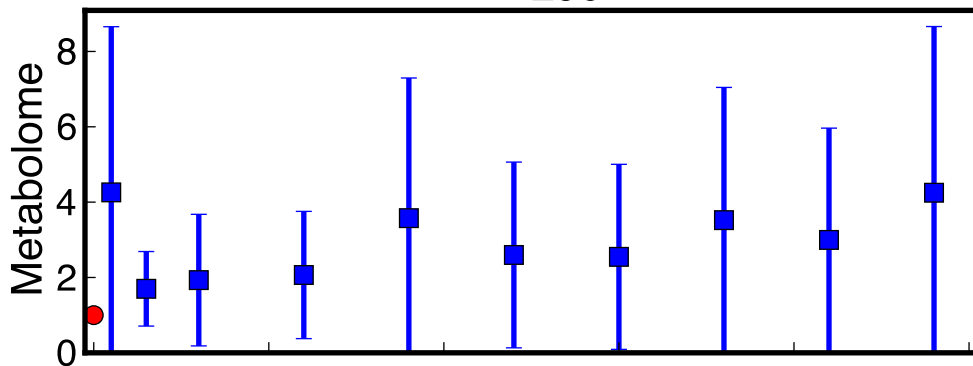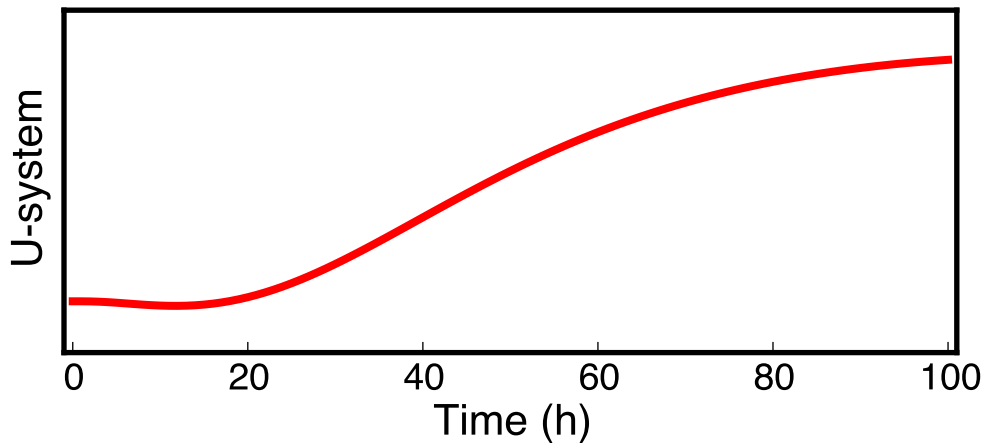

$X_{291}$

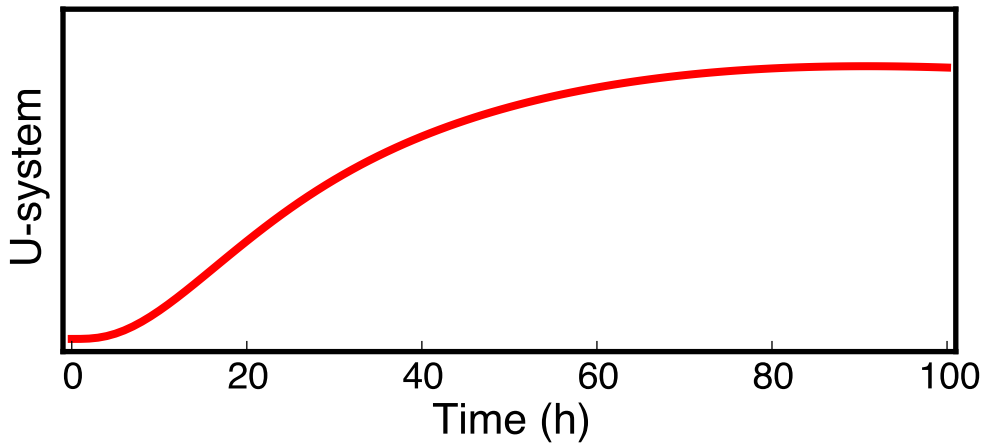

$X_{292}$

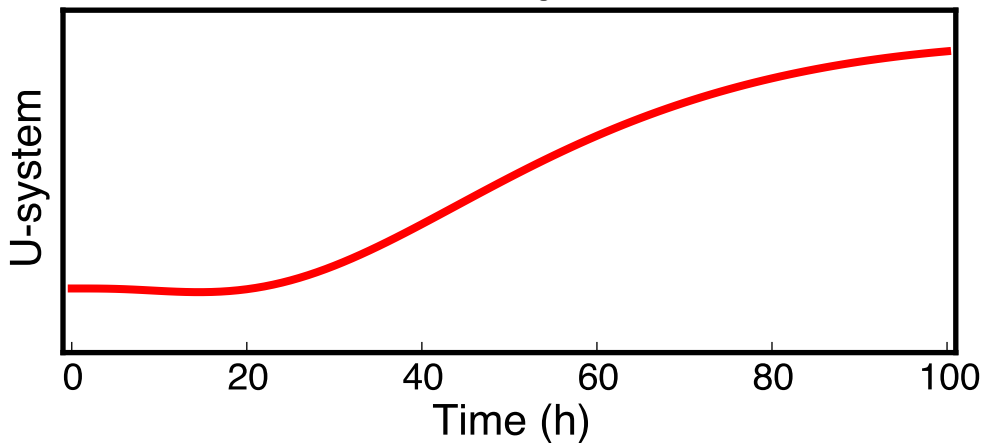

$X_{293}$

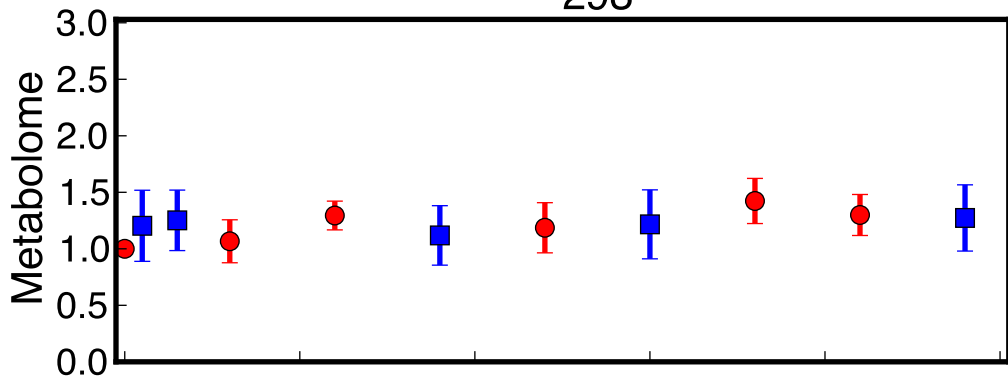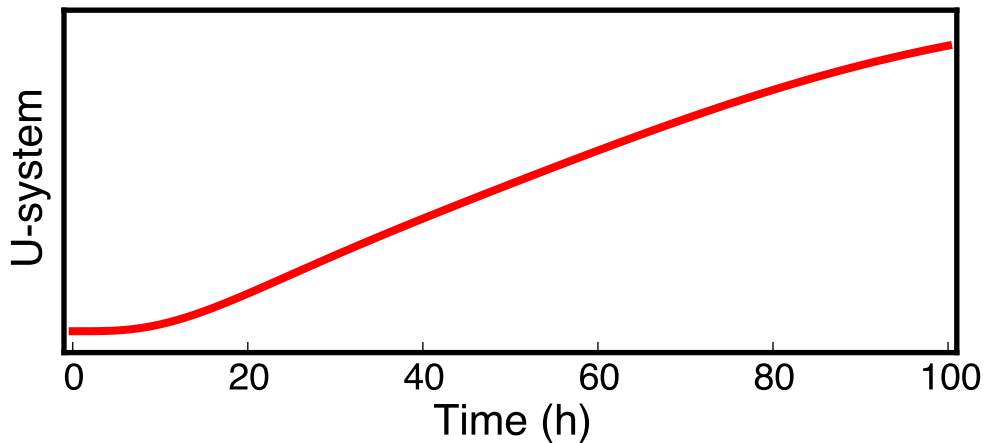

$X_{294}$

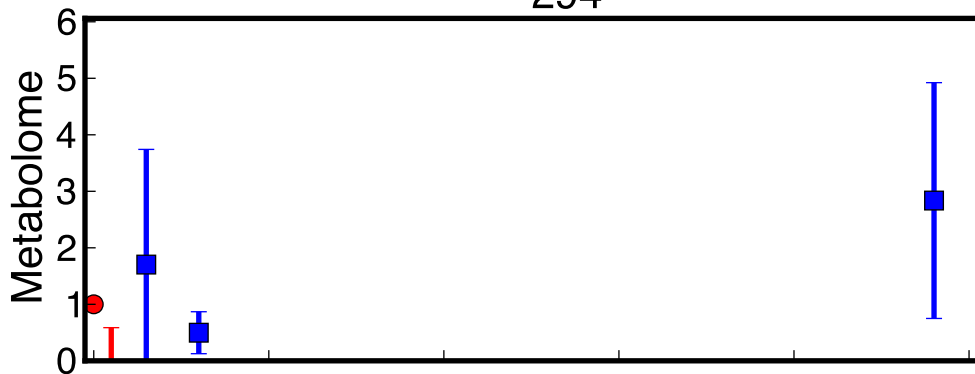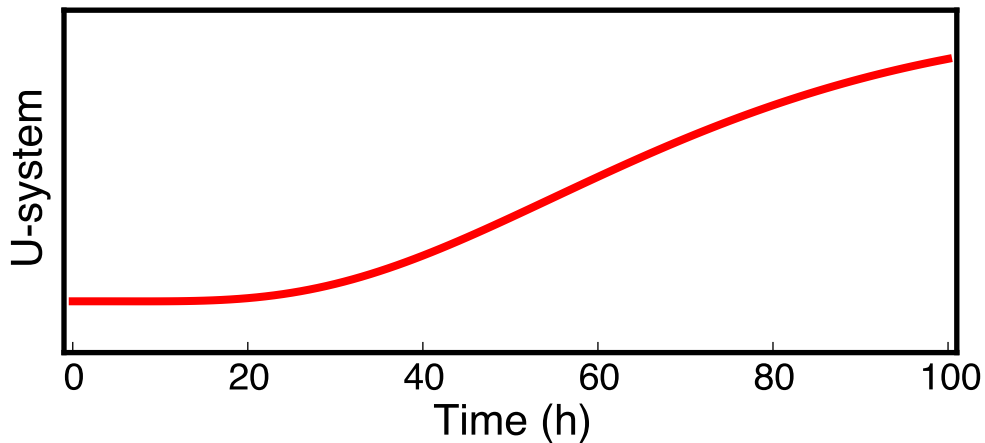

$X_{295}$

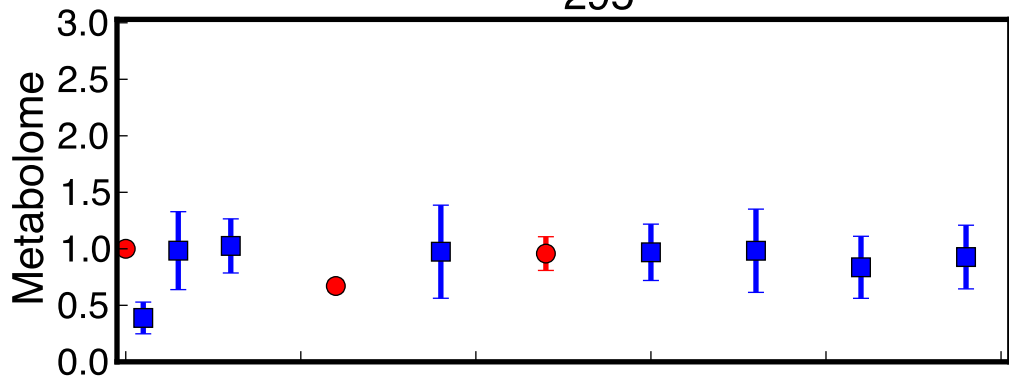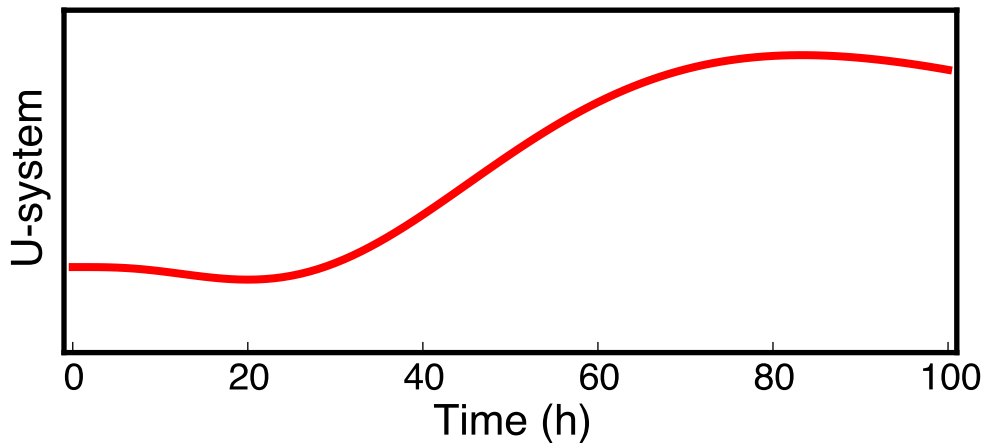

$X_{296}$

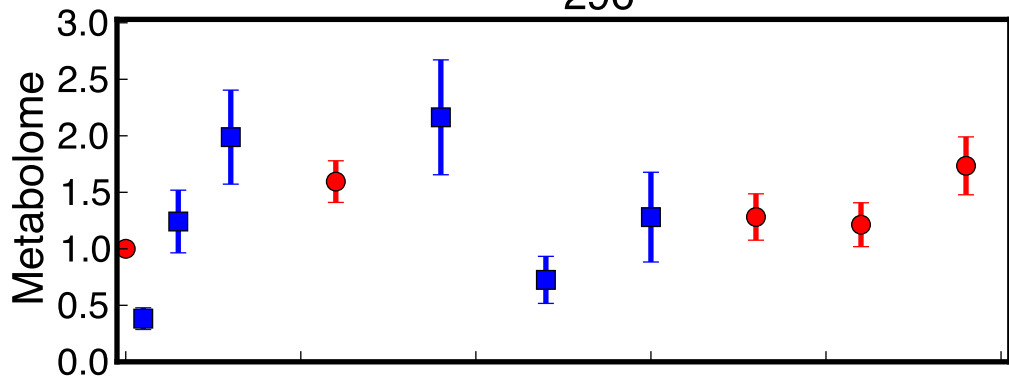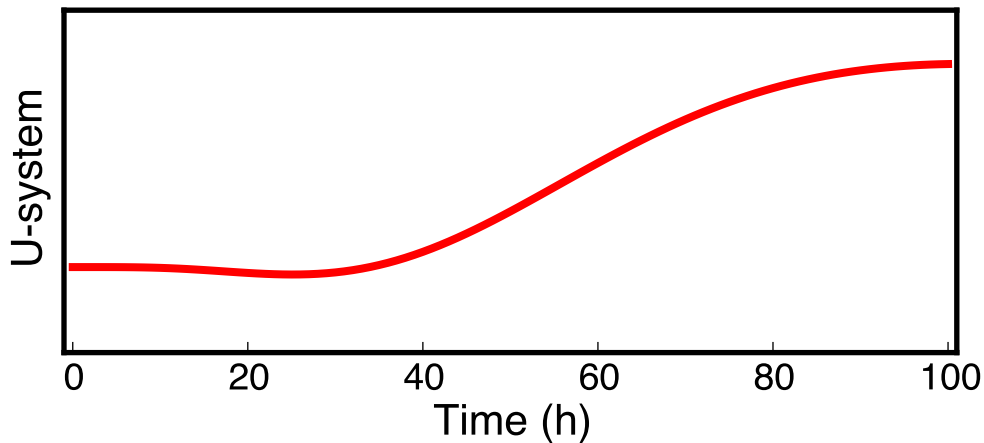



$X_{297}$

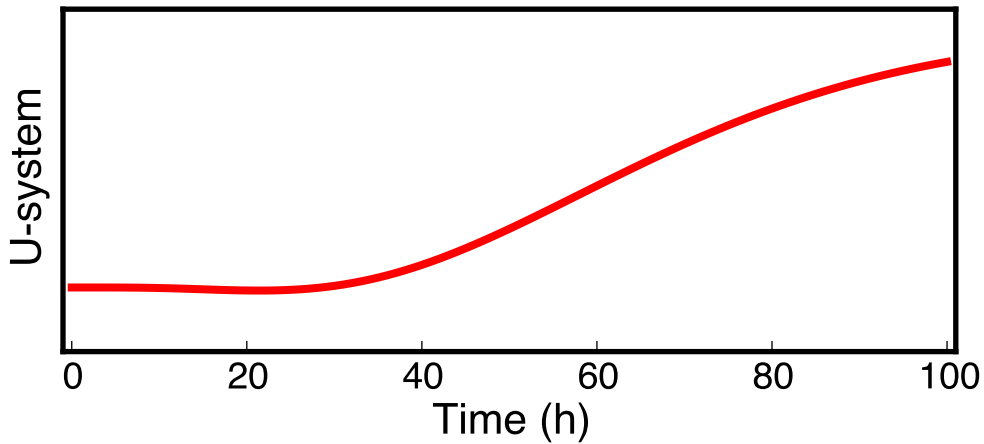

$X_{298}$

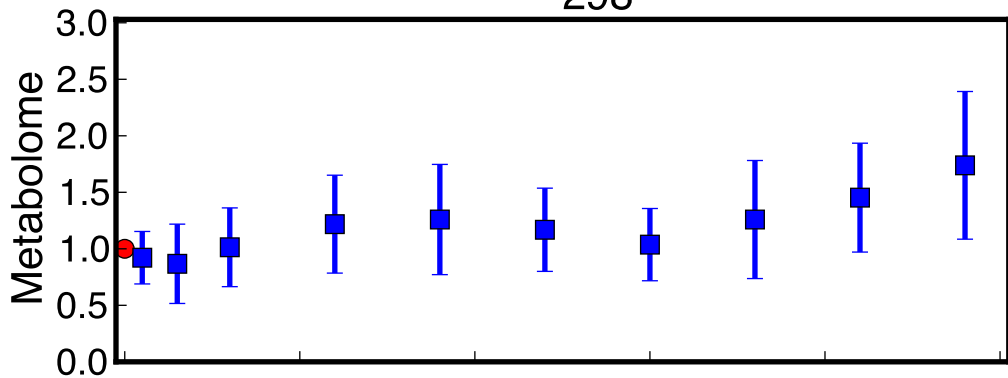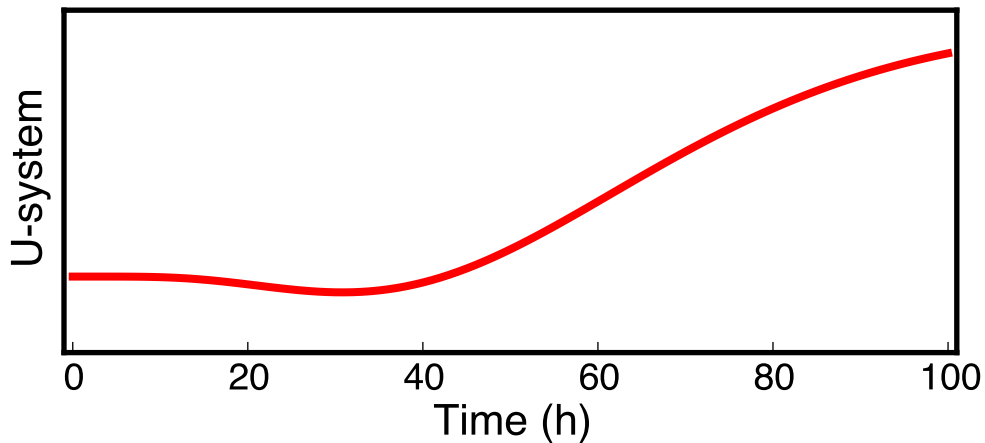

$X_{299}$

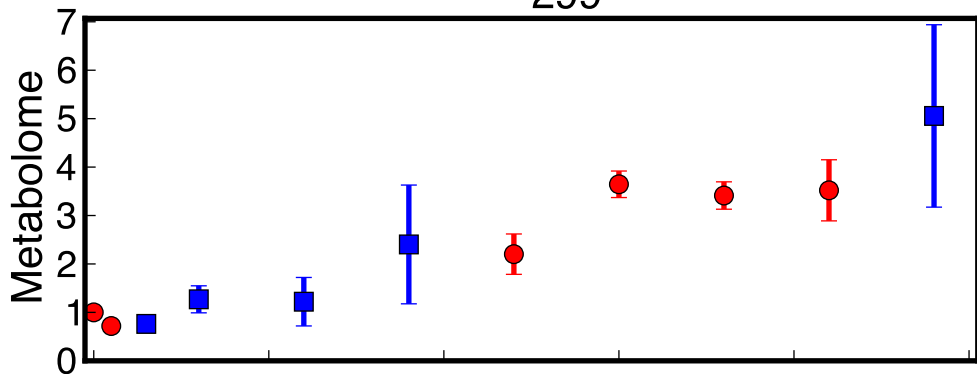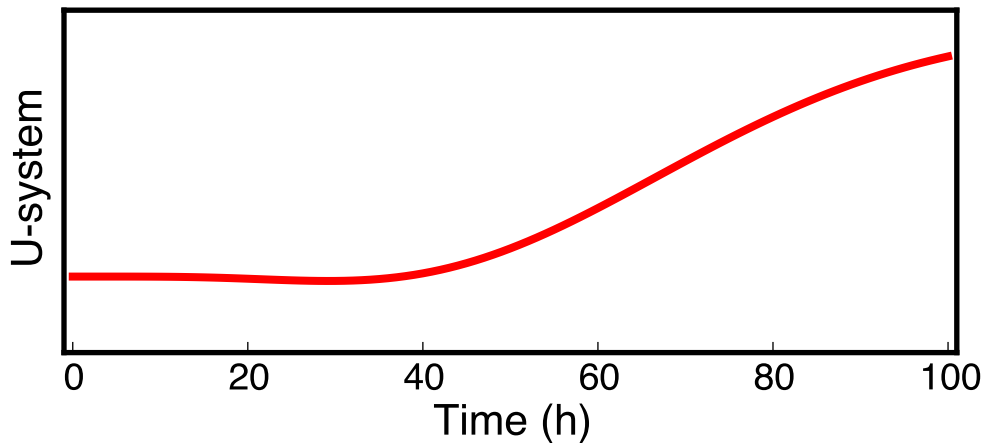

$X_{300}$

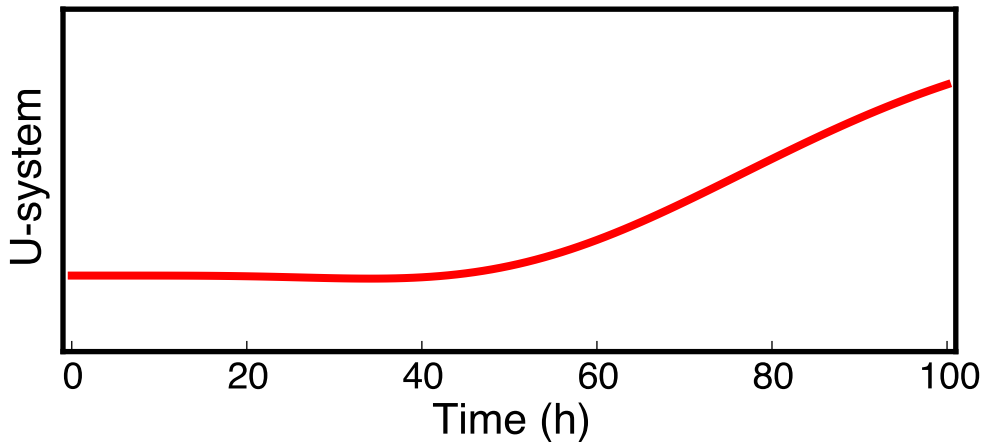

$X_{301}$

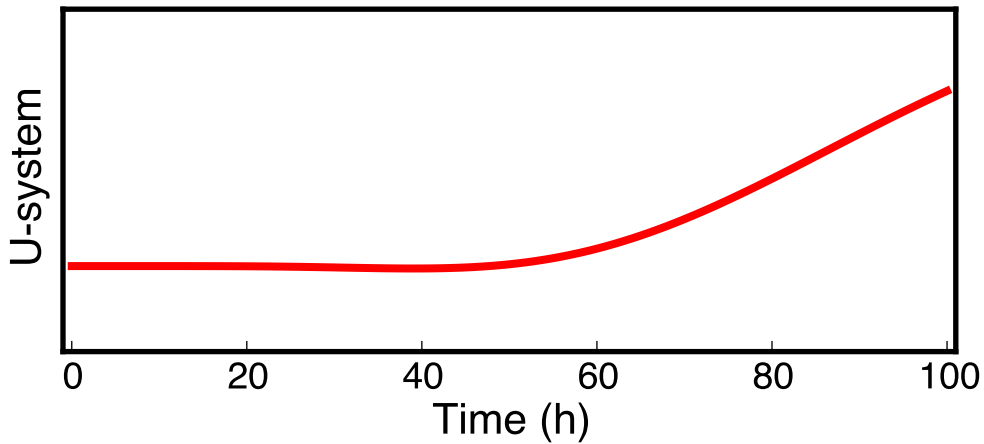

$X_{302}$

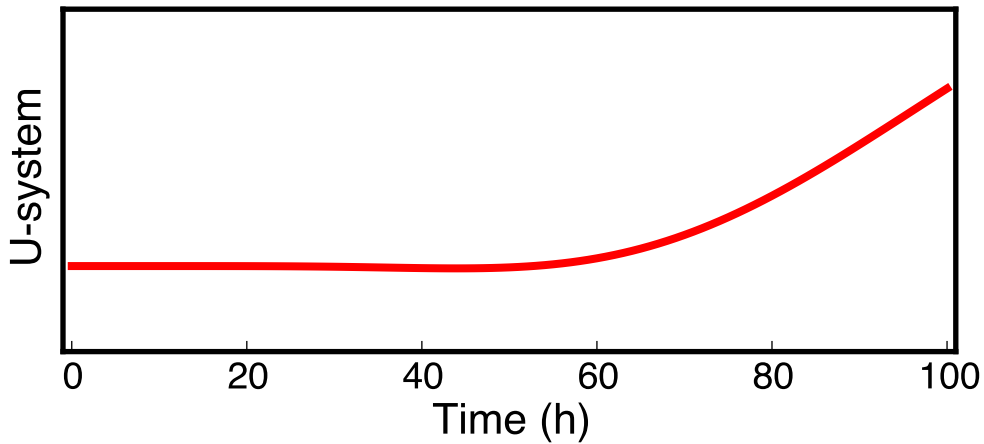

$X_{303}$

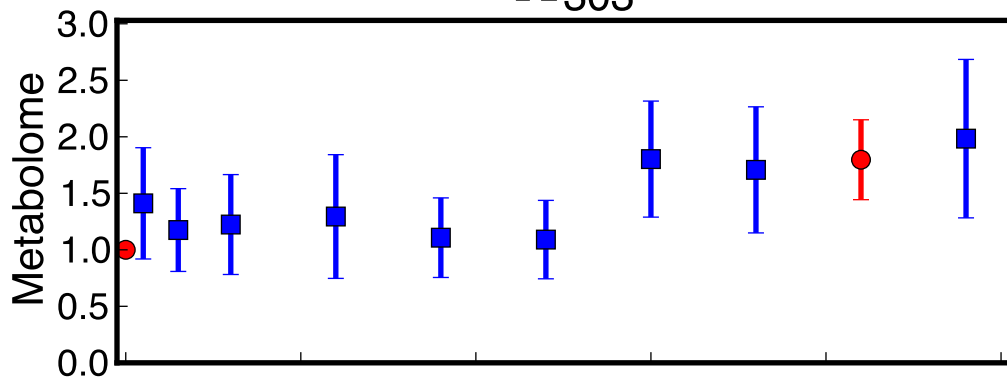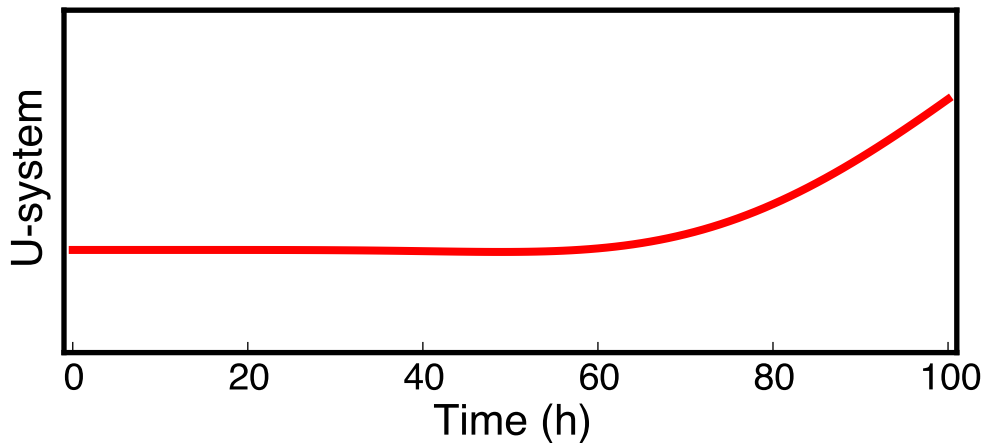

$X_{304}$

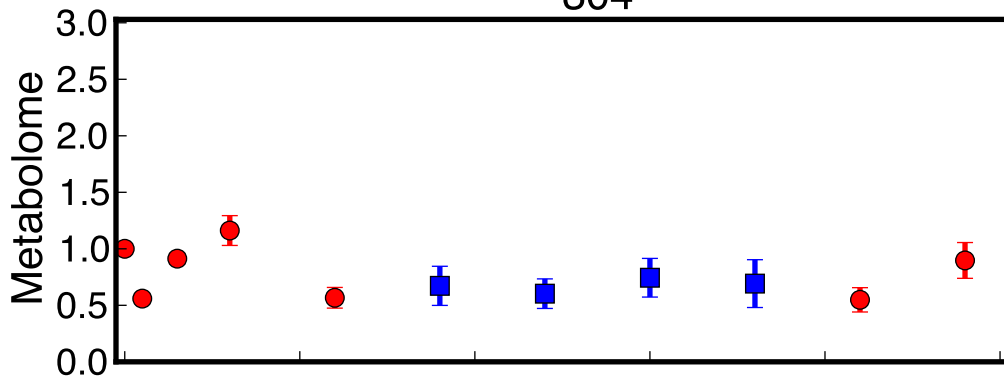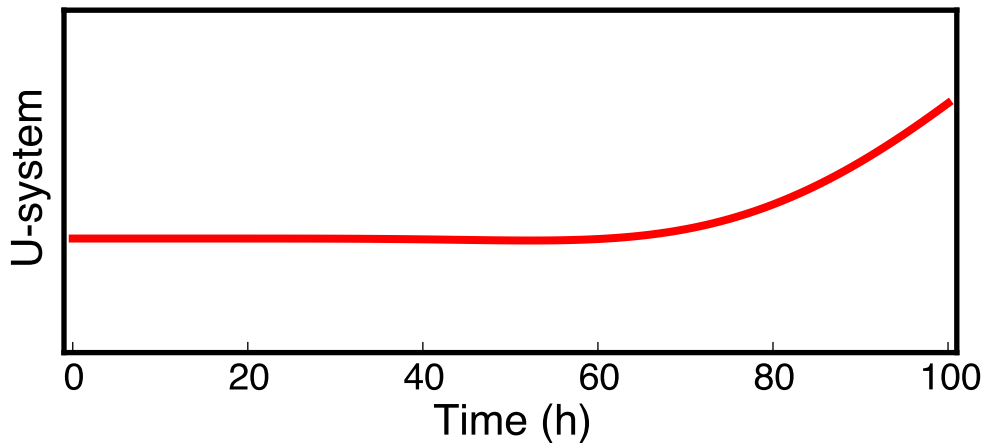



$X_{305}$

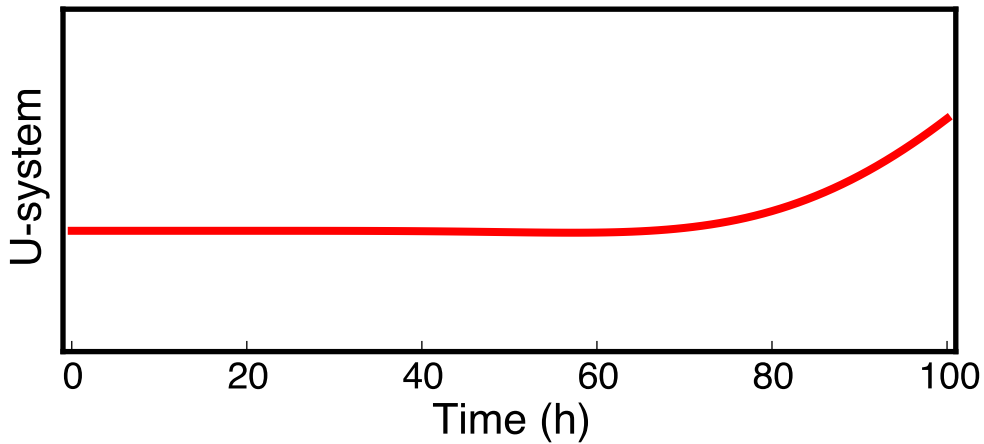

$X_{306}$

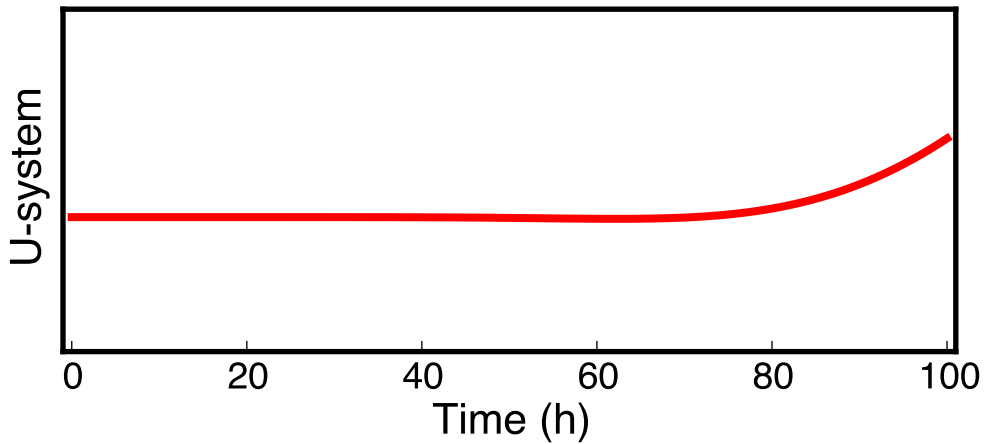

$X_{307}$

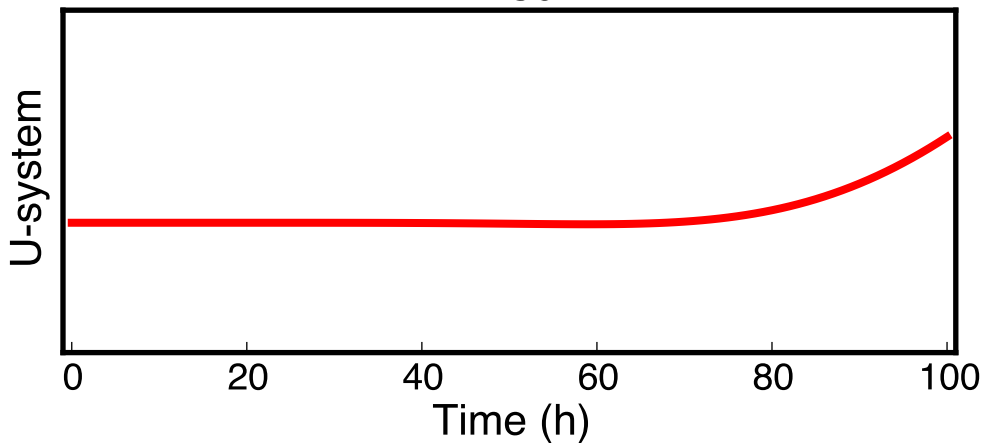

$X_{308}$

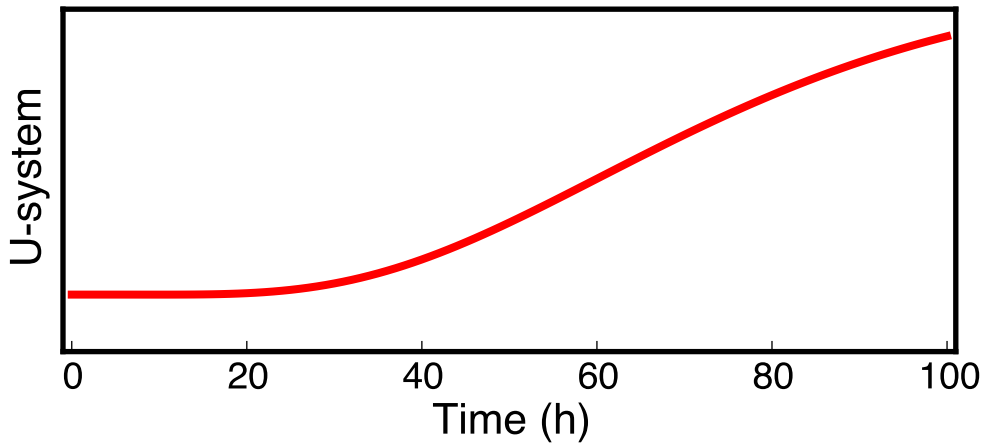

$X_{309}$

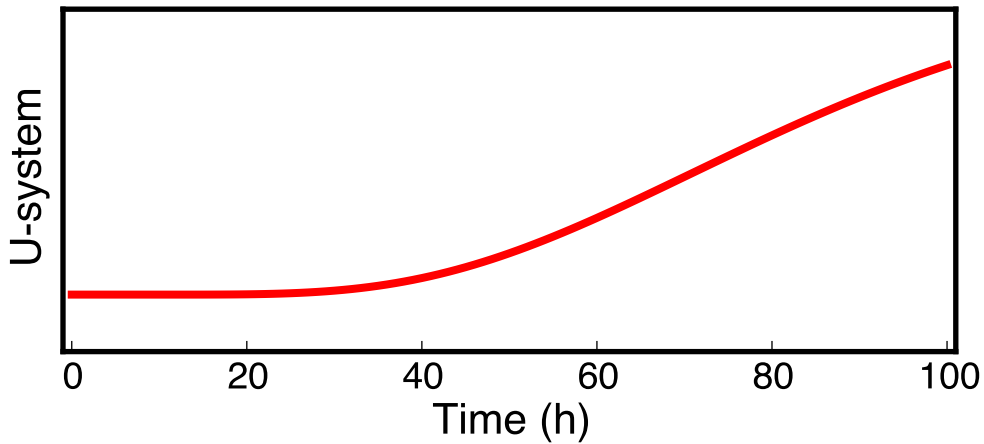

$X_{310}$

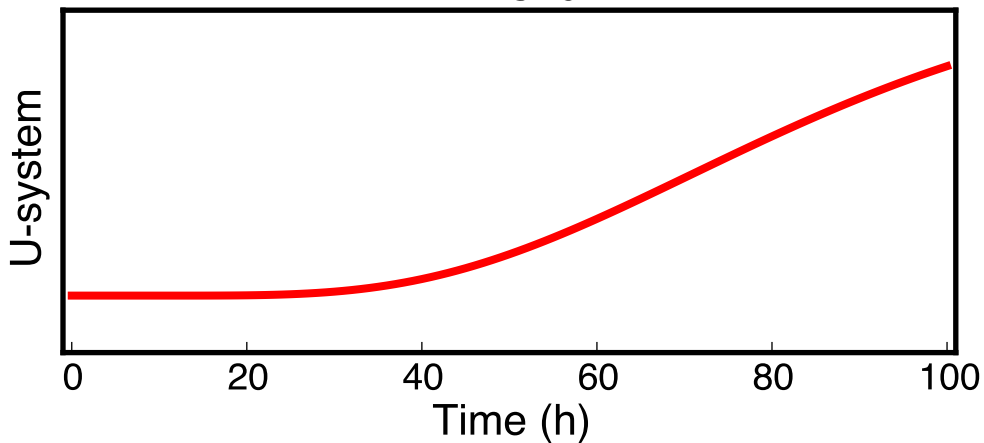

$X_{311}$

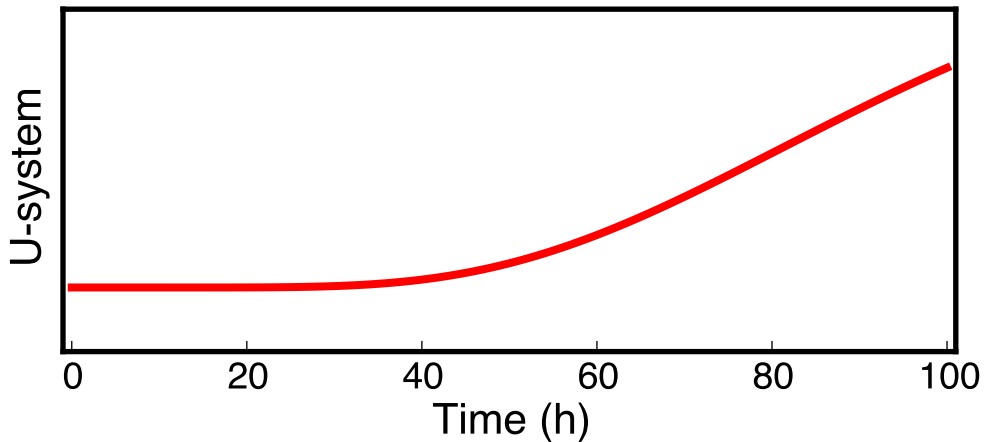

$X_{312}$

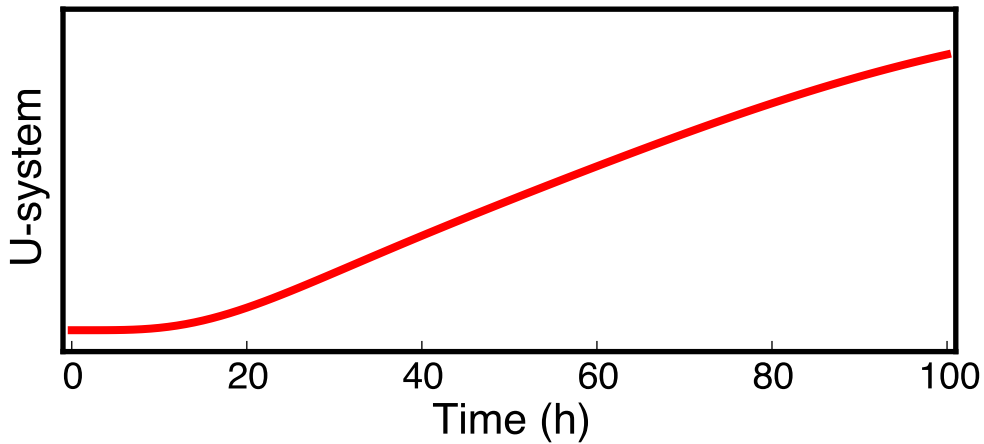



$X_{313}$

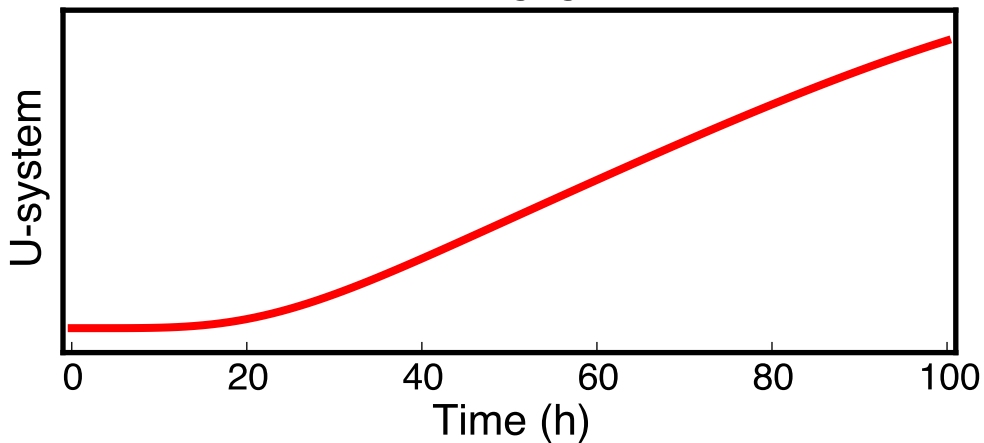

$X_{314}$

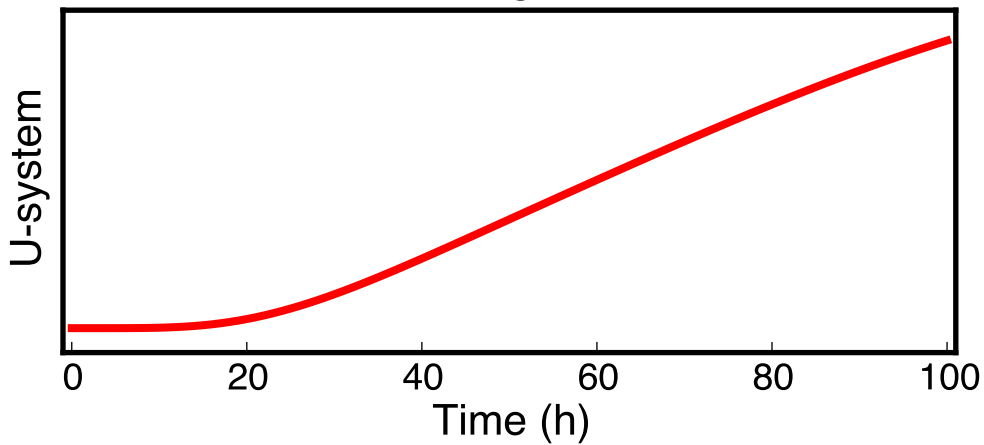

$X_{315}$

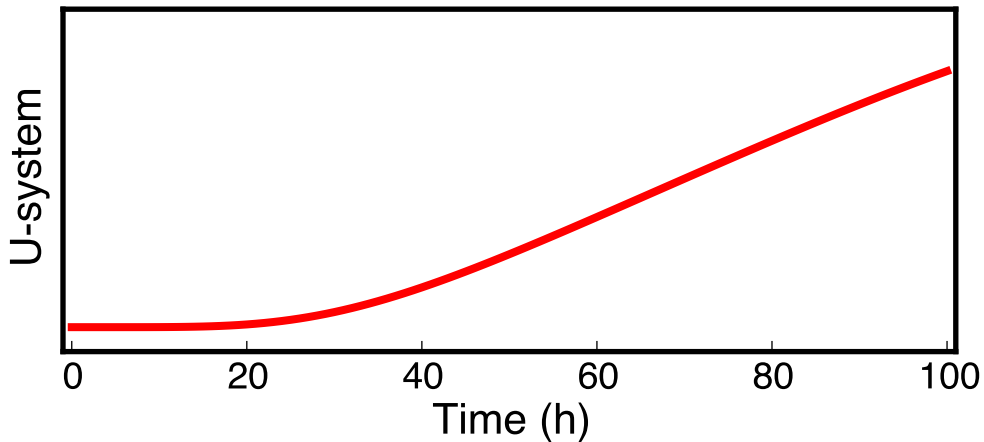

$X_{316}$

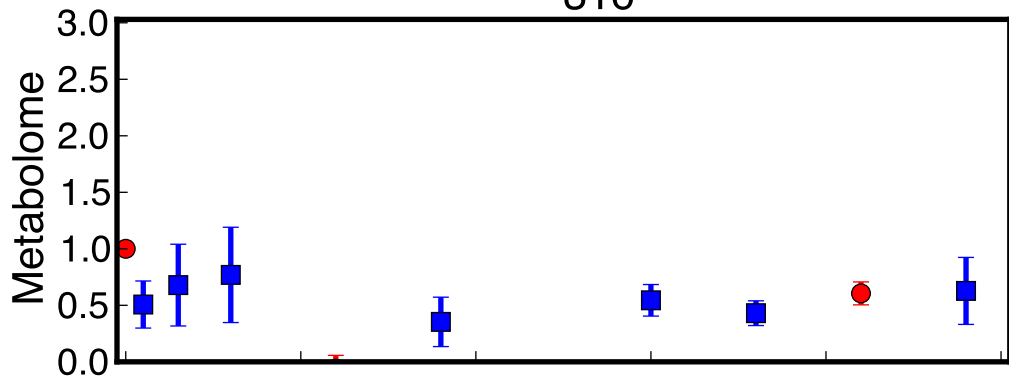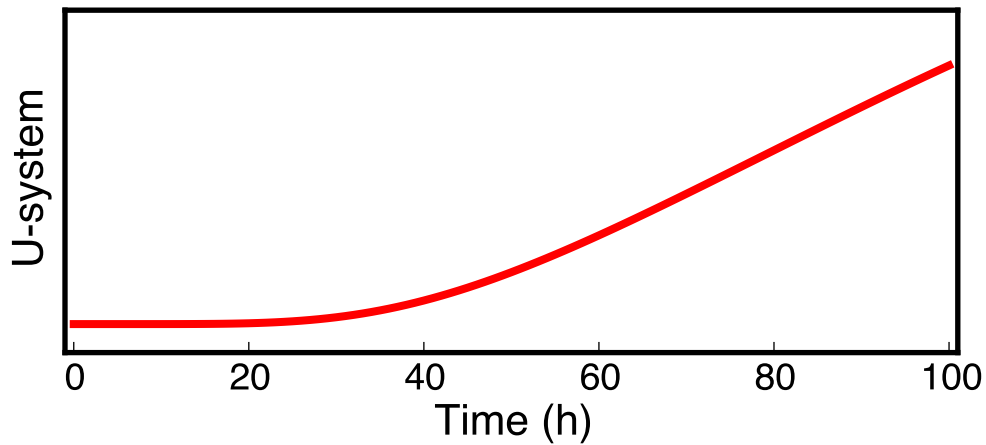

$X_{317}$

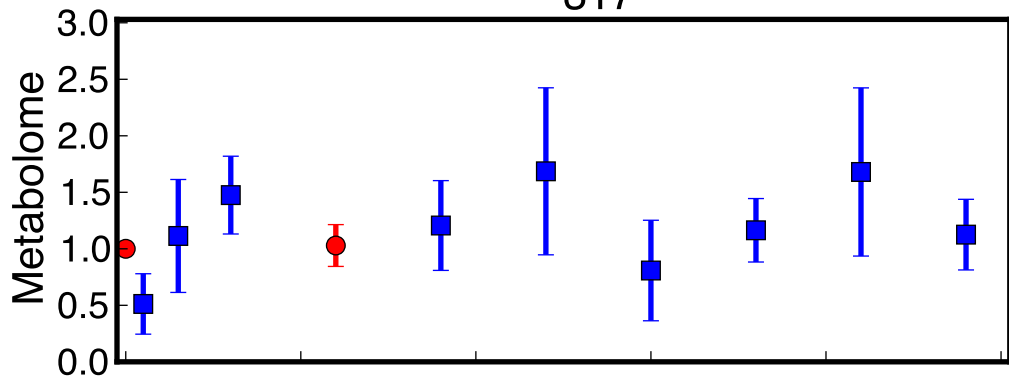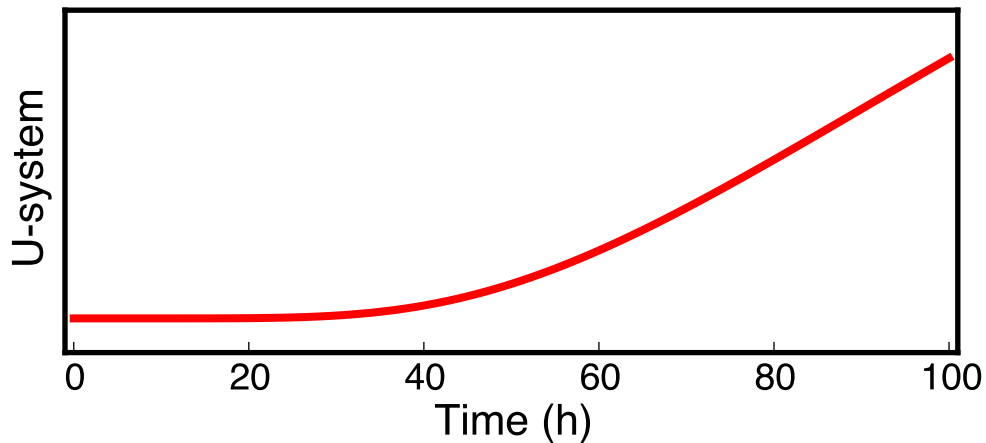

$X_{318}$

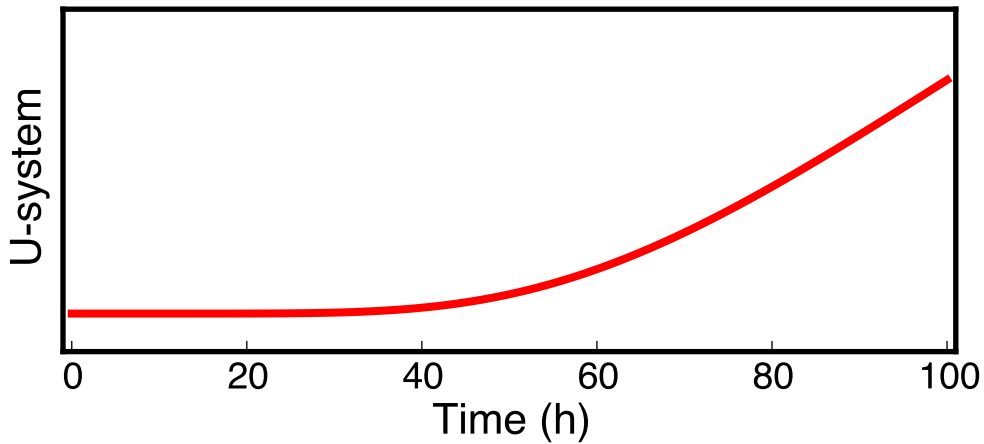

$X_{319}$

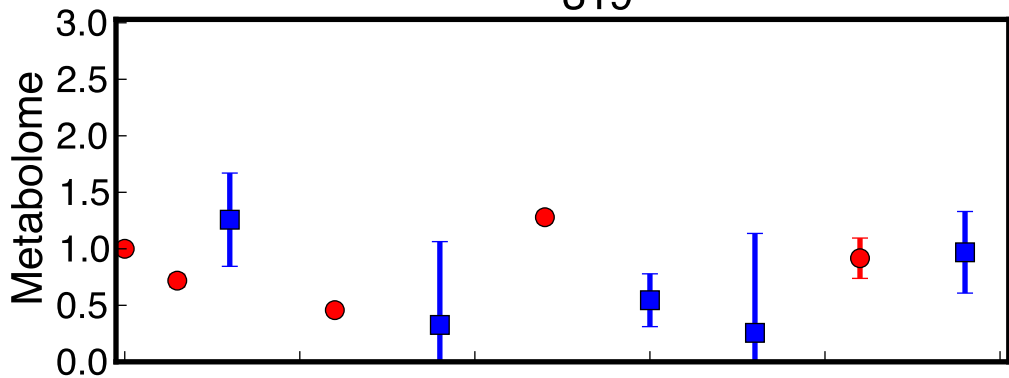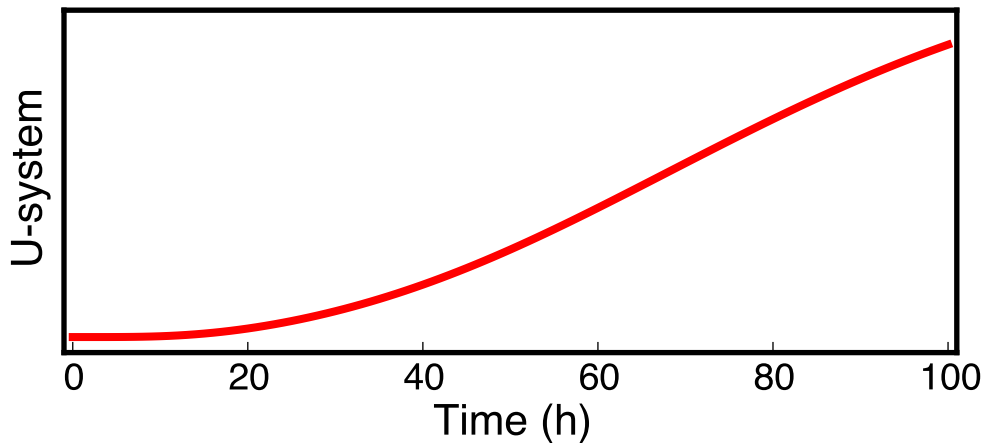

$X_{320}$

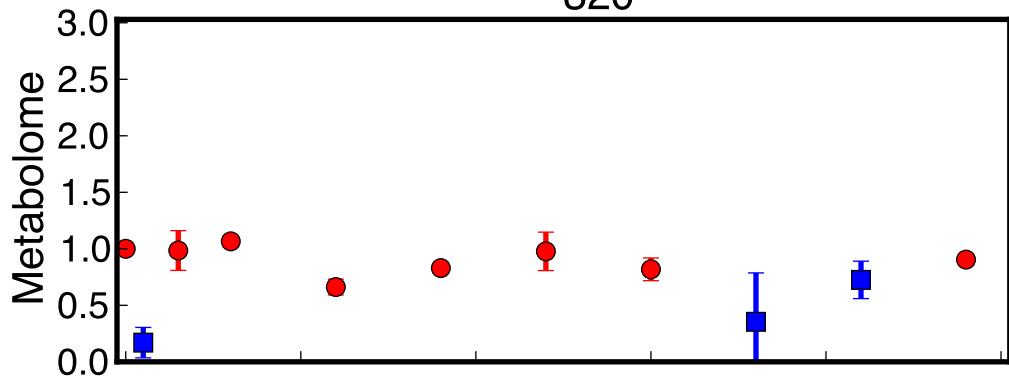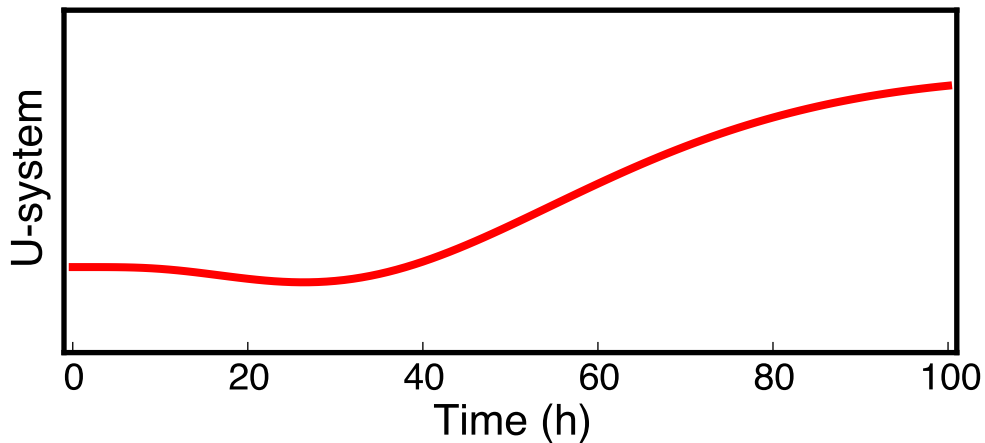



$X_{321}$

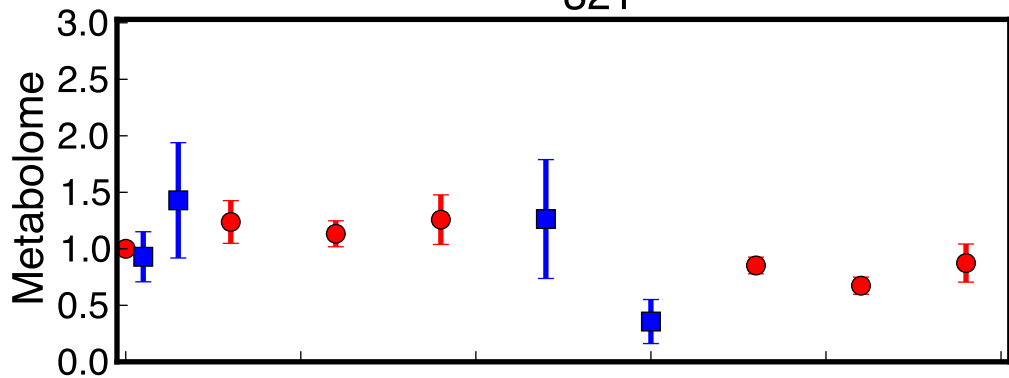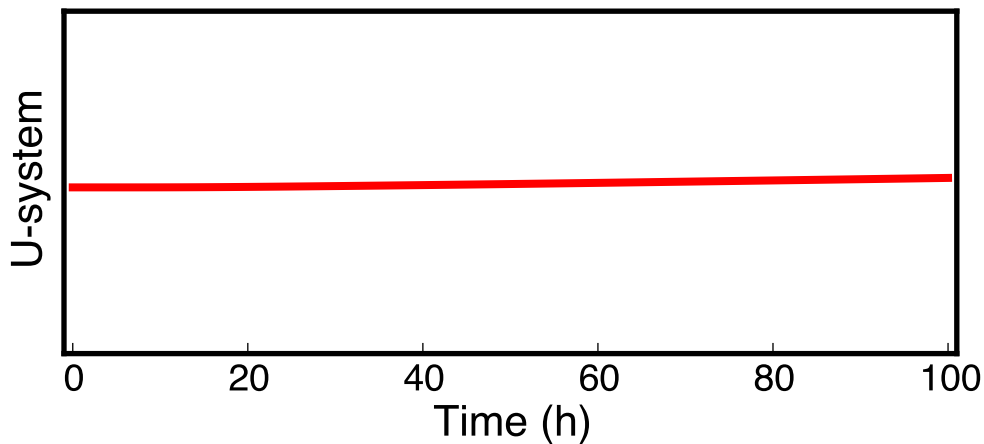

$X_{322}$

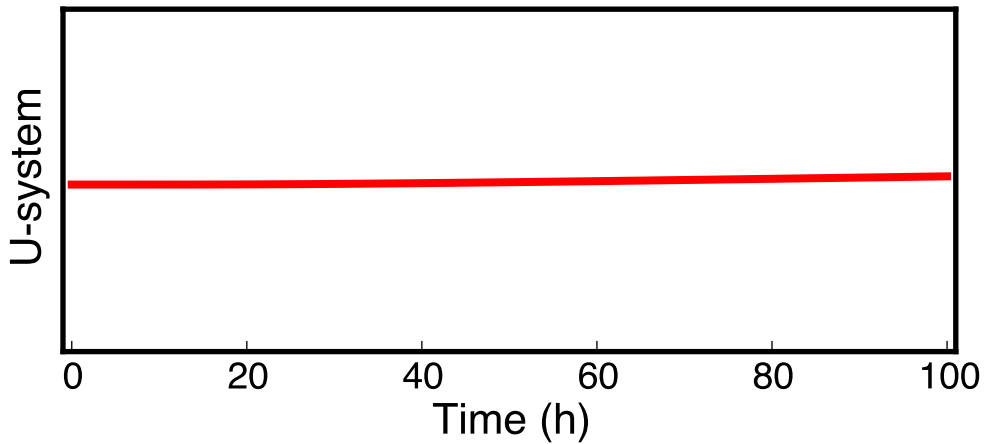

$X_{323}$

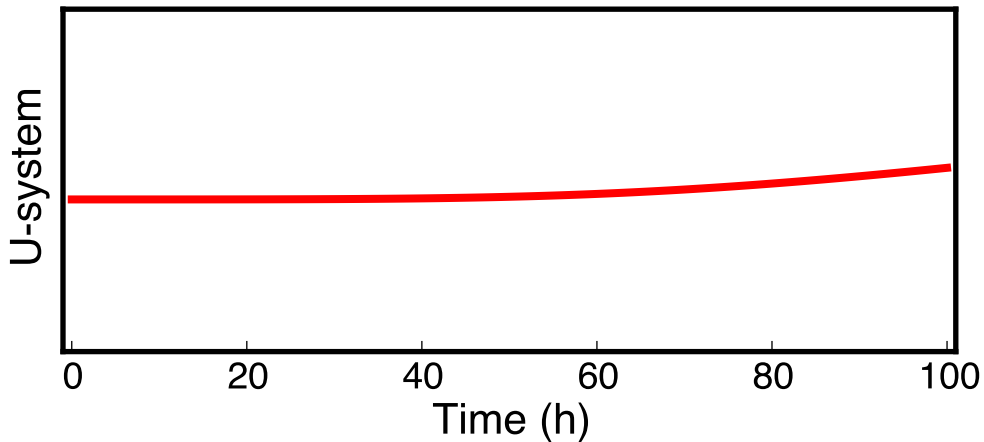

$X_{324}$

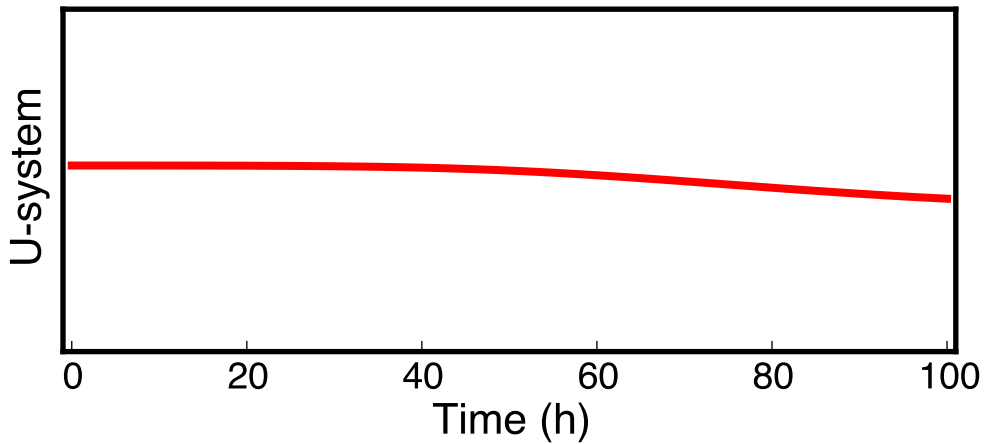

$X_{325}$

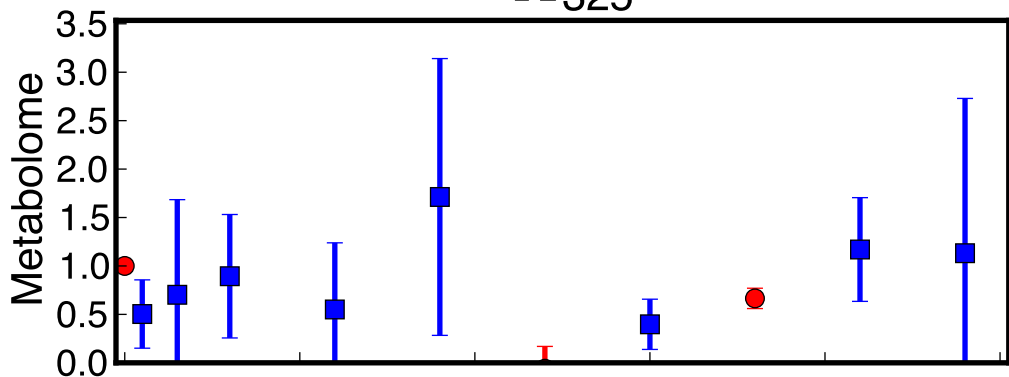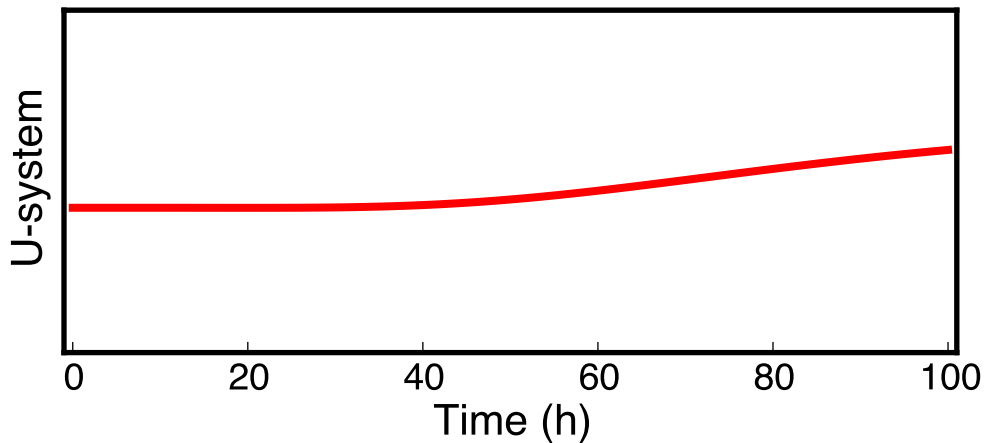

$X_{326}$

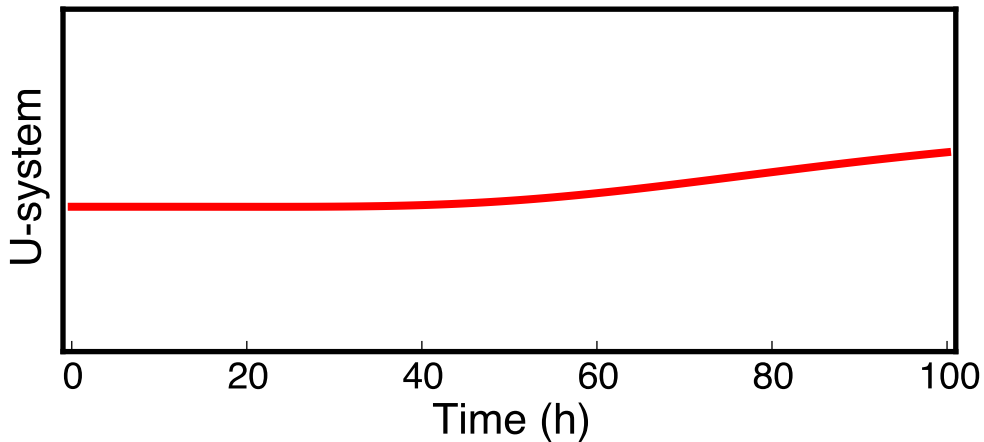

$X_{327}$

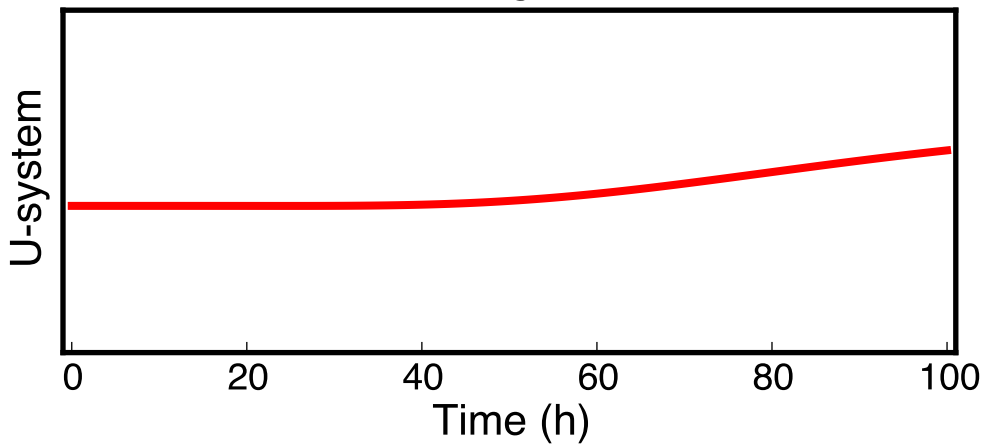

$X_{328}$

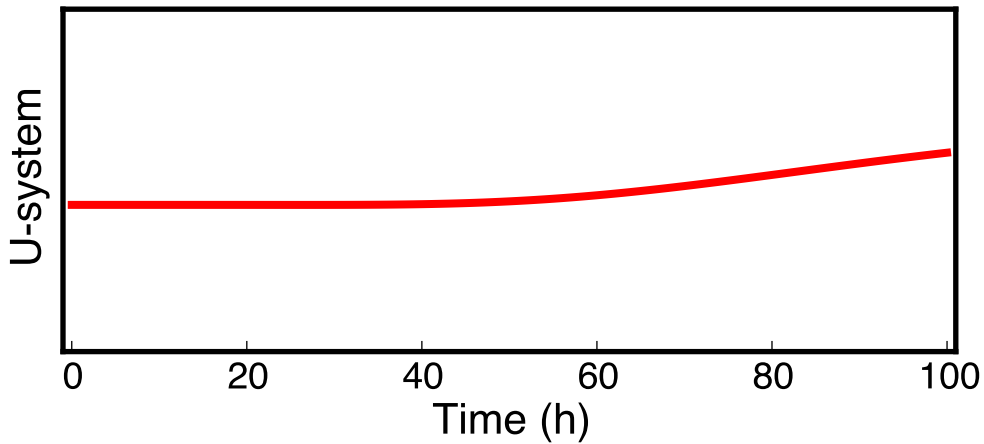



$X_{329}$

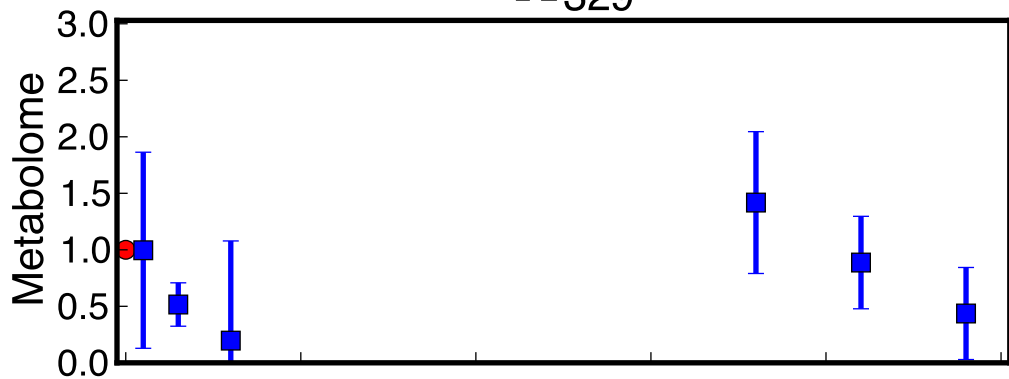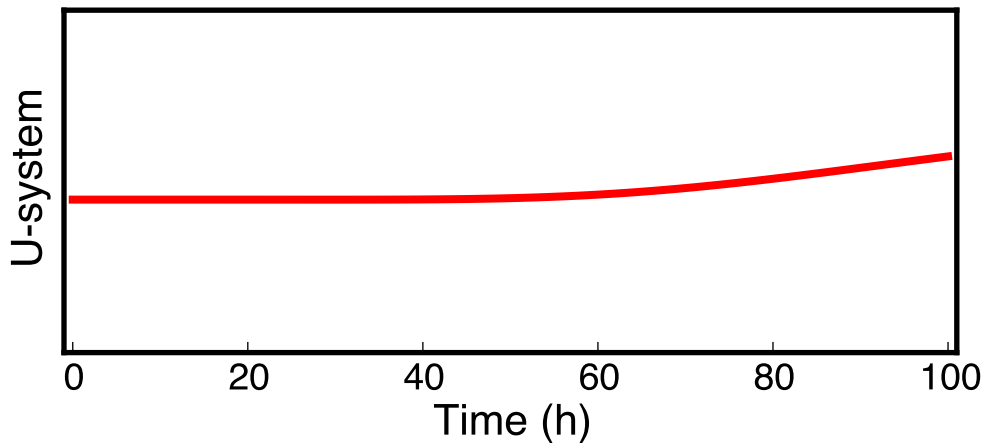

$X_{330}$

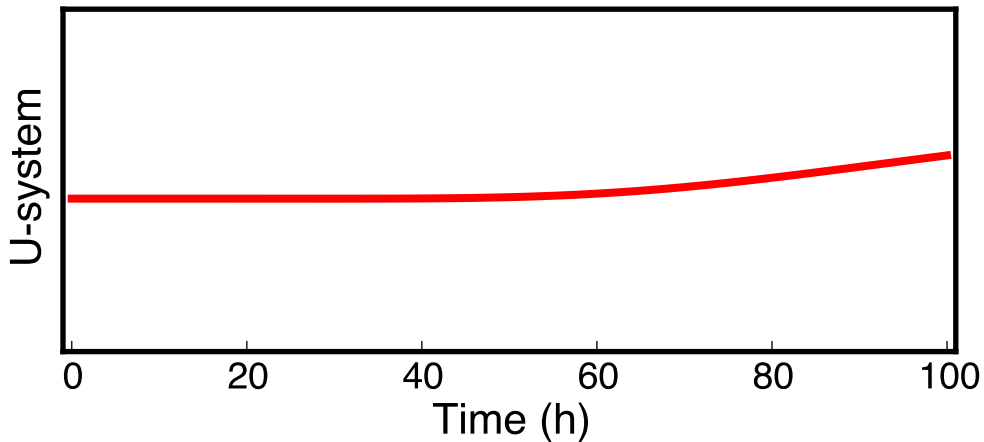

$X_{331}$

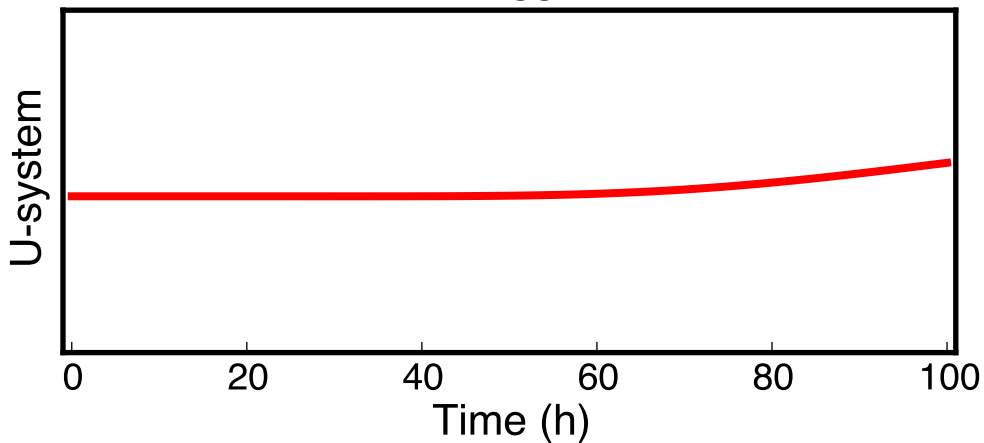

$X_{332}$

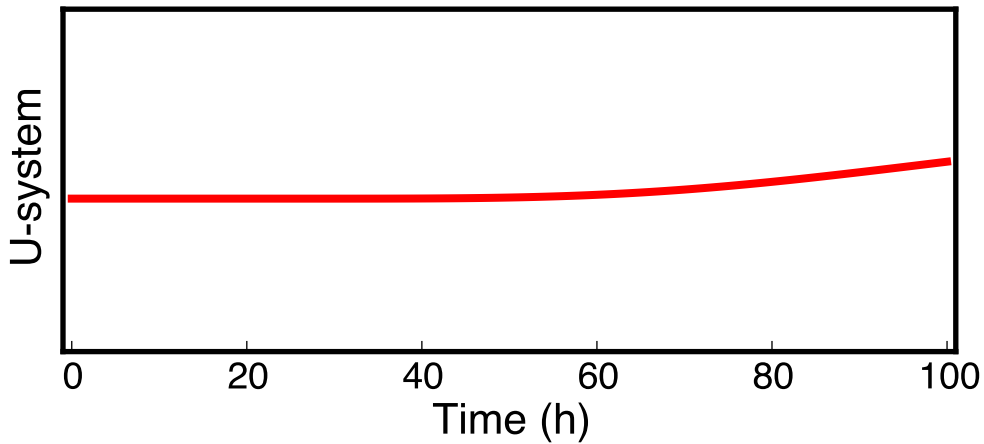

$X_{333}$

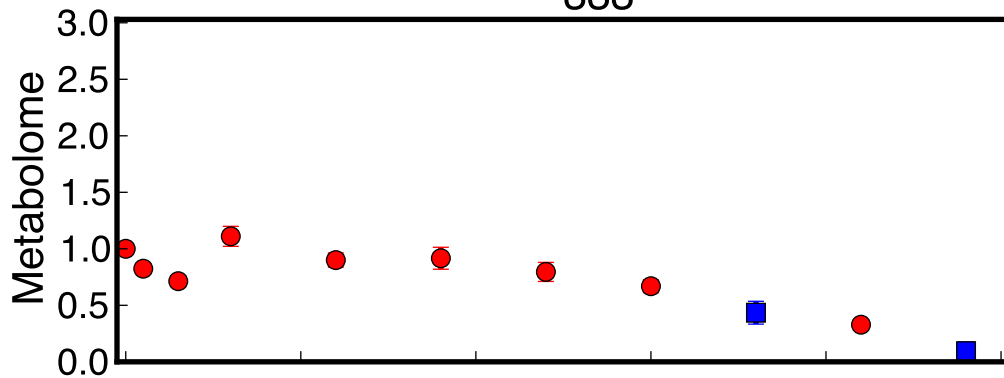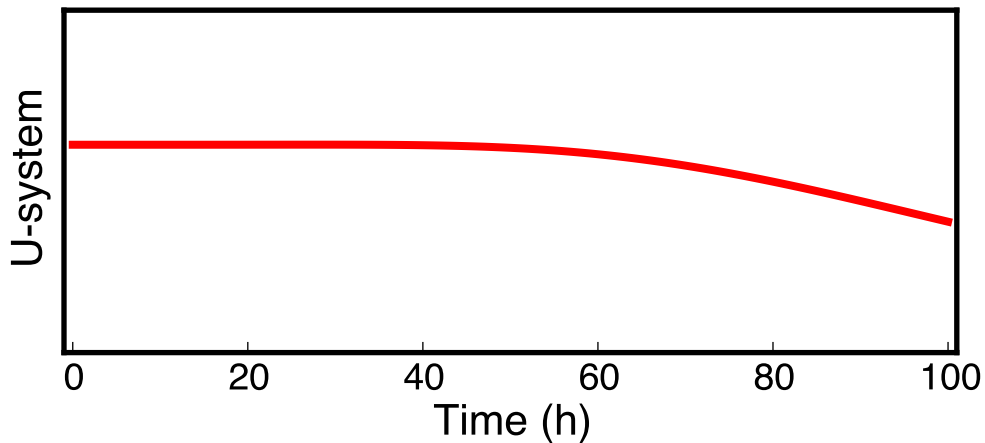

$X_{334}$

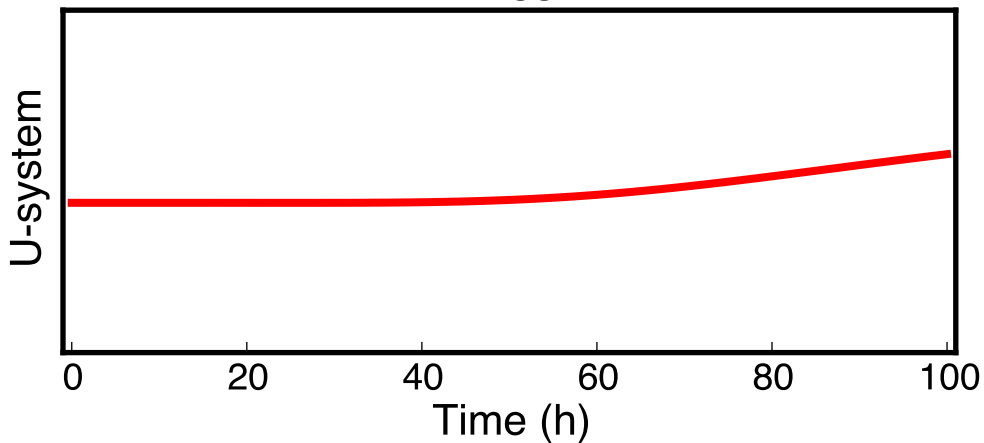

$X_{335}$

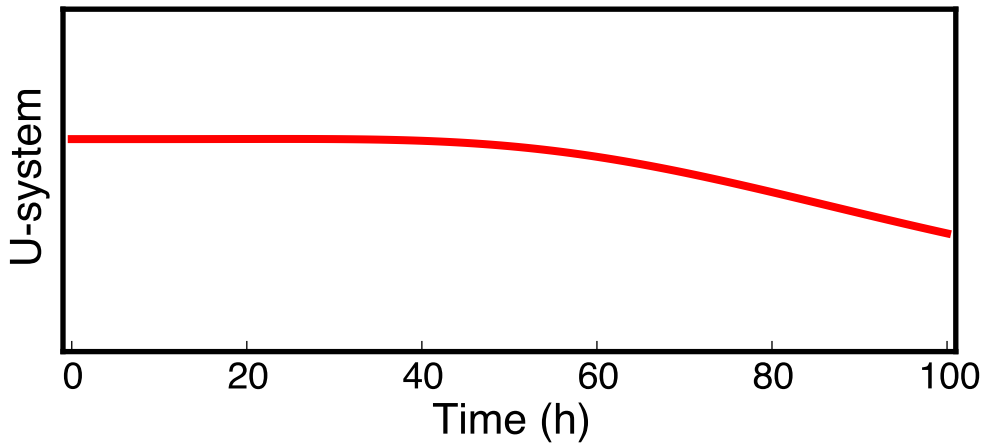

$X_{336}$

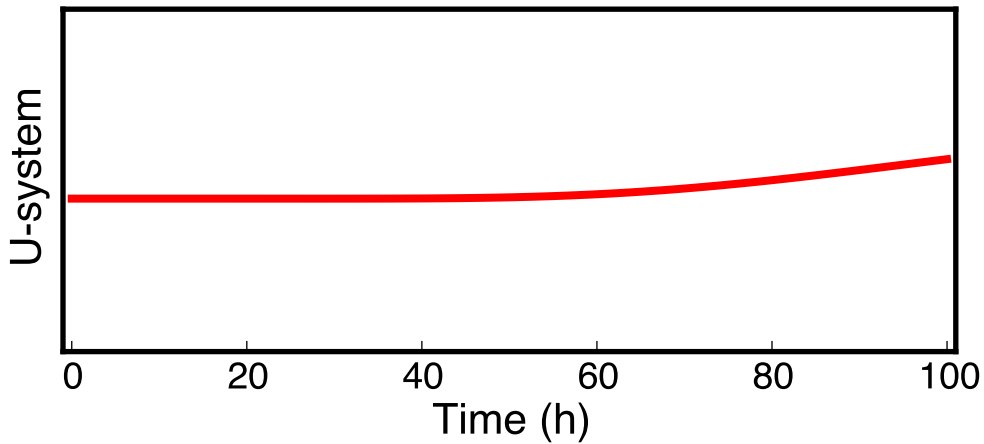



$X_{337}$

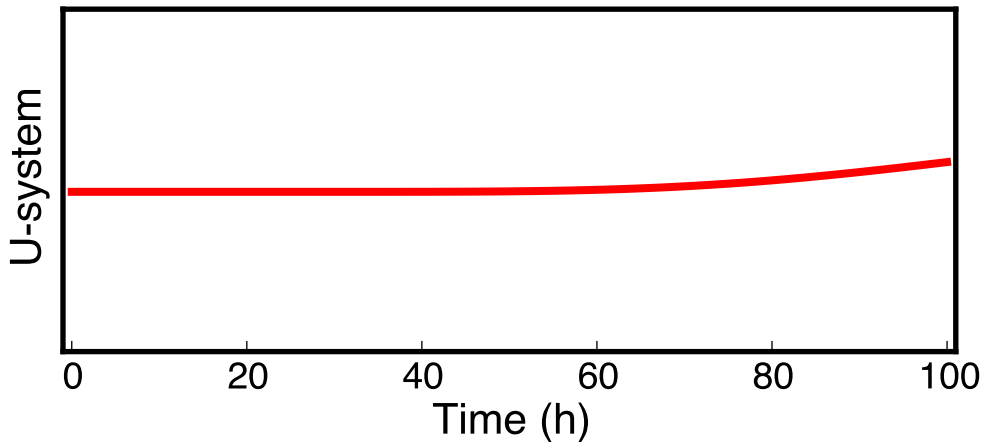

$X_{338}$

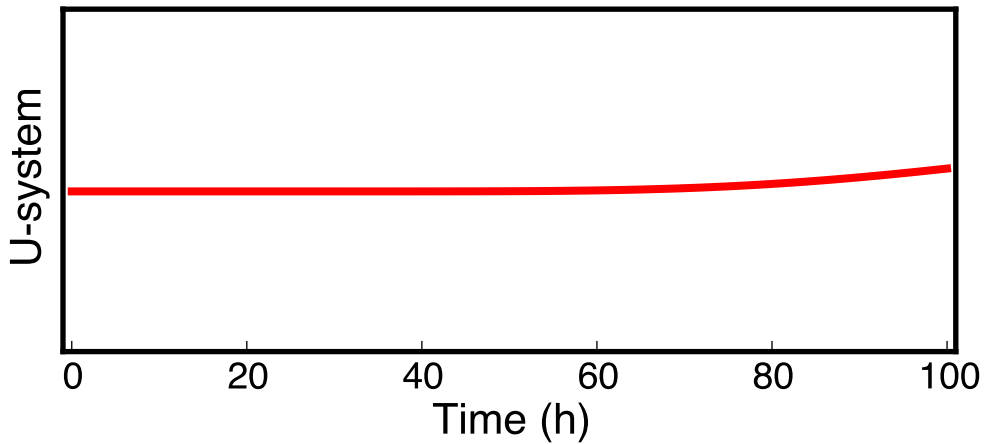

$X_{339}$

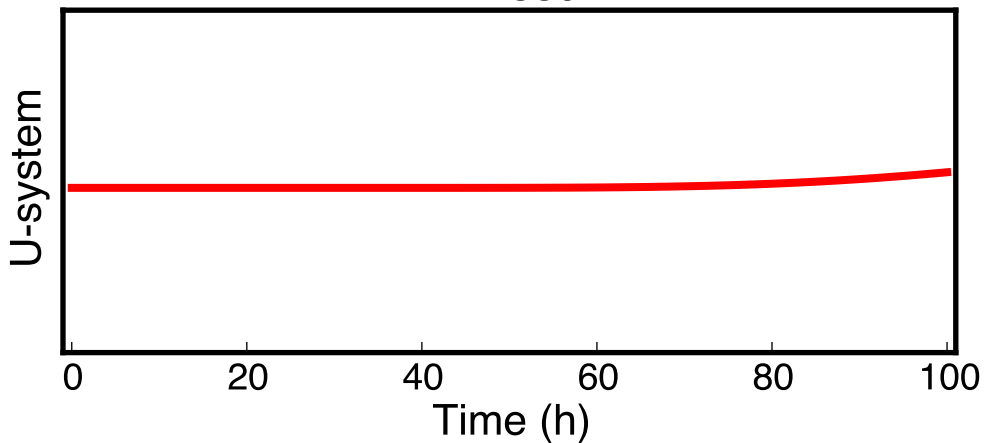

$X_{340}$

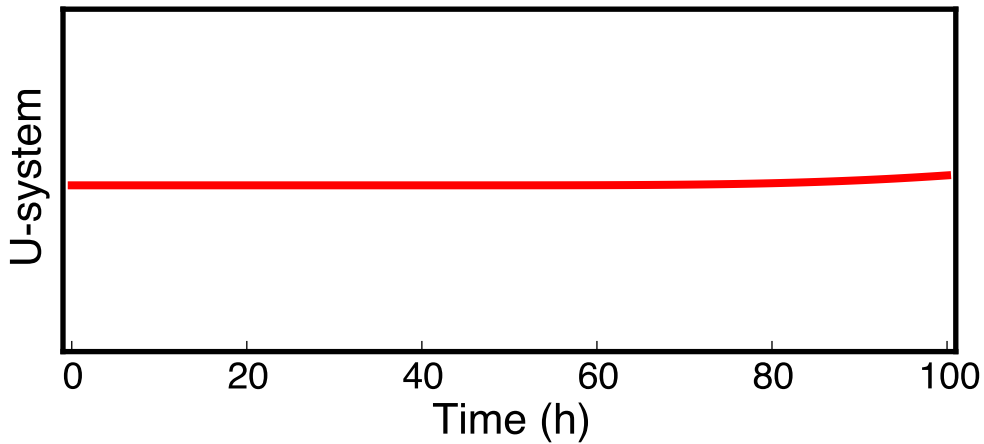

$X_{341}$

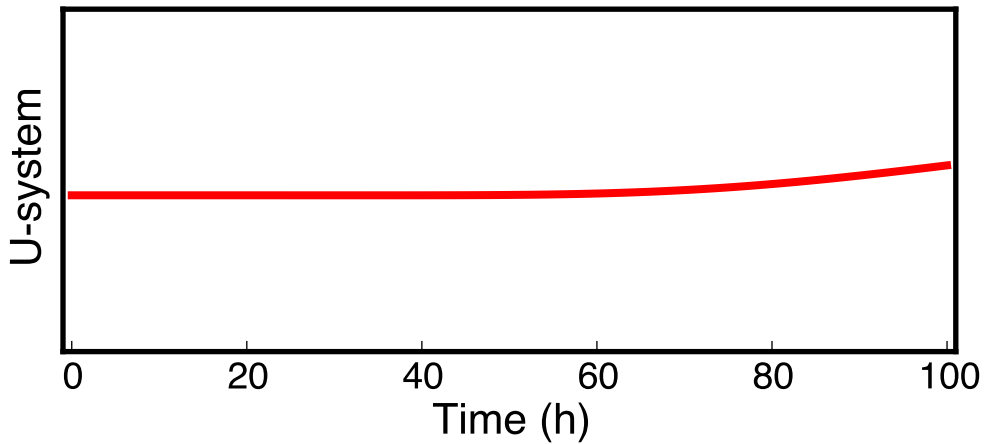

$X_{342}$

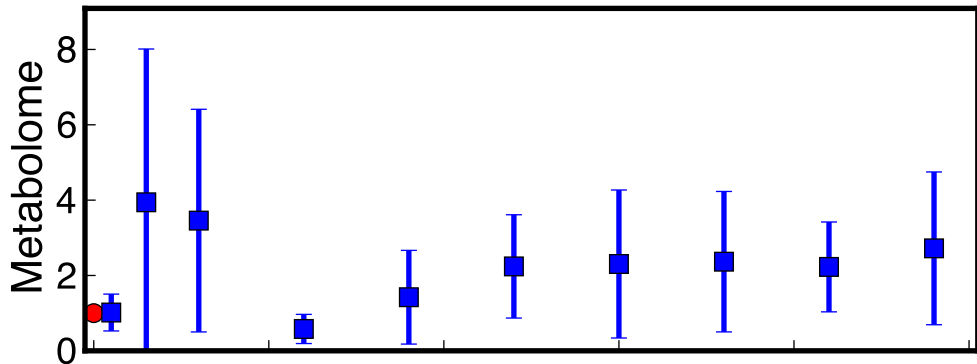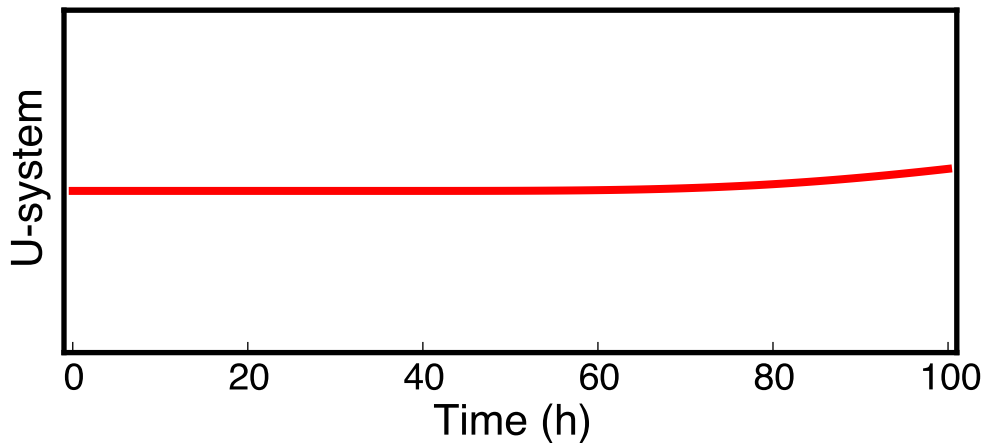

$X_{343}$

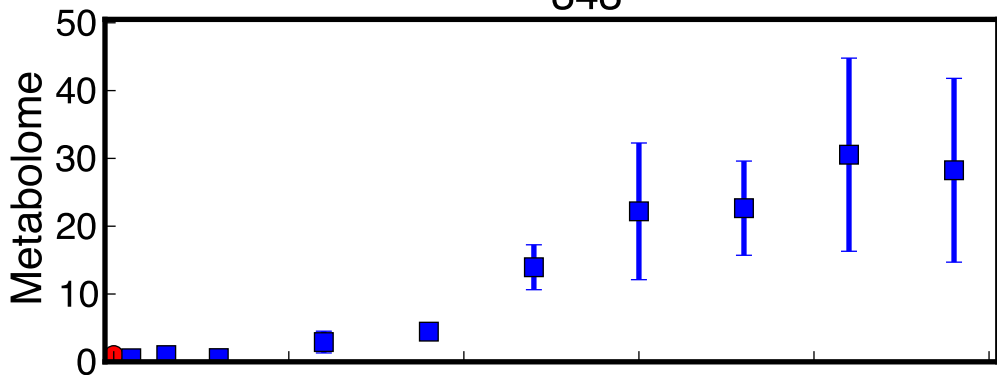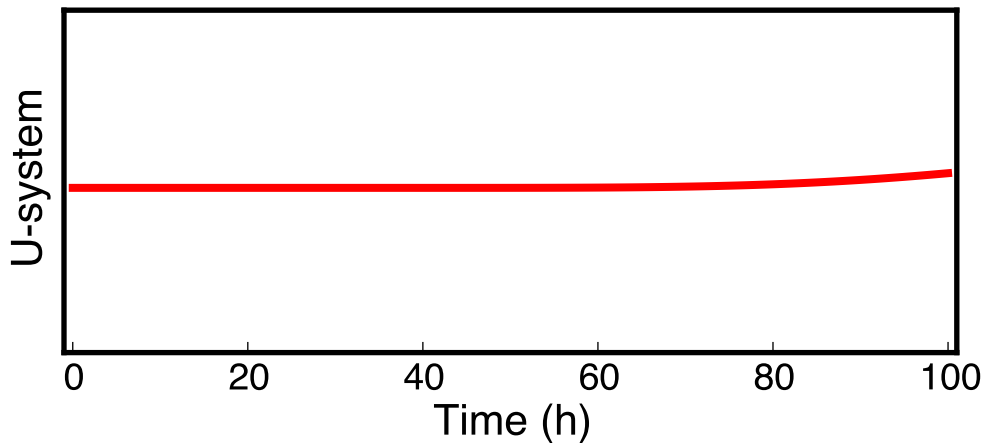

$X_{344}$

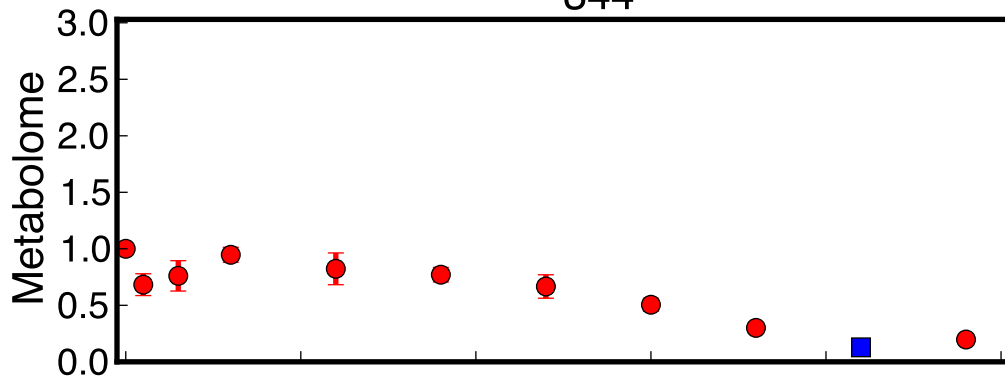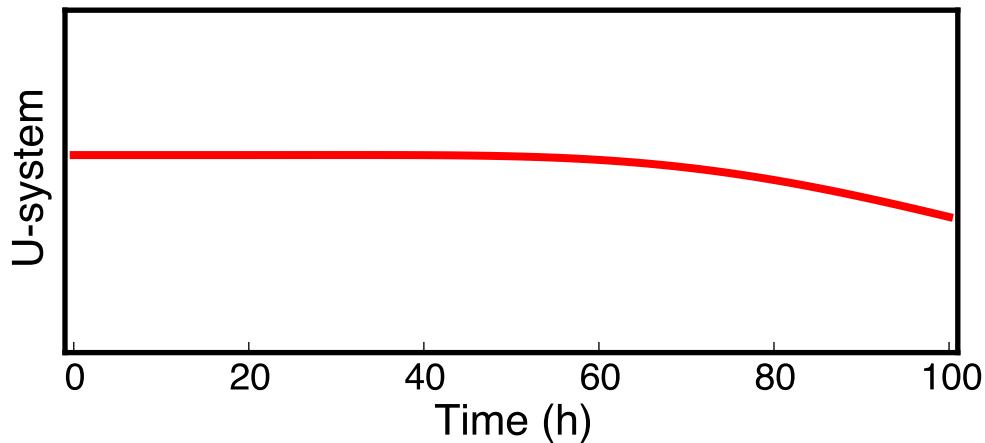



$X_{345}$

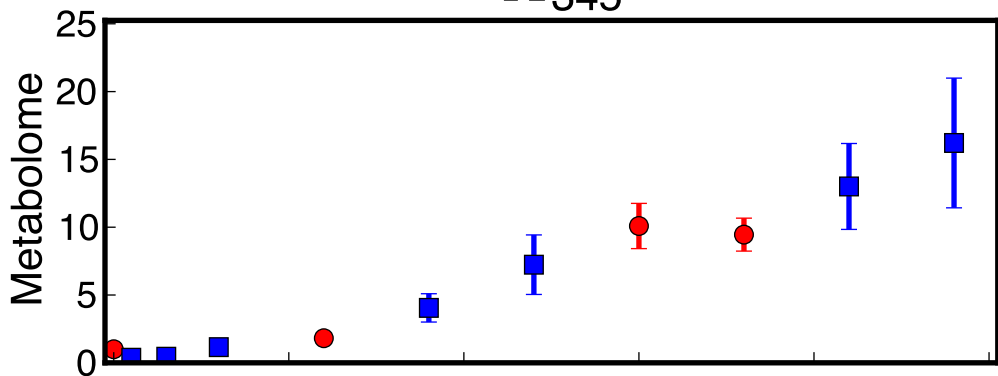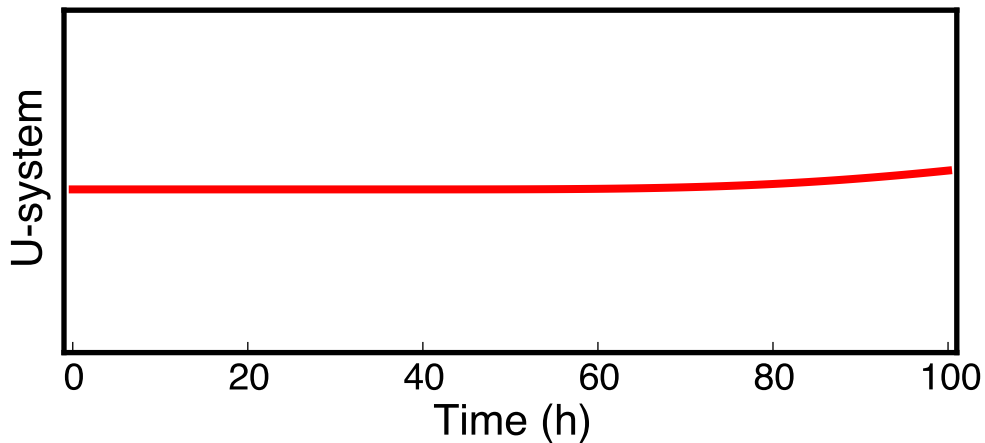

$X_{346}$

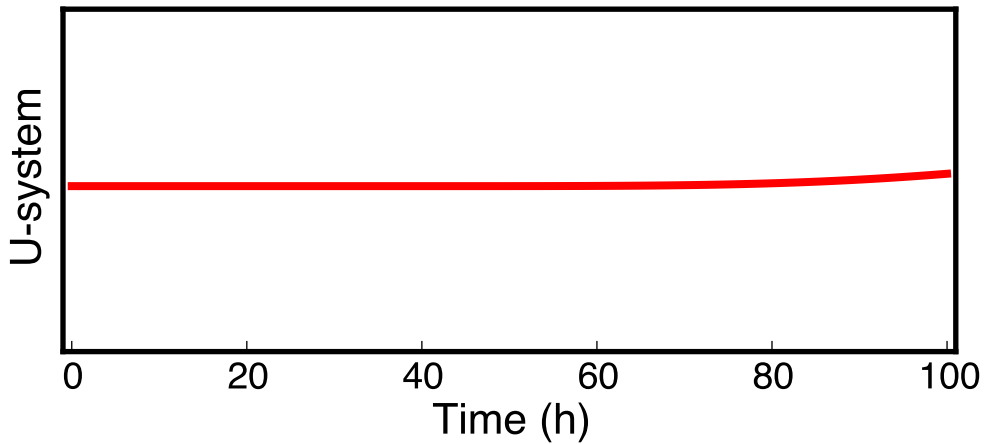

$X_{347}$

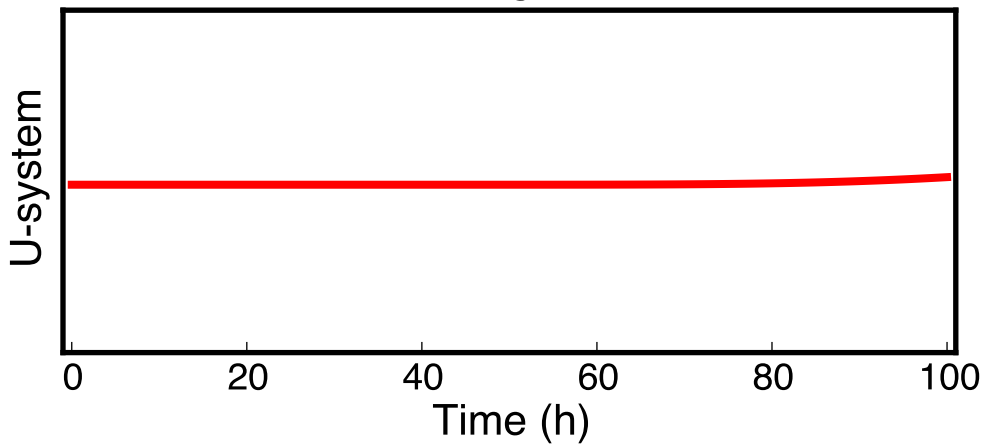

$X_{348}$

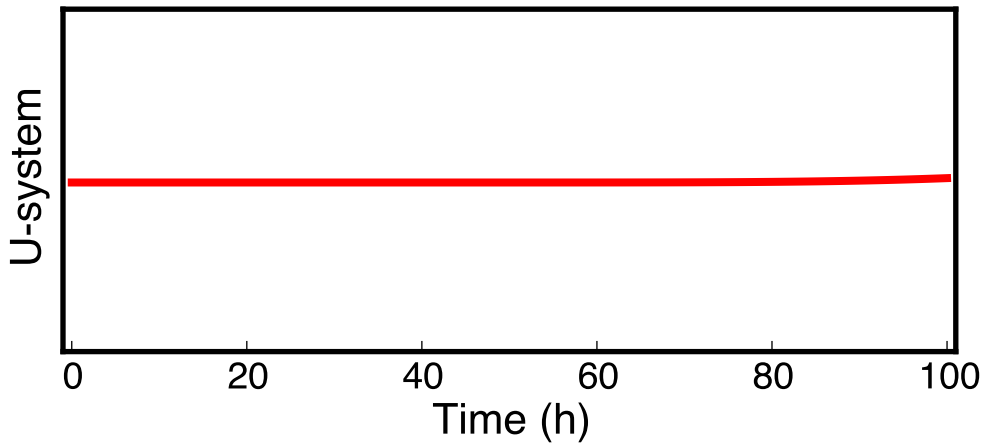

$X_{349}$

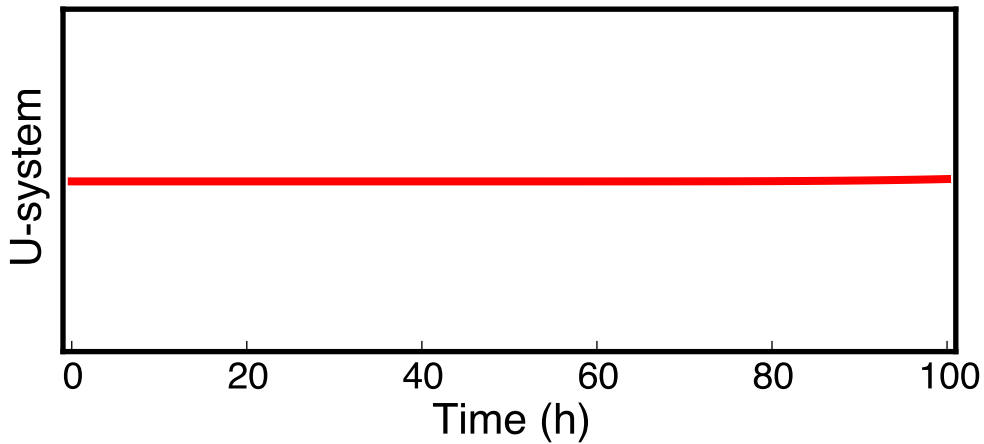

$X_{350}$

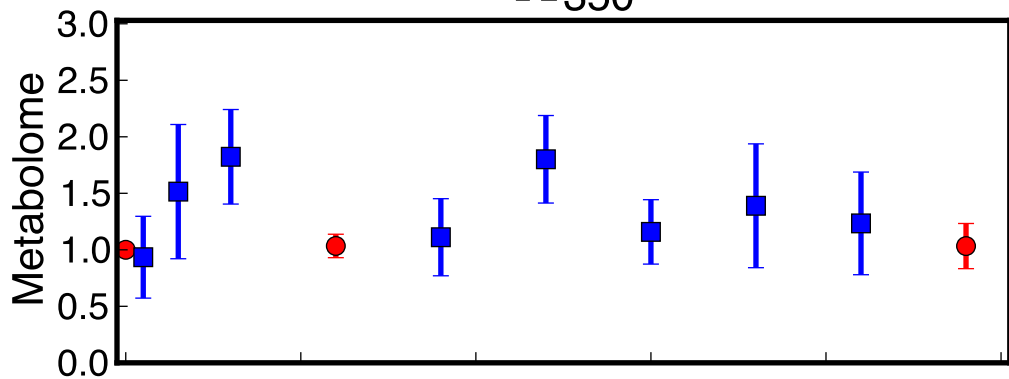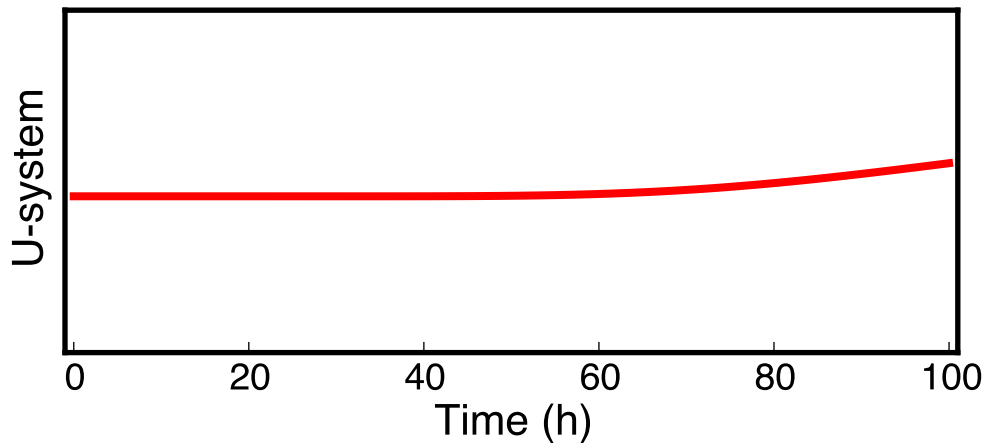

$X_{351}$

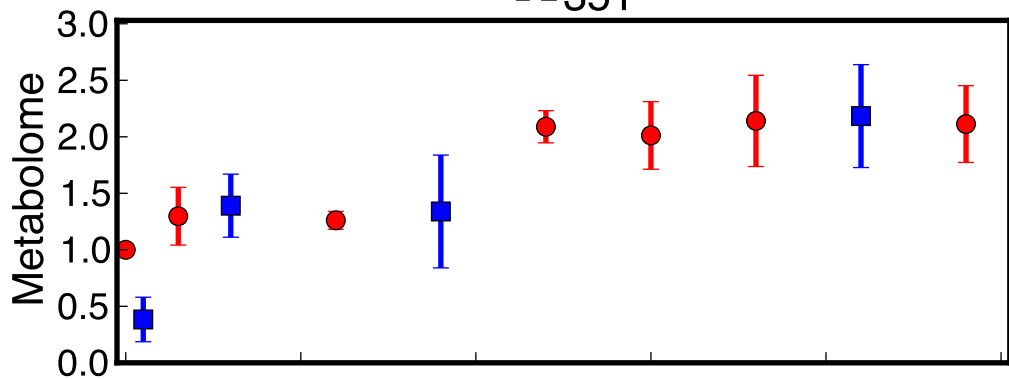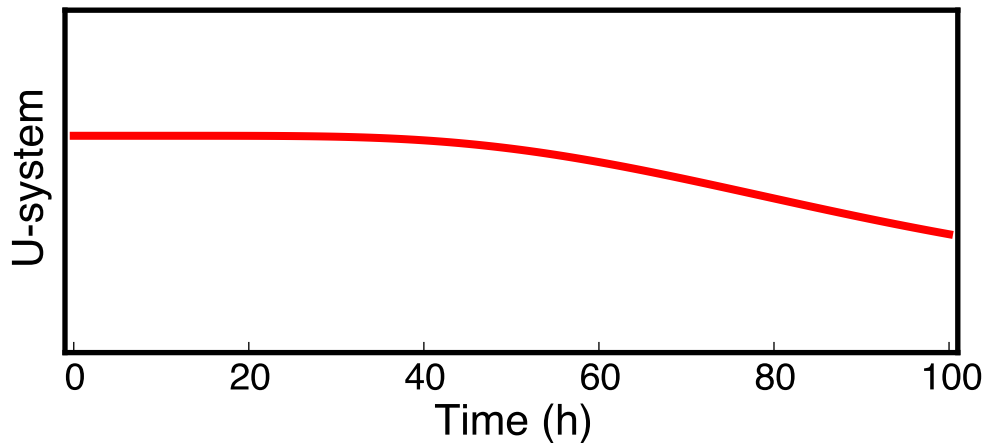

$X_{352}$

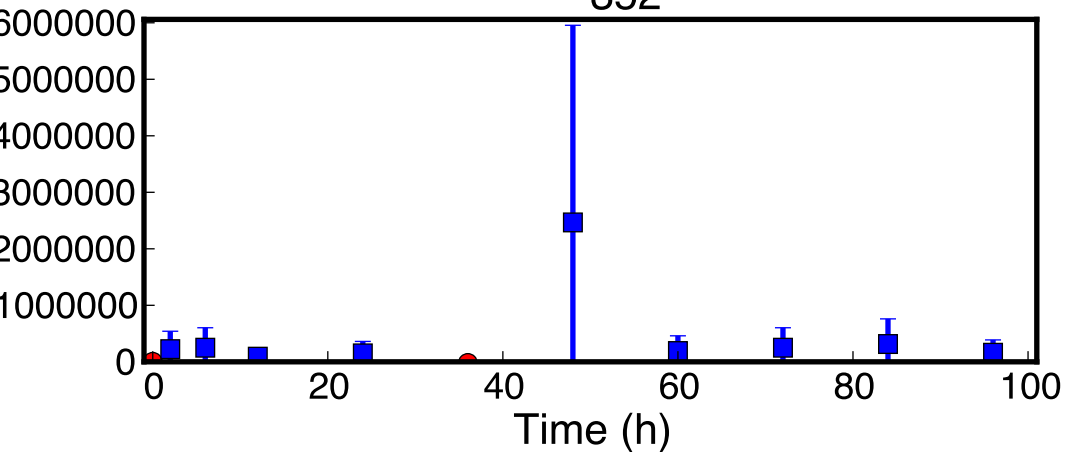



$X_{353}$

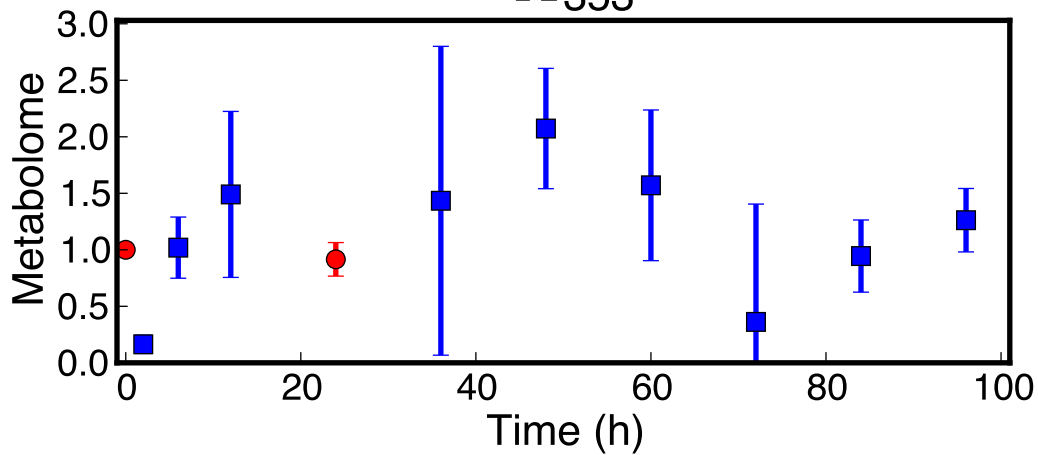

$X_{354}$

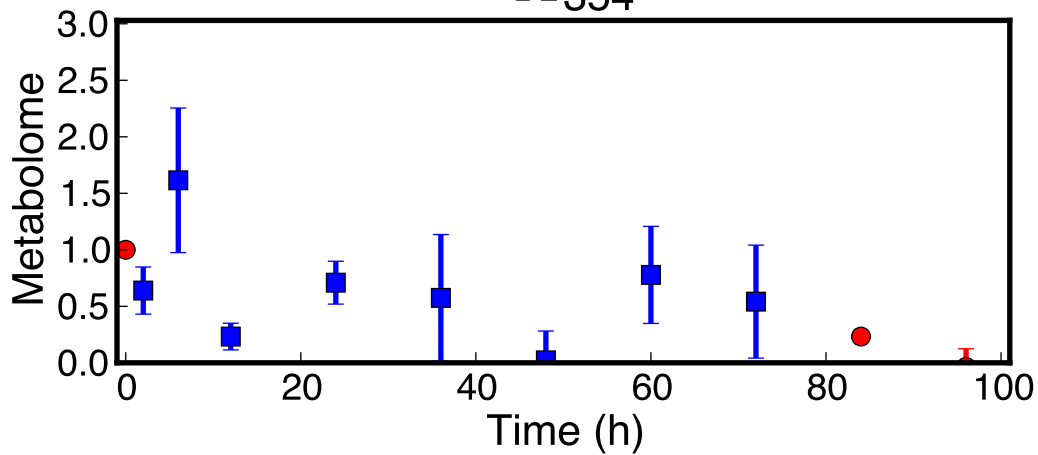

$X_{355}$

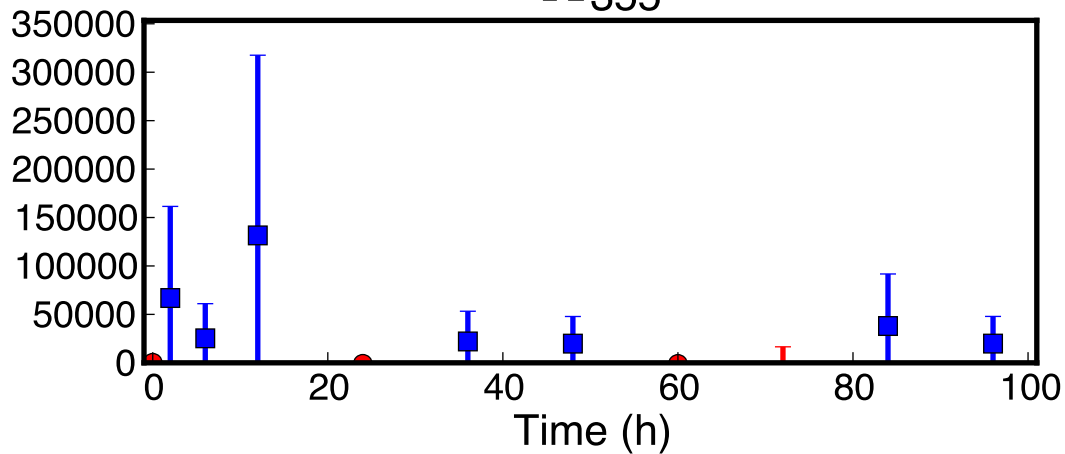

$X_{356}$

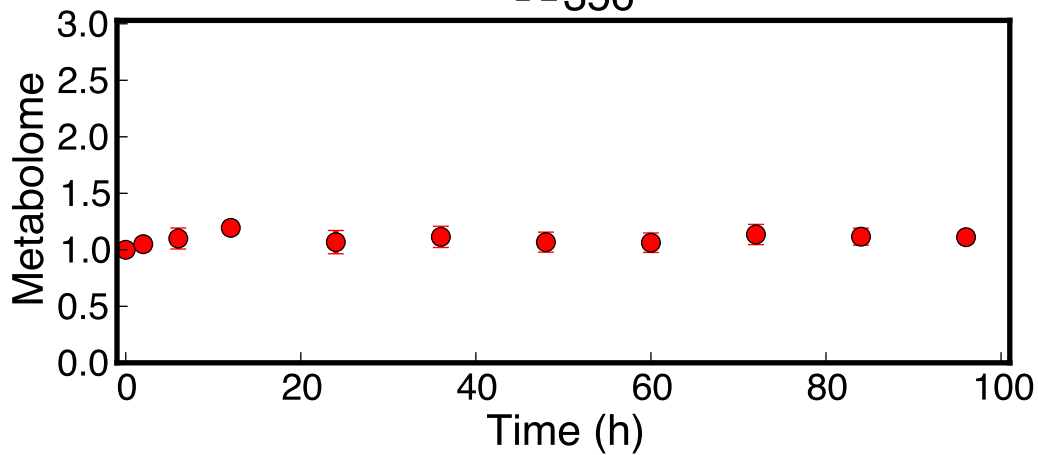

$X_{357}$

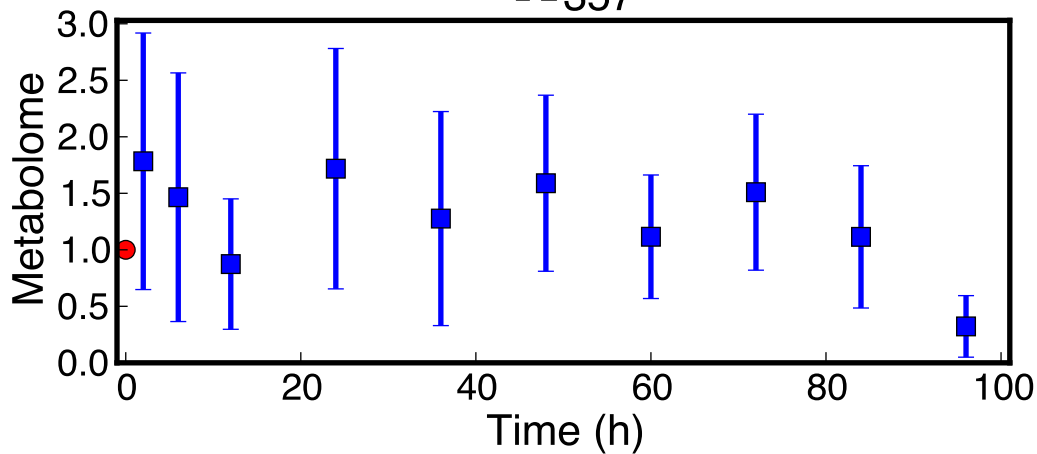

$X_{358}$

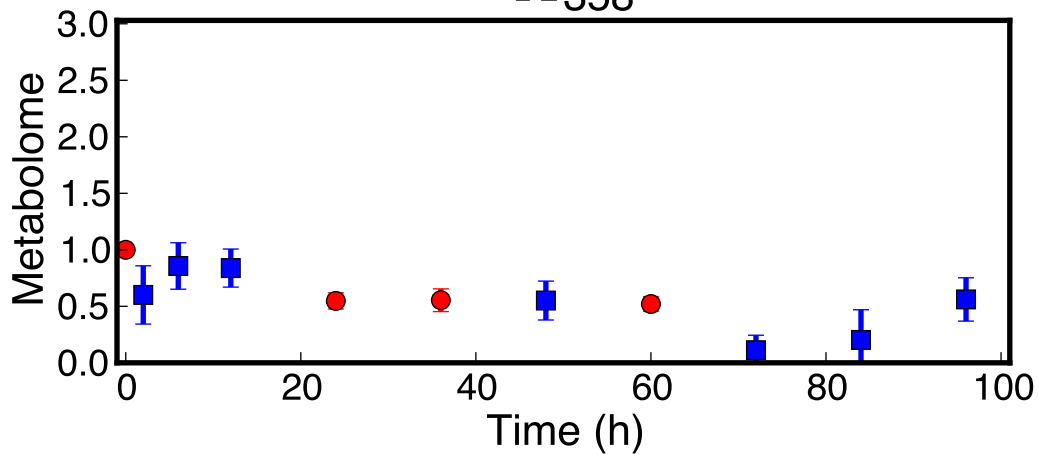

$X_{359}$

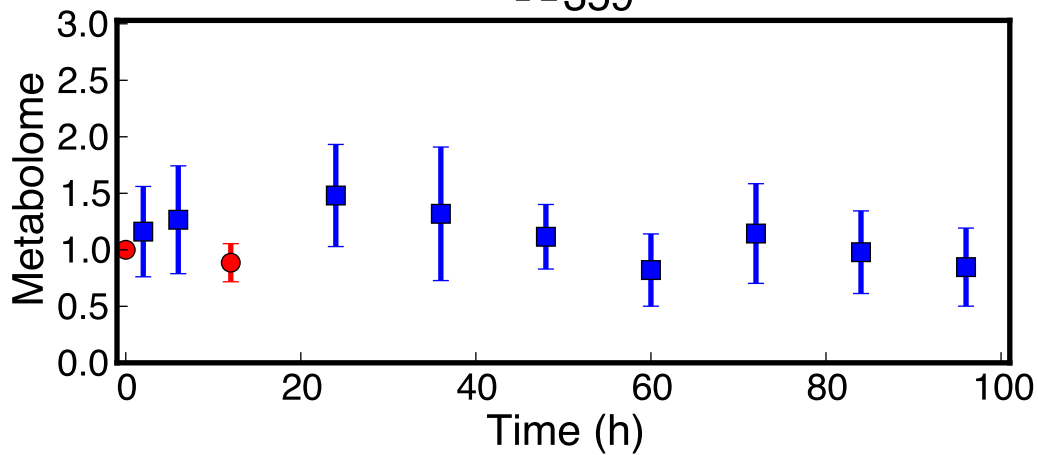

$X_{360}$

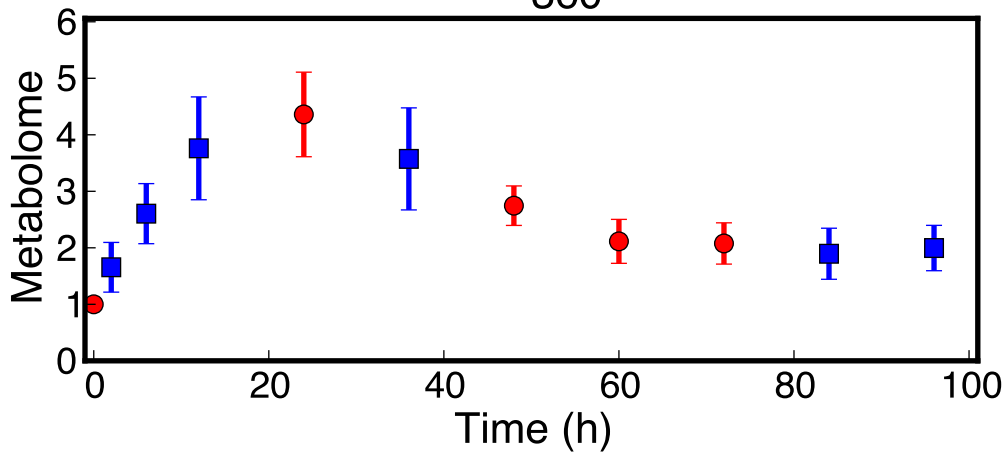



$X_{361}$

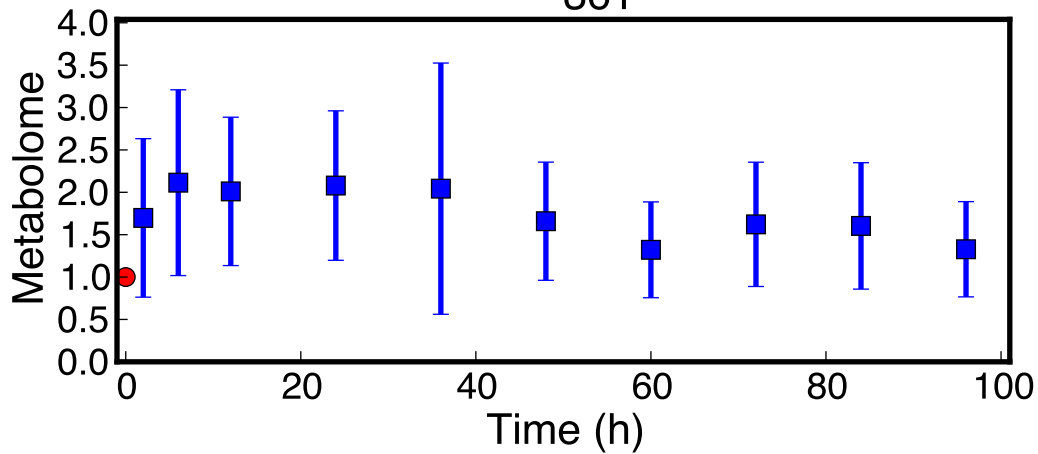

$X_{362}$

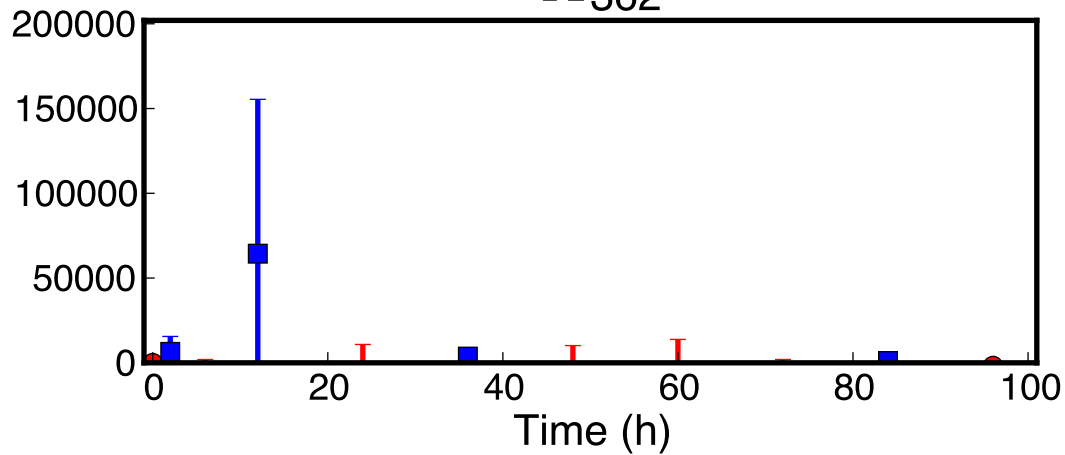

$X_{363}$

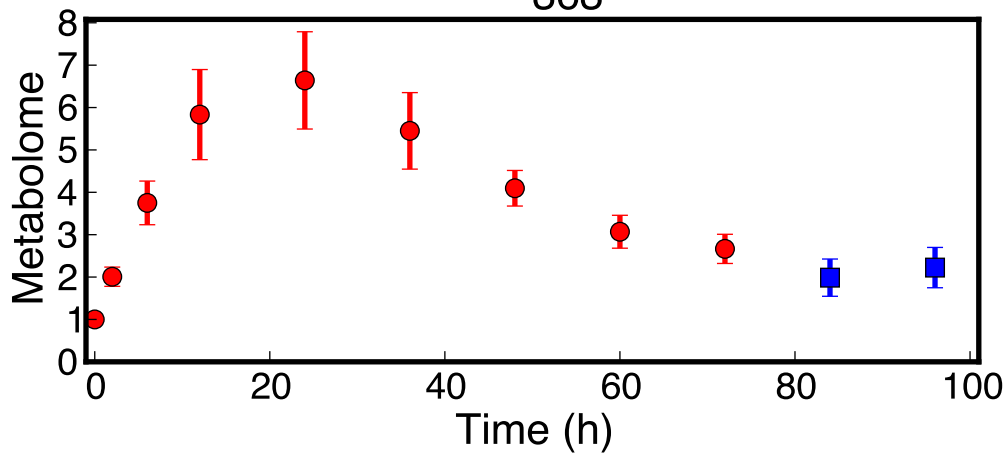

$X_{364}$

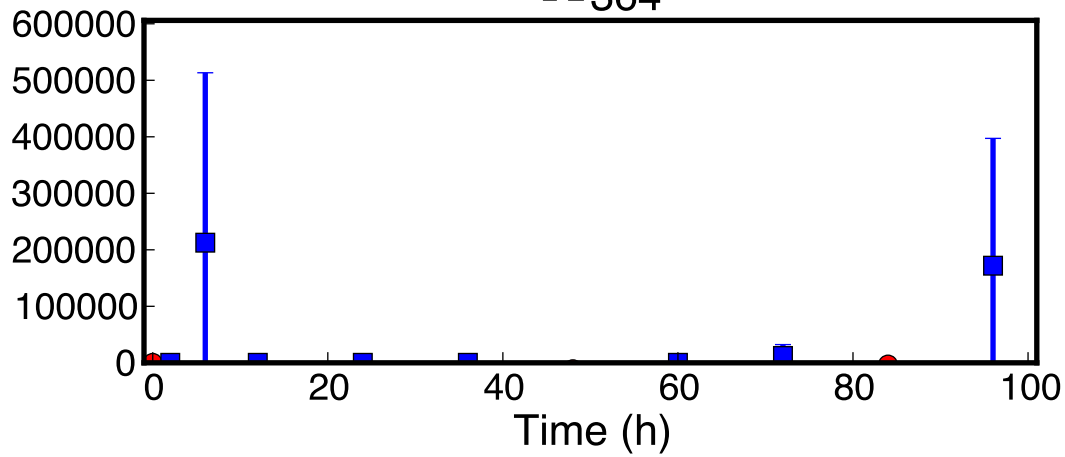

$X_{365}$

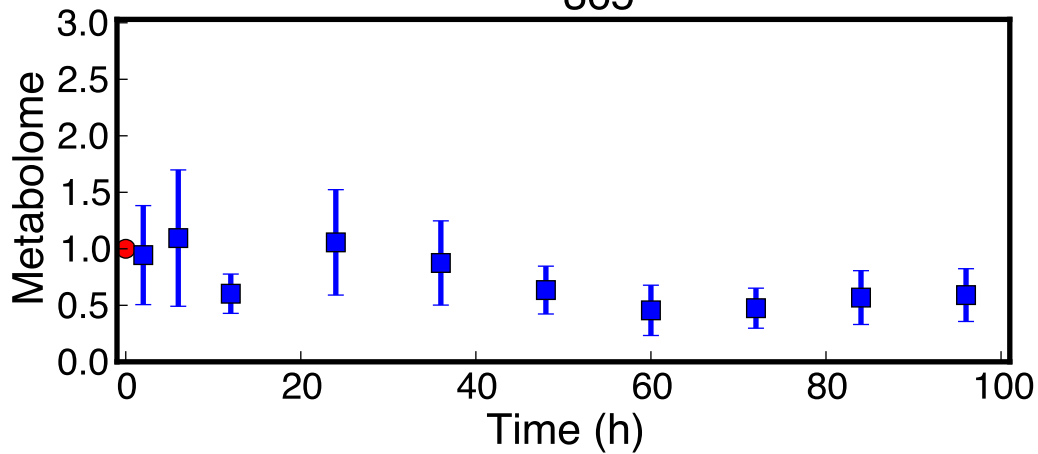

$X_{366}$

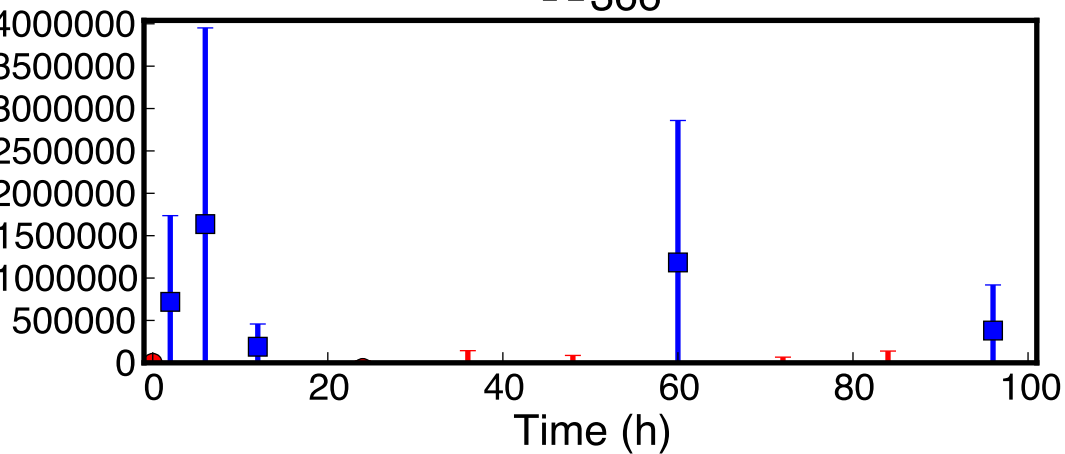

$X_{367}$

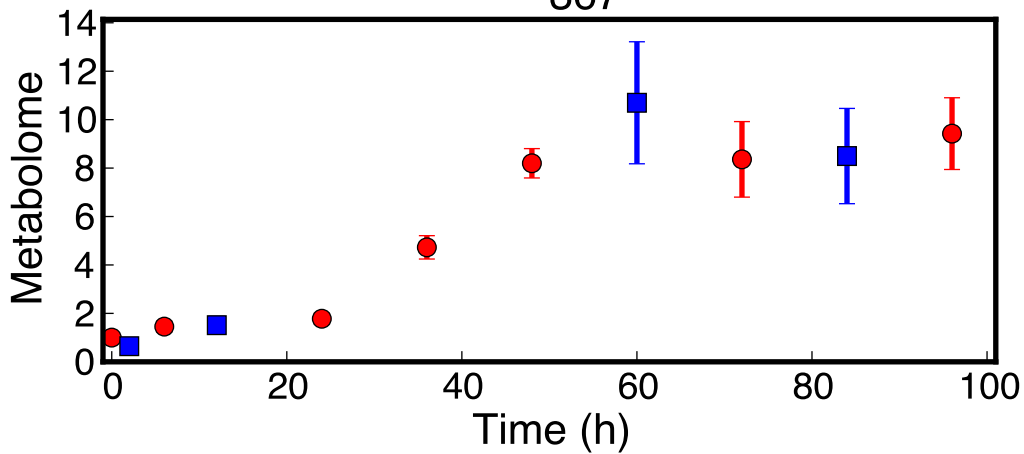

$X_{368}$

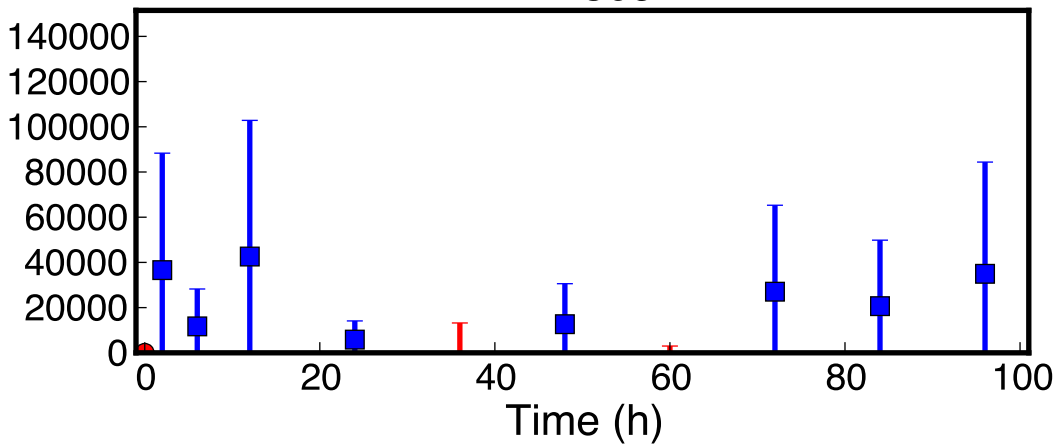



$X_{369}$

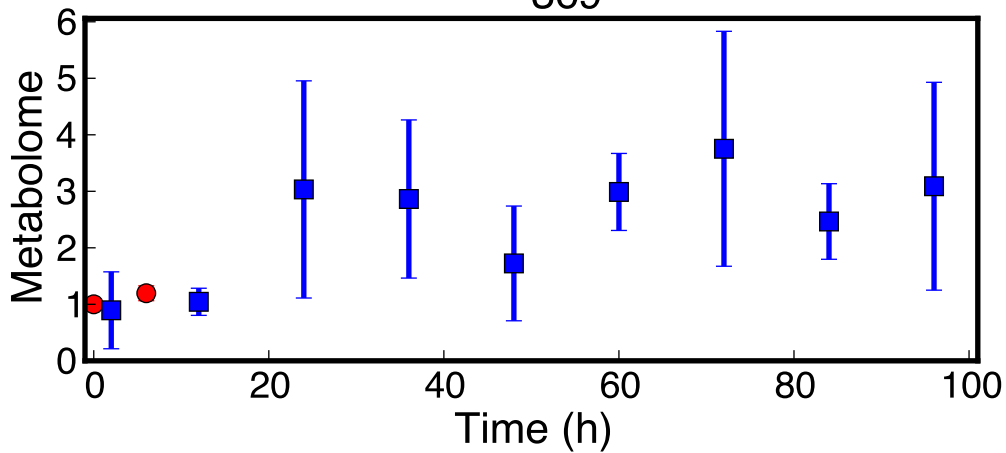

$X_{370}$ 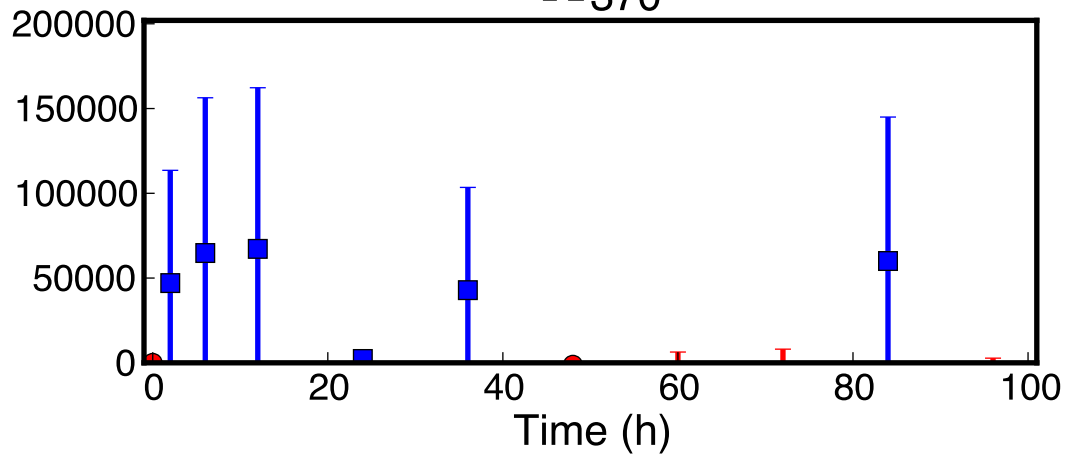

$X_{371}$

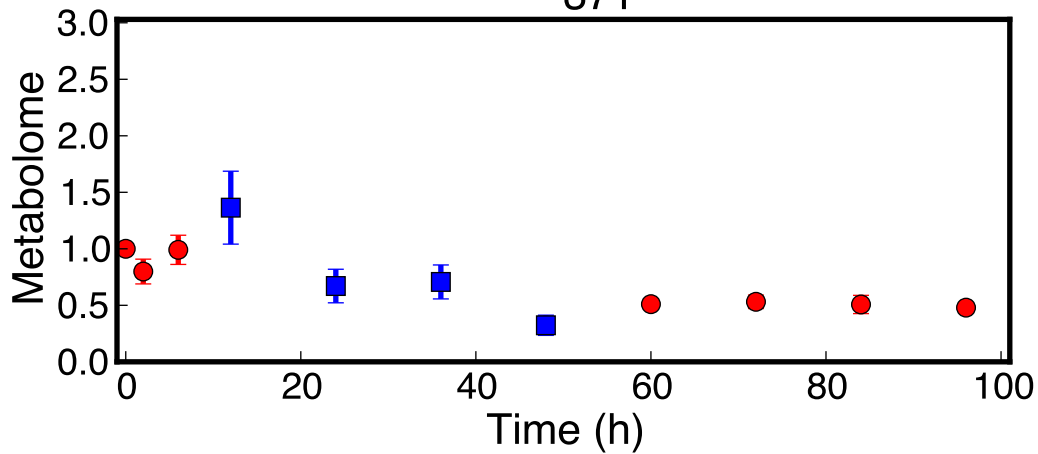

$X_{372}$

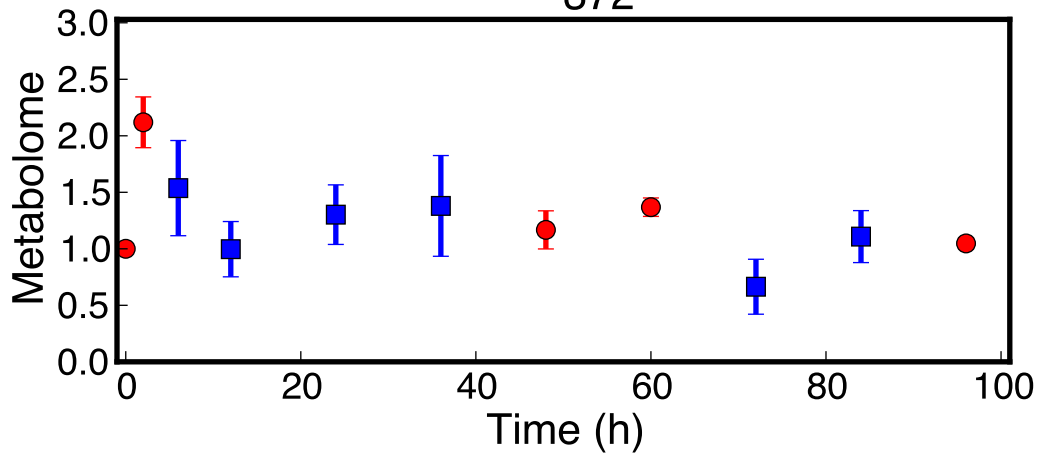

$X_{373}$

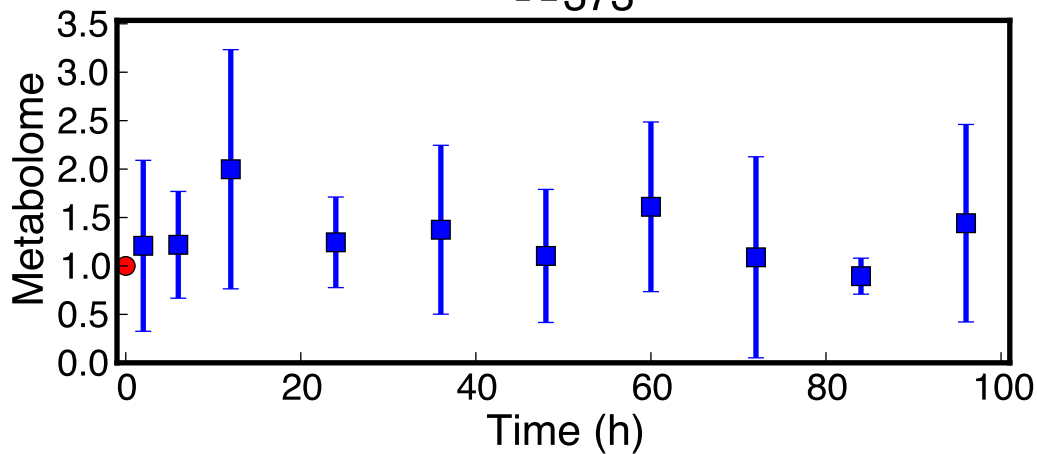

$X_{374}$

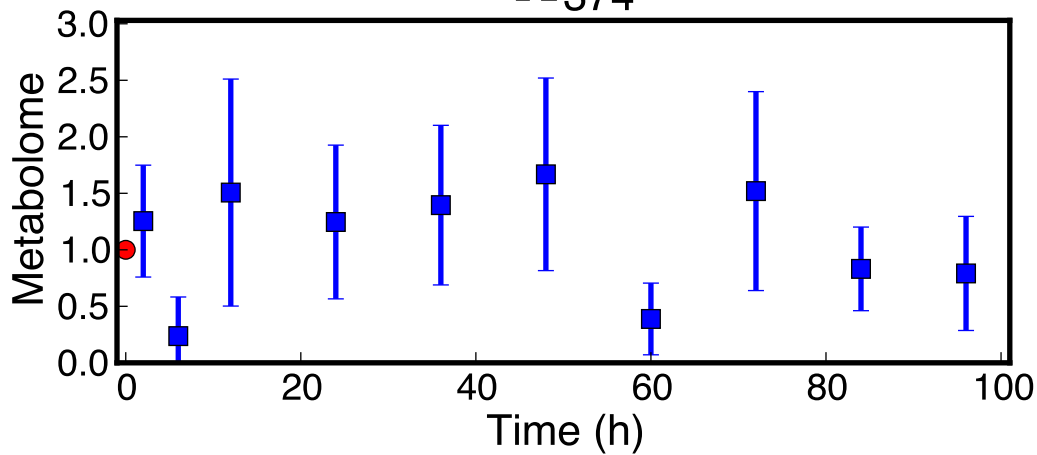

$X_{375}$ 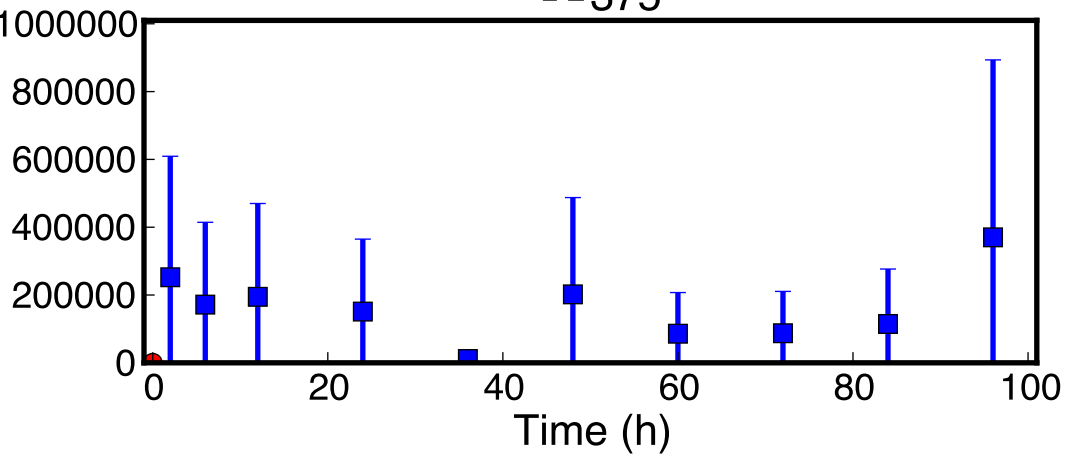

$X_{376}$

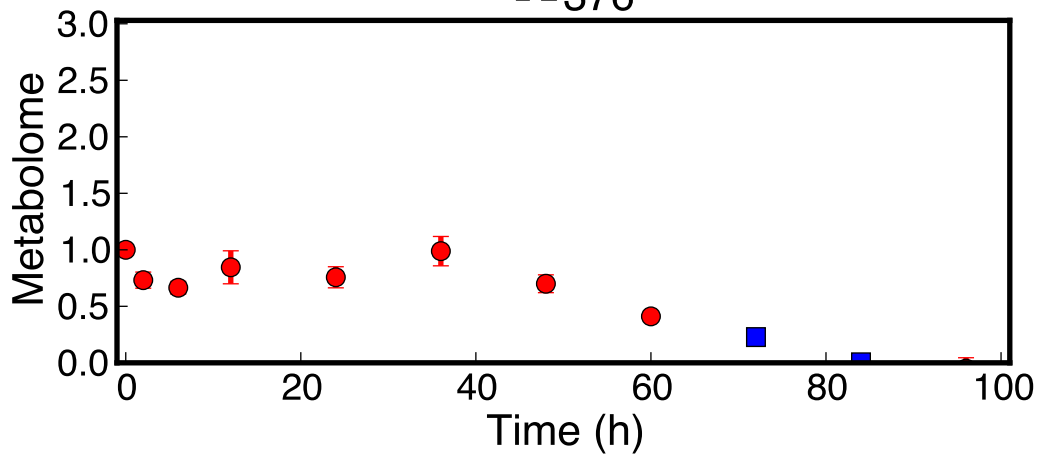



$X_{377}$

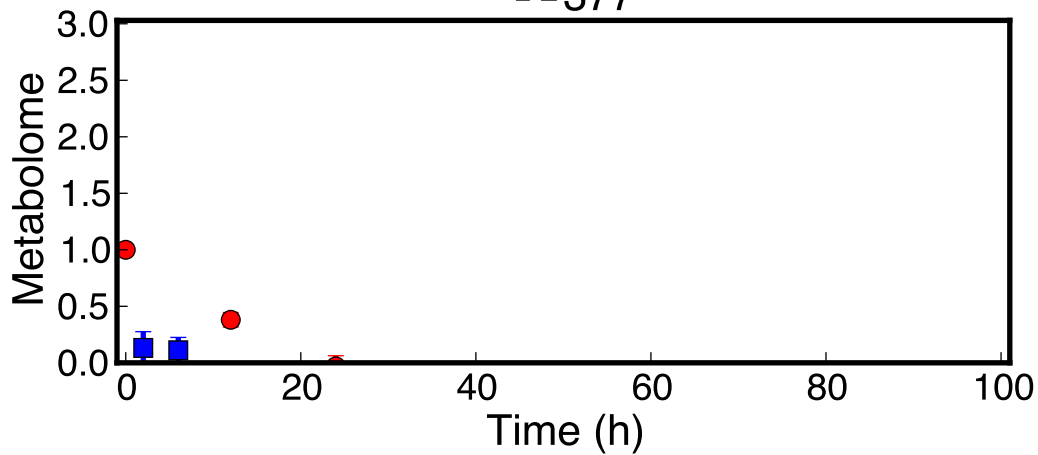

$X_{378}$

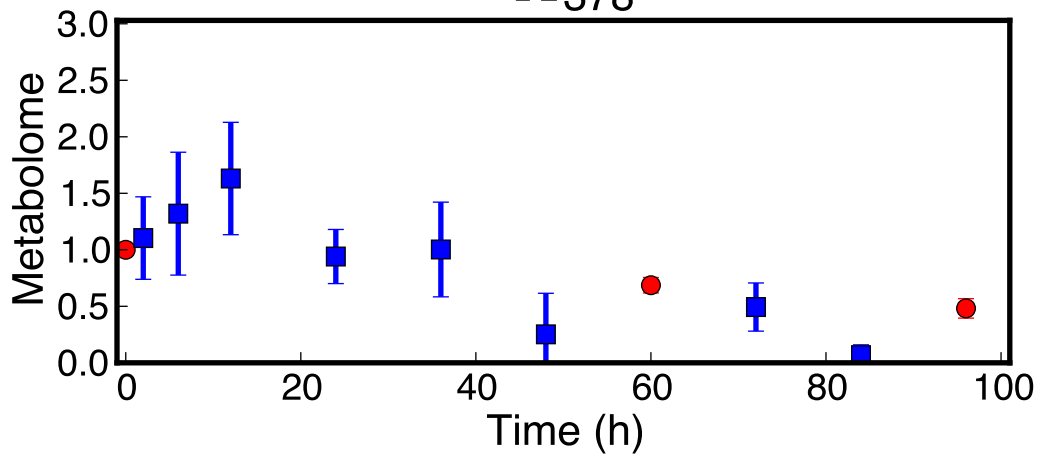

$X_{379}$

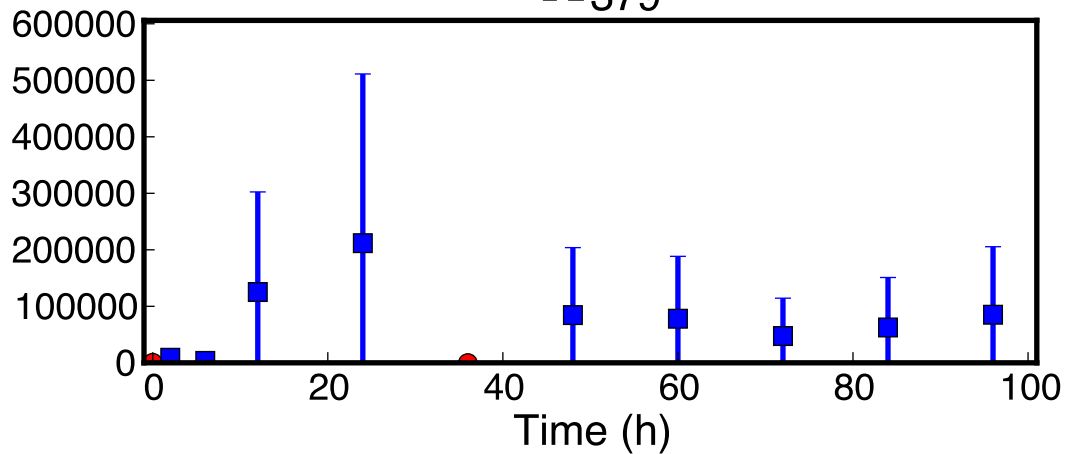

$X_{380}$

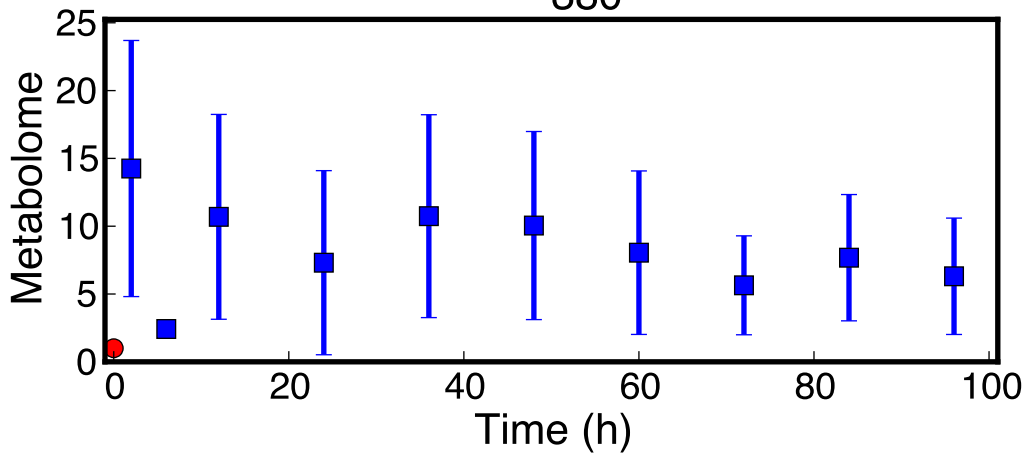

$X_{381}$

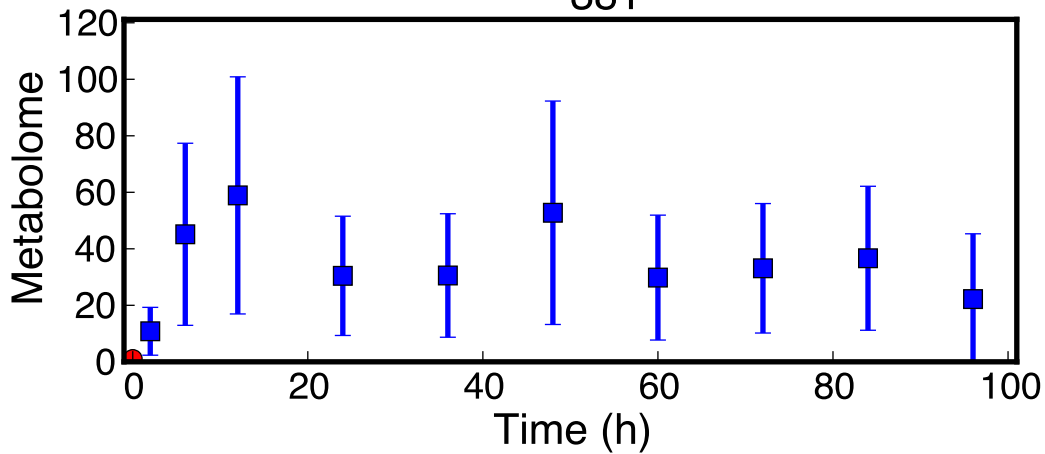

$X_{382}$

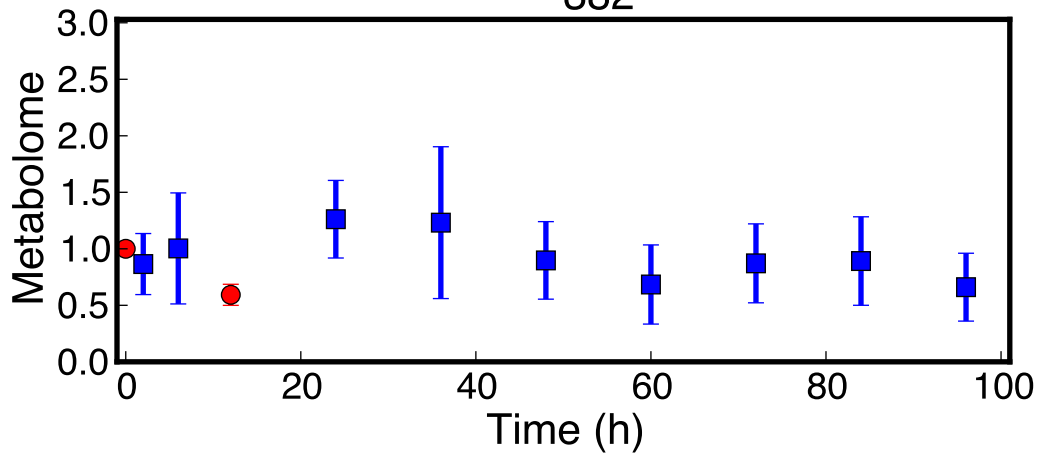

$X_{383}$

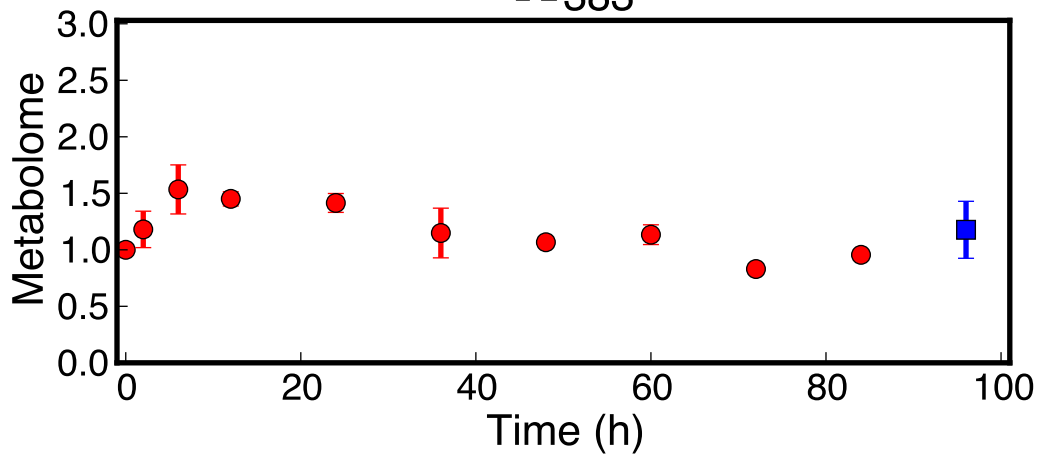

$X_{384}$

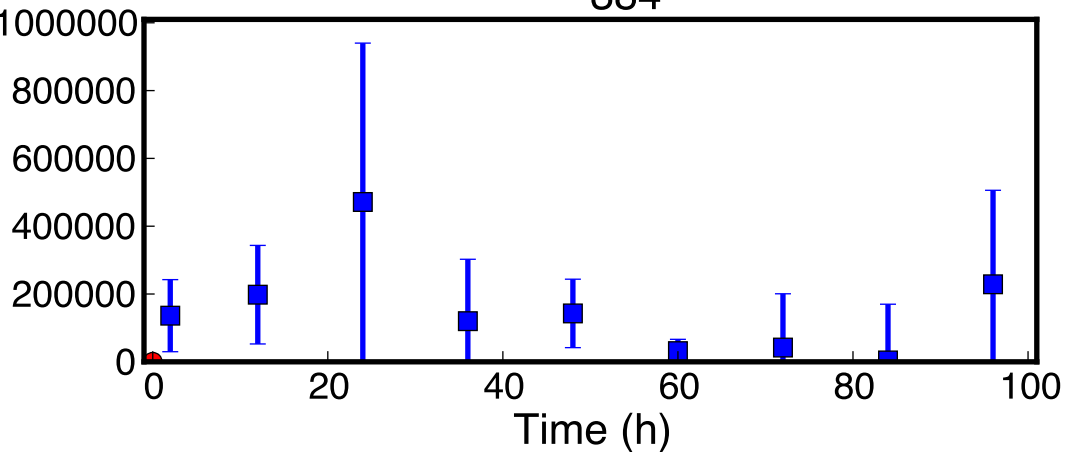



$X_{385}$

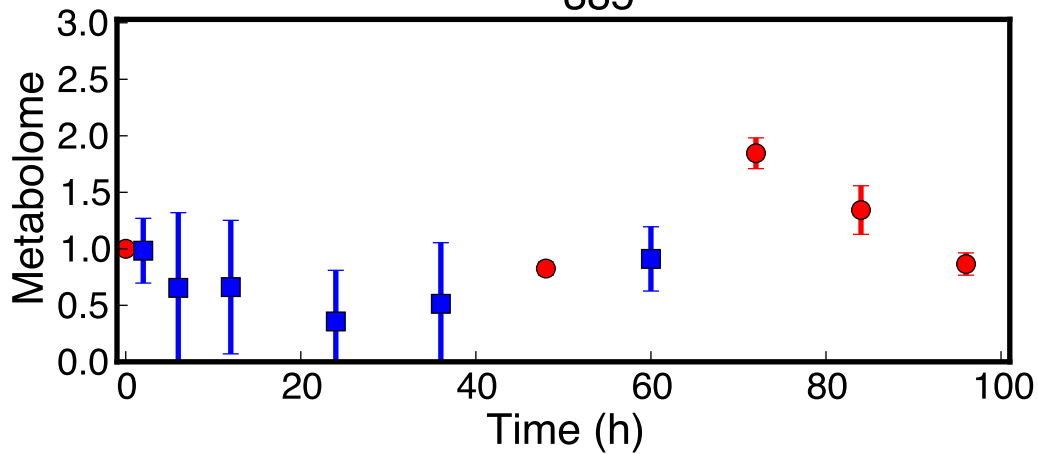

$X_{386}$

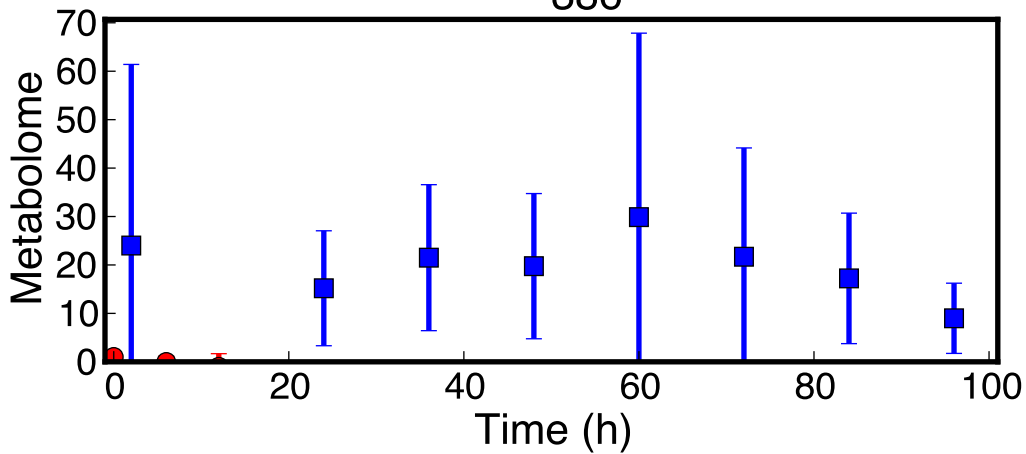

$X_{387}$

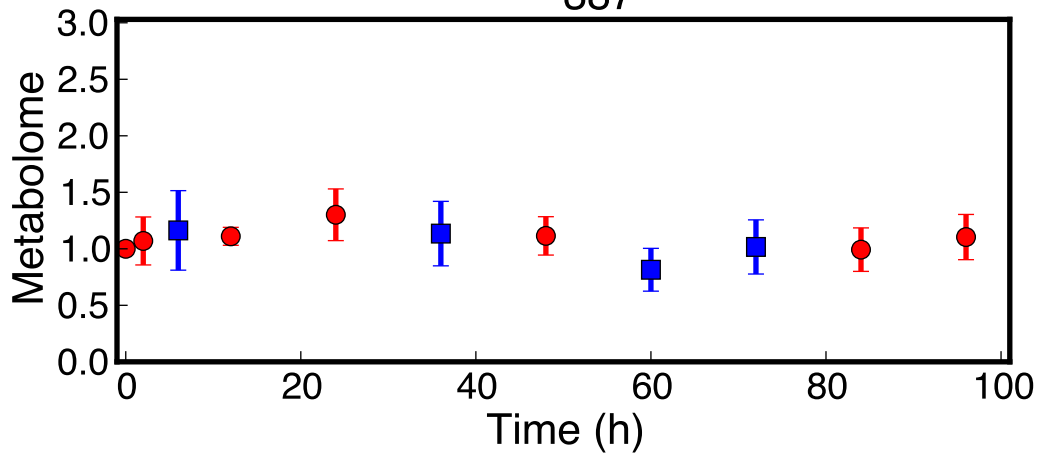

$X_{388}$

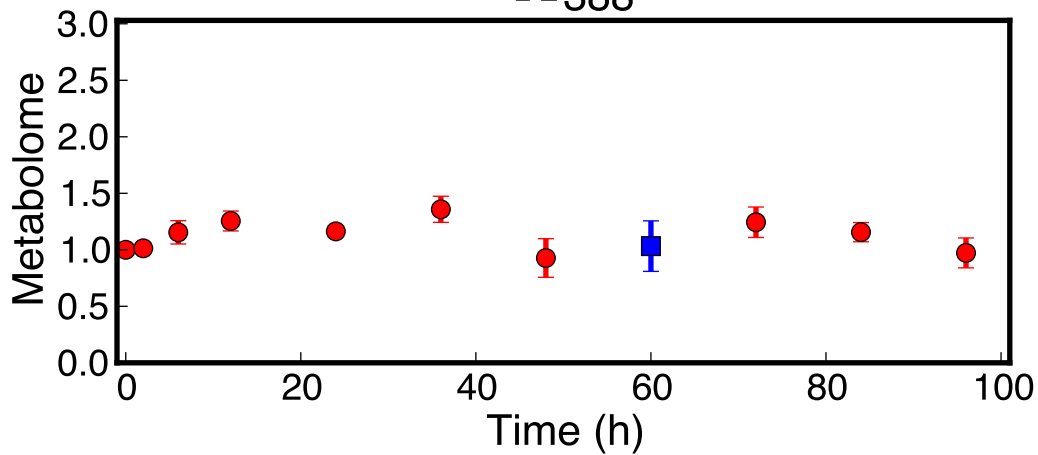

$X_{389}$

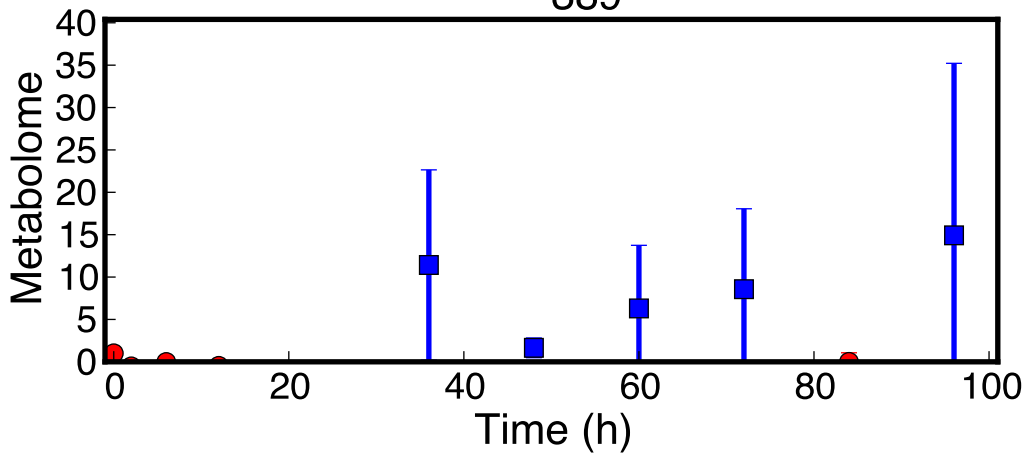

$X_{390}$

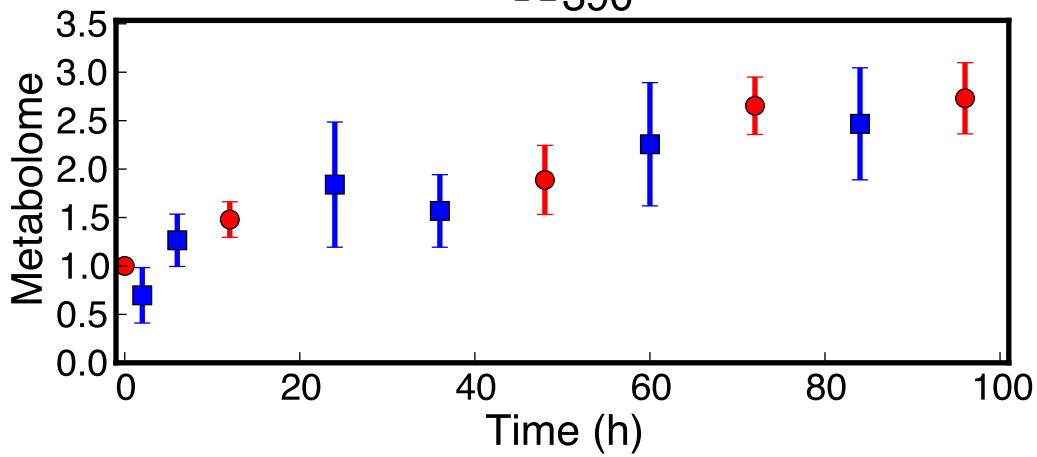

$X_{391}$

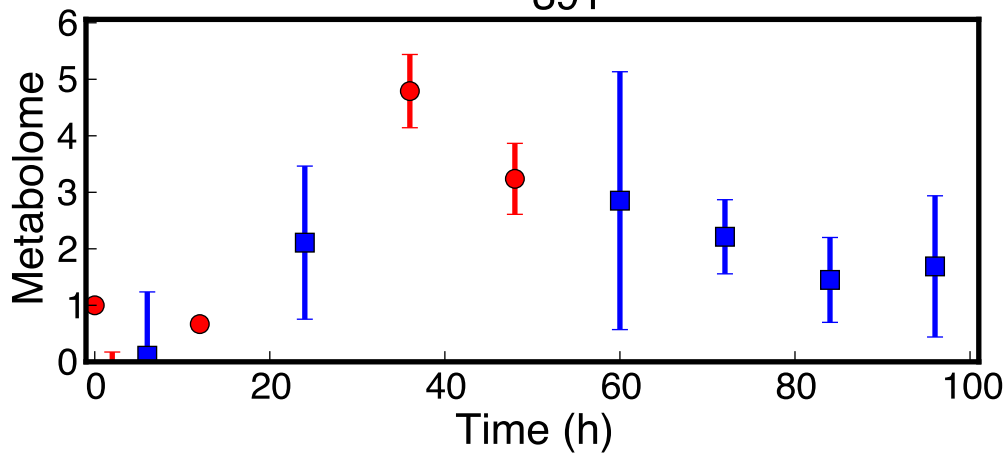

$X_{392}$

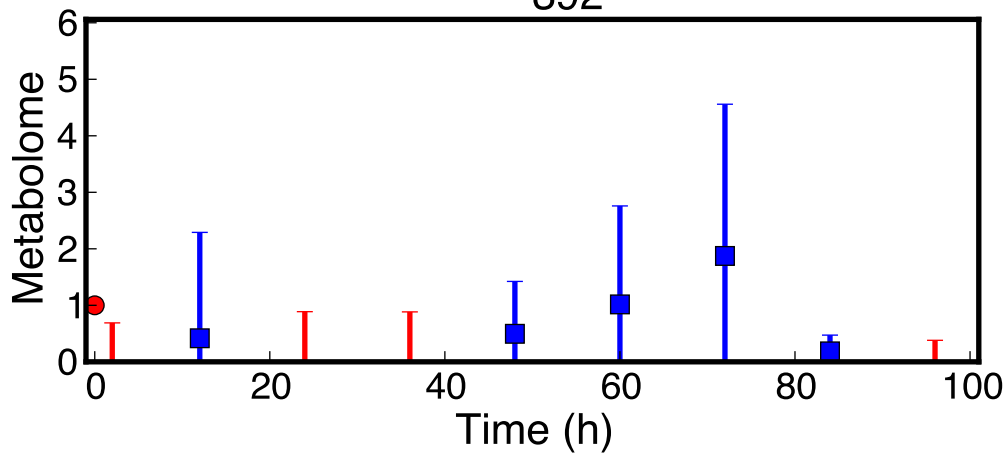



$X_{393}$

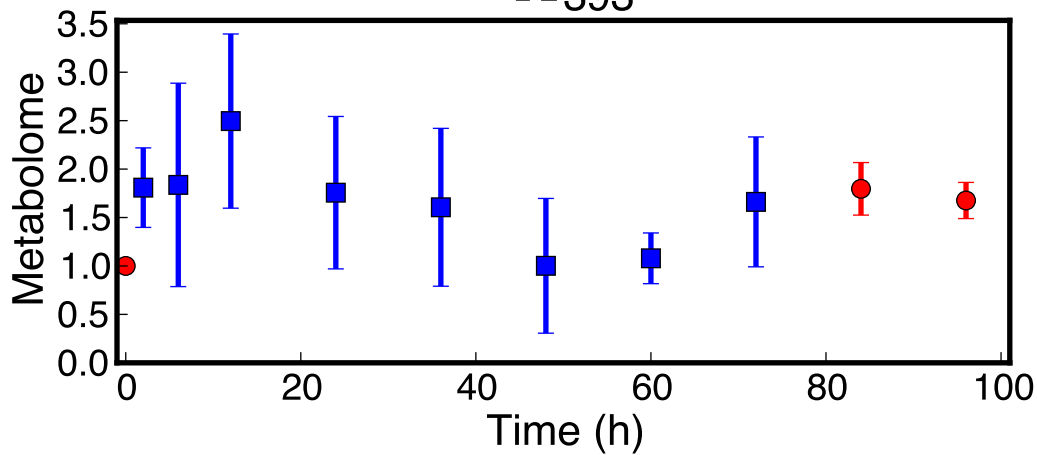

$X_{394}$

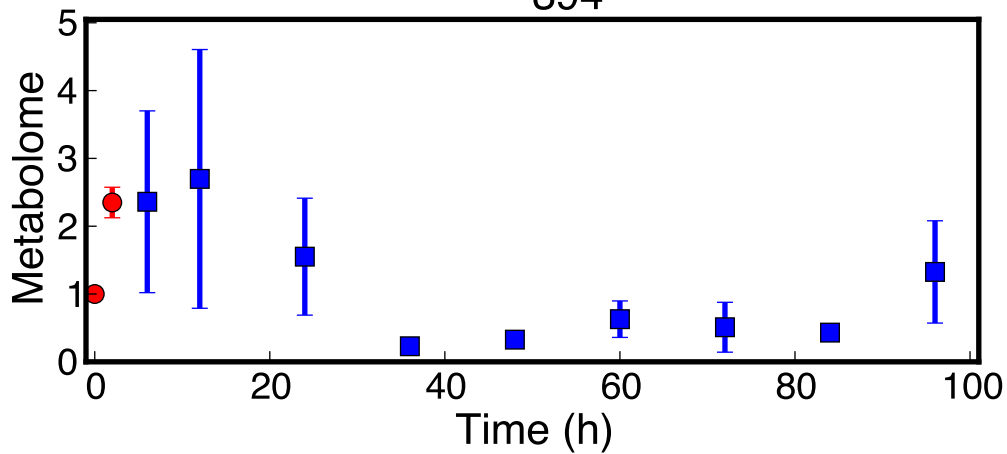

$X_{395}$

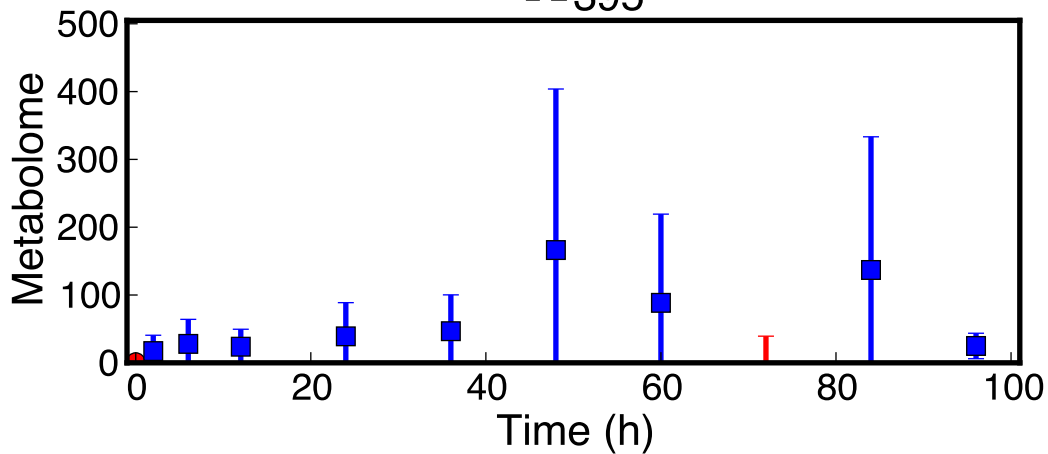

$X_{396}$

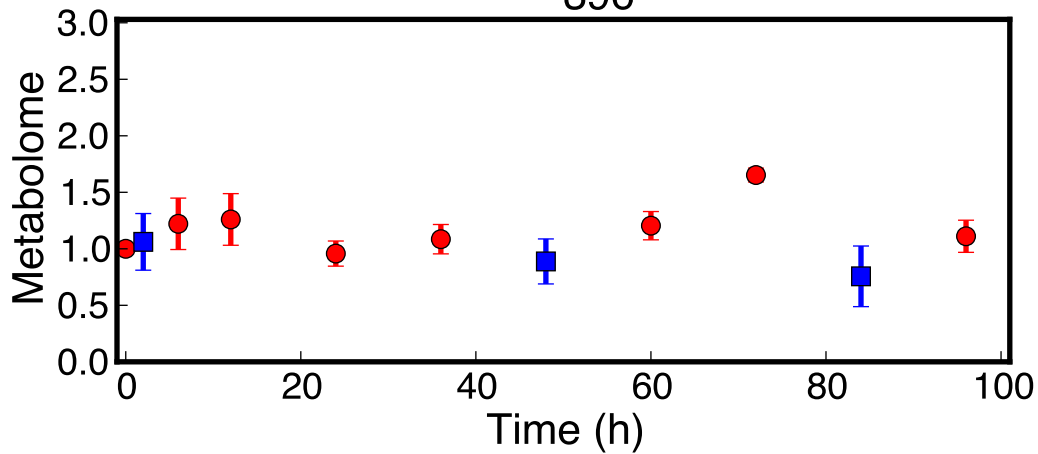

$X_{397}$

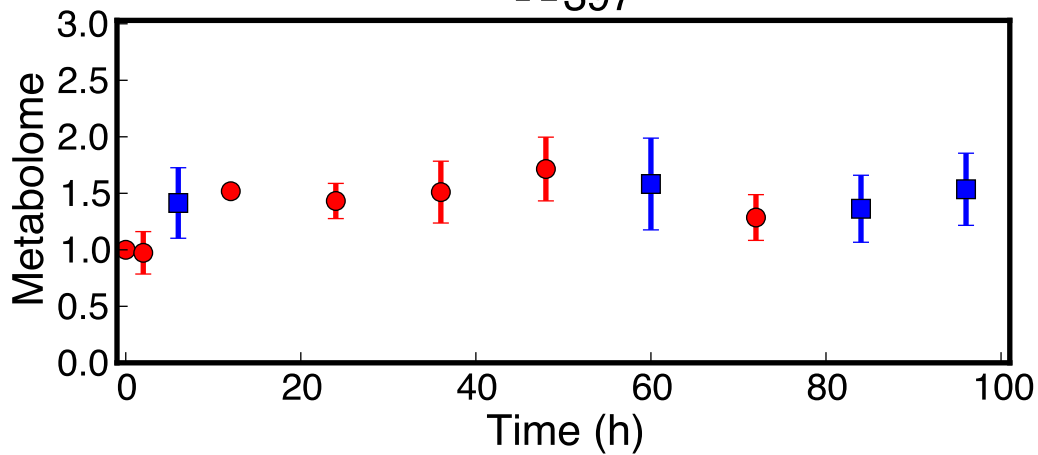

$X_{398}$

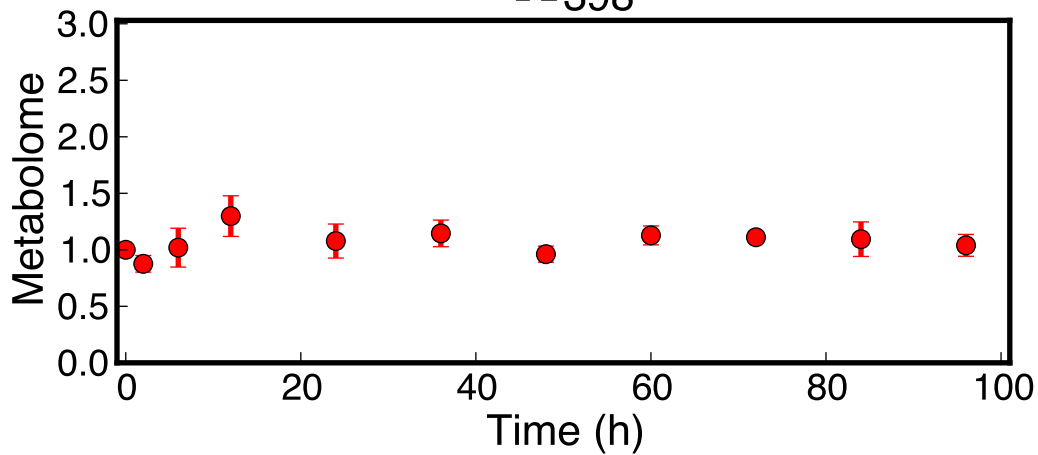

$X_{399}$

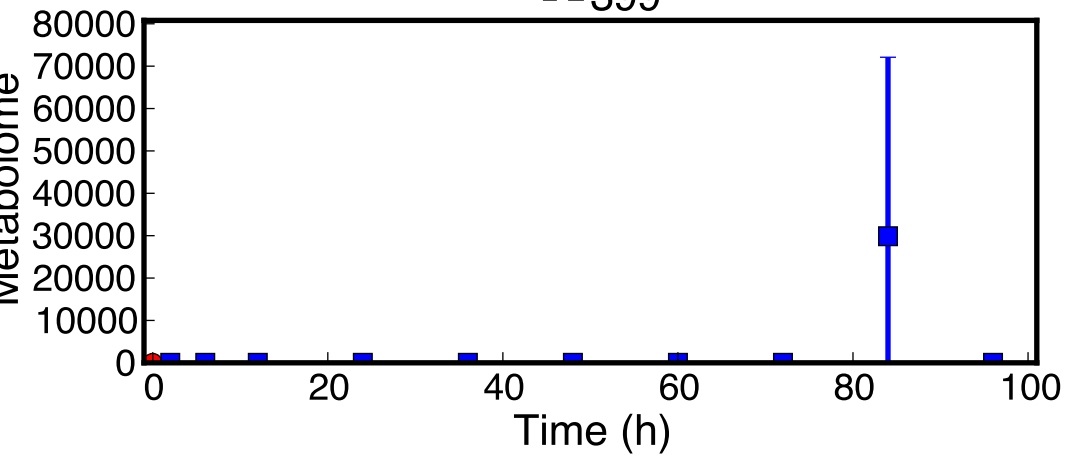

$X_{400}$

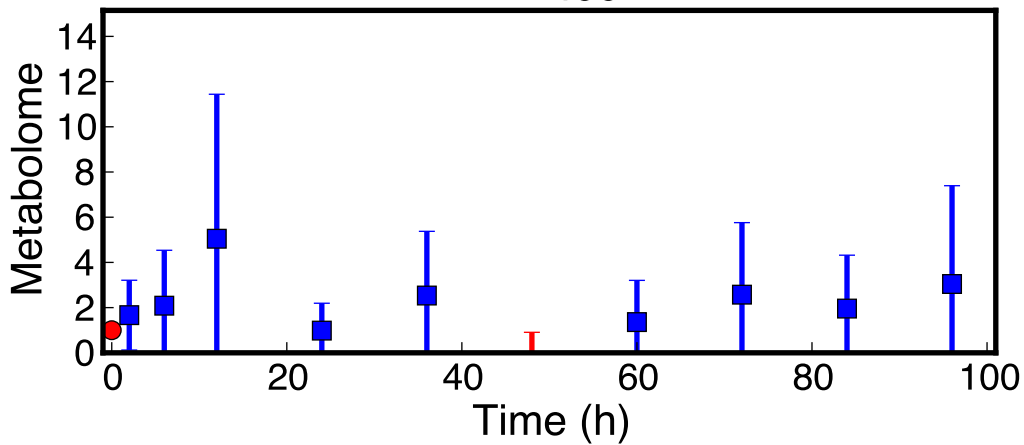



$X_{401}$

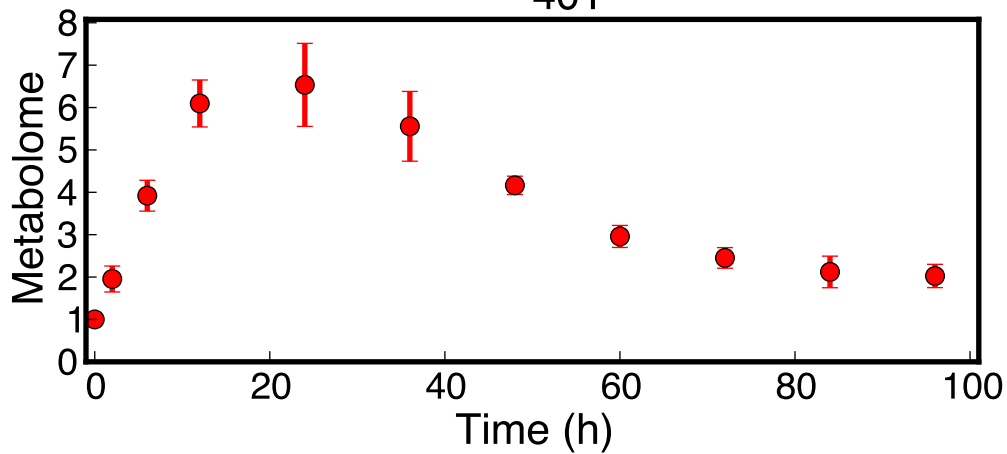

$X_{402}$

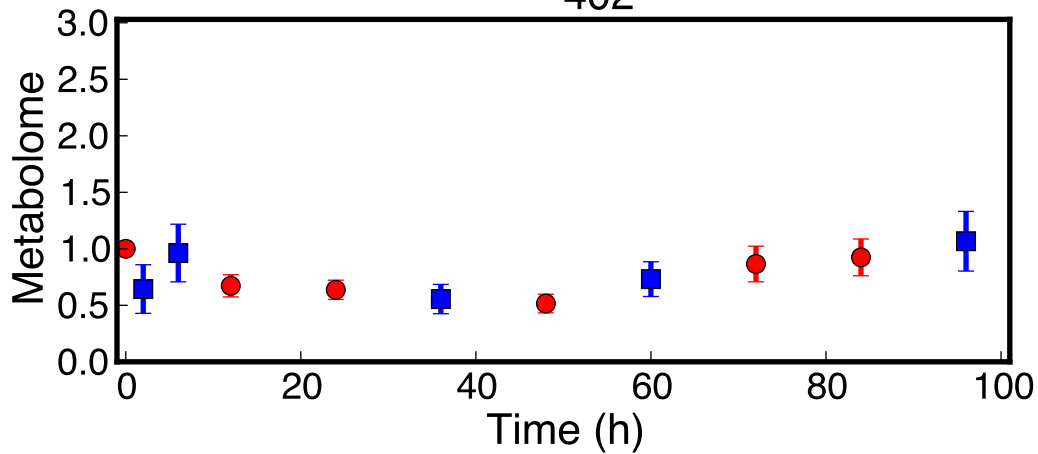

$X_{403}$

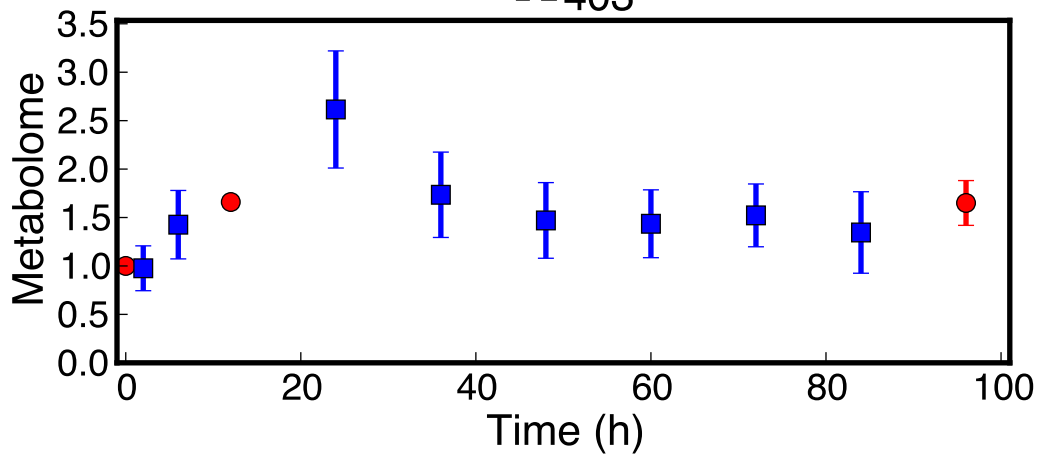

$X_{404}$

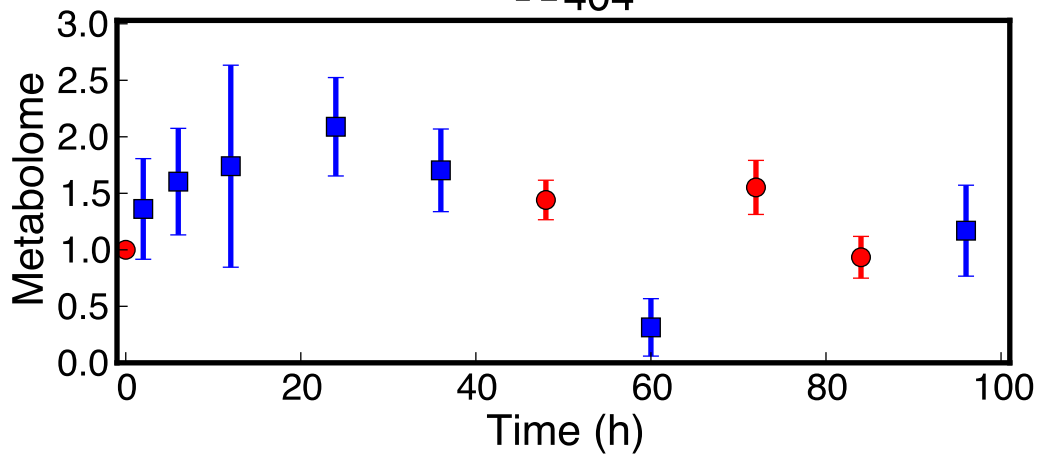

$X_{405}$

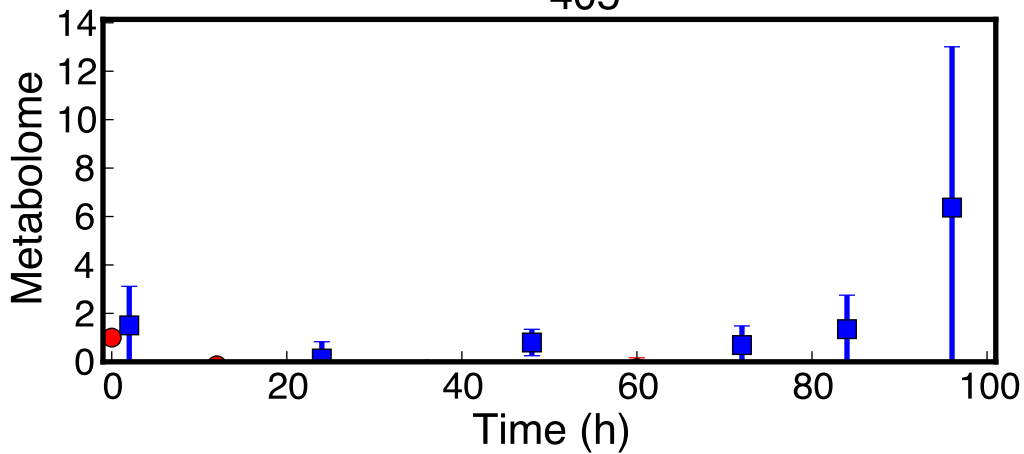

$X_{406}$

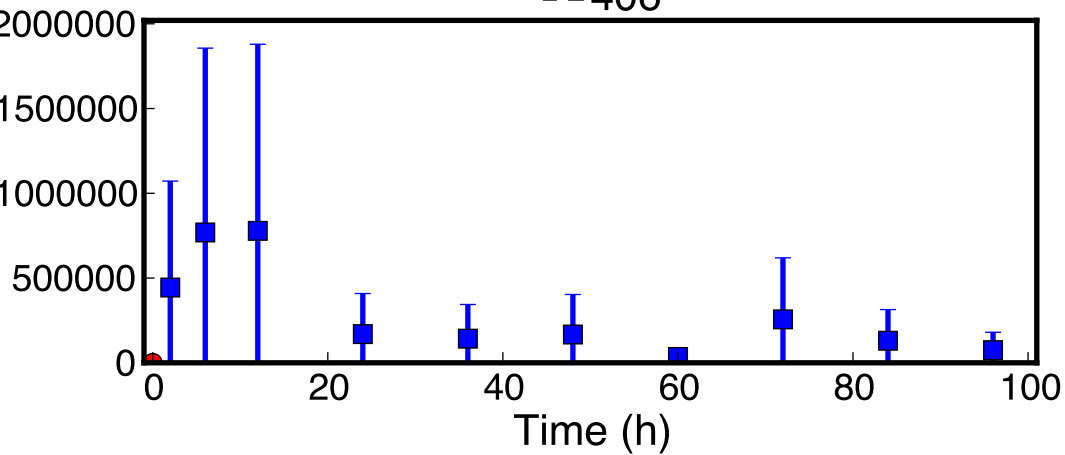

$X_{407}$

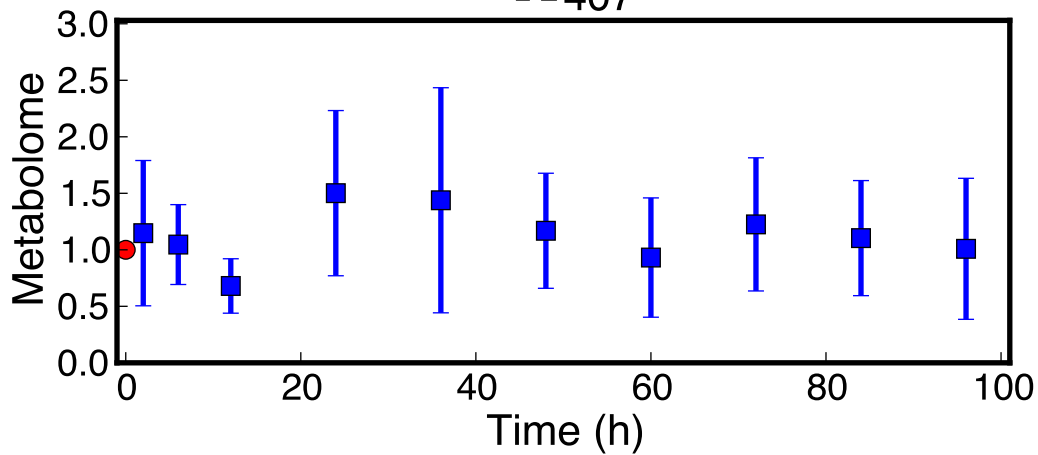

$X_{408}$

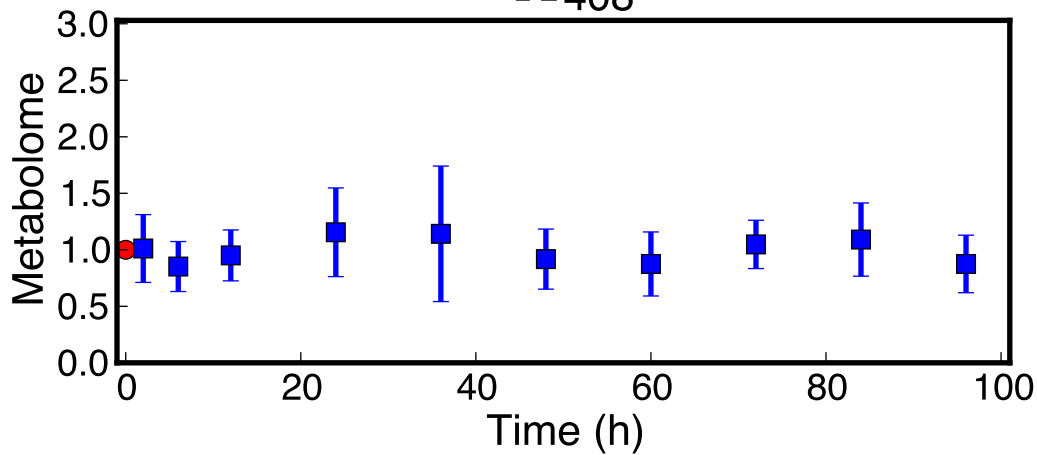



$X_{409}$

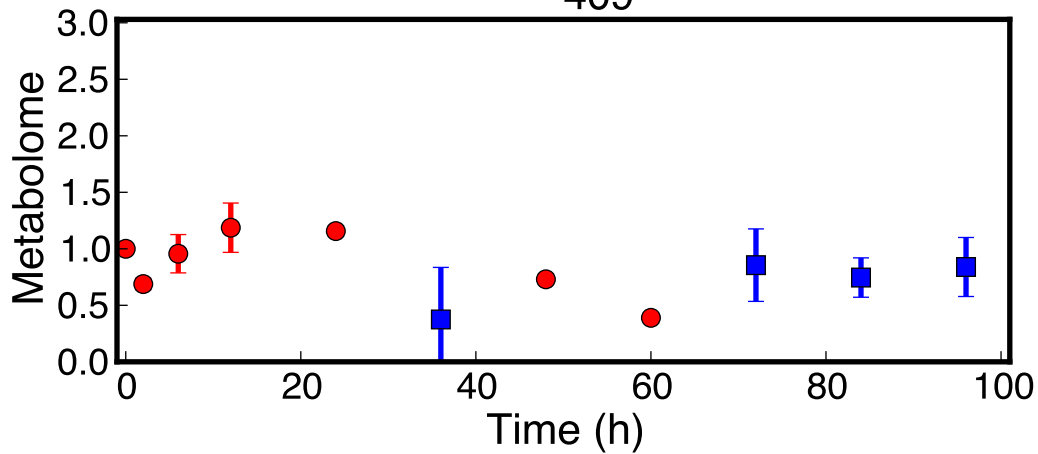

$X_{410}$

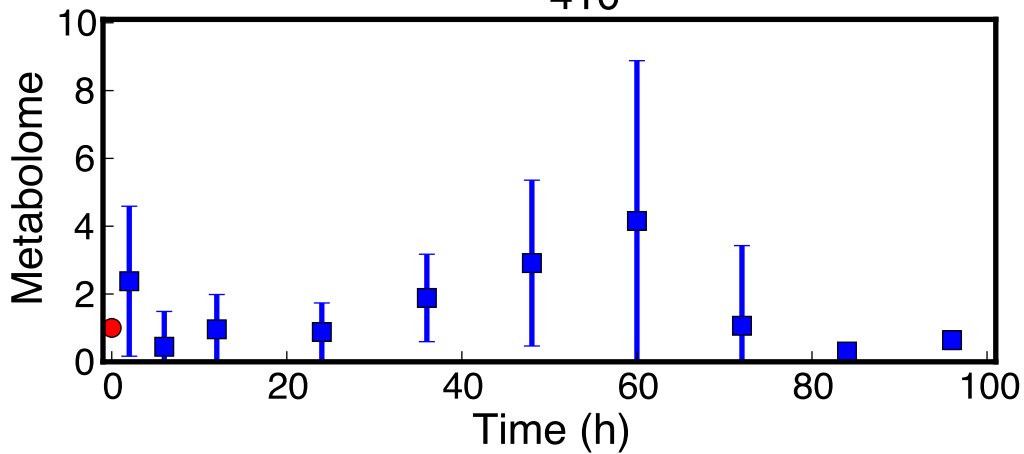

$X_{411}$

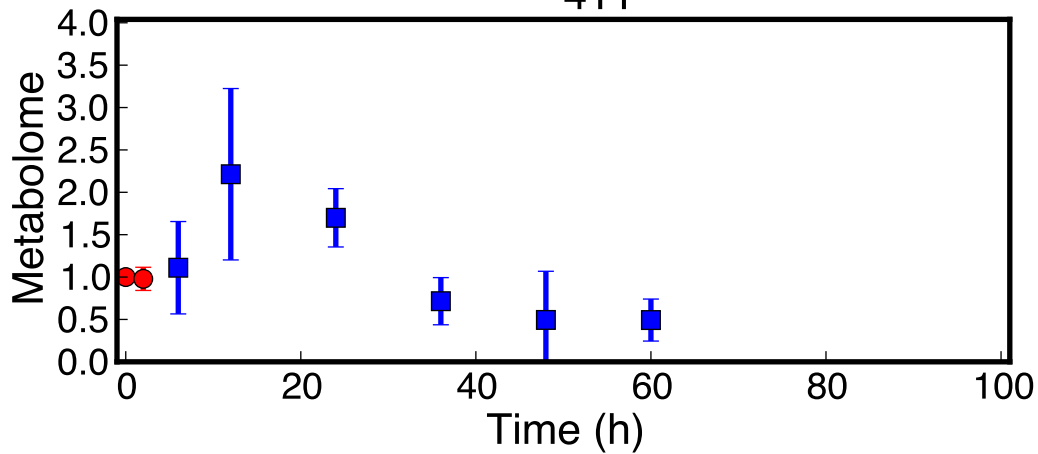

$X_{412}$

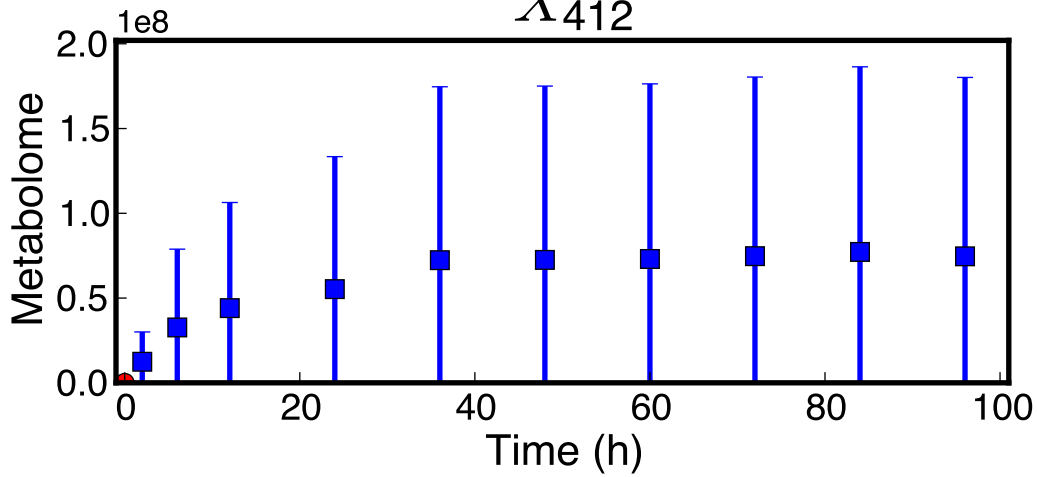

$X_{413}$

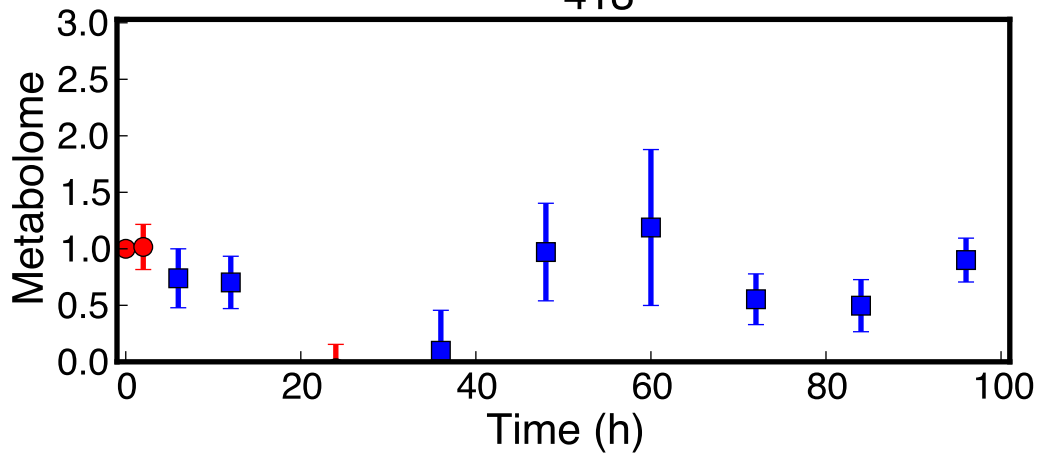

$X_{414}$

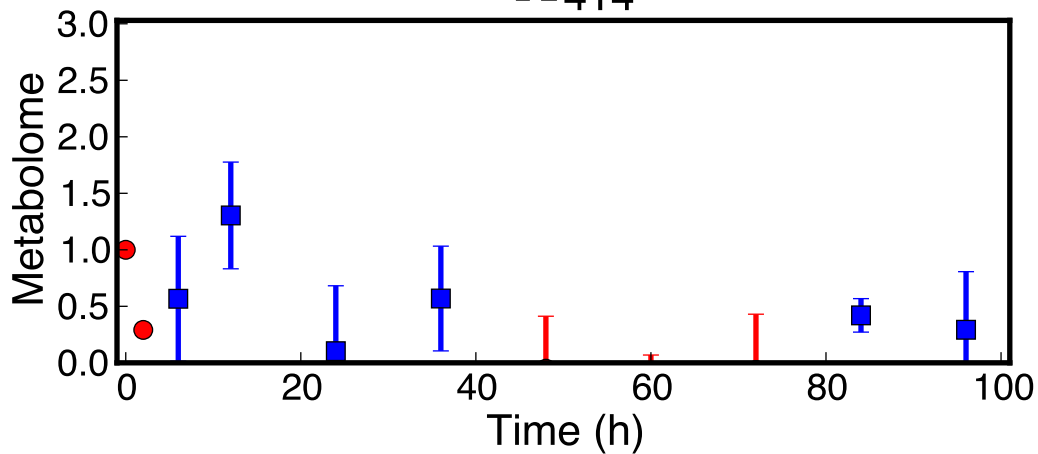

$X_{415}$

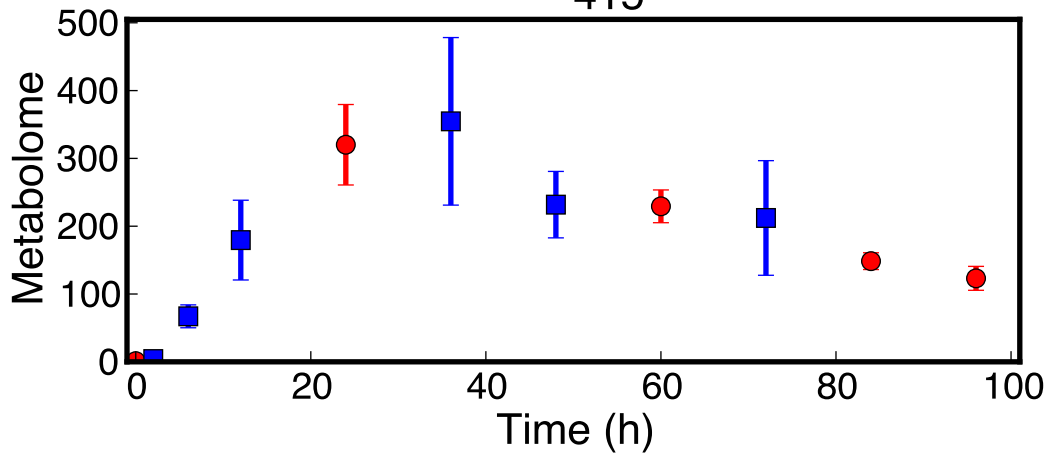

$X_{416}$

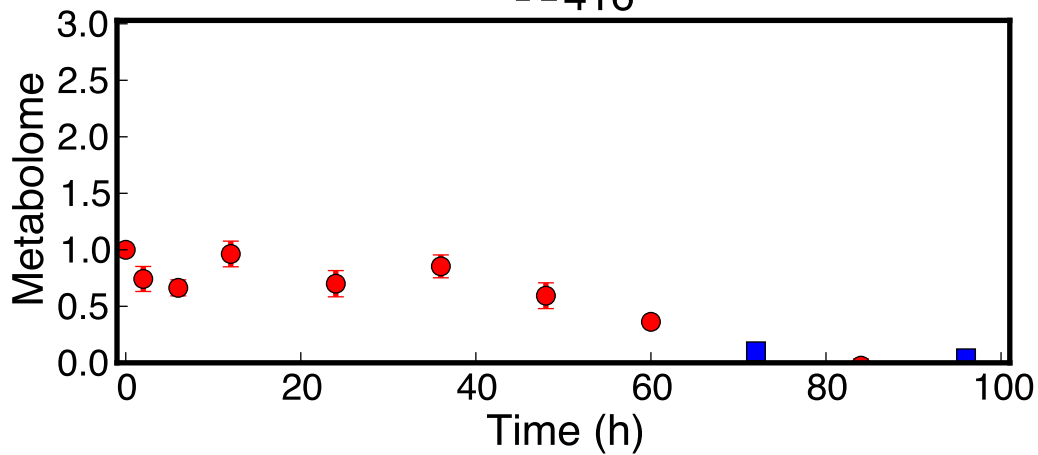



$X_{417}$

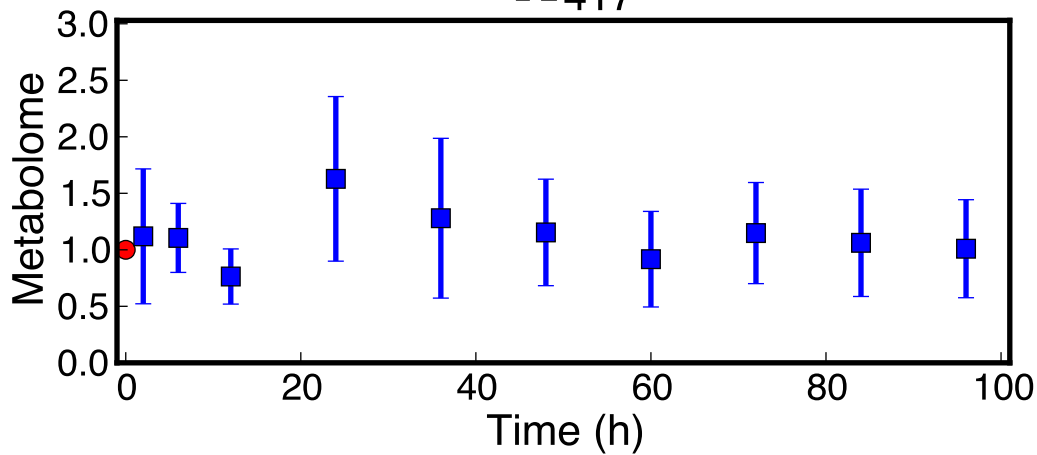

$X_{418}$

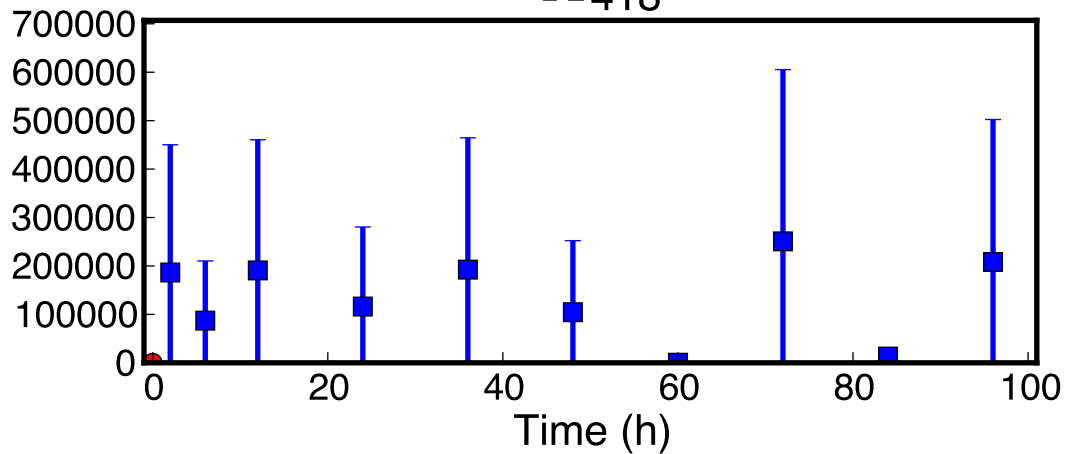

$X_{419}$

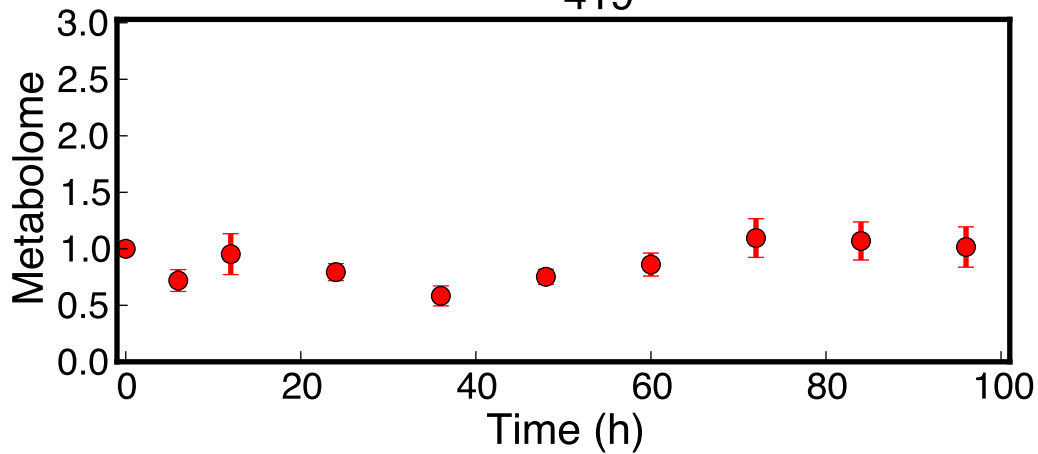

$X_{420}$

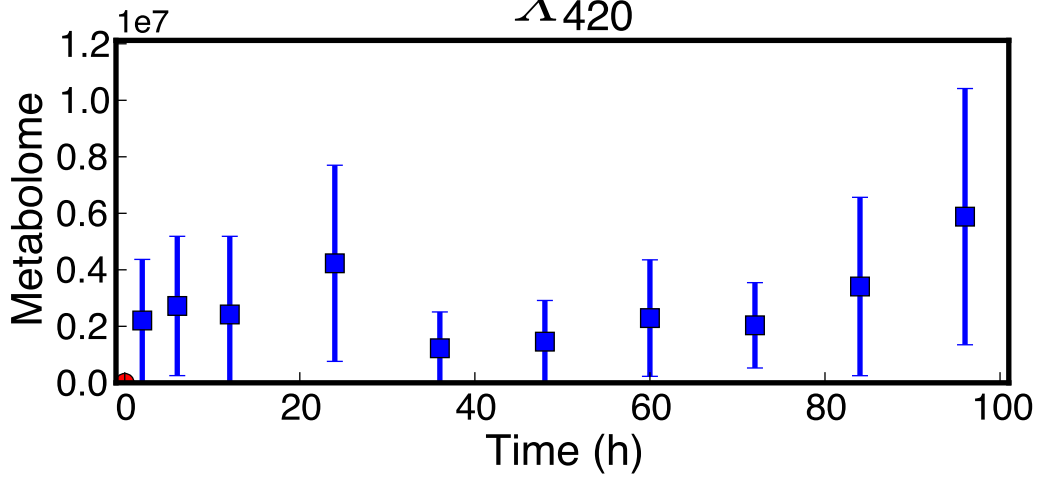

$X_{421}$ 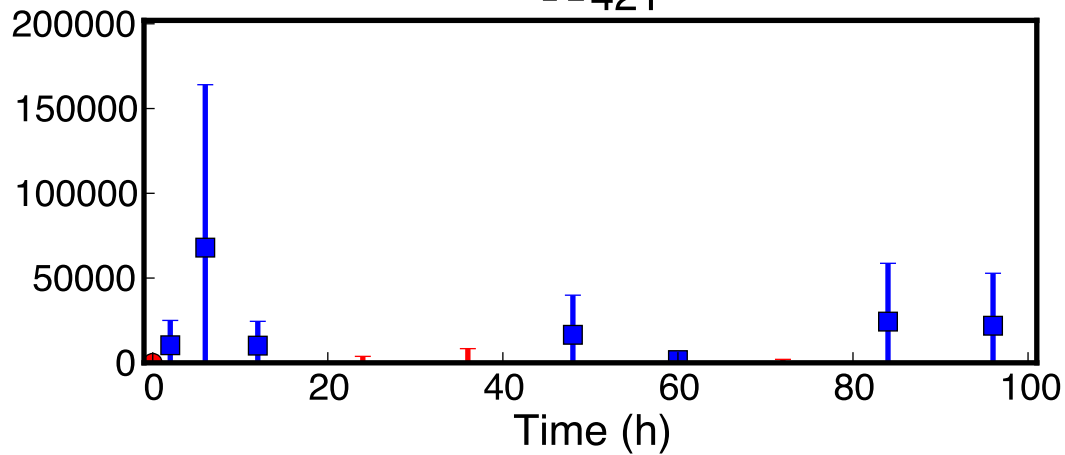

$X_{422}$

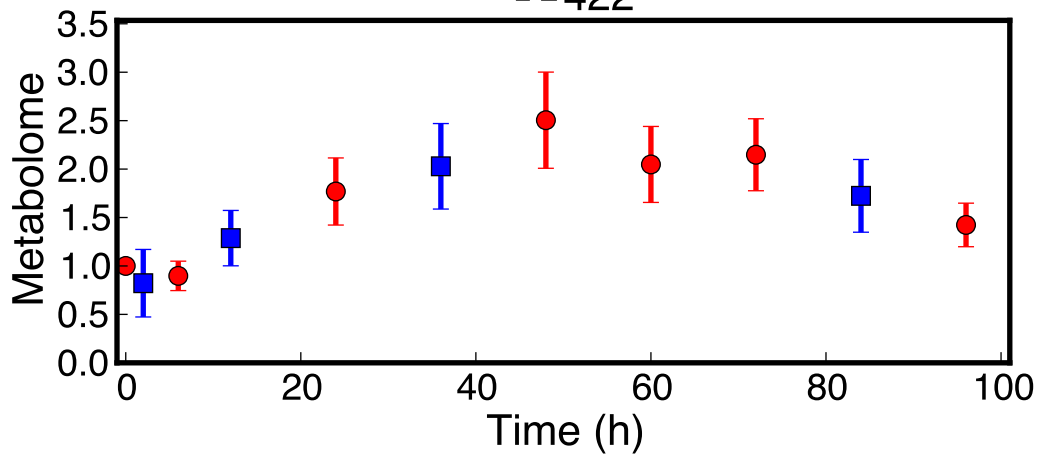

$X_{423}$

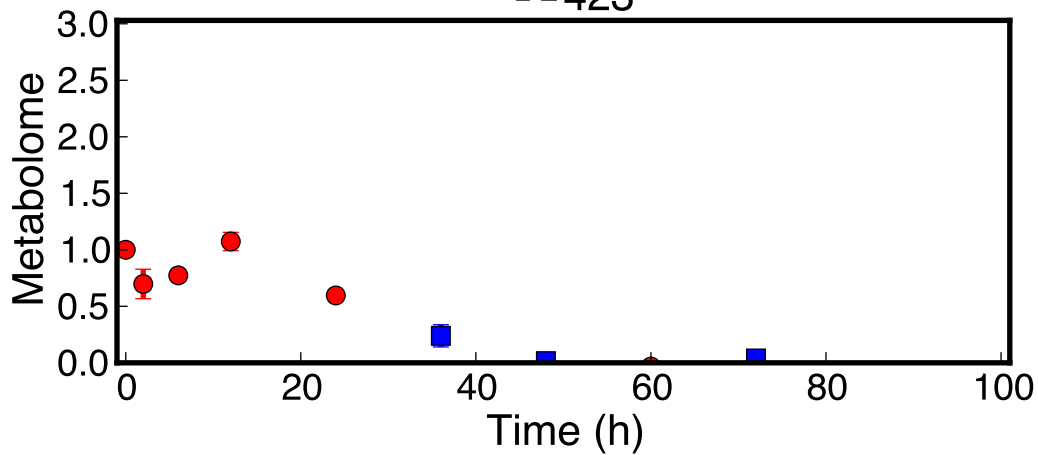

$X_{424}$

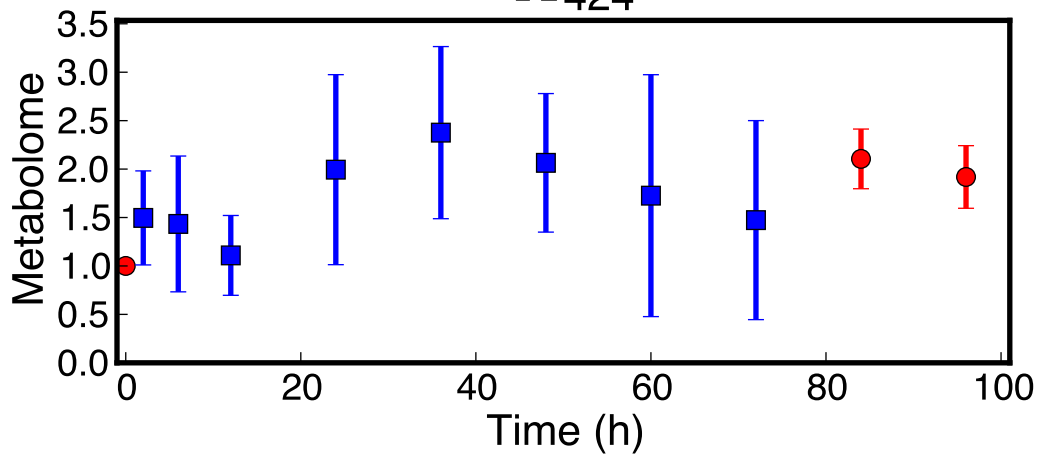



$X_{425}$

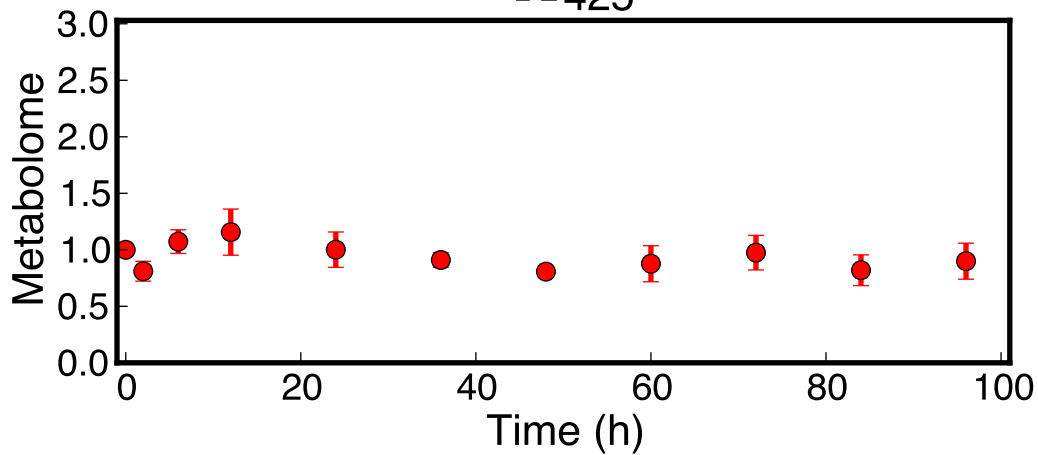

$X_{426}$

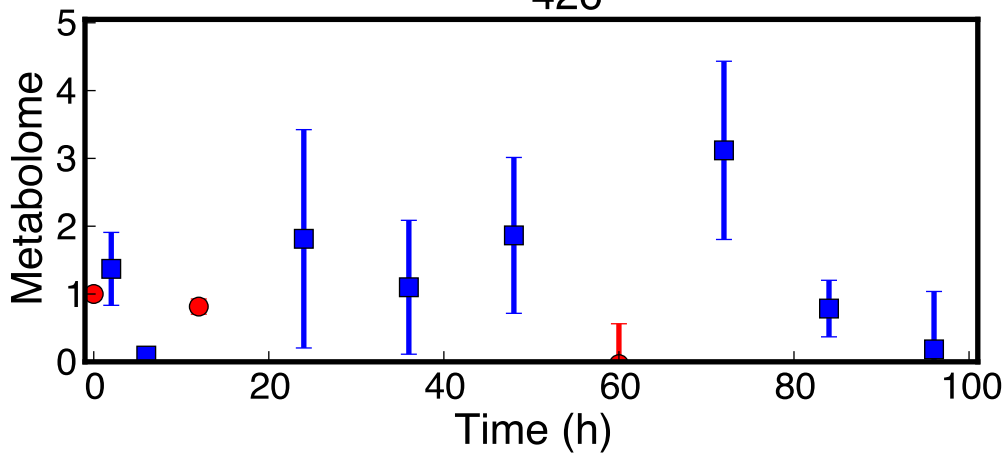

$X_{427}$

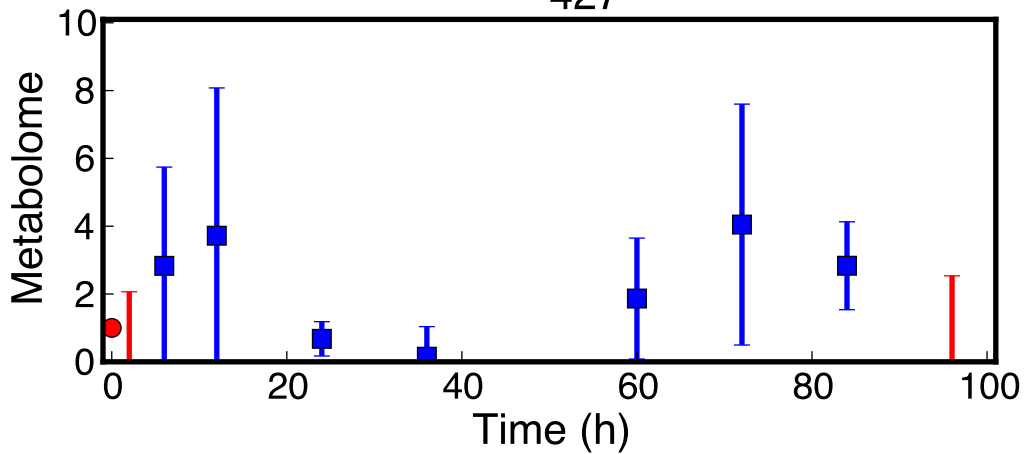

$X_{428}$ 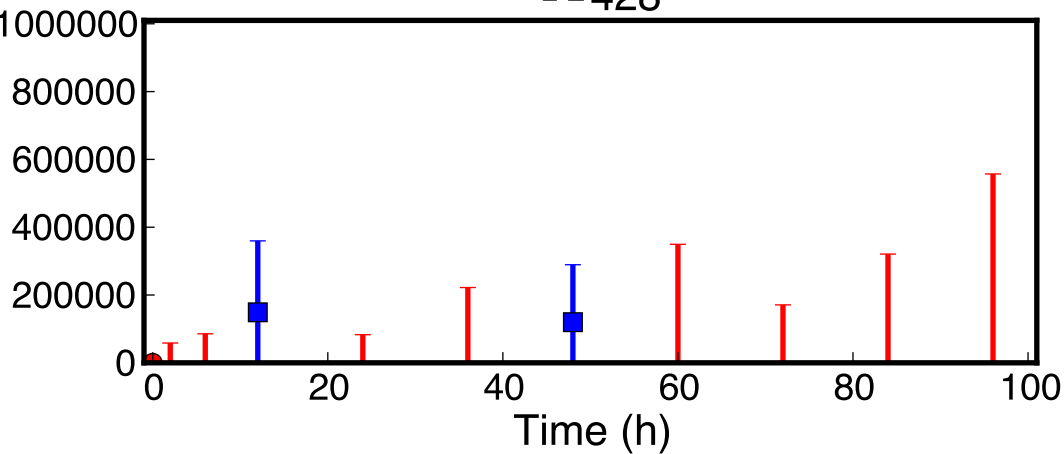

$X_{429}$

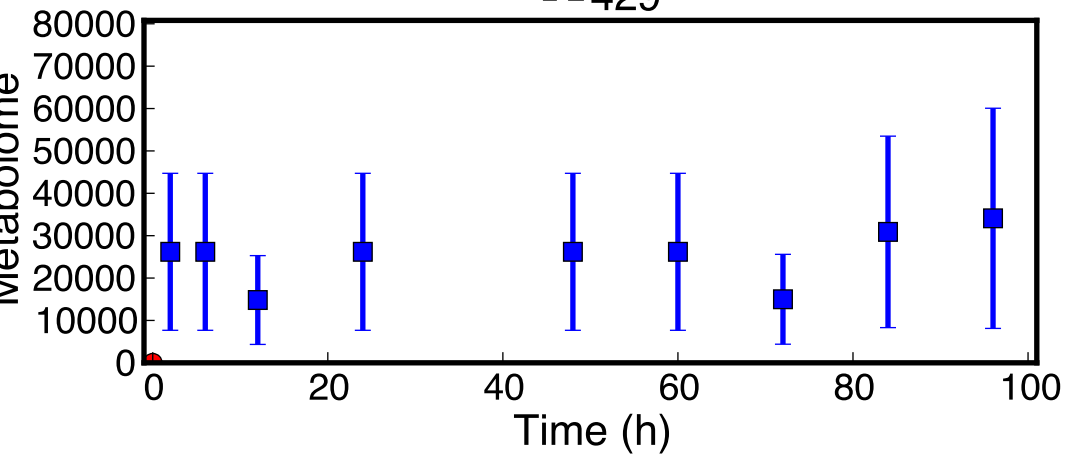

$X_{430}$

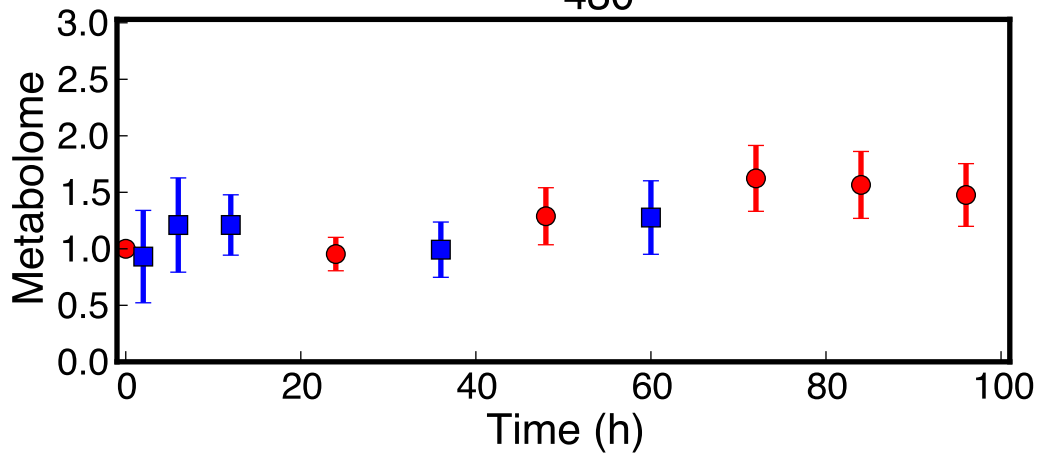

$X_{431}$

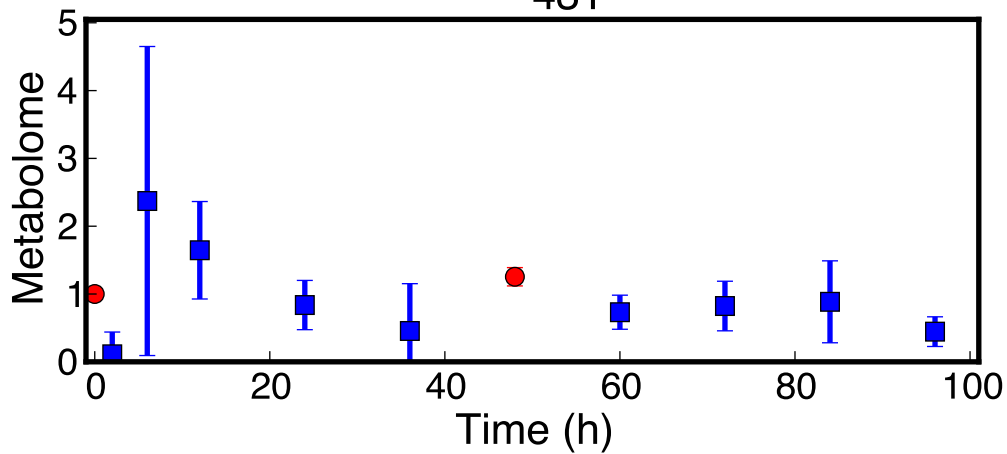

$X_{432}$

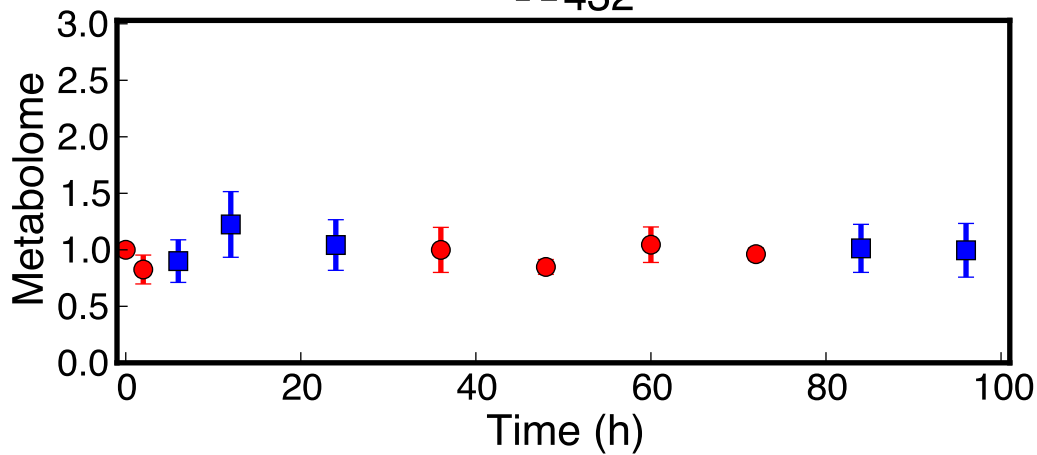



$X_{433}$

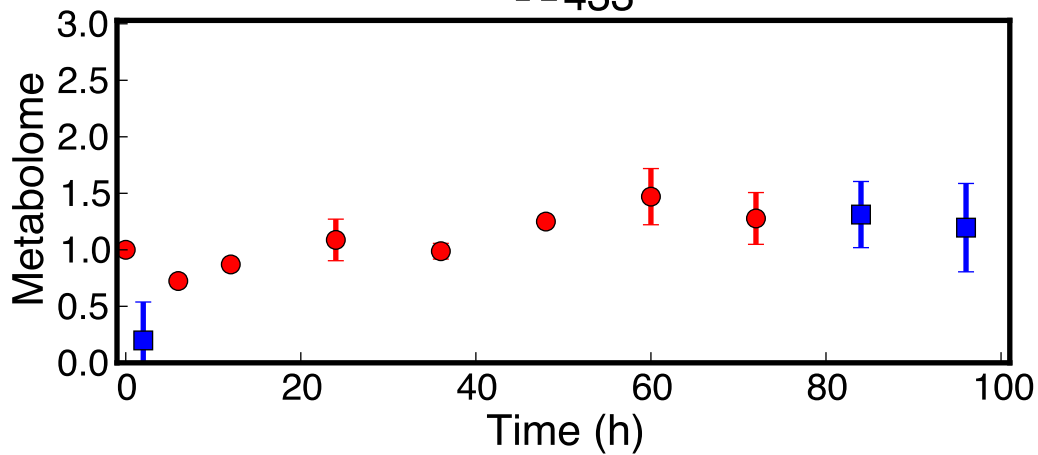

$X_{434}$

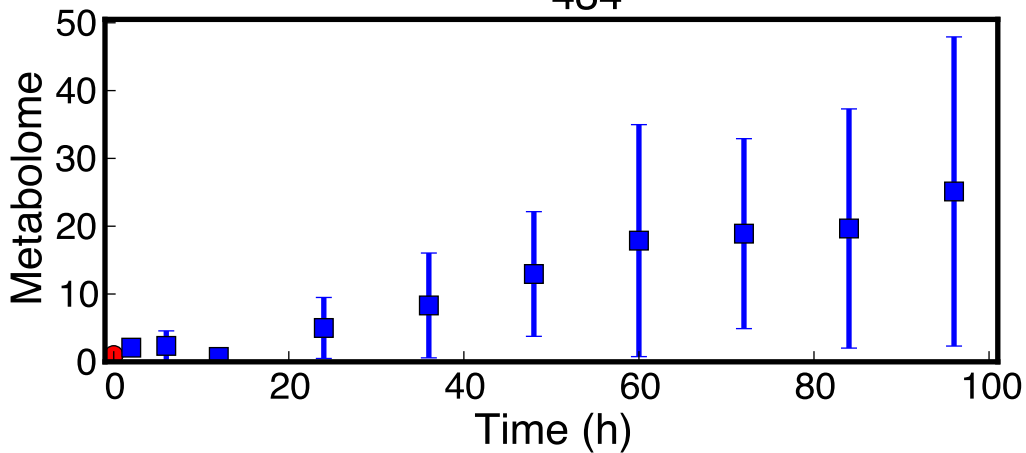

$X_{435}$

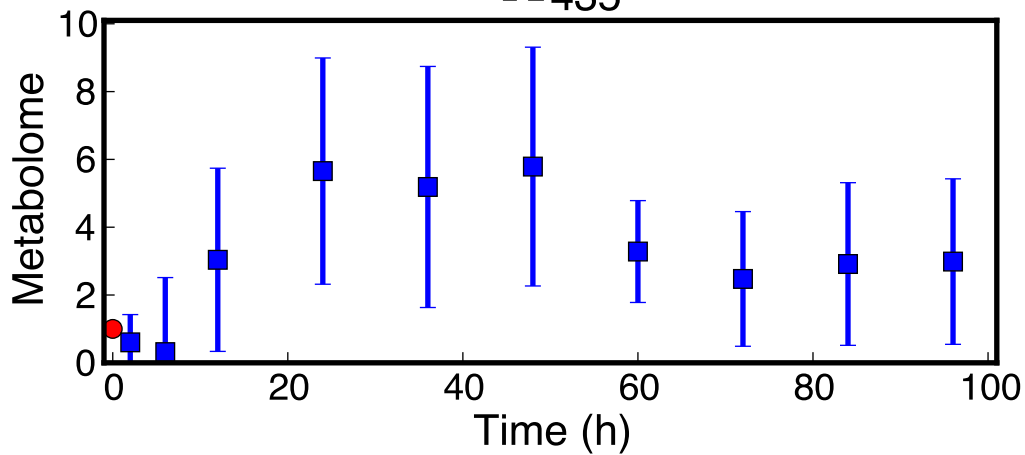

$X_{436}$

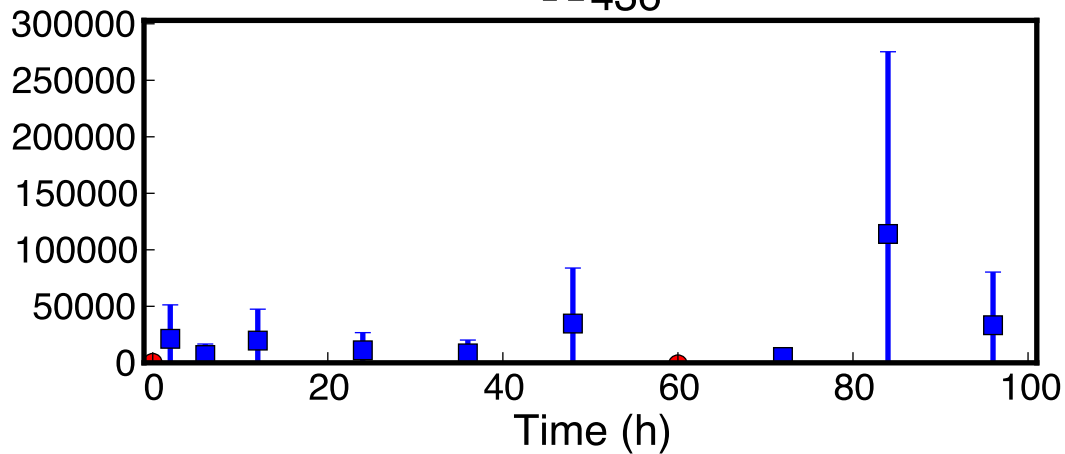

$X_{437}$

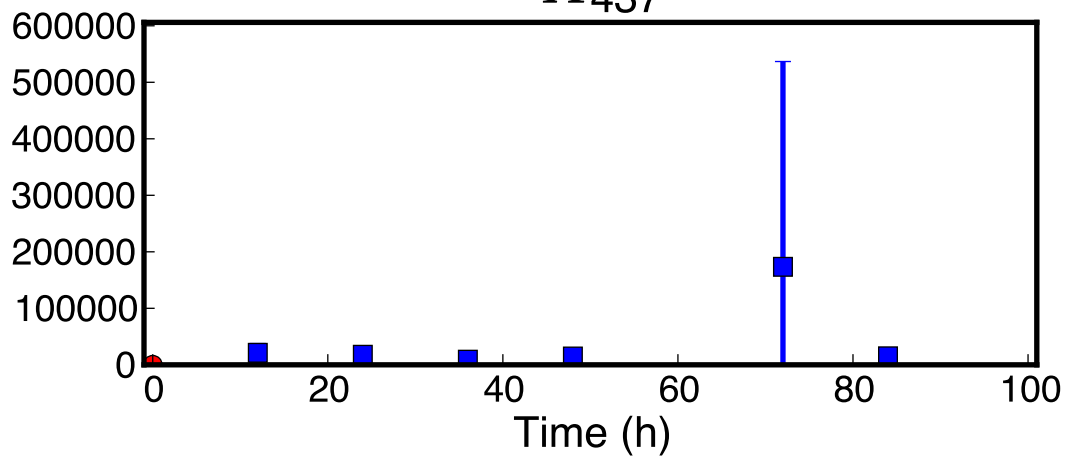

$X_{438}$

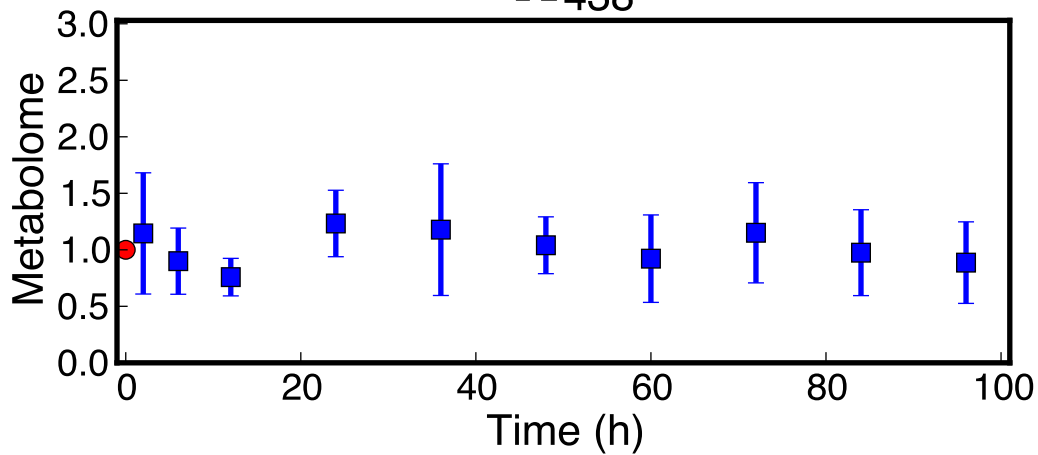

$X_{439}$

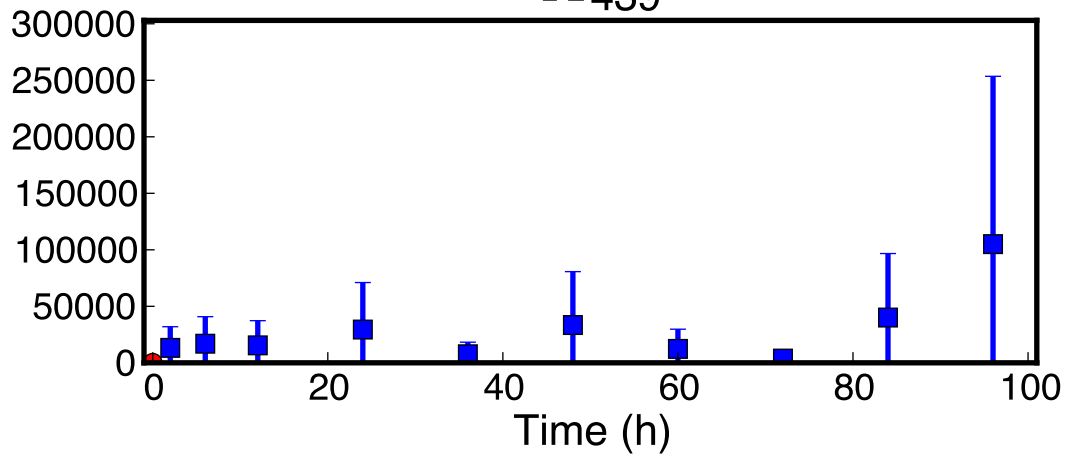

$X_{440}$

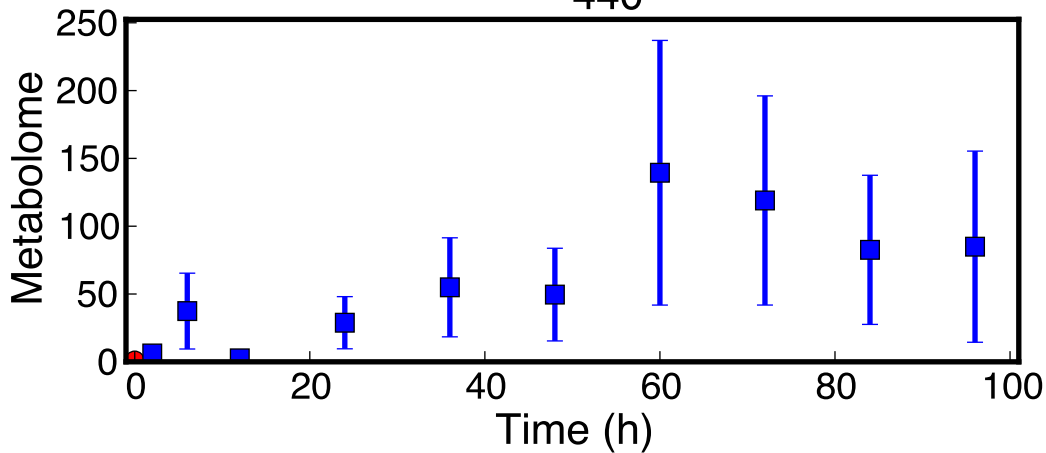



$X_{441}$

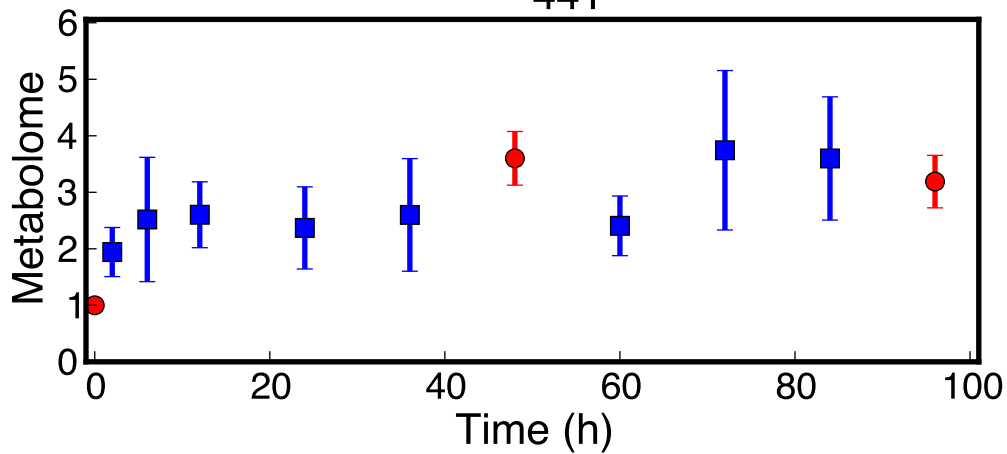

$X_{442}$

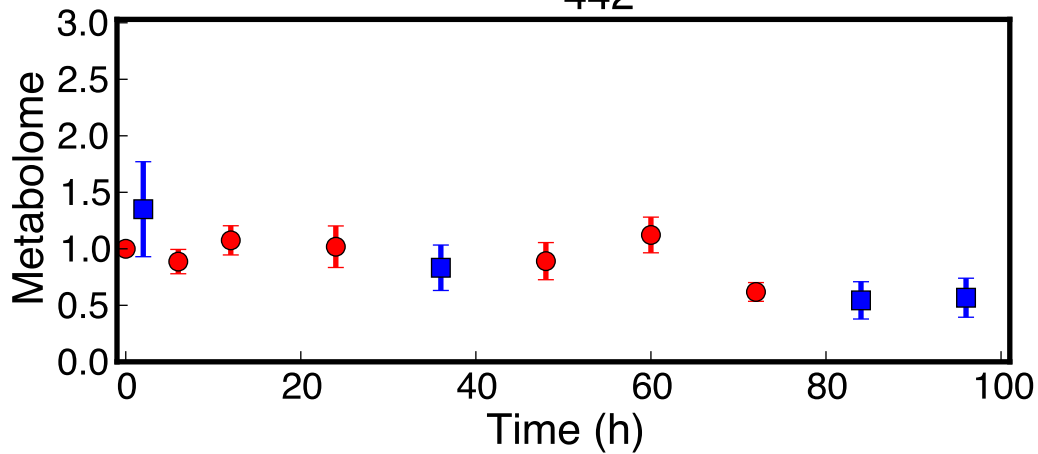

$X_{443}$

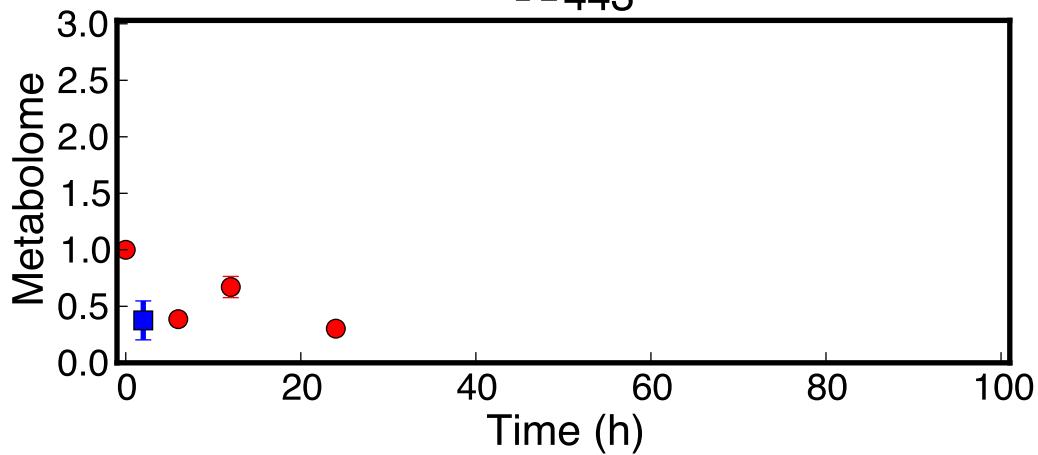

$X_{444}$

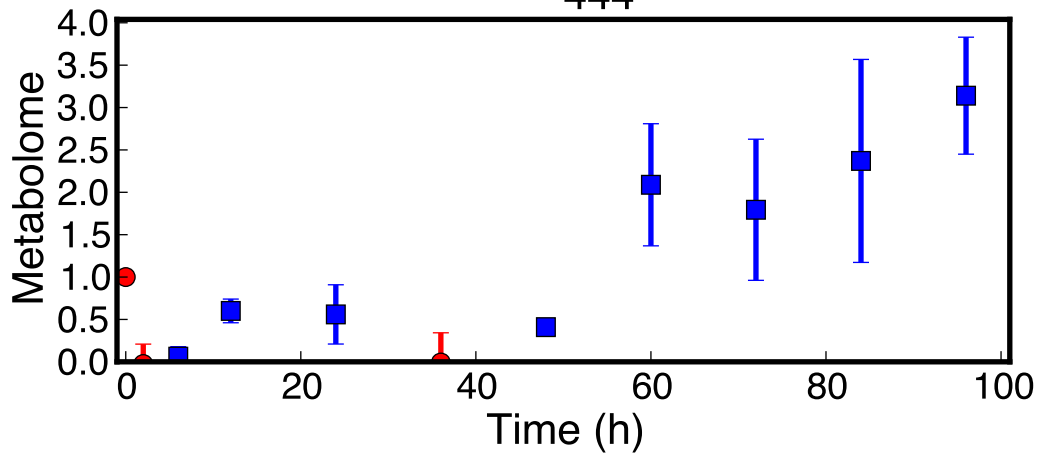

$X_{445}$

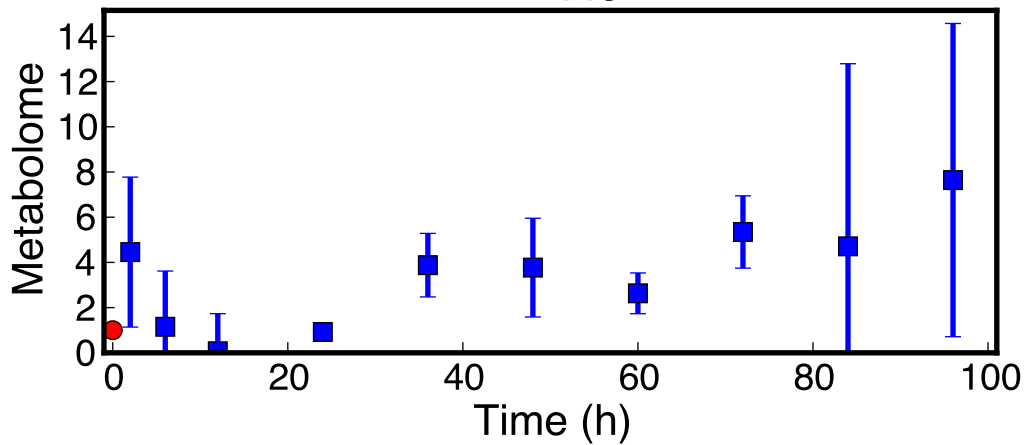

$X_{446}$

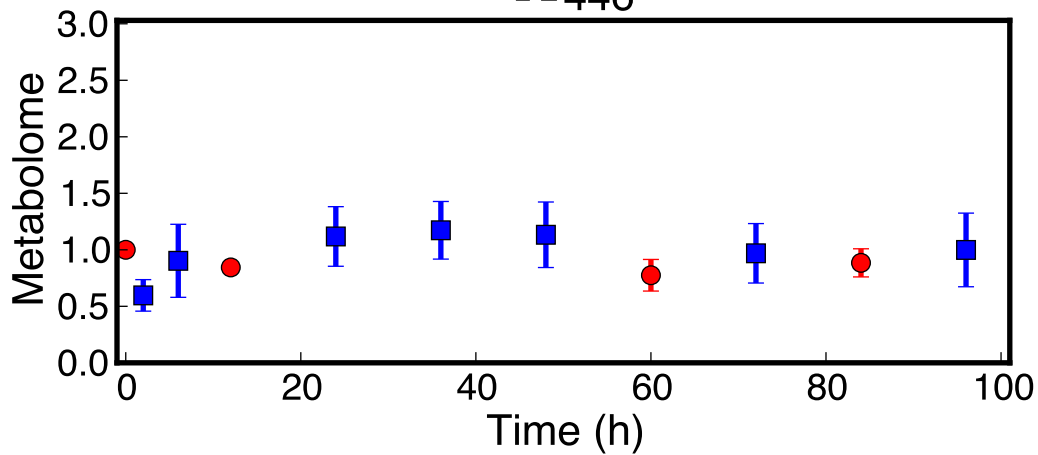

$X_{447}$

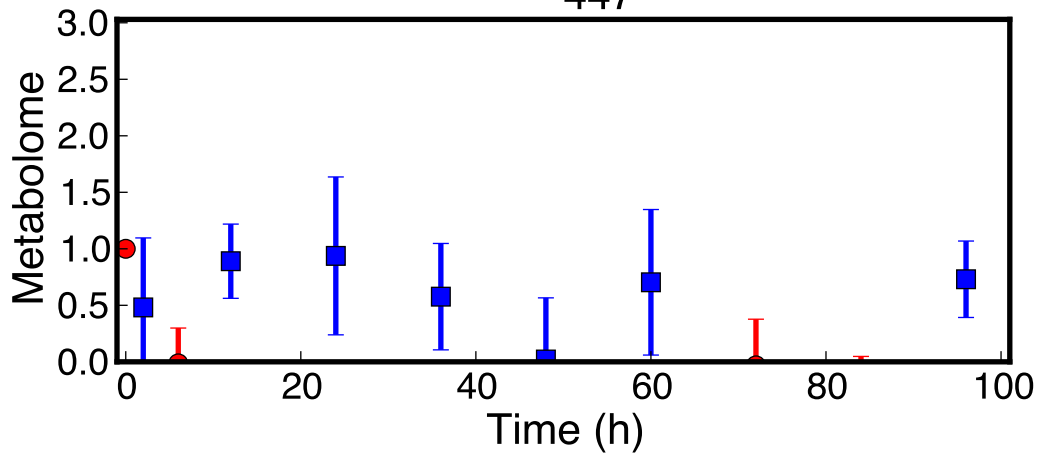

$X_{448}$

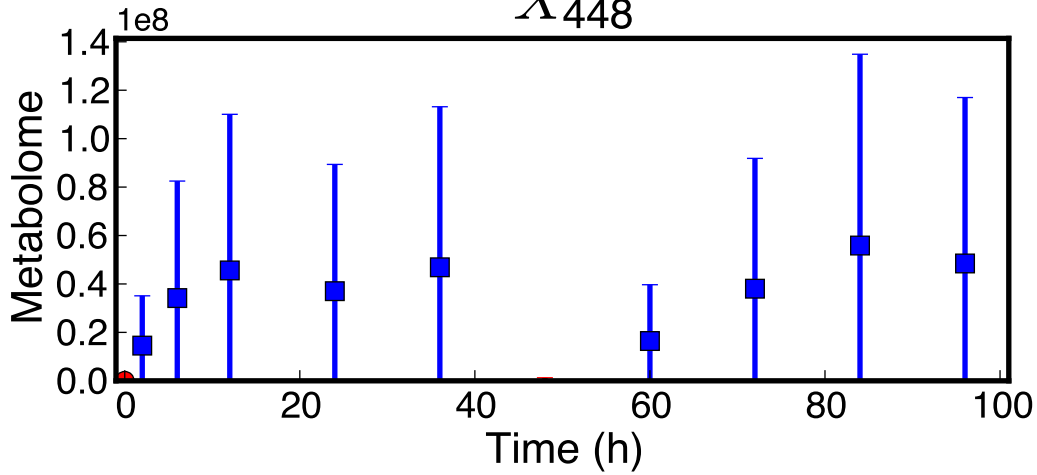



$X_{449}$

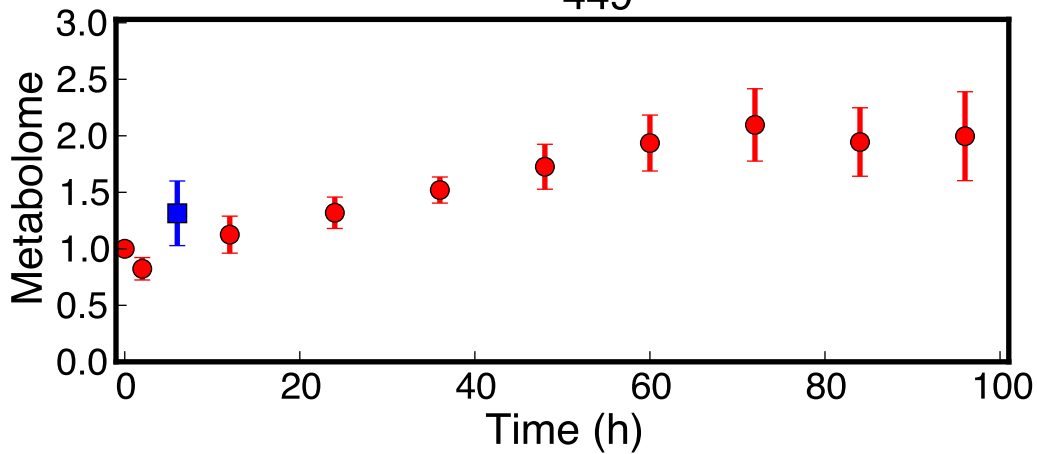

$X_{450}$

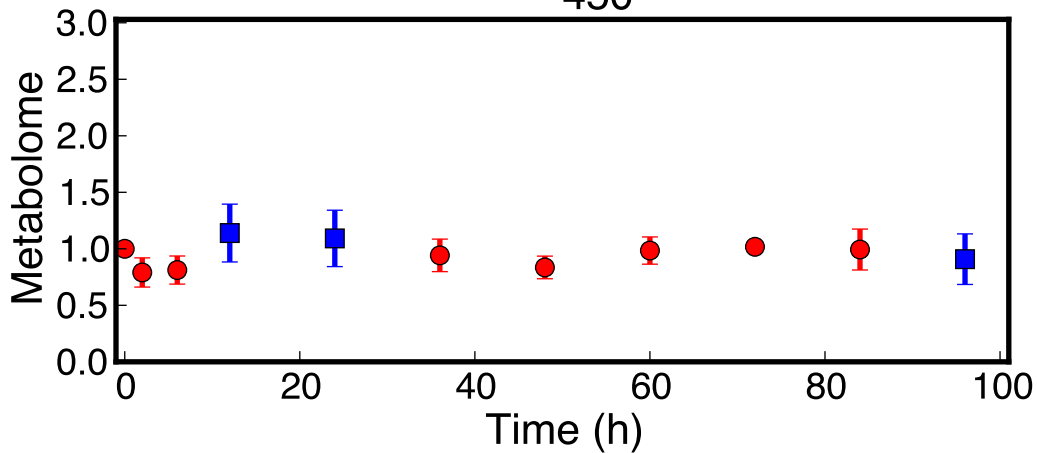

$X_{451}$

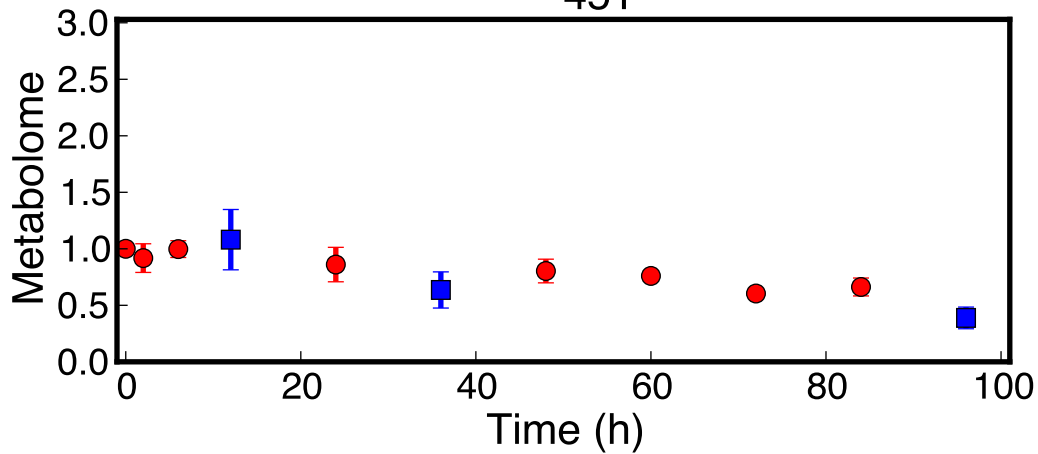

$X_{452}$

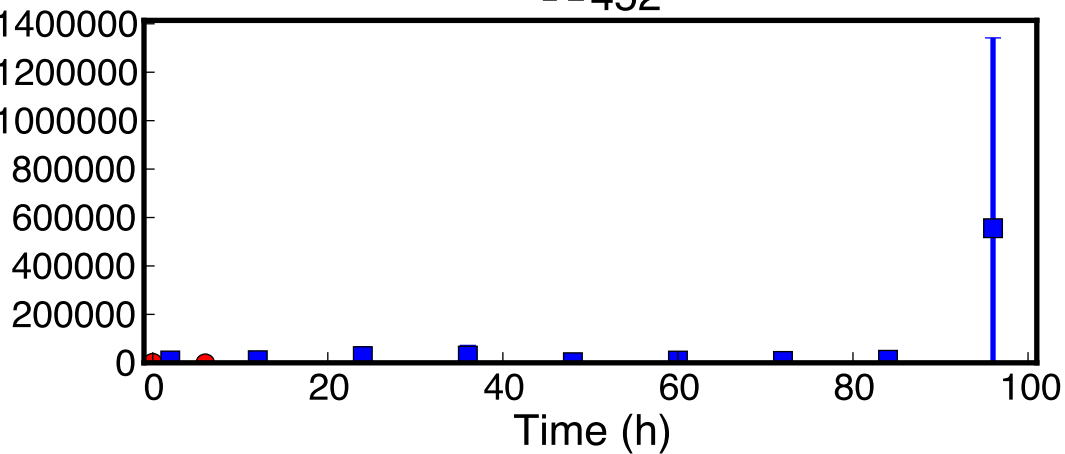

$X_{453}$

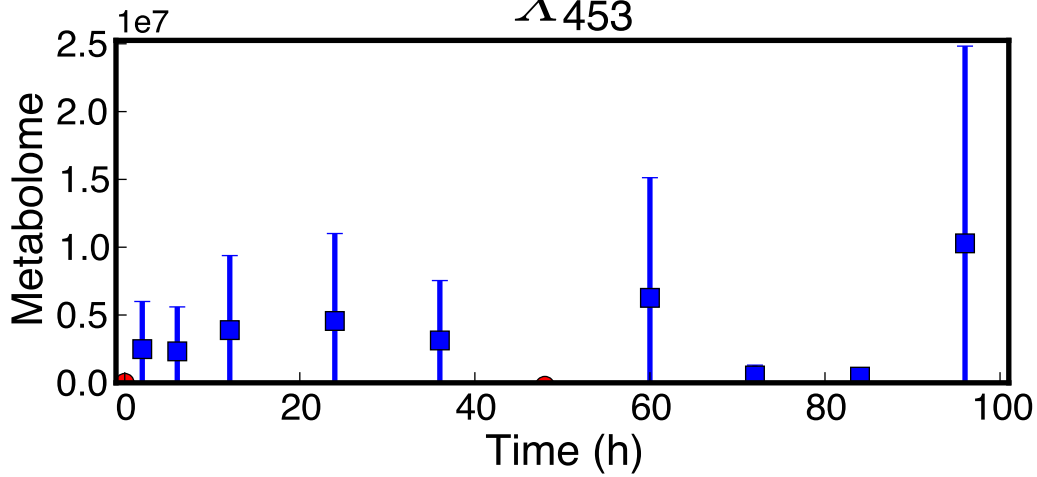

$X_{454}$

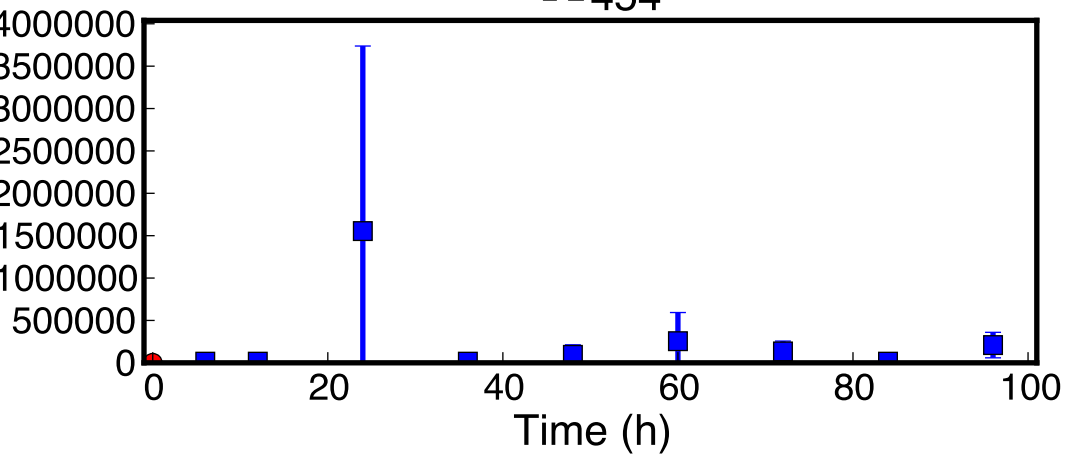

$X_{455}$

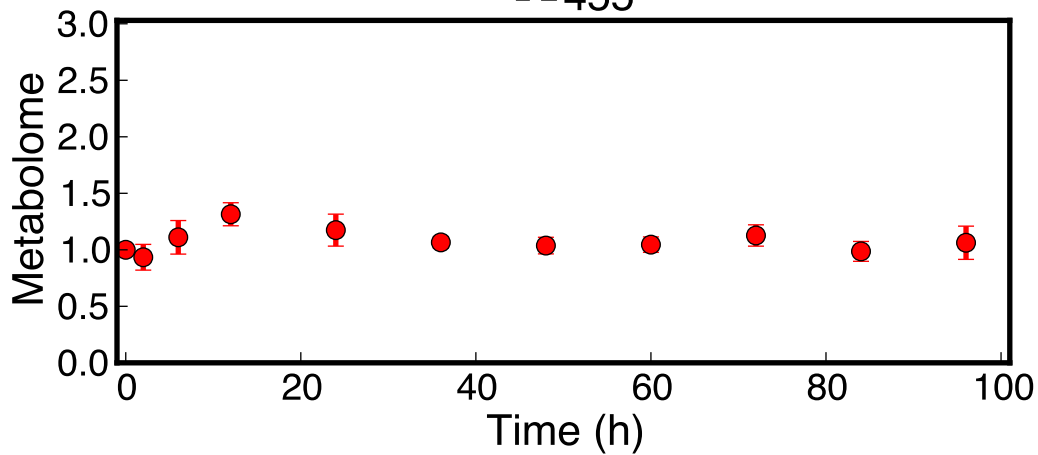

$X_{456}$

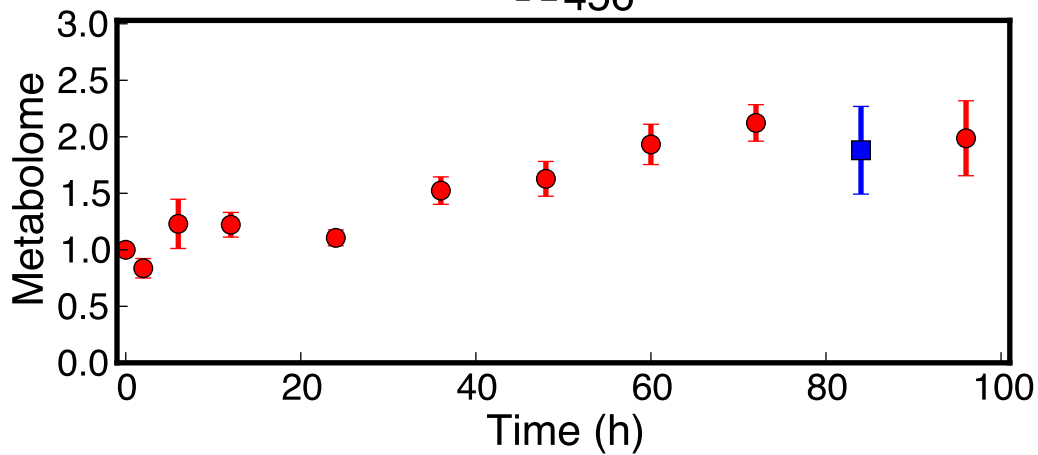



$X_{457}$

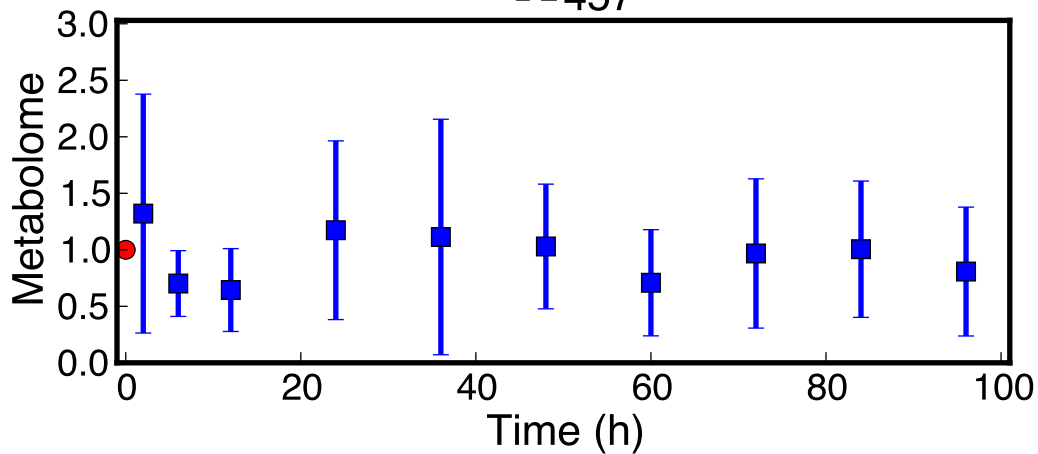

$X_{458}$

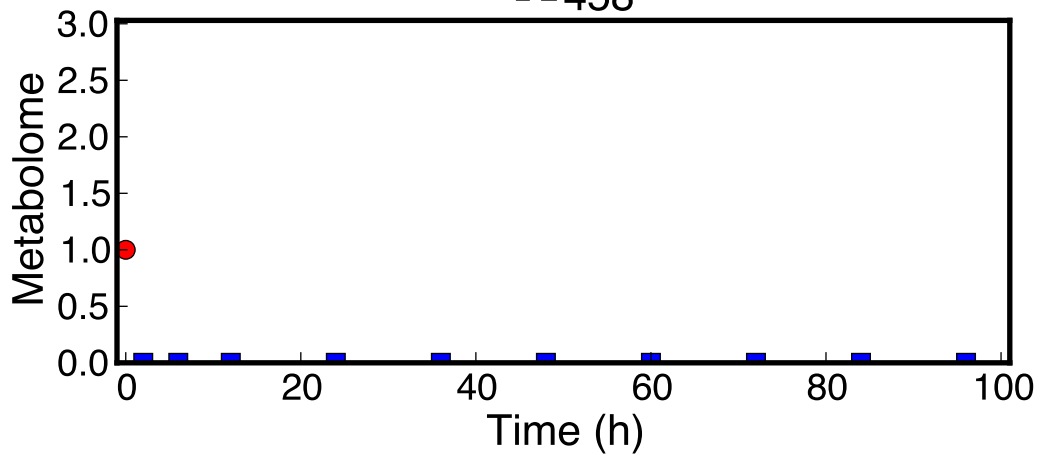

$X_{459}$

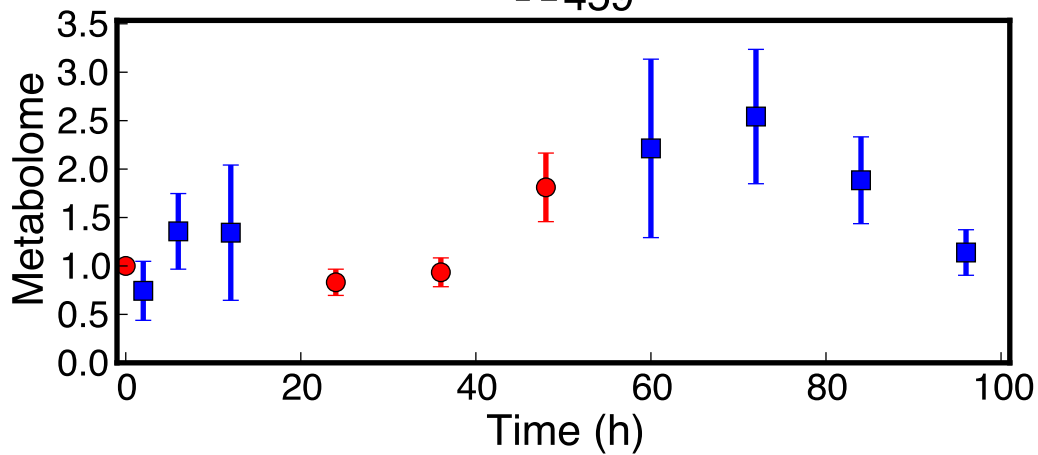

$X_{460}$

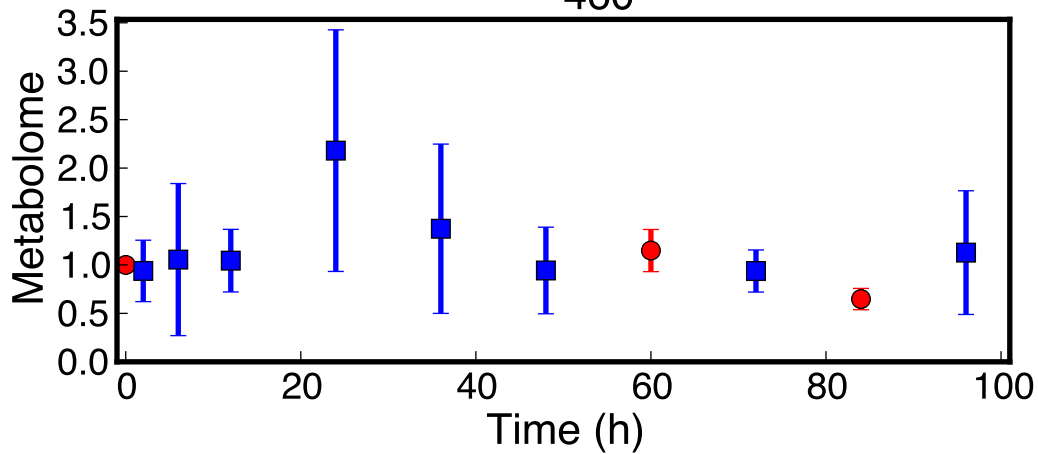

$X_{461}$

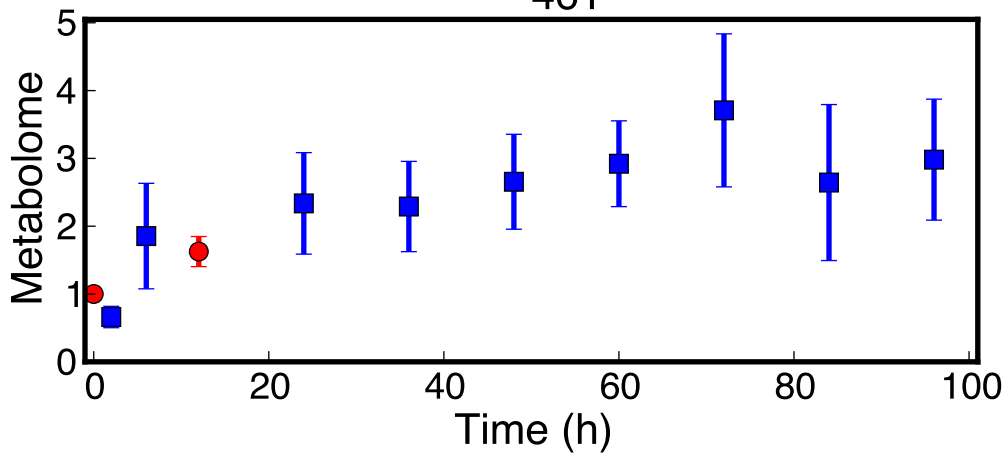

$X_{462}$

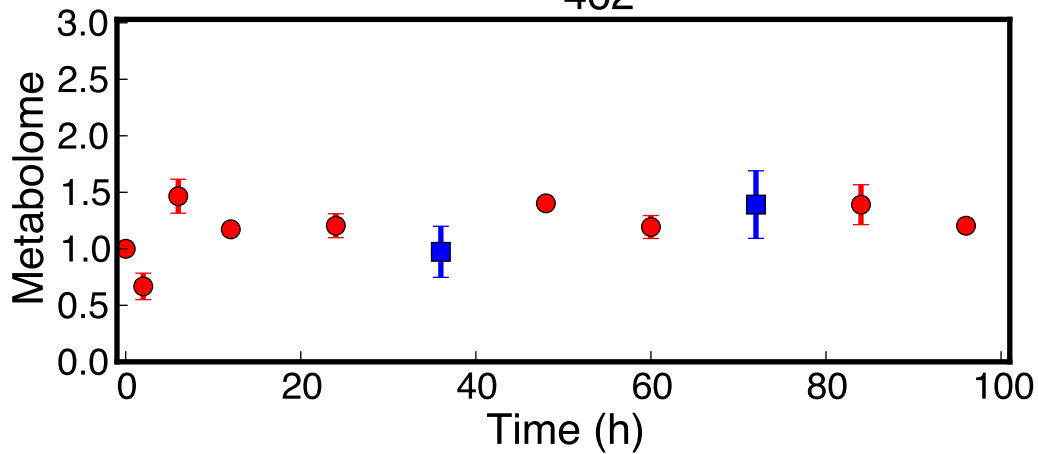

$X_{463}$

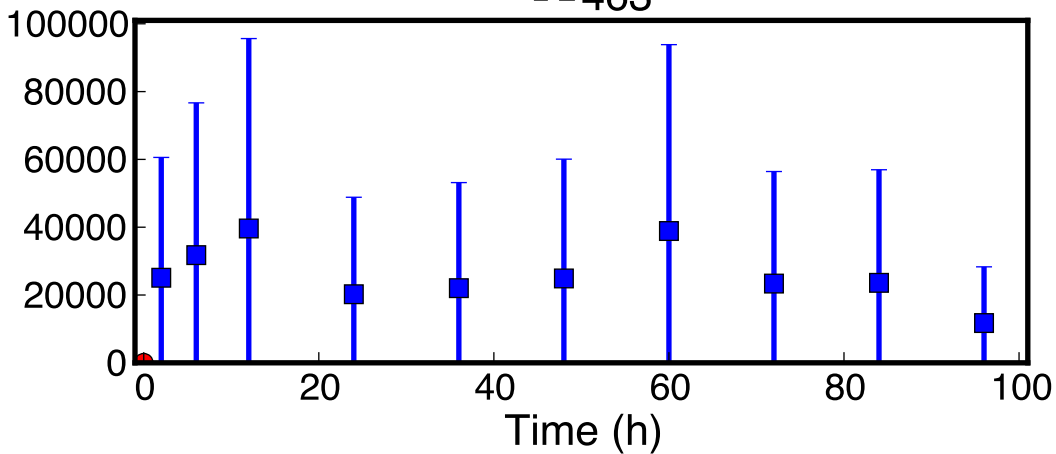

$X_{464}$

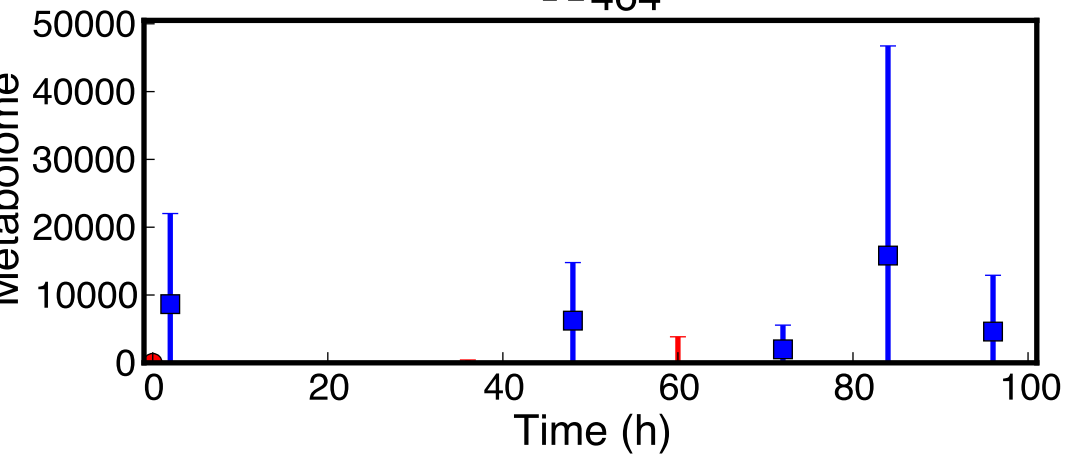



$X_{465}$

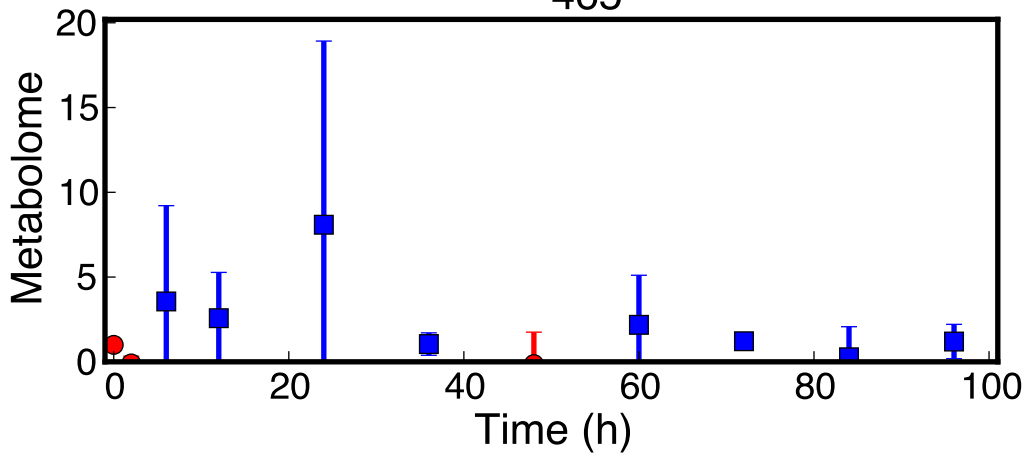

$X_{466}$

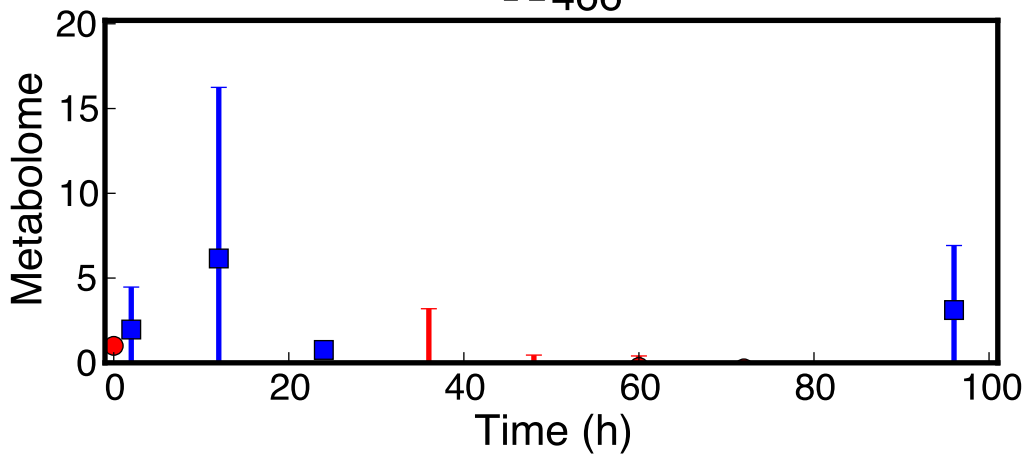

$X_{467}$

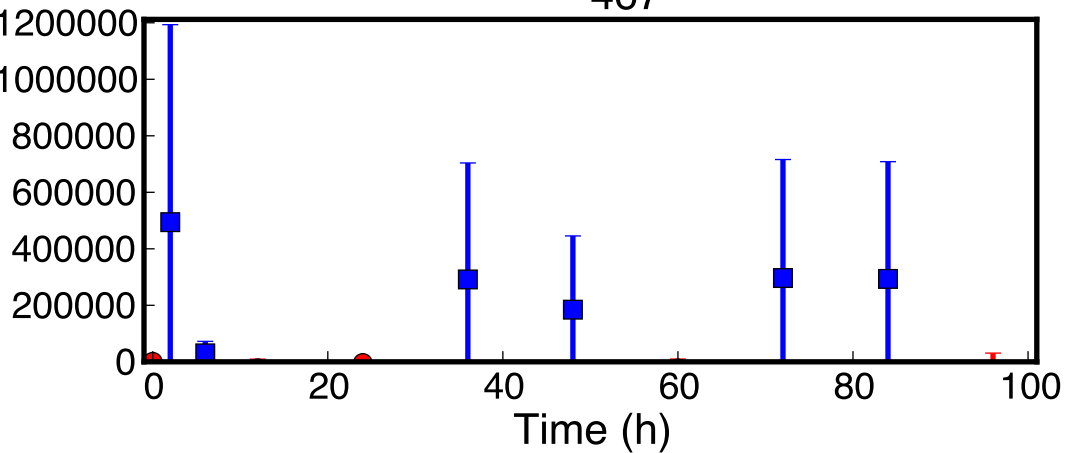

$X_{468}$

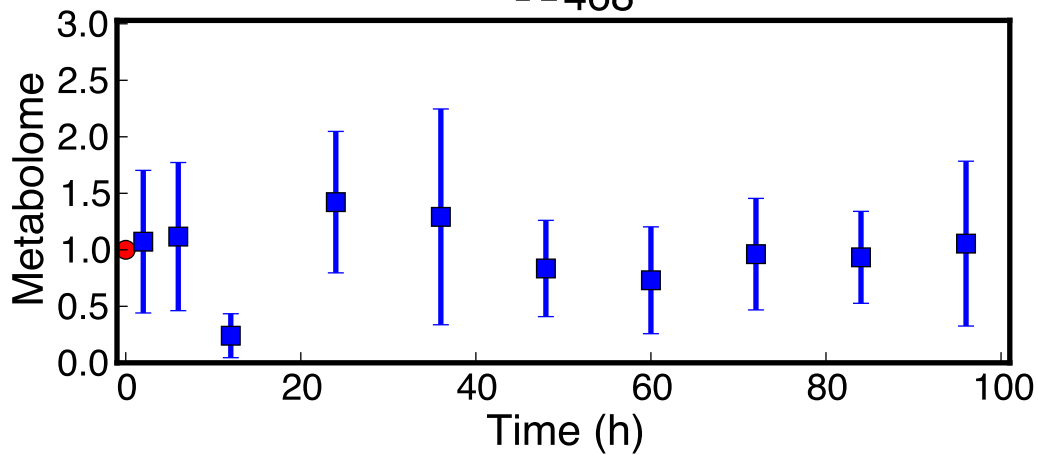

$X_{469}$

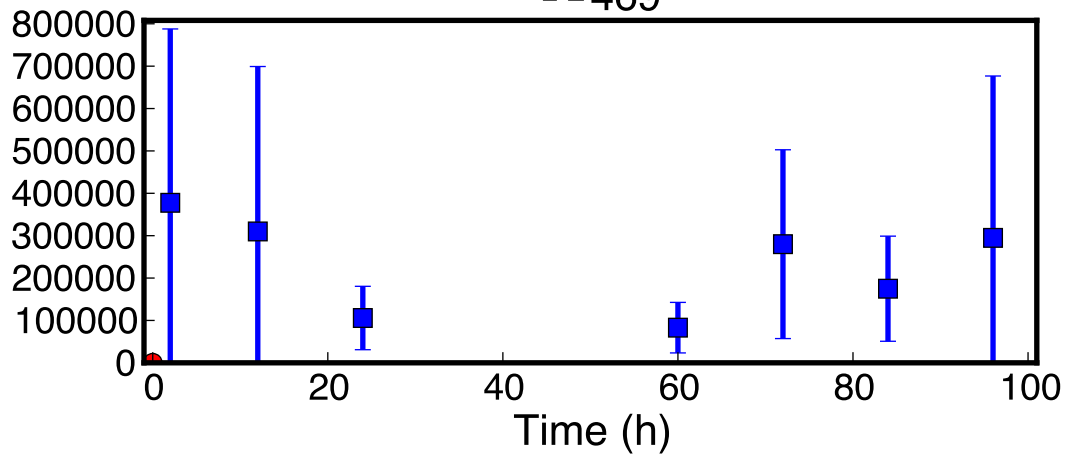

$X_{470}$

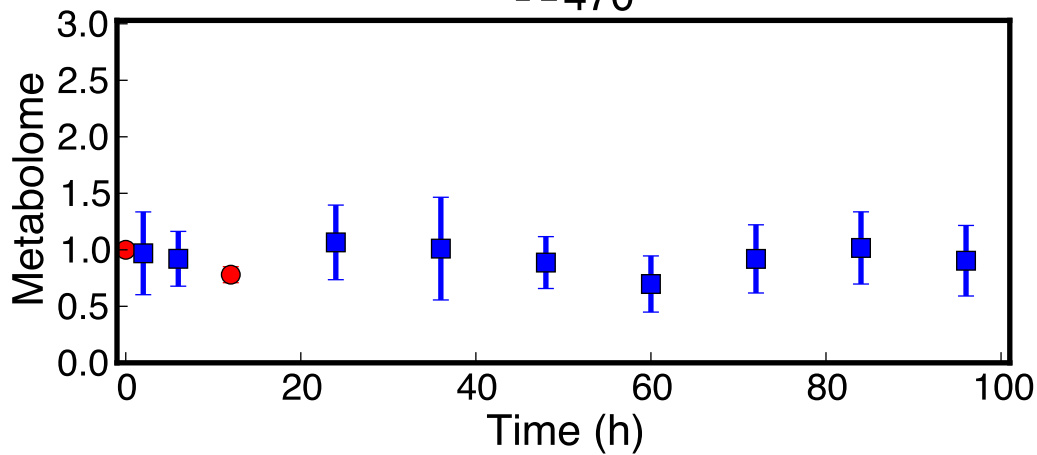

$X_{471}$

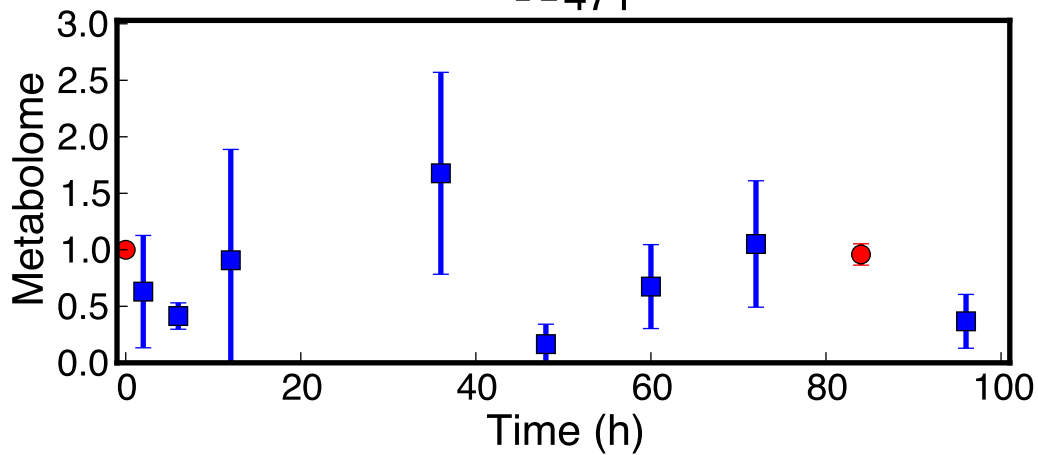

$X_{472}$

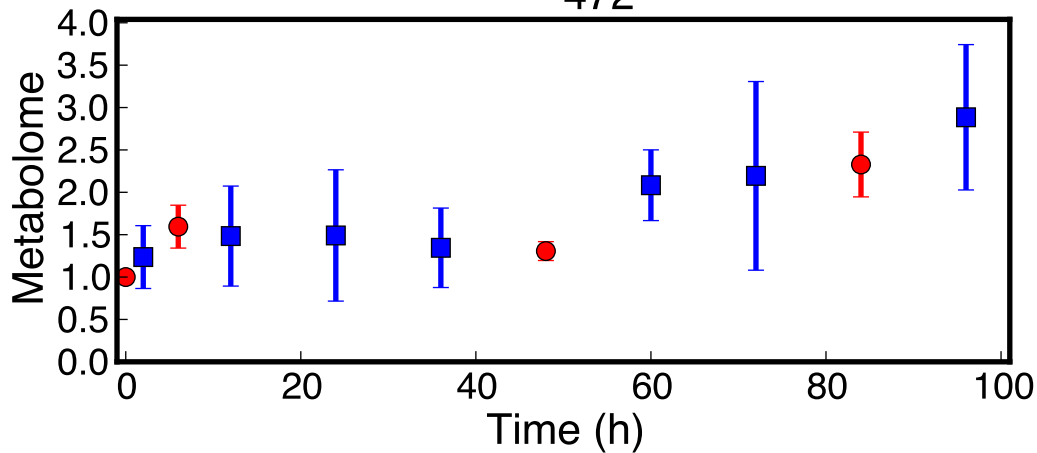



$X_{473}$

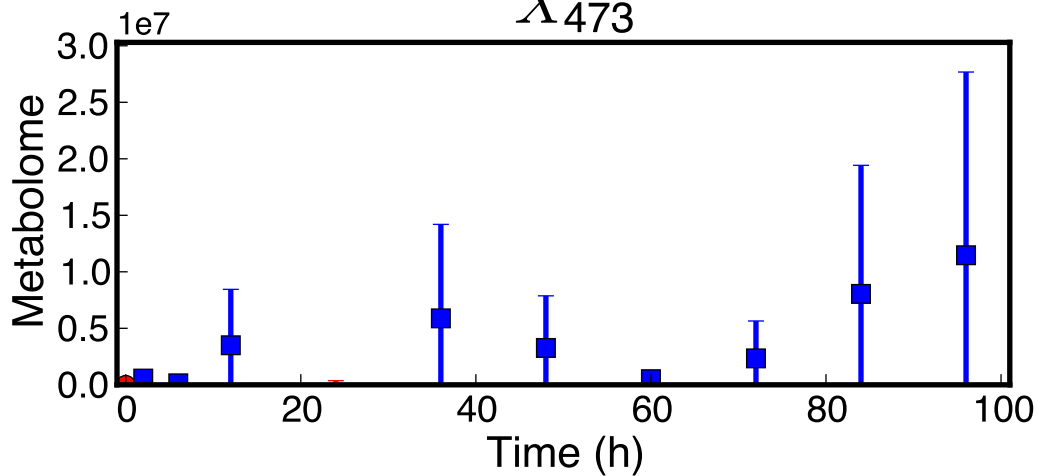

$X_{474}$

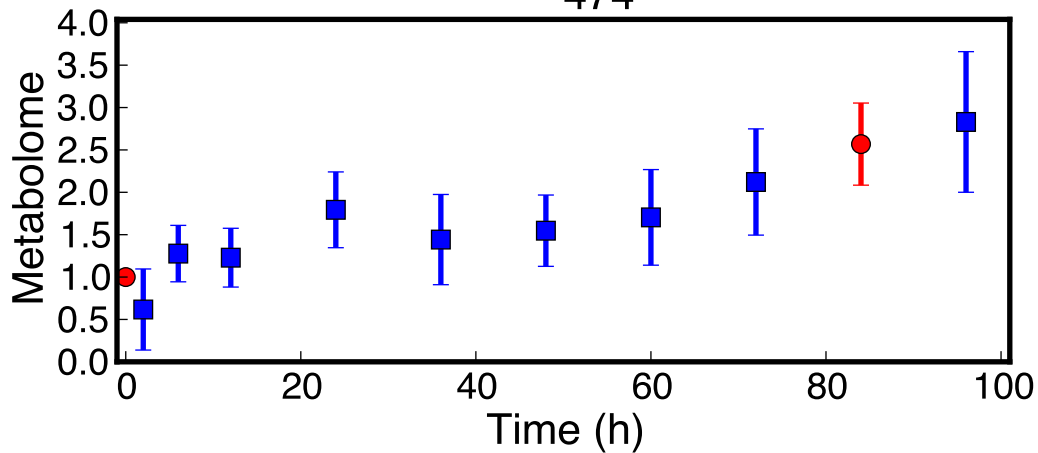

$X_{475}$ 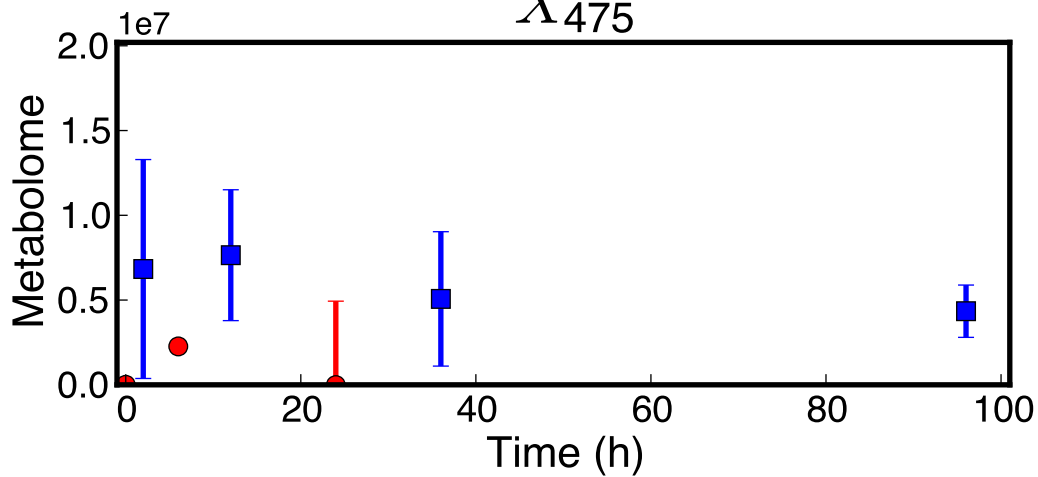

$X_{476}$

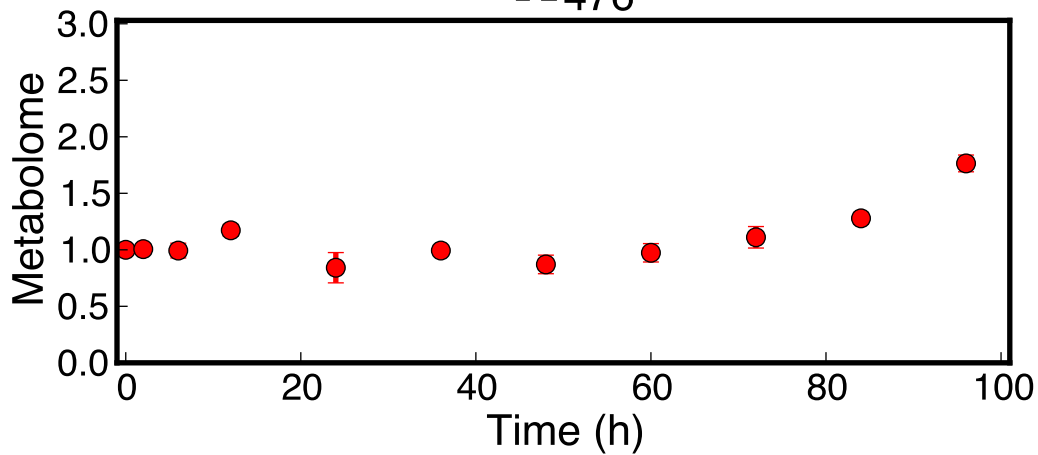

$X_{477}$

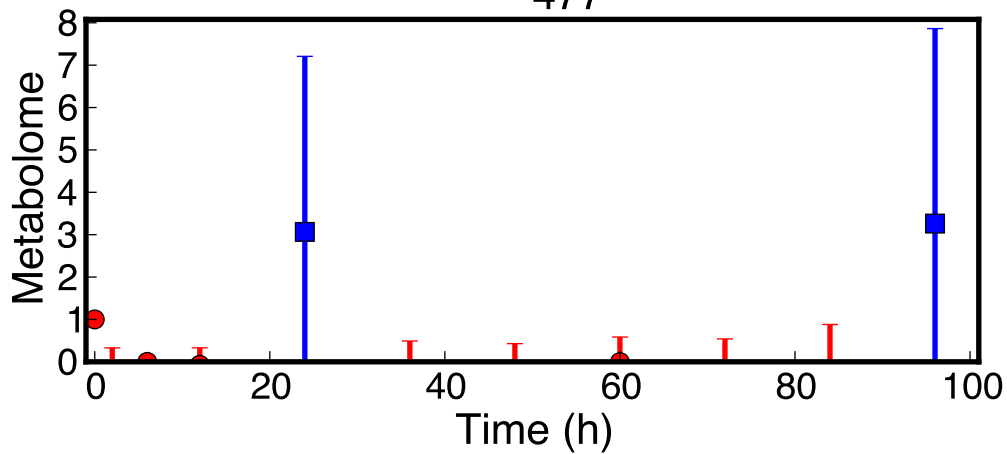

$X_{478}$

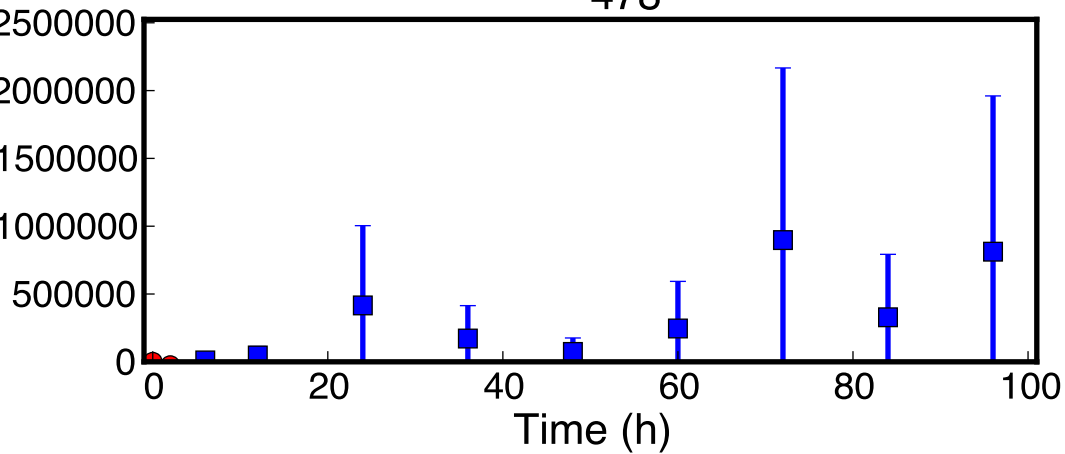

$X_{479}$

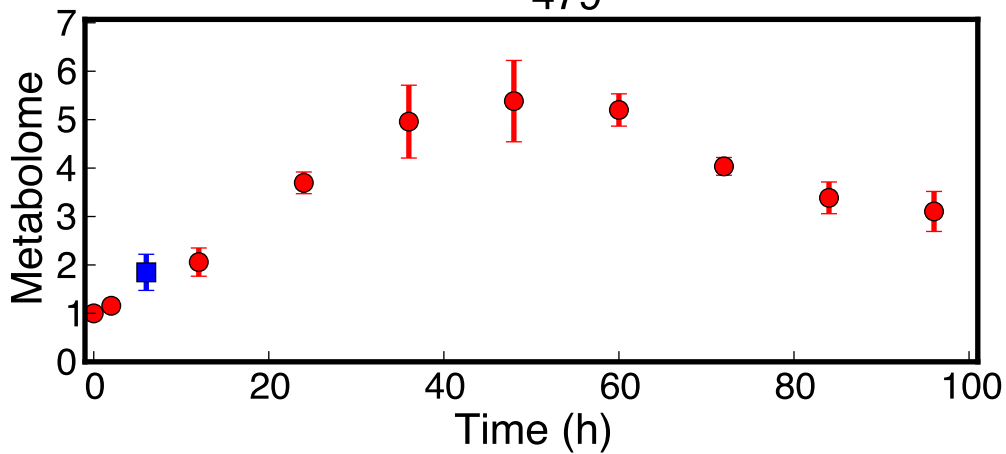

$X_{480}$

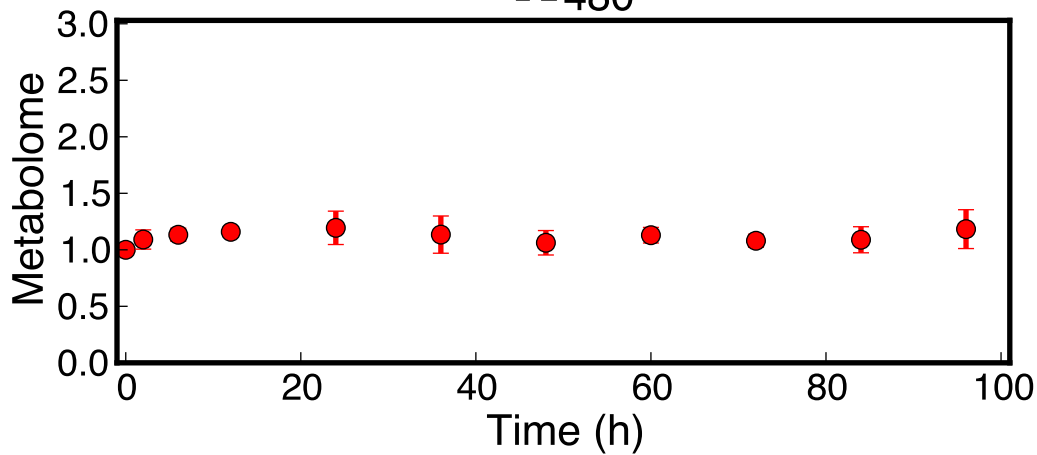



$X_{481}$

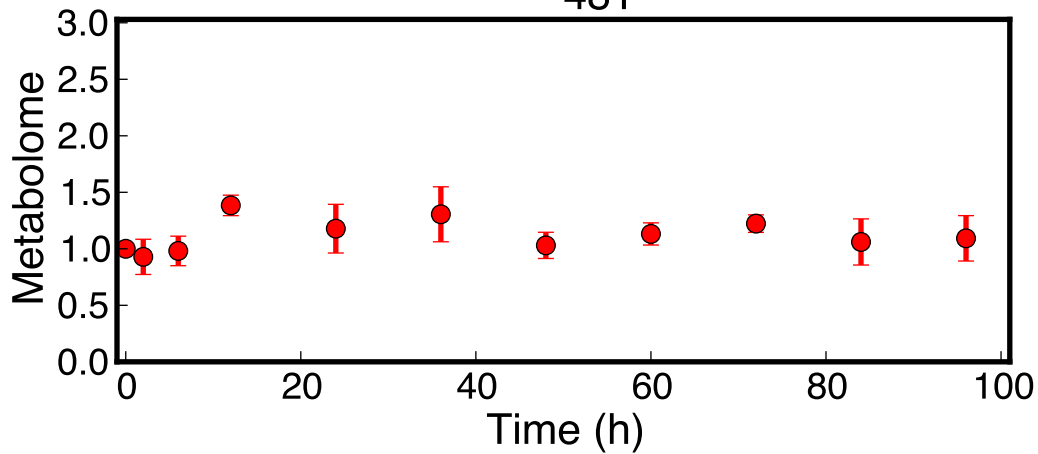

$X_{482}$

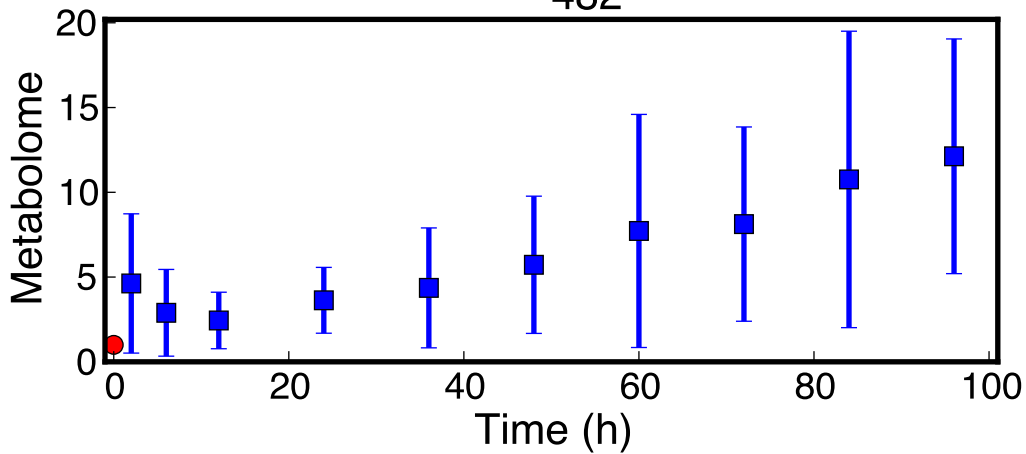

$X_{483}$

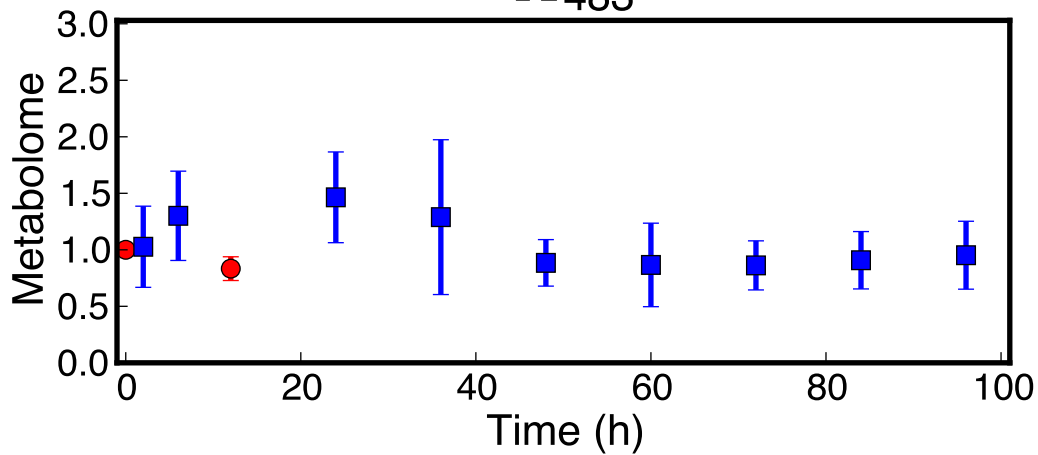

$X_{484}$

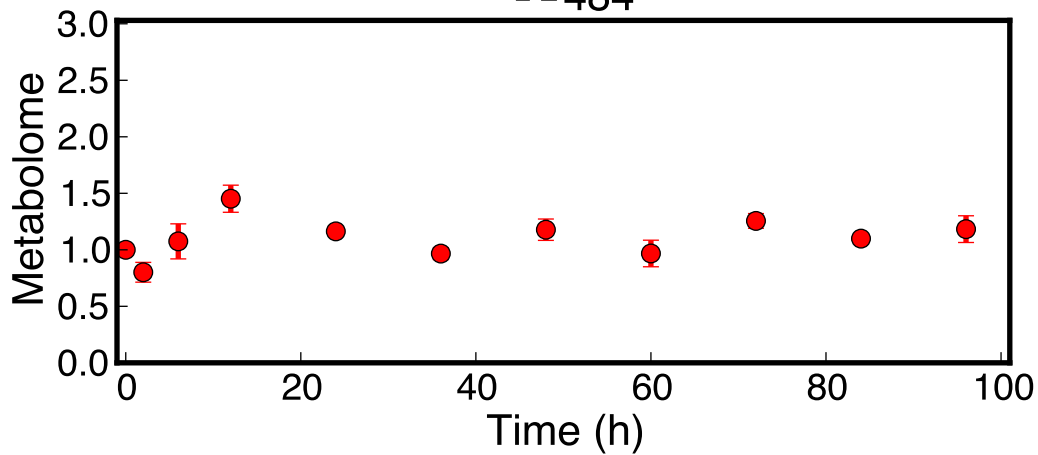

$X_{485}$

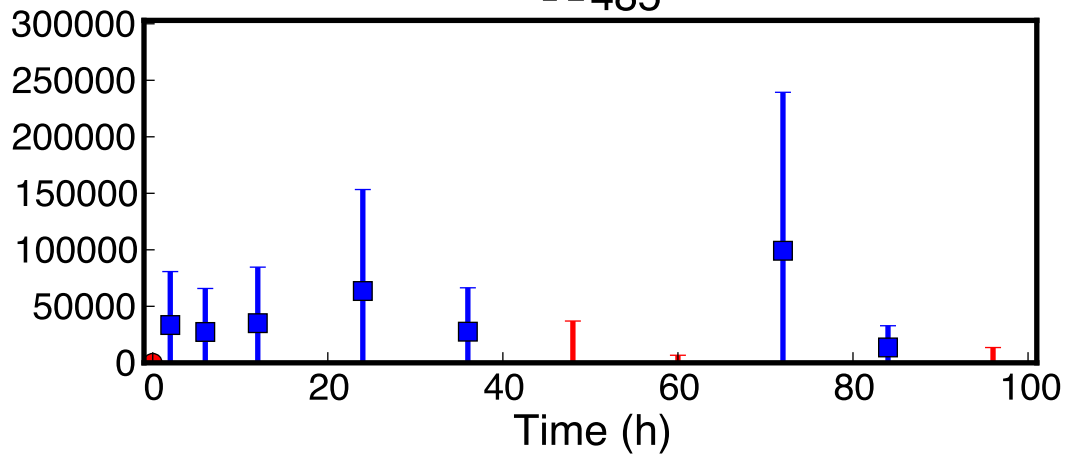

$X_{486}$

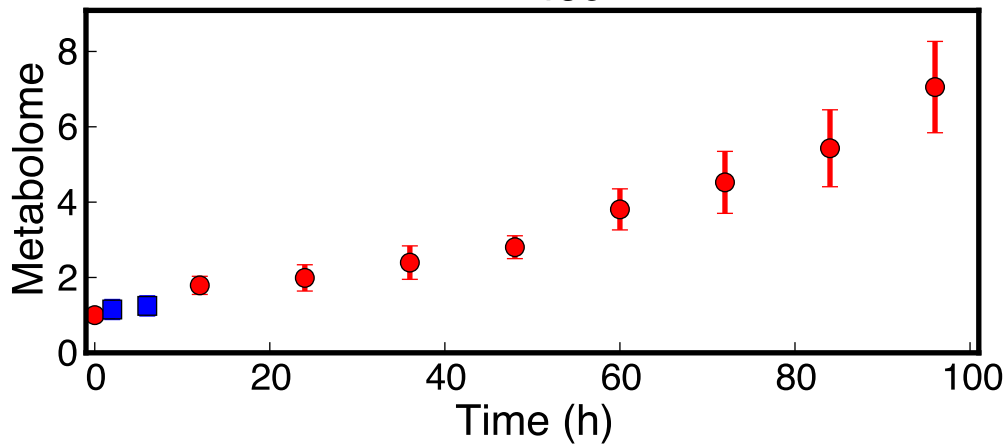

$X_{487}$

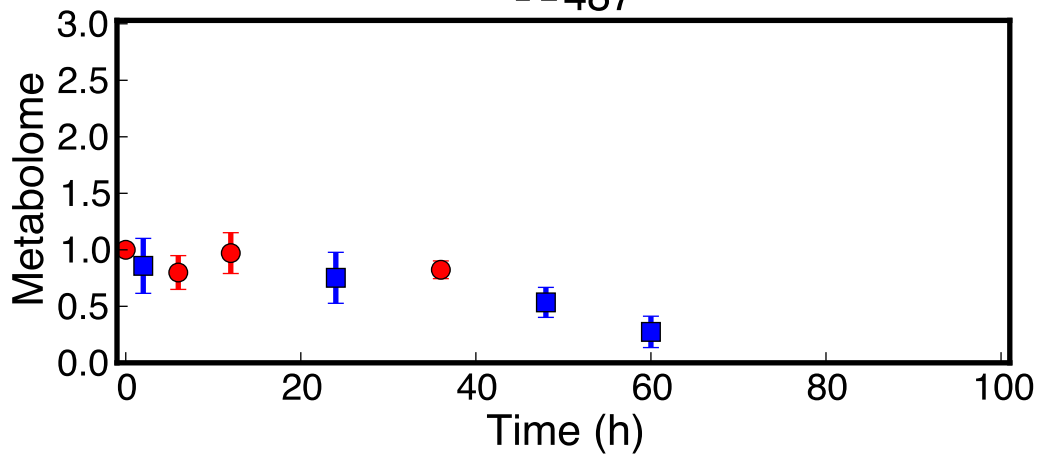

$X_{488}$

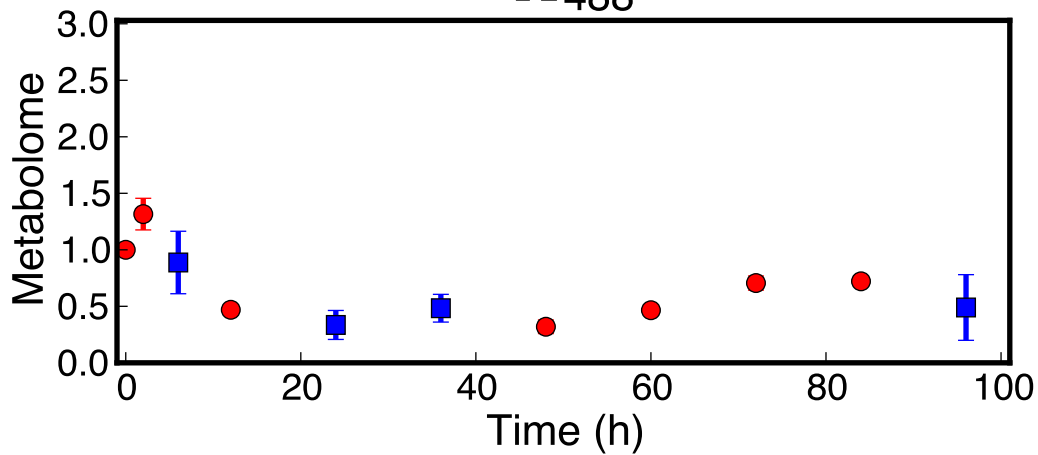



$X_{489}$

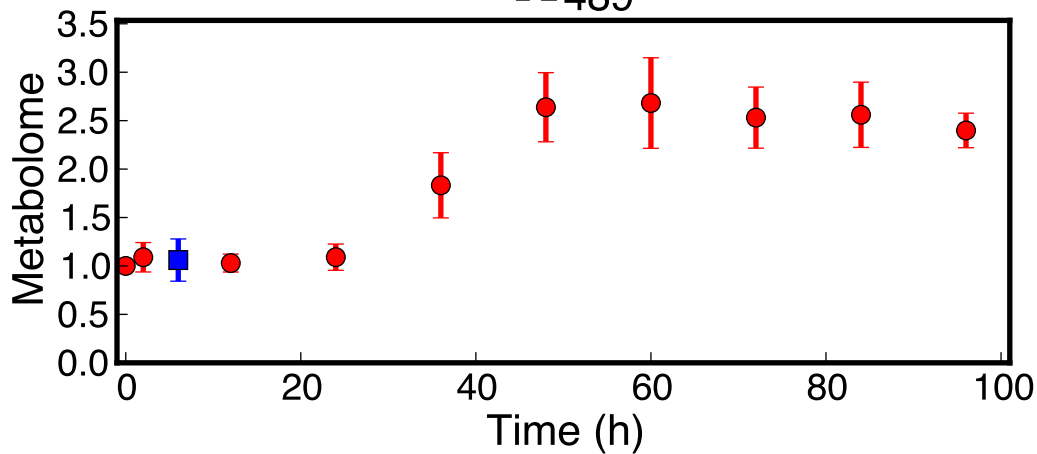

$X_{490}$

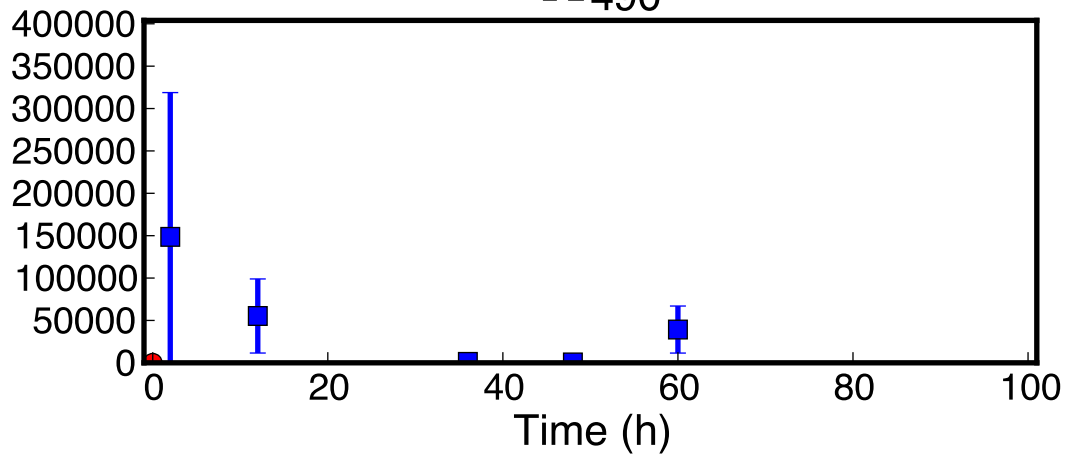

$X_{491}$

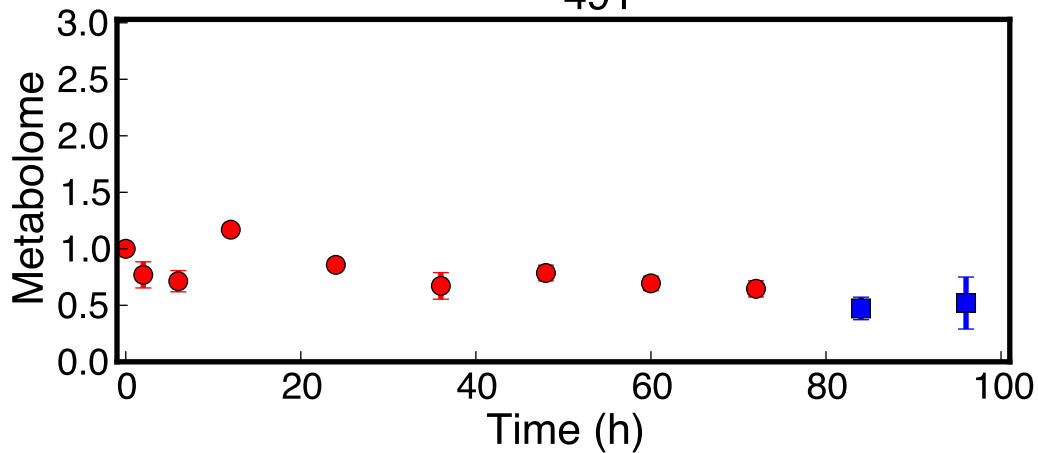

$X_{492}$

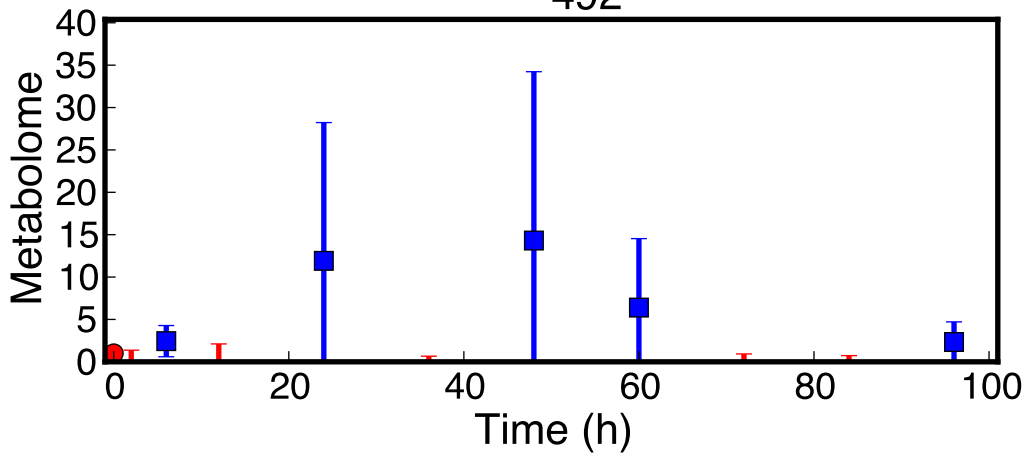

$X_{493}$

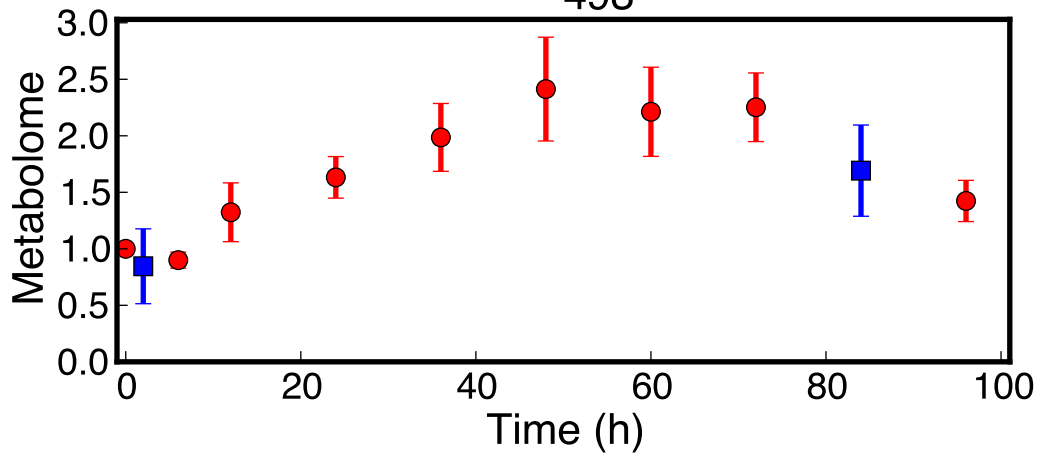

$X_{494}$

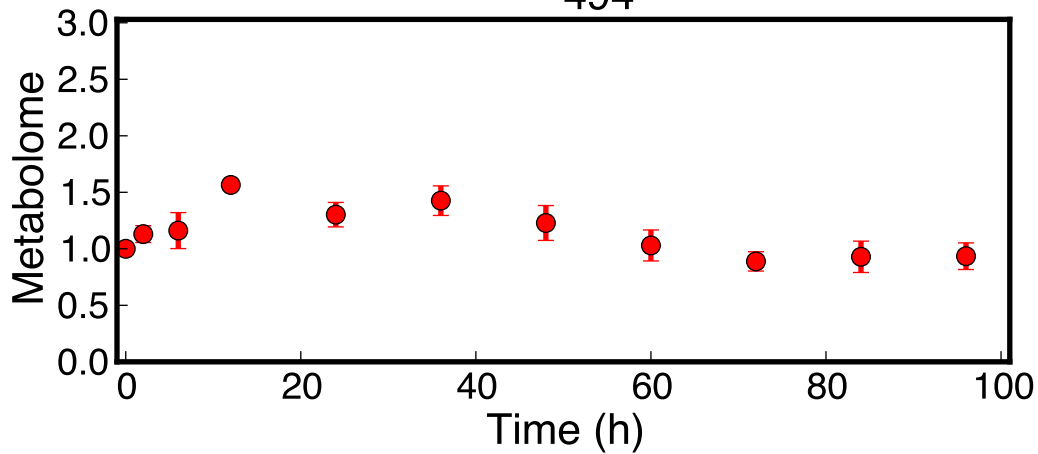

$X_{495}$

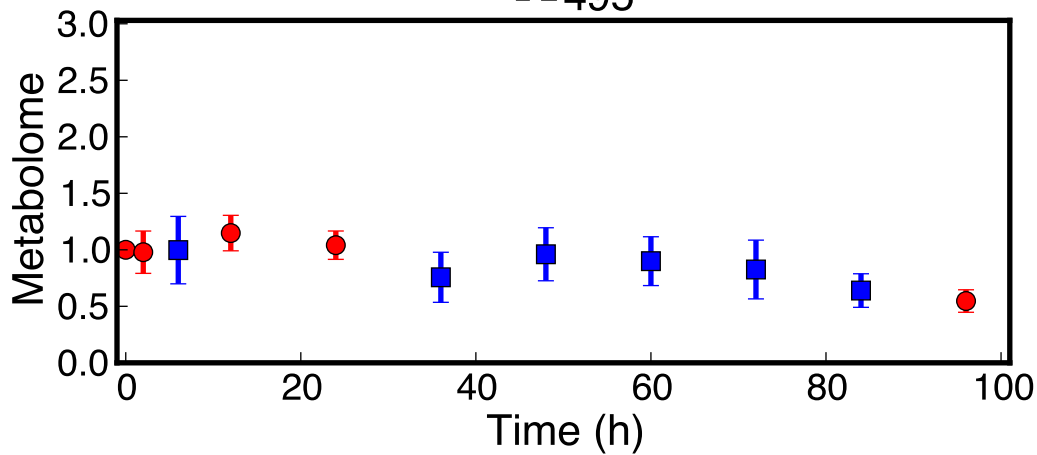

$X_{496}$

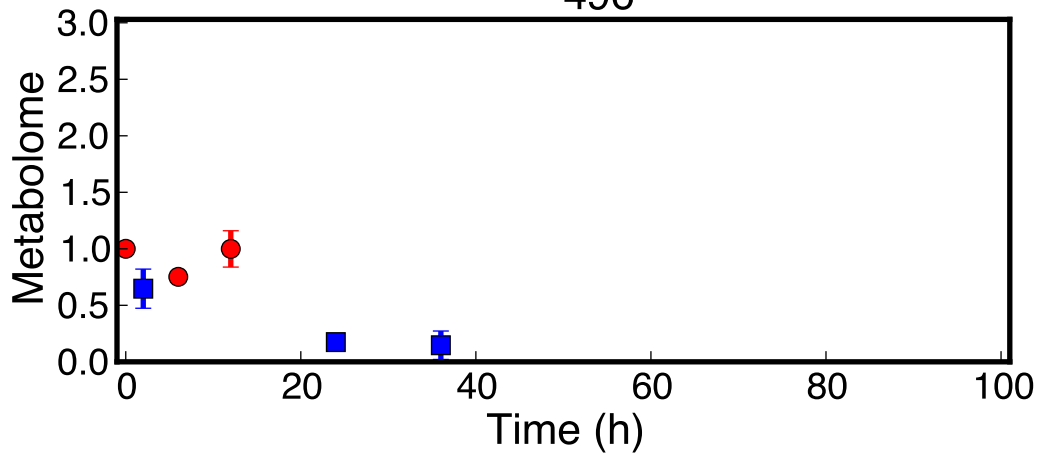



$X_{497}$

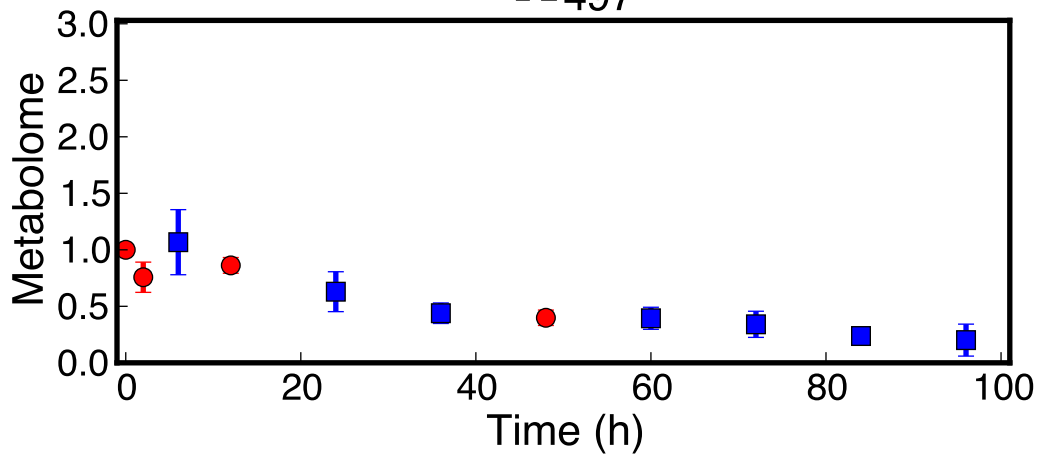

$X_{498}$

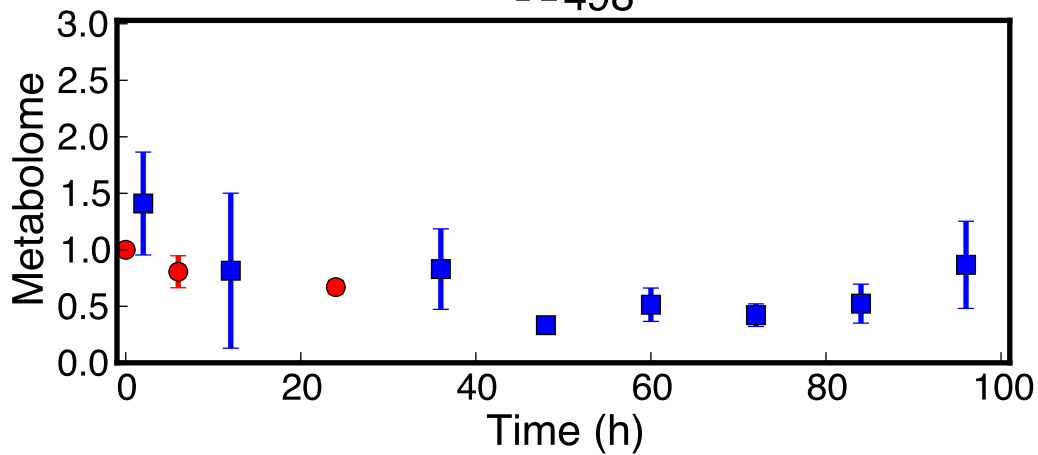

$X_{499}$

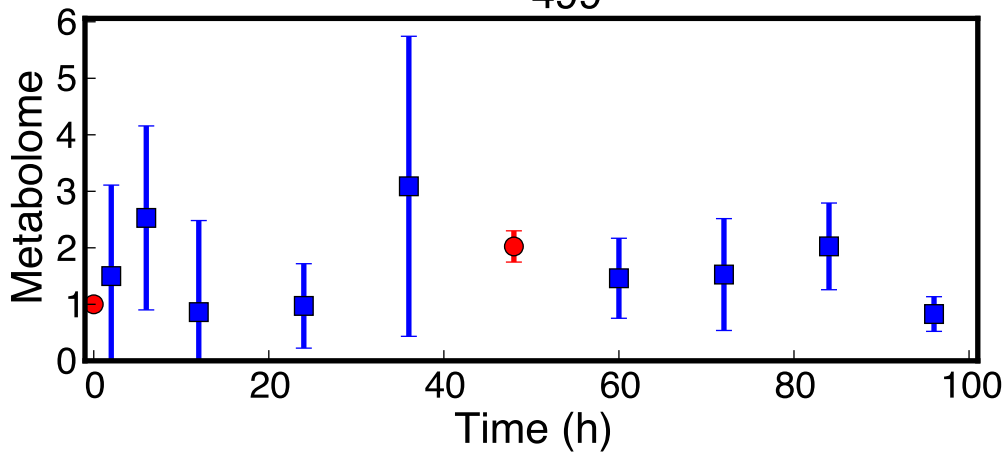

$X_{500}$

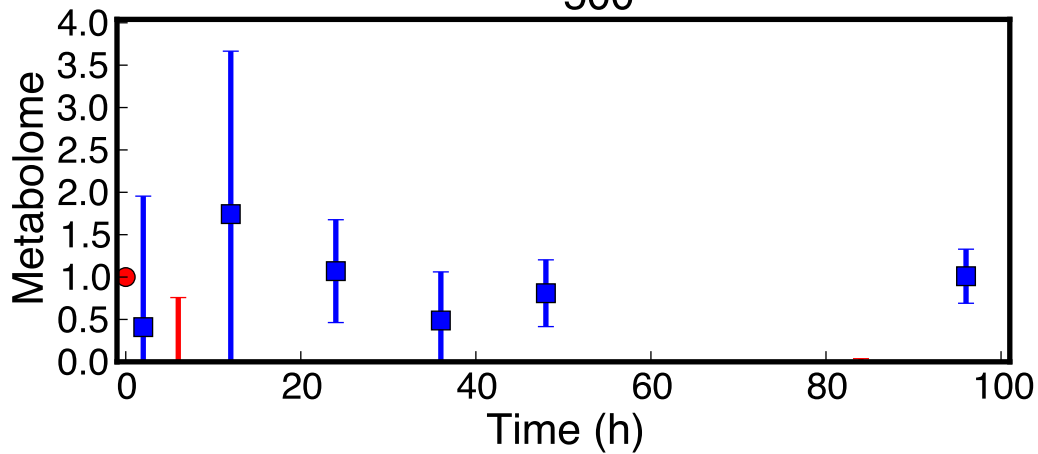

$X_{501}$

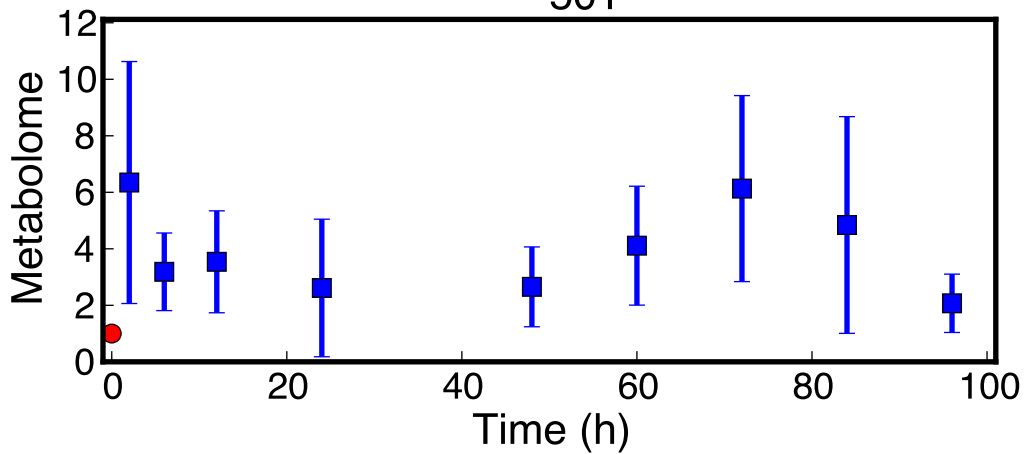

$X_{502}$

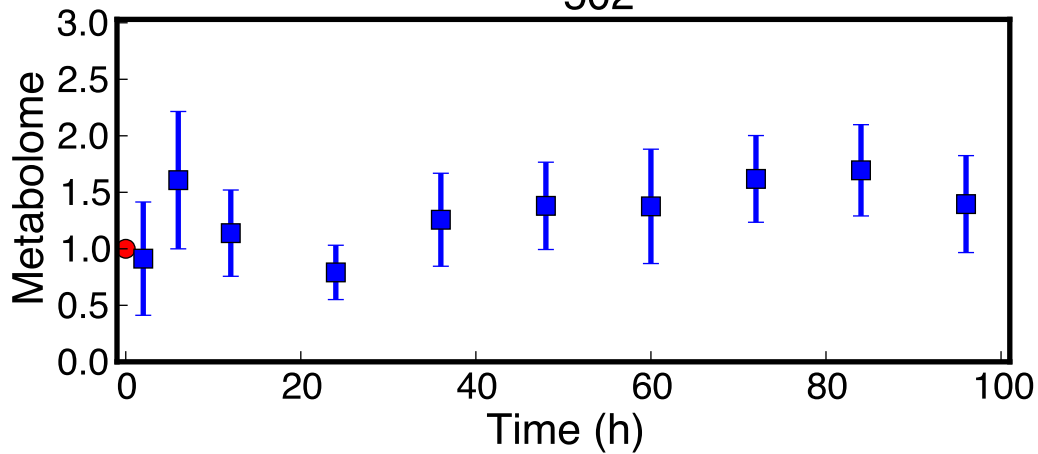

$X_{503}$

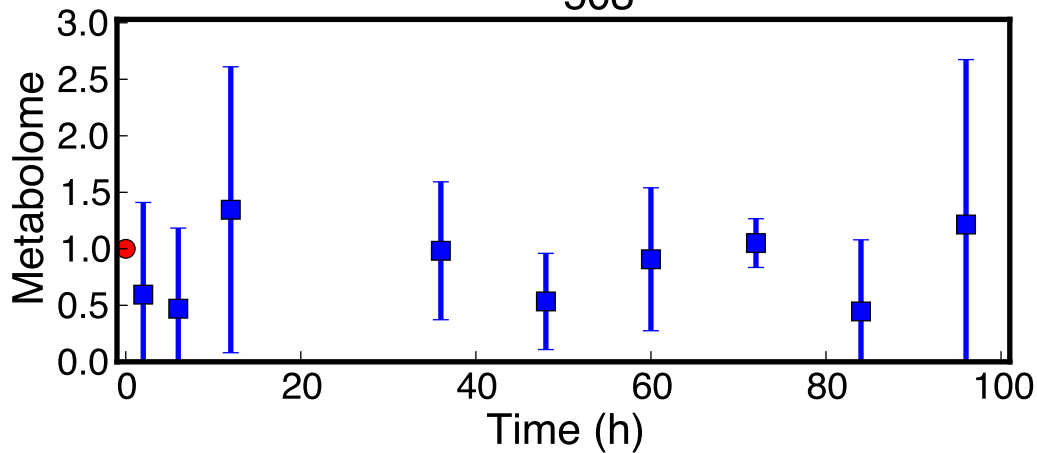

$X_{504}$

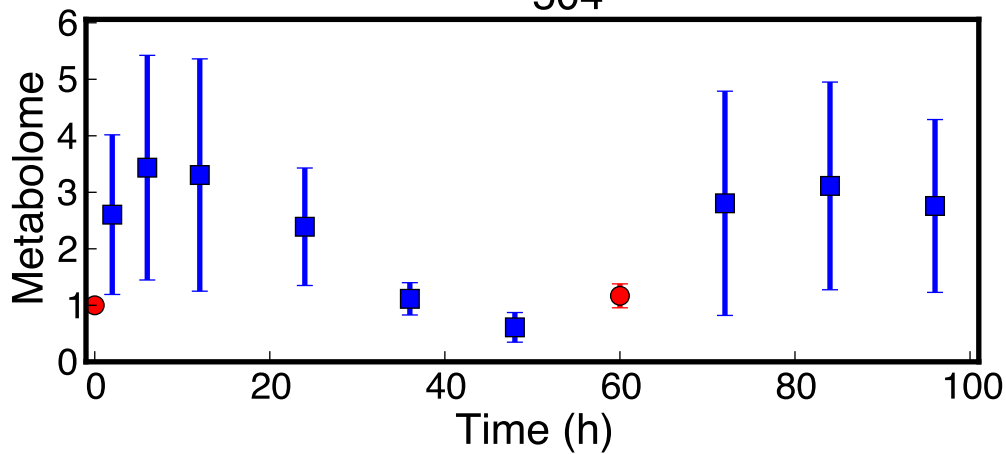



$X_{505}$

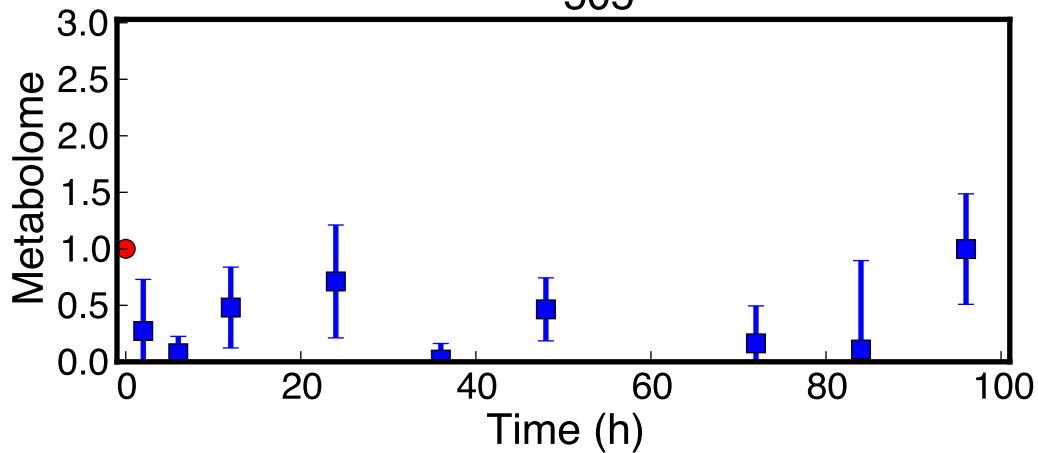

$X_{506}$

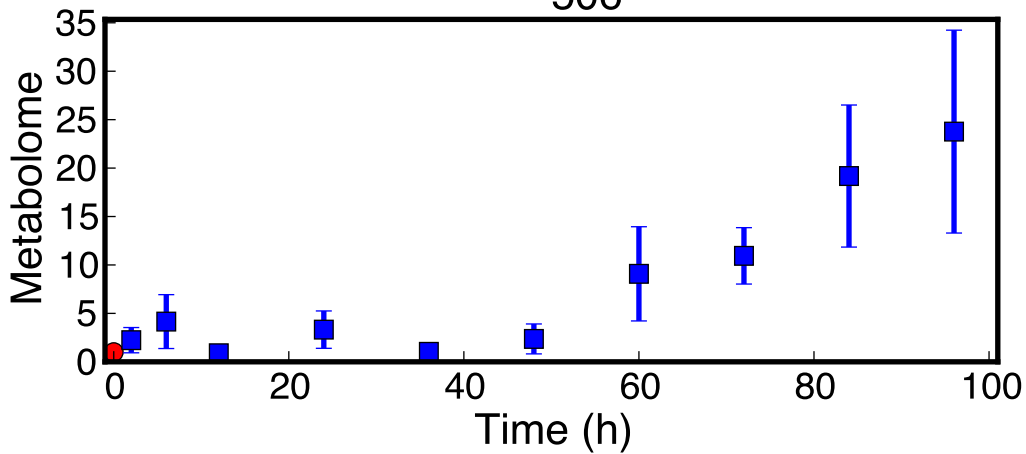

$X_{507}$

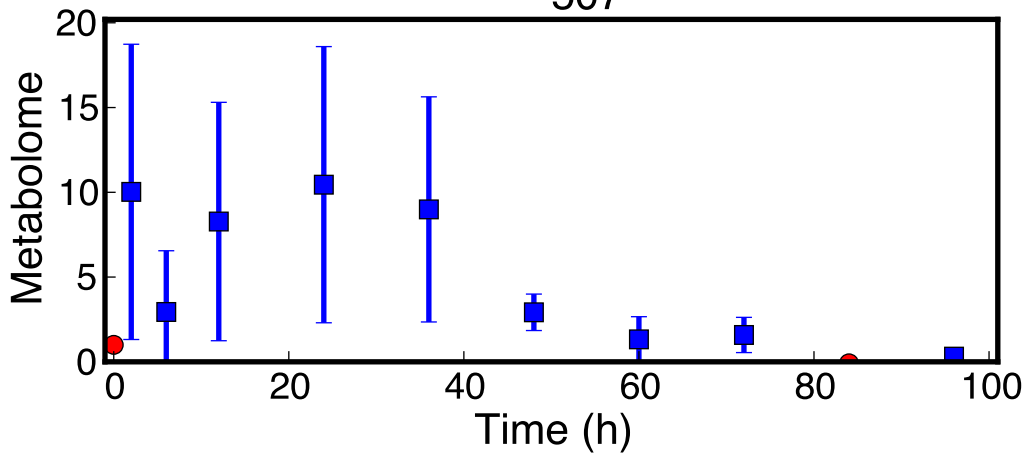

$X_{508}$

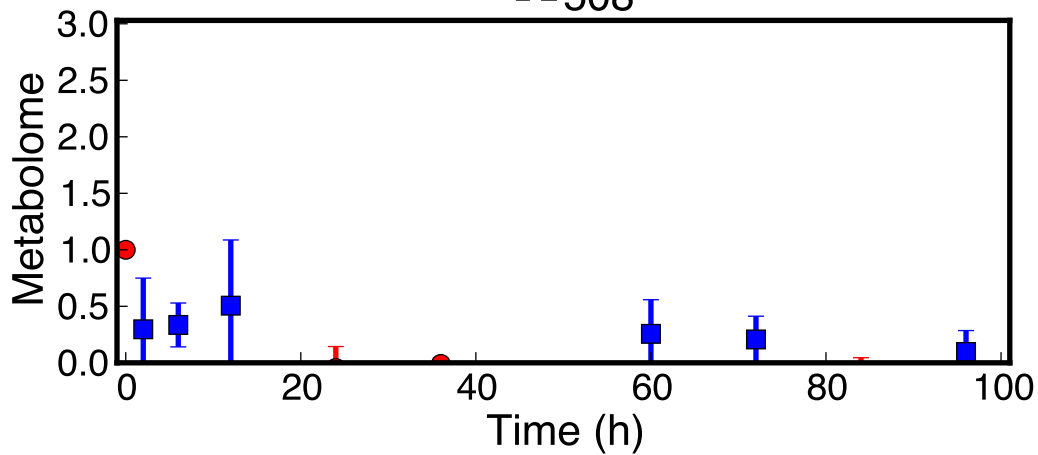

$X_{509}$

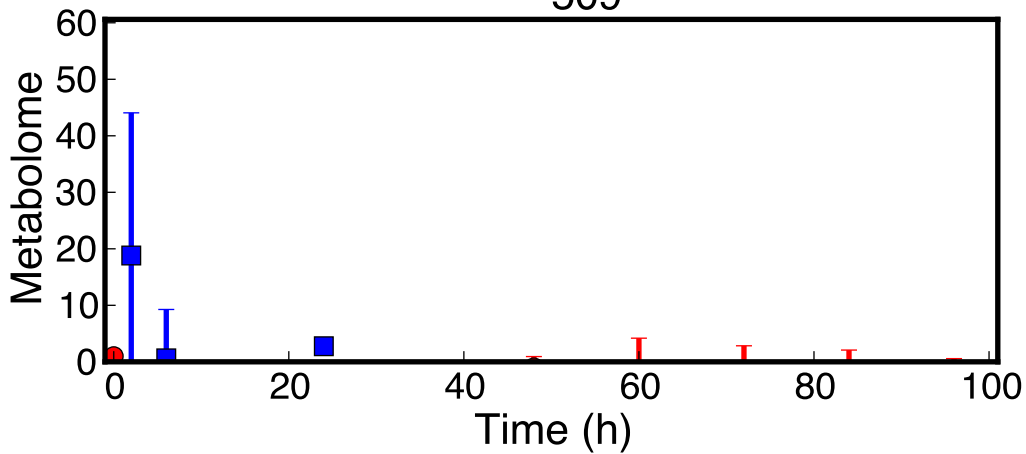

$X_{510}$

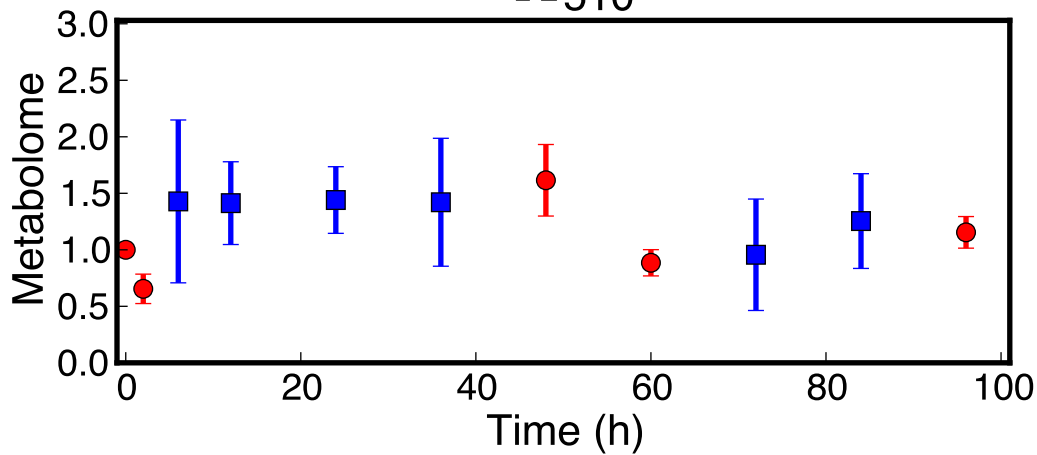

$X_{511}$

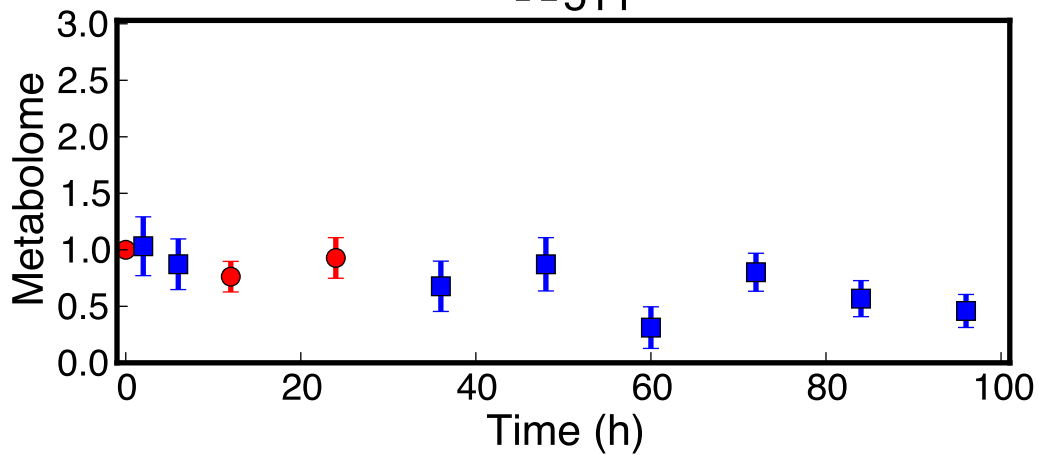

$X_{512}$

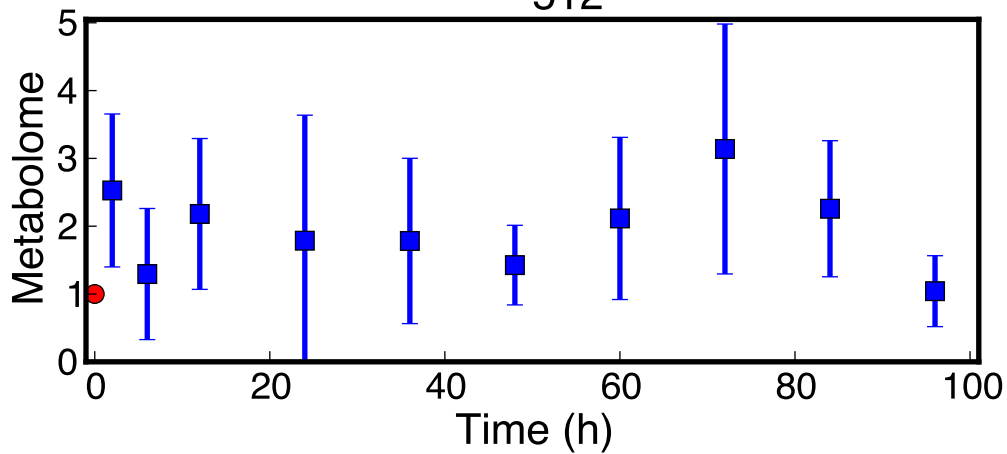



$X_{513}$

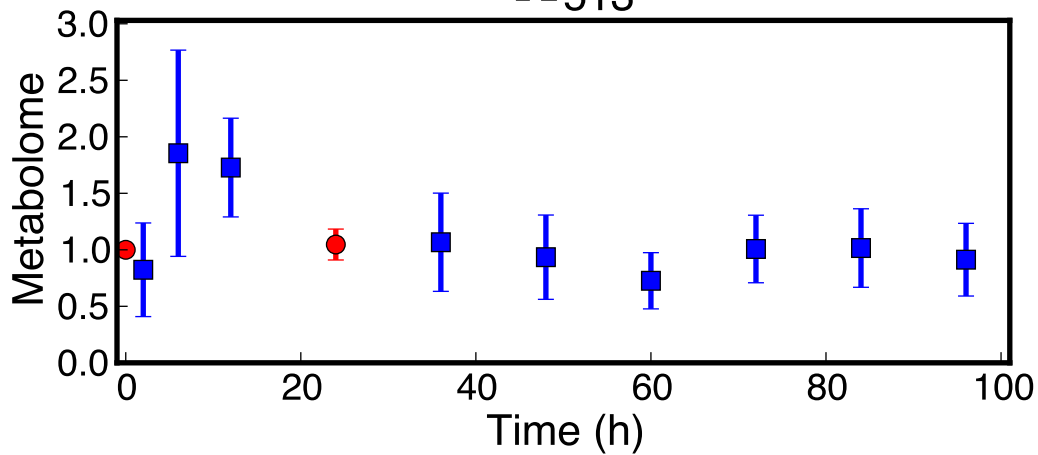

$X_{514}$

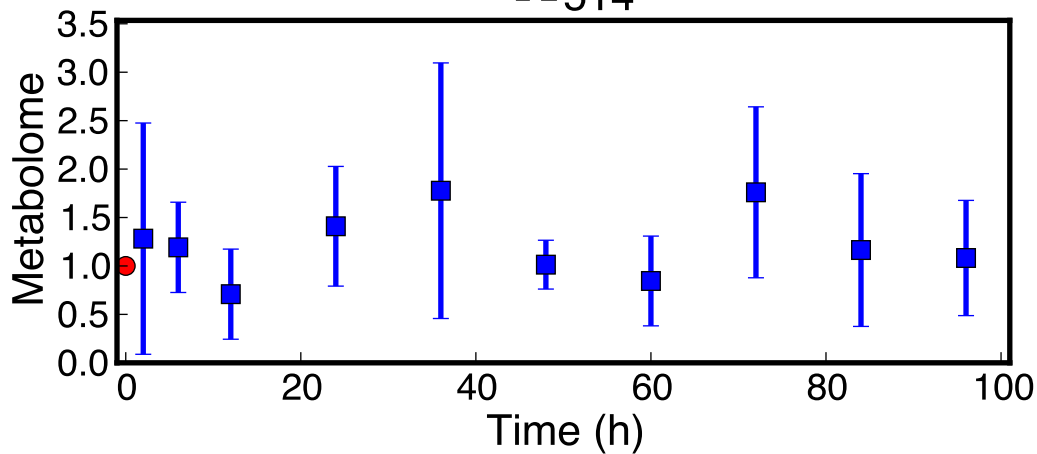

$X_{515}$

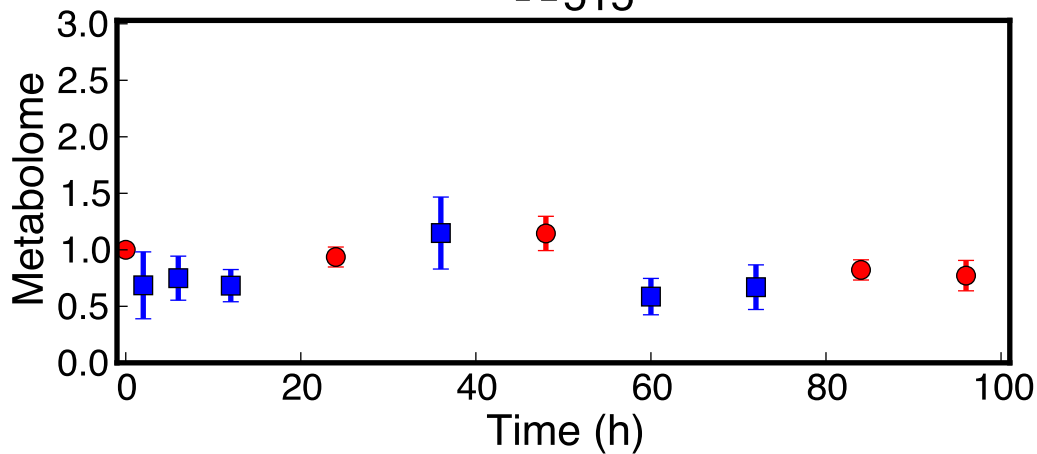

$X_{516}$

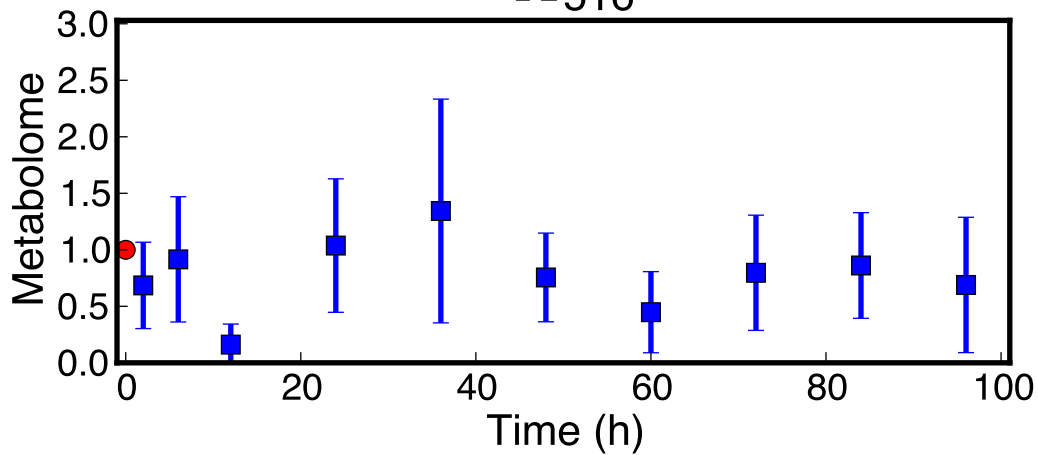

$X_{517}$

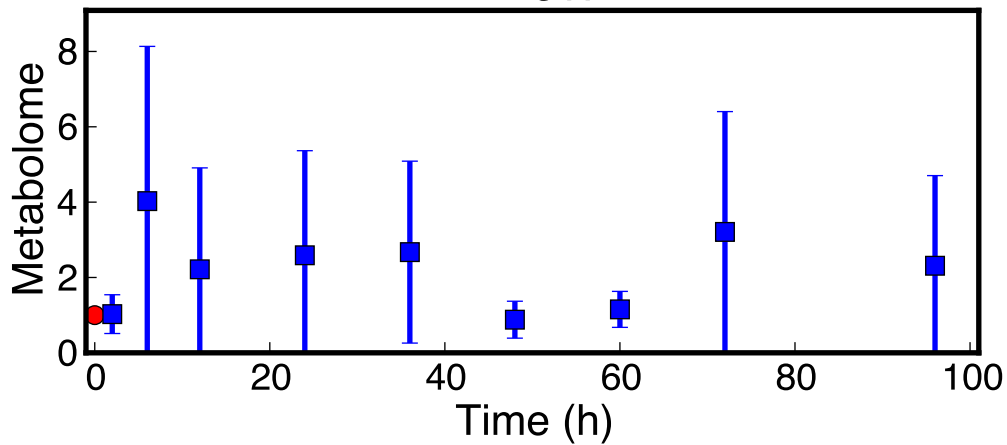

$X_{518}$

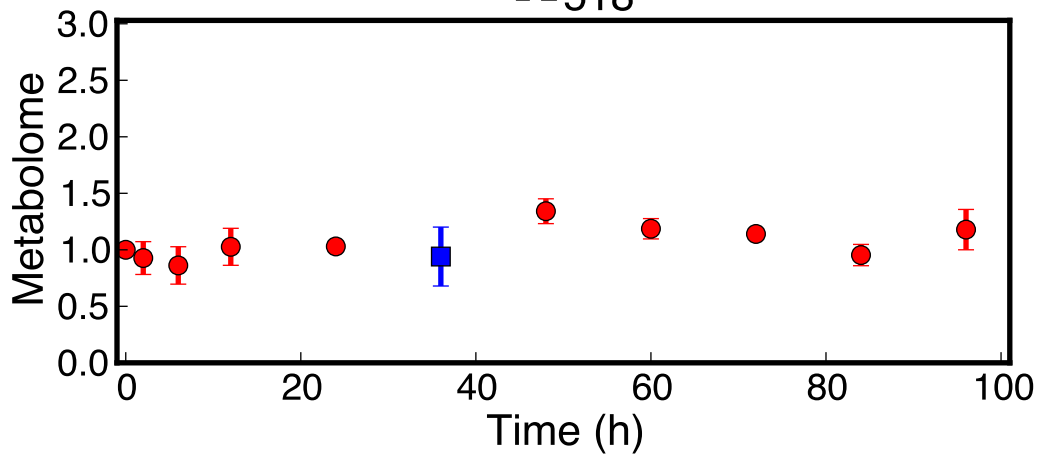

$X_{519}$

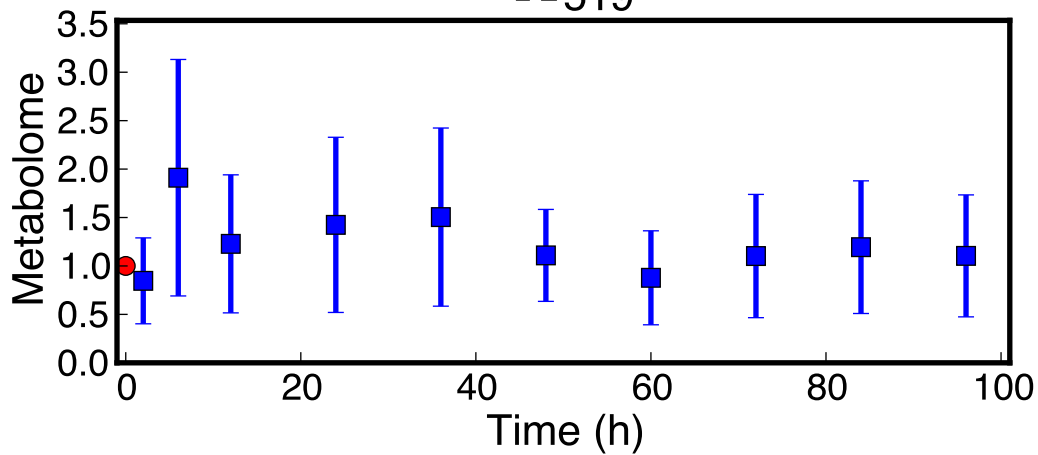

$X_{520}$

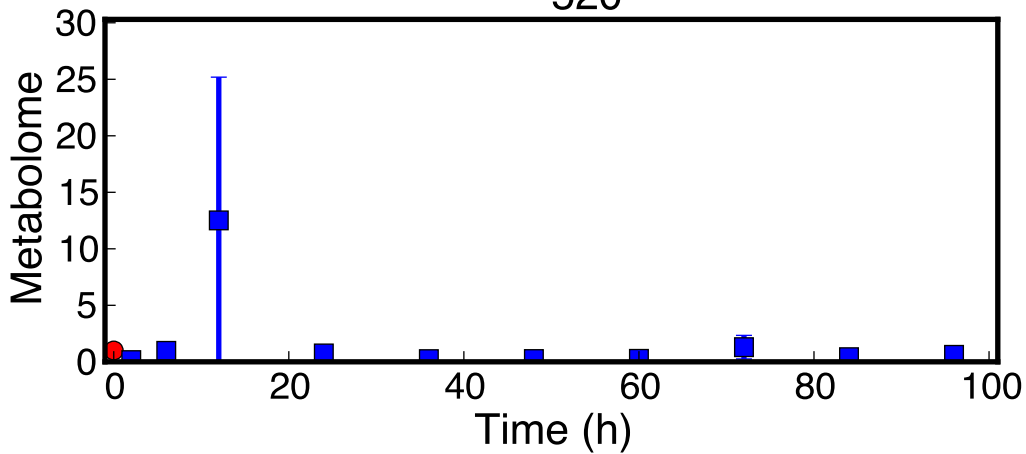



$X_{521}$

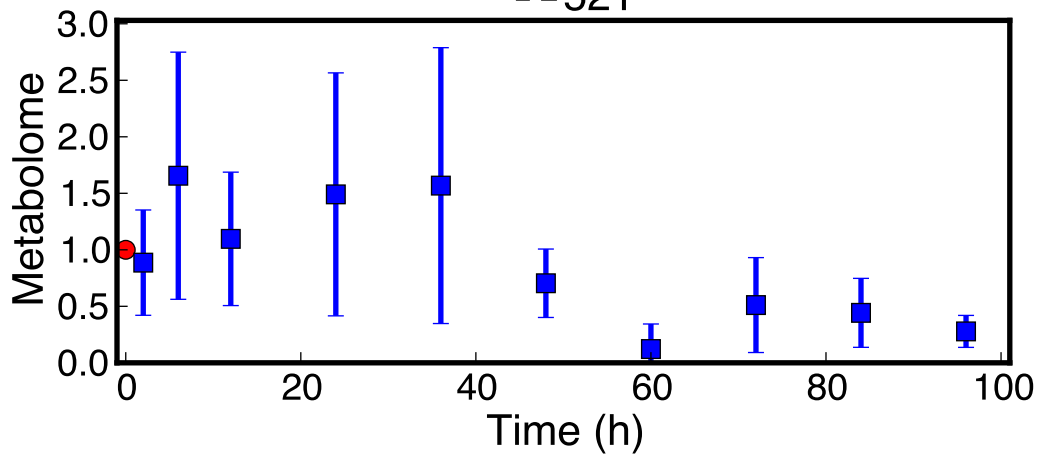

$X_{522}$

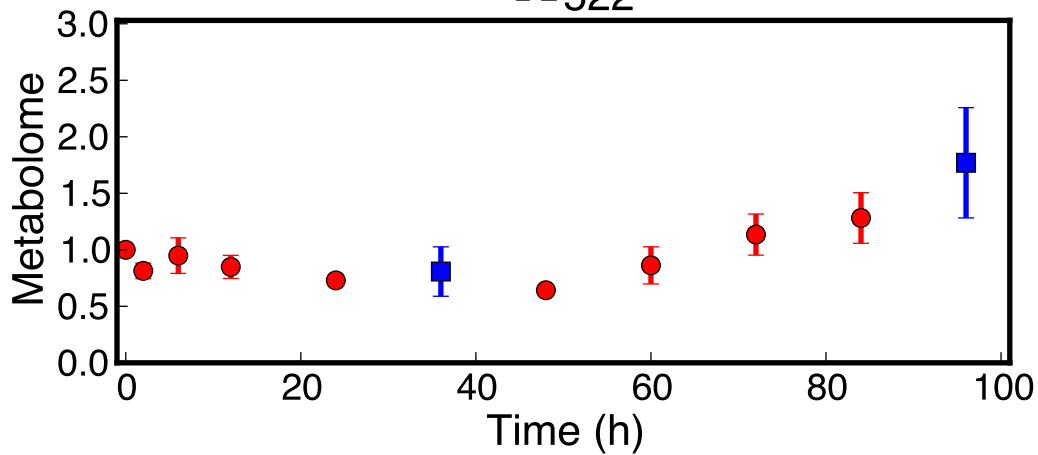

$X_{523}$

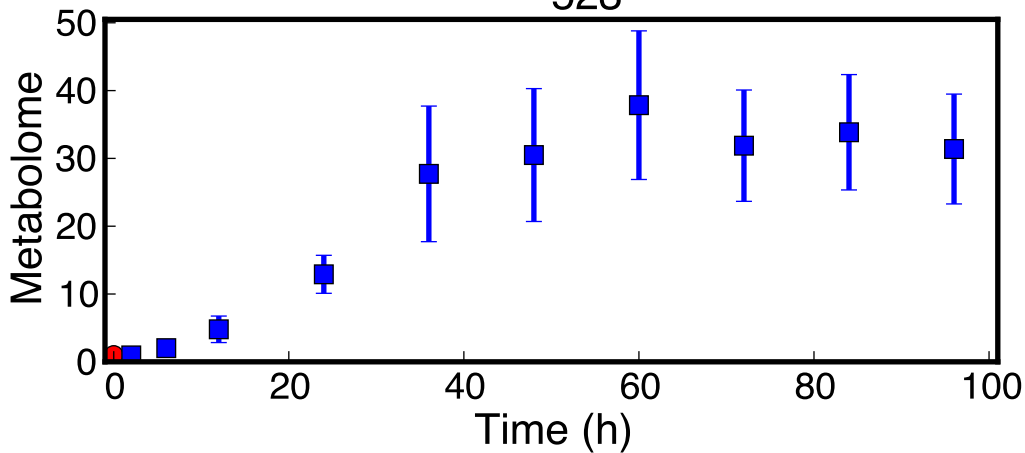

$X_{524}$

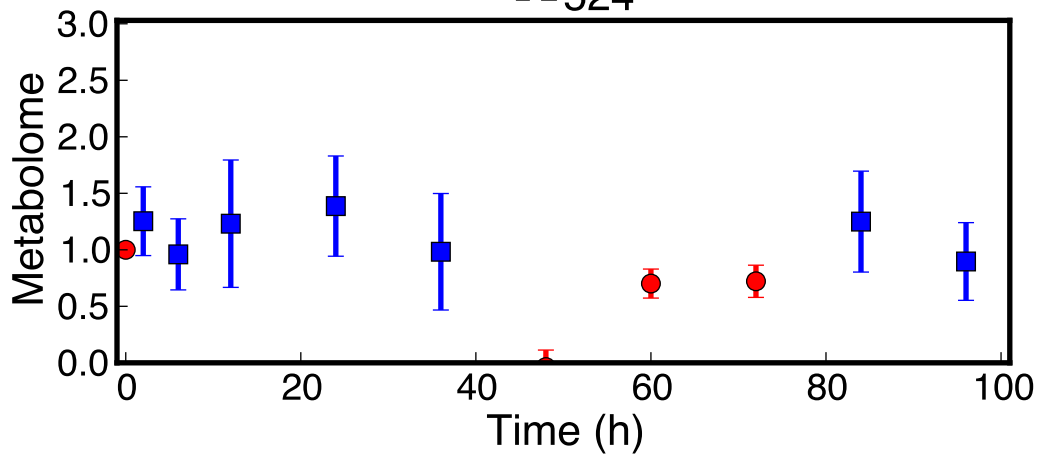

$X_{525}$

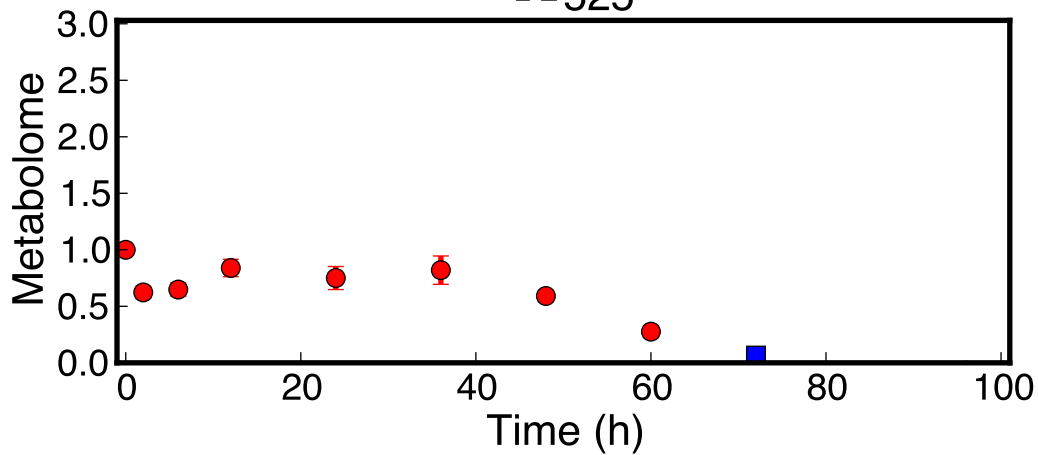

$X_{526}$

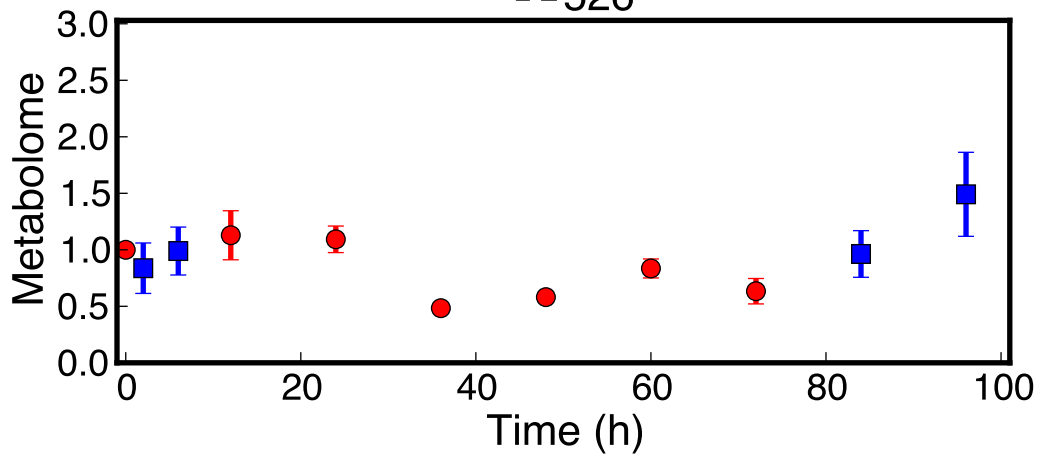

$X_{527}$

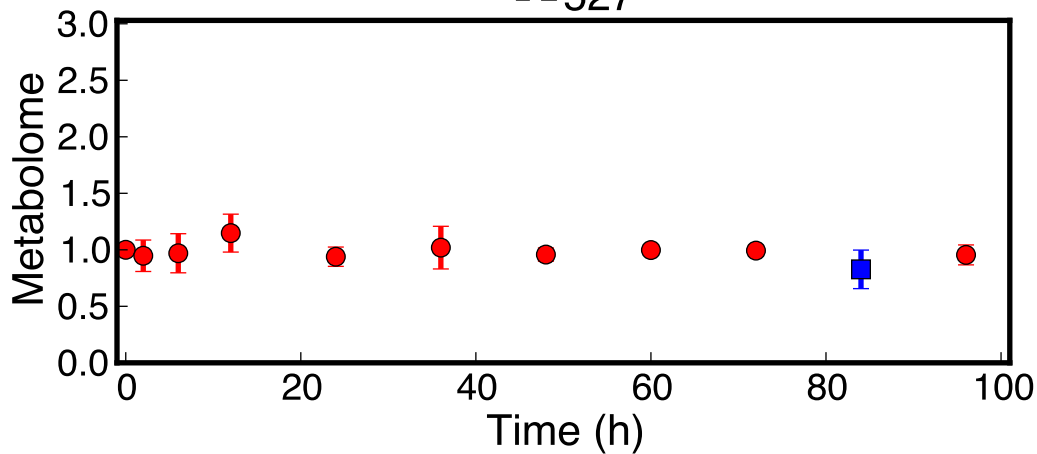

$X_{528}$

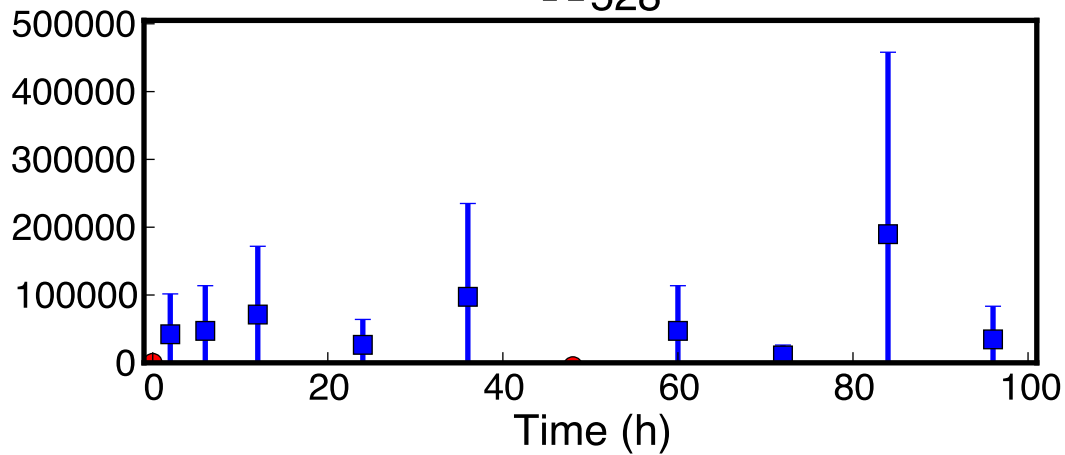



$X_{529}$

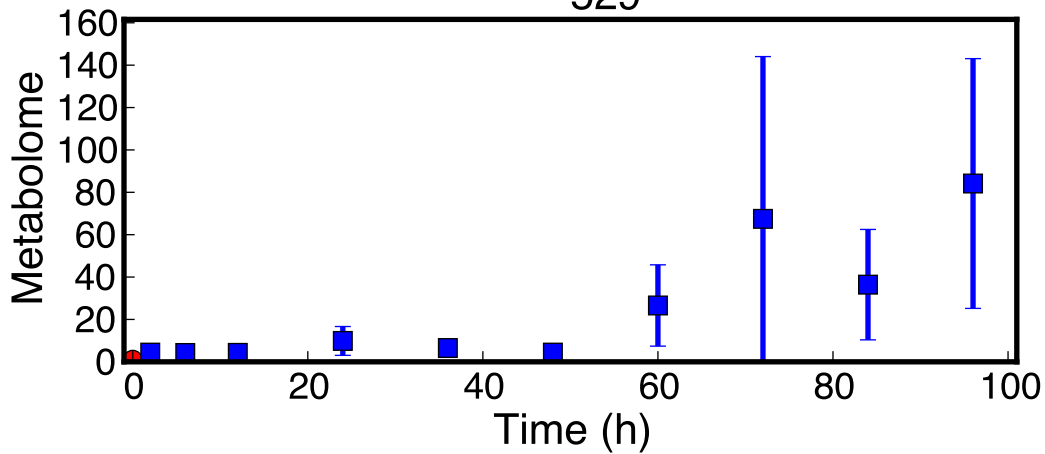

$X_{530}$

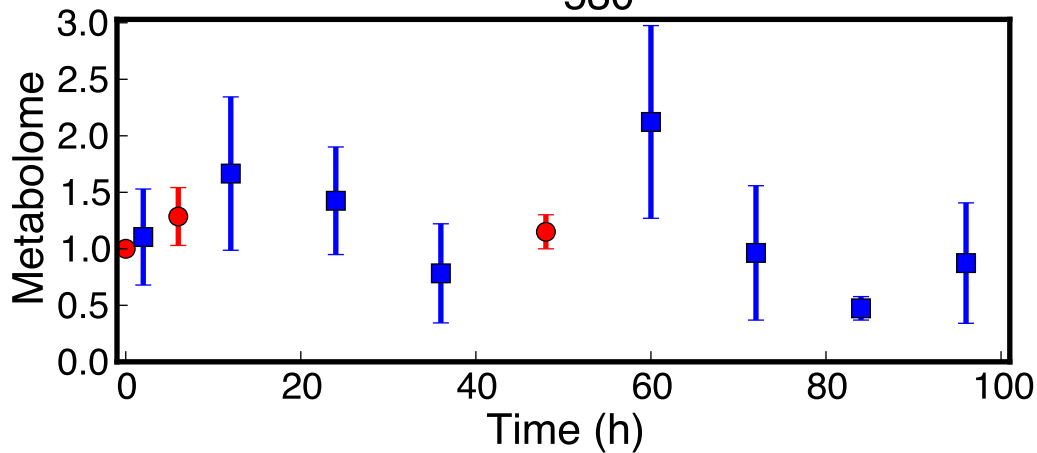

$X_{531}$

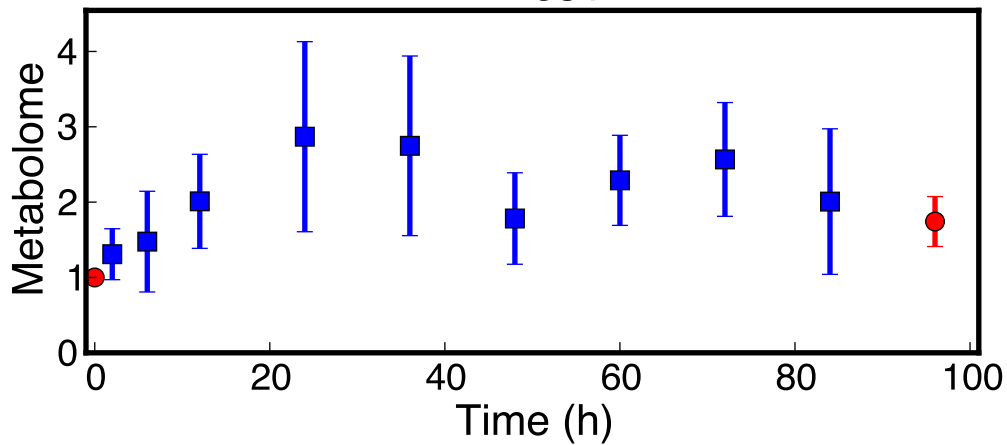

$X_{532}$

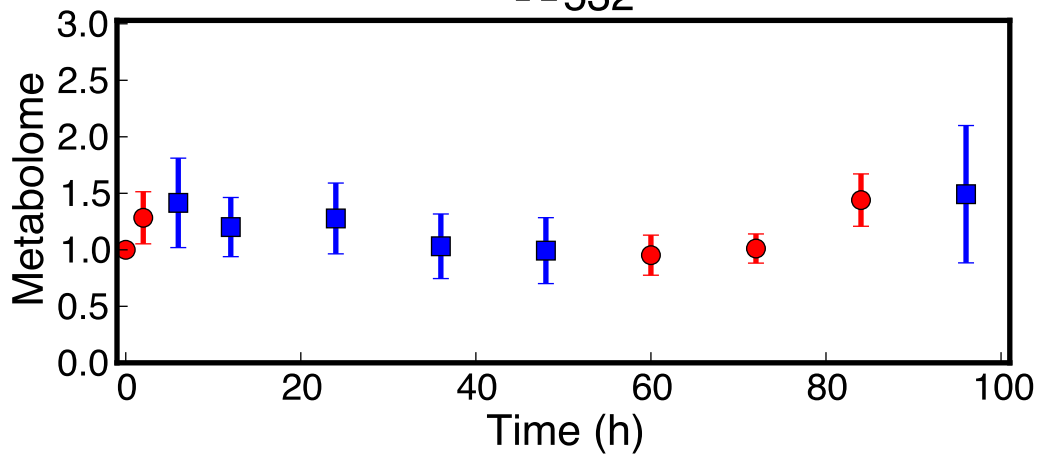

$X_{533}$

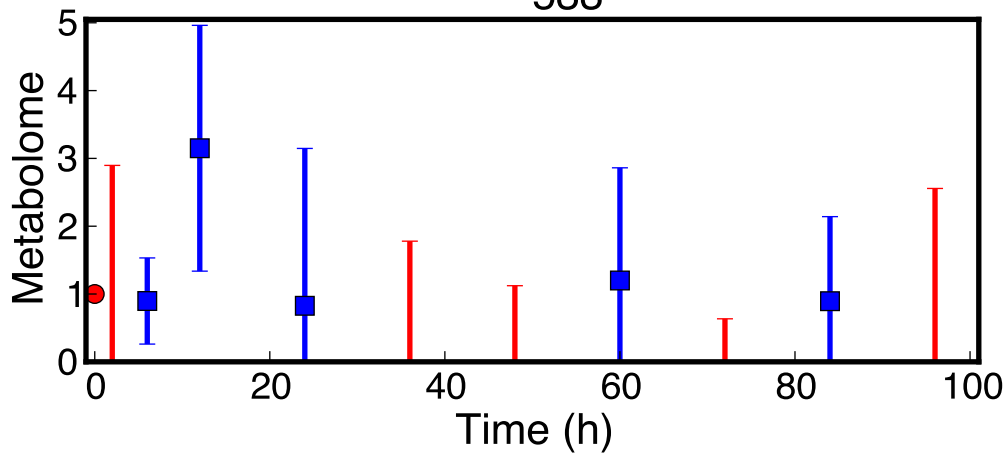

Supplement: 1752-0509-8-S5-S4-S3.pdf [file 1752-0509-8-S5-S4-S3.pdf]
