# Supplementary material for: A U-system approach for predicting metabolic behaviors and responses based on an alleged metabolic reaction network
Source: PubMed Central journal article supplement (PMC4305983; doi:10.1186/1752-0509-8-s5-s4), 2014-12-12
Supplement: 1752-0509-8-S5-S4-S2.pdf [file 1752-0509-8-S5-S4-S2.pdf]

| Worksheet           | Description                                                                                                                                                                                                                                                                                                                                                                                                                                                                                                                                                                                                                                                                                                                                                                                                      |
|---------------------|------------------------------------------------------------------------------------------------------------------------------------------------------------------------------------------------------------------------------------------------------------------------------------------------------------------------------------------------------------------------------------------------------------------------------------------------------------------------------------------------------------------------------------------------------------------------------------------------------------------------------------------------------------------------------------------------------------------------------------------------------------------------------------------------------------------|
| MetaboliteNames     | Numbers for metabolites in U-system model arbitrarily given. $X_i$ represent metabolites.                                                                                                                                                                                                                                                                                                                                                                                                                                                                                                                                                                                                                                                                                                                        |
| Fluxes              | Fluxes for U-system model. $V_j$ represent fluxes.                                                                                                                                                                                                                                                                                                                                                                                                                                                                                                                                                                                                                                                                                                                                                               |
| ODE                 | Ordinary differential equations (ODE) for the modified U-system model. $F_i$ represent ODE of metabolite $i$ . For the original model, $a_0, a_1, a_2, a_3$ are 1.0. For the Monte-Carlo simulations, the value of $a_3$ was varied while other parameters $a$ in the original model were kept to be 1.0. For the modified model, $a_0=0.05, a_1=0.01, a_2=0.1$ and $a_3=1.0$ .                                                                                                                                                                                                                                                                                                                                                                                                                                  |
| CorrelationAnalysis | Correlation coefficient and p-values for the comparisons of experimental data and U-system simulation. CorrMetabolomeSimulation and pValMetabolomeSimulation refer to correlation coefficients and p-values between relative concentrations from metabolome analysis and U-system concentrations. CorrAminoAcidSimulation and pValAminoAcidSimulation refer to correlation coefficients and p-values between relative concentrations from amino acid analysis and U-system concentrations. CorrMetabolomeAminoAcid and pValMetabolomeAminoAcid refer to correlation coefficients and p-values between relative concentrations from metabolome analysis and those from amino acid analysis. Columns for Simulation, AminoAcidAnalysis and MetabolomeAnalysis represents metabolic names for each analysis system. |

The correlation coefficients, testing for the significance of the correlation coefficients, and student's t continuous random variable based on a survival function were calculated for comparing model simulations with experimental data.

$$r = \frac{\sum xy - n\bar{x}\bar{y}}{\sqrt{(\sum x^2 - n\bar{x}^2)(\sum y^2 - n\bar{y}^2)}}$$

$$t = \frac{r}{\sqrt{\frac{1-r^2}{N-2}}}$$

$$F(t) = 1 - S(t)$$

$$p = P(T \geq t) = 1 - F(t)$$

where  $r$  represents correlation coefficient while  $x$  and  $y$  represent experimental and simulated data;  $t$  is testing for the significance of the correlation coefficients while  $p$  is p-value which is calculated using survival function,

|          |   |                                     |
|----------|---|-------------------------------------|
| $X_1$    | = | sucrose                             |
| $X_2$    | = | glucose-6P                          |
| $X_3$    | = | fructose-6P                         |
| $X_4$    | = | fructose-1,6-bis-P                  |
| $X_5$    | = | glyceraldehyde-3-P                  |
| $X_6$    | = | dihydroxyacetone-P                  |
| $X_7$    | = | 1,3-diPglycerate                    |
| $X_8$    | = | 3-phosphoglycerate                  |
| $X_9$    | = | 2-phosphoglycerate                  |
| $X_{10}$ | = | phosphoenolpyruvate                 |
| $X_{11}$ | = | pyruvate                            |
| $X_{12}$ | = | 2-acetolactate                      |
| $X_{13}$ | = | 2,3-dihydroxyisovalerate            |
| $X_{14}$ | = | 2-ketoisovalerate                   |
| $X_{15}$ | = | 2-isopropylmalate                   |
| $X_{16}$ | = | isopropylmaleate                    |
| $X_{17}$ | = | 3-isopropylmalate                   |
| $X_{18}$ | = | 2-isopropyl-3-oxosuccinate          |
| $X_{19}$ | = | 2-ketoisocaproate                   |
| $X_{20}$ | = | leucine                             |
| $X_{21}$ | = | 3-phosphohydroxypyruvate            |
| $X_{22}$ | = | 3-phosphoserine                     |
| $X_{23}$ | = | L-serine                            |
| $X_{24}$ | = | D-serine                            |
| $X_{25}$ | = | glycine                             |
| $X_{26}$ | = | threonine                           |
| $X_{27}$ | = | 2-oxobutanoate                      |
| $X_{28}$ | = | 2-aceto-2-hydroxybutyrate           |
| $X_{29}$ | = | 2,3-dihydroxy-3-methylvalerate      |
| $X_{30}$ | = | 2-keto-3-methylvalerate             |
| $X_{31}$ | = | isoleucine                          |
| $X_{32}$ | = | S-2-methylbutyryl-CoA               |
| $X_{33}$ | = | tigloylCoA                          |
| $X_{34}$ | = | 2-methyl-3-hydroxybutyryl-CoA       |
| $X_{35}$ | = | 2-methylacetoacetyl-CoA             |
| $X_{36}$ | = | acetylCoA                           |
| $X_{37}$ | = | glutamate                           |
| $X_{38}$ | = | N-acetyl-L-glutamate                |
| $X_{39}$ | = | N-acetylglutamyl-P                  |
| $X_{40}$ | = | N-acetyl-L-glutamate-5-semialdehyde |
| $X_{41}$ | = | N-acetyl-L-ornithine                |
| $X_{42}$ | = | ornithine                           |
| $X_{43}$ | = | carbamoyl-P                         |
| $X_{44}$ | = | glutamine                           |
| $X_{45}$ | = | citrulline                          |
| $X_{46}$ | = | argininosuccinate                   |
| $X_{47}$ | = | arginine                            |
| $X_{48}$ | = | glutamate-gamma-semialdehyde        |
| $X_{49}$ | = | S-1-pyrroline-5-carboxylate         |

|          |   |                                  |
|----------|---|----------------------------------|
| $X_{50}$ | = | proline                          |
| $X_{51}$ | = | O-acetyl-L-serine                |
| $X_{52}$ | = | 5-phosphoribosyl-1-pyrophosphate |
| $X_{53}$ | = | phosphoribosylATP                |
| $X_{54}$ | = | phosphoribosylAMP                |
| $X_{55}$ | = | phosphoribosylformiminoAICARP    |
| $X_{56}$ | = | phosphoribulosylformiminoAICARP  |
| $X_{57}$ | = | AICAR                            |
| $X_{58}$ | = | D-erythroimidazoleglycerol-P     |
| $X_{59}$ | = | imidazoleacetol-P                |
| $X_{60}$ | = | histidinolP                      |
| $X_{61}$ | = | histidinol                       |
| $X_{62}$ | = | histidinal                       |
| $X_{63}$ | = | histidine                        |
| $X_{64}$ | = | citrate                          |
| $X_{65}$ | = | cisaconitate                     |
| $X_{66}$ | = | isocitrate                       |
| $X_{67}$ | = | ketoglutarate                    |
| $X_{68}$ | = | succinyl-CoA                     |
| $X_{69}$ | = | succinate                        |
| $X_{70}$ | = | fumarate                         |
| $X_{71}$ | = | malate                           |
| $X_{72}$ | = | oxaloacetate                     |
| $X_{73}$ | = | alanine                          |
| $X_{74}$ | = | cysteine                         |
| $X_{75}$ | = | 4-aminobutyrate                  |
| $X_{76}$ | = | succinatesemialdehyde            |
| $X_{77}$ | = | asparagine                       |
| $X_{78}$ | = | aspartate                        |
| $X_{79}$ | = | aspartate-4P                     |
| $X_{80}$ | = | aspartatesemialdehyde            |
| $X_{81}$ | = | homoserine                       |
| $X_{82}$ | = | O-phospho-L-homoserine           |
| $X_{83}$ | = | cystathionine                    |
| $X_{84}$ | = | homocysteine                     |
| $X_{85}$ | = | methionine                       |
| $X_{86}$ | = | S-adenosyl-L-methionine          |
| $X_{87}$ | = | S-adenosyl-L-homocysteine        |
| $X_{88}$ | = | adenosine                        |
| $X_{89}$ | = | L-2,3-dihydrodipicolinate        |
| $X_{90}$ | = | tetrahydrodipicolinate           |
| $X_{91}$ | = | L,L-diamionopimelate             |
| $X_{92}$ | = | mesodiaminopimelate              |
| $X_{93}$ | = | lysine                           |
| $X_{94}$ | = | S-methyl-5-thioadenosine         |
| $X_{95}$ | = | 5-methylthioribose               |
| $X_{96}$ | = | 5-methylthioribose-1P            |
| $X_{97}$ | = | 5-methylthioribulose-1P          |
| $X_{98}$ | = | 5-methylthio-2,3-dioxopentyl-P   |

|           |   |                                                |
|-----------|---|------------------------------------------------|
| $X_{99}$  | = | 2-hydroxy-3-keto-5-methylthio-1-phosphopentene |
| $X_{100}$ | = | 1,2-dihydroxy-3-keto-5-methylthiopentene       |
| $X_{101}$ | = | 2-oxo-4-methylthiobutanoate                    |
| $X_{102}$ | = | 3-deoxyDarabinoheptulosonate-7P                |
| $X_{103}$ | = | 3-dehydroquinate                               |
| $X_{104}$ | = | 3-dehydroshikimate                             |
| $X_{105}$ | = | shikimate                                      |
| $X_{106}$ | = | shikimate-3P                                   |
| $X_{107}$ | = | 5-enolpyruvylshikimate-3P                      |
| $X_{108}$ | = | prephenate                                     |
| $X_{109}$ | = | arogenate                                      |
| $X_{110}$ | = | phenylalanine                                  |
| $X_{111}$ | = | phenylpyruvate                                 |
| $X_{112}$ | = | phenylacetaldehyde                             |
| $X_{113}$ | = | tyrosine                                       |
| $X_{114}$ | = | phydroxyphenylpyruvate                         |
| $X_{115}$ | = | homogentisate                                  |
| $X_{116}$ | = | maleylacetoacetate                             |
| $X_{117}$ | = | 4-fumarylacetoacetate                          |
| $X_{118}$ | = | anthranilate                                   |
| $X_{119}$ | = | N-5-phosphoribosylanthranilate                 |
| $X_{120}$ | = | 1-O-carboxyphenylamino-1-deoxyribulose-5P      |
| $X_{121}$ | = | indole3glycerolP                               |
| $X_{122}$ | = | indole                                         |
| $X_{123}$ | = | tryptophan                                     |
| $X_{124}$ | = | valine                                         |
| $X_{125}$ | = | glyoxylate                                     |
| $X_{126}$ | = | SmethylLmethionine                             |
| $X_{127}$ | = | chorismate                                     |
| $X_{128}$ | = | glutamylcysteine                               |
| $X_{129}$ | = | glutathione                                    |
| $X_{130}$ | = | 2-methylmalate                                 |
| $X_{131}$ | = | methylmaleate                                  |
| $X_{132}$ | = | 3-methylmalate                                 |
| $X_{133}$ | = | hydroxylysine                                  |
| $X_{134}$ | = | acetylhydroxylysine                            |
| $X_{135}$ | = | D-lysine                                       |
| $X_{136}$ | = | diaminohexanoate                               |
| $X_{137}$ | = | N-acetyllysine                                 |
| $X_{138}$ | = | acetamidooxohexanoate                          |
| $X_{139}$ | = | aminooxohexanoate                              |
| $X_{140}$ | = | piperideine-2-carboxylate                      |
| $X_{141}$ | = | pipecolate                                     |
| $X_{142}$ | = | piperideine-6-carboxylate                      |
| $X_{143}$ | = | aminoadipatesemialdehyde                       |
| $X_{144}$ | = | saccharopine                                   |
| $X_{145}$ | = | cadaverine                                     |
| $X_{146}$ | = | piperideine                                    |
| $X_{147}$ | = | aminopentanamide                               |

|           |   |                                             |
|-----------|---|---------------------------------------------|
| $X_{148}$ | = | aminopentanoate                             |
| $X_{149}$ | = | acetyllysine                                |
| $X_{150}$ | = | acetamidopentanoate                         |
| $X_{151}$ | = | glutaratesemialdehyde                       |
| $X_{152}$ | = | glutarate                                   |
| $X_{153}$ | = | aminoadipate                                |
| $X_{154}$ | = | oxoadipate                                  |
| $X_{155}$ | = | glutaryl dihydroliipoamide                  |
| $X_{156}$ | = | glutaryl-CoA                                |
| $X_{157}$ | = | crotonoyl-CoA                               |
| $X_{158}$ | = | hydroxybutanoyl-CoA                         |
| $X_{159}$ | = | acetoacetyl-CoA                             |
| $X_{160}$ | = | 2,2-methylthioethylmalate                   |
| $X_{161}$ | = | 3,2-methylthioethylmalate                   |
| $X_{162}$ | = | 2-oxo-5-methylthiopentanoic acid            |
| $X_{163}$ | = | 2,3-methylthiopropylmalate                  |
| $X_{164}$ | = | 3,3-methylthiopropylmalate                  |
| $X_{165}$ | = | 2-oxo-6-methylthiohexanoate                 |
| $X_{166}$ | = | 2,4-methylthiobutylmalate                   |
| $X_{167}$ | = | 3,4-methylthiobutylmalate                   |
| $X_{168}$ | = | 2-oxo-7-methylthioheptanoate                |
| $X_{169}$ | = | 2,5-methylthiopentylmalate                  |
| $X_{170}$ | = | 3,5-methylthiobutylmalate                   |
| $X_{171}$ | = | 2-oxo-8-methyloctanoate                     |
| $X_{172}$ | = | 2,6-methylthiohexylmalate                   |
| $X_{173}$ | = | 3,6-methylthiohexylmalate                   |
| $X_{174}$ | = | 2-oxo-9-methylononanoate                    |
| $X_{175}$ | = | 2,7-methylthioheptylmalate                  |
| $X_{176}$ | = | 3,7-methylthioheptylmalate                  |
| $X_{177}$ | = | 2-oxo-1,0-methylthiodecanoate               |
| $X_{178}$ | = | homomethionine                              |
| $X_{179}$ | = | methylthiobutanaldoxime                     |
| $X_{180}$ | = | methylthiobutanonitrileoxide                |
| $X_{181}$ | = | methylthiobutylhydroximoylglutathione       |
| $X_{182}$ | = | methylthiobutylhydroximoylcysteinylglycine  |
| $X_{183}$ | = | methylthiobutylhydroximate                  |
| $X_{184}$ | = | methylthiopropyl desulfoglucosinolate       |
| $X_{185}$ | = | methylthiopropylglucosinolate               |
| $X_{186}$ | = | methylsulfinylpropylglucosinolate           |
| $X_{187}$ | = | propenylglucosinolate                       |
| $X_{188}$ | = | hydroxypropylglucosinolate                  |
| $X_{189}$ | = | benzoyloxypropylglucosinolate               |
| $X_{190}$ | = | sinapoyloxypropylglucosinolate              |
| $X_{191}$ | = | dihomomethionine                            |
| $X_{192}$ | = | methylthiopentanaloxime                     |
| $X_{193}$ | = | methylthiopentanonitrileoxide               |
| $X_{194}$ | = | methylthiopentylhydroximoylglutathione      |
| $X_{195}$ | = | methylthiopentylhydroximoylcysteinylglycine |
| $X_{196}$ | = | methylthiopentylhydroximate                 |

|           |   |                                             |
|-----------|---|---------------------------------------------|
| $X_{197}$ | = | methylthiobutylsulfoglucosinolate           |
| $X_{198}$ | = | methylthiobutylglucosinolate                |
| $X_{199}$ | = | methylsulfinylbutylglucosinolate            |
| $X_{200}$ | = | butenylglucosinolate                        |
| $X_{201}$ | = | hydroxy-3-butenylglucosinolate              |
| $X_{202}$ | = | benzoyloxy-3-butenylglucosinolate           |
| $X_{203}$ | = | sinapoyloxy-3-butenylglucosinolate          |
| $X_{204}$ | = | hydroxybutylglucosinolate                   |
| $X_{205}$ | = | benzoyloxybutylglucosinolate                |
| $X_{206}$ | = | sinapoyloxybutylglucosinolate               |
| $X_{207}$ | = | trihomomethionine                           |
| $X_{208}$ | = | methylthiohexanaldoxime                     |
| $X_{209}$ | = | methylthiohexanonitrileoxide                |
| $X_{210}$ | = | methylthiohexylhydroximoylglutathione       |
| $X_{211}$ | = | methylthiohexylhydroximoylcysteinylglycine  |
| $X_{212}$ | = | methylthiohexylhydroximate                  |
| $X_{213}$ | = | methylthiopentylsulfoglucosinolate          |
| $X_{214}$ | = | methylthiopentylglucosinolate               |
| $X_{215}$ | = | methylsulfinylpentylglucosinolate           |
| $X_{216}$ | = | pentenylglucosinolate                       |
| $X_{217}$ | = | tetrahomomethionine                         |
| $X_{218}$ | = | methylthioheptanaldoxime                    |
| $X_{219}$ | = | methylthioheptanonitrileoxide               |
| $X_{220}$ | = | methylthioheptylhydroximoylglutathione      |
| $X_{221}$ | = | methylthioheptylhydroximoylcysteinylglycine |
| $X_{222}$ | = | methylthioheptylhydroximate                 |
| $X_{223}$ | = | methylthiohexylsulfoglucosinolate           |
| $X_{224}$ | = | methylthiohexylglucosinolate                |
| $X_{225}$ | = | methylsulfinylhexylglucosinolate            |
| $X_{226}$ | = | pentahomomethionine                         |
| $X_{227}$ | = | methylthiooctanaldoxime                     |
| $X_{228}$ | = | methylthiooctanonitrileoxide                |
| $X_{229}$ | = | methylthiooctylhydroximoylglutathione       |
| $X_{230}$ | = | methylthiooctylhydroximoylcysteinylglycine  |
| $X_{231}$ | = | methylthiooctylhydroximate                  |
| $X_{232}$ | = | methylthioheptylsulfoglucosinolate          |
| $X_{233}$ | = | methylthioheptylglucosinolate               |
| $X_{234}$ | = | methylsulfinylheptylglucosinolate           |
| $X_{235}$ | = | hexahomomethionine                          |
| $X_{236}$ | = | methylthiononanaldoxime                     |
| $X_{237}$ | = | methylthiononanitrileoxide                  |
| $X_{238}$ | = | methylthiononylhydroximoylglutathione       |
| $X_{239}$ | = | methylthiononylhydroximoylcysteinylglycine  |
| $X_{240}$ | = | methylthiononylhydroximate                  |
| $X_{241}$ | = | methylthiooctylsulfoglucosinolate           |
| $X_{242}$ | = | methylthiooctylglucosinolate                |
| $X_{243}$ | = | methylsulfinyloctylglucosinolate            |
| $X_{244}$ | = | phenylacetaldoxime                          |
| $X_{245}$ | = | phenylacetoneitrileoxide                    |

|                         |   |                                                          |
|-------------------------|---|----------------------------------------------------------|
| <i>X</i> <sub>246</sub> | = | phenylacetohydroximoylglutathione                        |
| <i>X</i> <sub>247</sub> | = | phenylacetohydroximoylcysteinylglycine                   |
| <i>X</i> <sub>248</sub> | = | phenylacetothiohydroximate                               |
| <i>X</i> <sub>249</sub> | = | benzyldesulfoglucosinolate                               |
| <i>X</i> <sub>250</sub> | = | benzylglucosinolate                                      |
| <i>X</i> <sub>251</sub> | = | indole-3-acetaldoxime                                    |
| <i>X</i> <sub>252</sub> | = | indole-3-acetonitrileoxide                               |
| <i>X</i> <sub>253</sub> | = | indole-3-acetohydroximoylglutathione                     |
| <i>X</i> <sub>254</sub> | = | indole-3-acetohydroximoylcysteinylglycine                |
| <i>X</i> <sub>255</sub> | = | indolylmethylthiohydroximate                             |
| <i>X</i> <sub>256</sub> | = | indolylmethylsulfoglucosinolate                          |
| <i>X</i> <sub>257</sub> | = | indol-3-ylmethylglucosinolate                            |
| <i>X</i> <sub>258</sub> | = | 1-hydroxy-3-indolylmethylglucosinolate                   |
| <i>X</i> <sub>259</sub> | = | 1-methoxy-3-indolylmethylglucosinolate                   |
| <i>X</i> <sub>260</sub> | = | 4-hydroxy-3-indolylmethylglucosinolate                   |
| <i>X</i> <sub>261</sub> | = | 4-methoxy-3-indolylmethylglucosinolate                   |
| <i>X</i> <sub>262</sub> | = | histamine                                                |
| <i>X</i> <sub>263</sub> | = | imidazoleacetaldehyde                                    |
| <i>X</i> <sub>264</sub> | = | imidazole4acetate                                        |
| <i>X</i> <sub>265</sub> | = | imidazoloneacetate                                       |
| <i>X</i> <sub>266</sub> | = | NformiminoLaspartate                                     |
| <i>X</i> <sub>267</sub> | = | NformylLaspartate                                        |
| <i>X</i> <sub>268</sub> | = | D-glucono-1,5-lactone-6P                                 |
| <i>X</i> <sub>269</sub> | = | 6-phospho-D-gluconate                                    |
| <i>X</i> <sub>270</sub> | = | D-ribulose-5P                                            |
| <i>X</i> <sub>271</sub> | = | D-ribose-5P                                              |
| <i>X</i> <sub>272</sub> | = | D-ribose                                                 |
| <i>X</i> <sub>273</sub> | = | D-ribose-1P                                              |
| <i>X</i> <sub>274</sub> | = | D-ribose-1,5P                                            |
| <i>X</i> <sub>275</sub> | = | D-xylulose-5P                                            |
| <i>X</i> <sub>276</sub> | = | D-erythrose-4P                                           |
| <i>X</i> <sub>277</sub> | = | D-sedoheptulose-7P                                       |
| <i>X</i> <sub>278</sub> | = | D-gluconate                                              |
| <i>X</i> <sub>279</sub> | = | D-glucono-1,5-lactone                                    |
| <i>X</i> <sub>280</sub> | = | 2-dehydro-D-gluconate                                    |
| <i>X</i> <sub>281</sub> | = | 2-dehydrogluconate-6P                                    |
| <i>X</i> <sub>282</sub> | = | 5-phospho-B-D-ribosylamine                               |
| <i>X</i> <sub>283</sub> | = | 5-phosphoribosylglycineamine                             |
| <i>X</i> <sub>284</sub> | = | 5-phosphoribosyl-N-formylglycineamide                    |
| <i>X</i> <sub>285</sub> | = | 5-phosphoribosyl-N-formylglycineamidine                  |
| <i>X</i> <sub>286</sub> | = | 5-aminoimidazoleribonucleotide                           |
| <i>X</i> <sub>287</sub> | = | 4-carboxyaminoimidazoleribonucleotide                    |
| <i>X</i> <sub>288</sub> | = | 5-phosphoribosyl-4-N-succinocarboxamide-5-aminoimidazole |
| <i>X</i> <sub>289</sub> | = | phosphoribosylformamidocarboxamide                       |
| <i>X</i> <sub>290</sub> | = | inosine-5-phosphate                                      |
| <i>X</i> <sub>291</sub> | = | adenylosuccinate                                         |
| <i>X</i> <sub>292</sub> | = | xanthosine-5-phosphate                                   |
| <i>X</i> <sub>293</sub> | = | AMP                                                      |
| <i>X</i> <sub>294</sub> | = | GMP                                                      |

|           |   |                                                                 |
|-----------|---|-----------------------------------------------------------------|
| $X_{295}$ | = | inosine                                                         |
| $X_{296}$ | = | hypoxanthine                                                    |
| $X_{297}$ | = | xanthosine                                                      |
| $X_{298}$ | = | guanine                                                         |
| $X_{299}$ | = | xanthine                                                        |
| $X_{300}$ | = | urate                                                           |
| $X_{301}$ | = | 5-hydroxyisourate                                               |
| $X_{302}$ | = | 5-hydroxy-2-oxo-4-ureido-2,5-dihydro-1H-imidazole-5-carboxylate |
| $X_{303}$ | = | S-allantoin                                                     |
| $X_{304}$ | = | allantoate                                                      |
| $X_{305}$ | = | ureidoglycine                                                   |
| $X_{306}$ | = | ureidoglycolate                                                 |
| $X_{307}$ | = | urea                                                            |
| $X_{308}$ | = | GDP                                                             |
| $X_{309}$ | = | GTP                                                             |
| $X_{310}$ | = | dGDP                                                            |
| $X_{311}$ | = | dGTP                                                            |
| $X_{312}$ | = | ADP                                                             |
| $X_{313}$ | = | dADP                                                            |
| $X_{314}$ | = | ATP                                                             |
| $X_{315}$ | = | dATP                                                            |
| $X_{316}$ | = | dAMP                                                            |
| $X_{317}$ | = | deoxyadenosine                                                  |
| $X_{318}$ | = | deoxyinosine                                                    |
| $X_{319}$ | = | adenine                                                         |
| $X_{320}$ | = | guanosine                                                       |
| $X_{321}$ | = | NcarbamoylLAspartate                                            |
| $X_{322}$ | = | dihydroorotate                                                  |
| $X_{323}$ | = | orotate                                                         |
| $X_{324}$ | = | orotidine-5P                                                    |
| $X_{325}$ | = | UMP                                                             |
| $X_{326}$ | = | UDP                                                             |
| $X_{327}$ | = | UTP                                                             |
| $X_{328}$ | = | CTP                                                             |
| $X_{329}$ | = | CMP                                                             |
| $X_{330}$ | = | CDP                                                             |
| $X_{331}$ | = | dCDP                                                            |
| $X_{332}$ | = | dCTP                                                            |
| $X_{333}$ | = | dihydrouracil                                                   |
| $X_{334}$ | = | dUDP                                                            |
| $X_{335}$ | = | uracil                                                          |
| $X_{336}$ | = | dUTP                                                            |
| $X_{337}$ | = | dUMP                                                            |
| $X_{338}$ | = | dTMP                                                            |
| $X_{339}$ | = | dTDP                                                            |
| $X_{340}$ | = | dTTP                                                            |
| $X_{341}$ | = | dCMP                                                            |
| $X_{342}$ | = | deoxycytidine                                                   |
| $X_{343}$ | = | deoxyuridine                                                    |



|           |   |                                        |
|-----------|---|----------------------------------------|
| $X_{344}$ | = | 3-ureidopropionate                     |
| $X_{345}$ | = | thymidine                              |
| $X_{346}$ | = | thymine                                |
| $X_{347}$ | = | dihydrothymine                         |
| $X_{348}$ | = | 3-ureidoisobutyrate                    |
| $X_{349}$ | = | 3-aminoisobutanoate                    |
| $X_{350}$ | = | cytidine                               |
| $X_{351}$ | = | uridine                                |
| $X_{352}$ | = | Supplementation of threonine in medium |
| $X_{353}$ | = | Supplementation of lysine in medium    |
| $X_{354}$ | = | Transporation of threonine to cells    |
| $X_{355}$ | = | Transporation of lysine to cells       |

$V_1$  = sucrose\*2  
 $V_2$  = glucose6P - fructose6P  
 $V_3$  = fructose6P  
 $V_4$  = fructose16bisP  
 $V_5$  = fructose16bisP - glyceraldehyde3P  
 $V_6$  = fructose16bisP - dihydroxyacetoneP  
 $V_7$  = dihydroxyacetoneP - glyceraldehyde3P  
 $V_8$  = glyceraldehyde3P - 13diPglycerate  
 $V_9$  = 13diPglycerate - 3phosphoglycerate  
 $V_{10}$  = 3phosphoglycerate - 2phosphoglycerate  
 $V_{11}$  = 2phosphoglycerate - phosphoenolpyruvate  
 $V_{12}$  = phosphoenolpyruvate \* 6phosphoDgluconate\*\*0.5 / glutamate\*\*0.5  
 $V_{13}$  = pyruvate  
 $V_{14}$  = 3phosphoglycerate - 3phosphohydroxypyruvate  
 $V_{15}$  = 3phosphohydroxypyruvate\*\*0.5\*glutamate\*\*0.5  
 $V_{16}$  = 3phosphoserine  
 $V_{17}$  = Lserine  
 $V_{18}$  = Dserine  
 $V_{19}$  = Lserine - glycine  
 $V_{20}$  = glyoxylate\*\*0.5\*glutamate\*\*0.5  
 $V_{21}$  = glyoxylate\*\*0.5\*Lserine\*\*0.5  
 $V_{22}$  = threonine - glycine  
 $V_{23}$  = threonine\*valine\*\*0.5/isleucine\*\*0.5  
 $V_{24}$  = 2oxobutanoate\*pyruvate  
 $V_{25}$  = 2aceto2hydroxybutyrate  
 $V_{26}$  = 23dihydroxy3methylvalerate  
 $V_{27}$  = 2keto3methylvalerate\*\*0.5\*glutamate\*\*0.5 - isoleucine\*\*0.5\*ketoglutarate\*\*0.5  
 $V_{28}$  = 2keto3methylvalerate  
 $V_{29}$  = S2methylbutyrylCoA  
 $V_{30}$  = tigloylCoA  
 $V_{31}$  = 2methyl3hydroxybutyrylCoA  
 $V_{32}$  = 2methylacetoacetylCoA  
 $V_{33}$  = acetylCoA  
 $V_{34}$  = pyruvate / isoleucine\*\*0.5 / leucine\*\*0.5 / valine\*\*0.5  
 $V_{35}$  = 2acetolactate  
 $V_{36}$  = 23dihydroxyisovalerate  
 $V_{37}$  = 2ketoisovalerate\*\*0.5\*glutamate\*\*0.5 - valine\*\*0.5\*ketoglutarate\*\*0.5  
 $V_{38}$  = 2ketoisovalerate\*\*0.5\*acetylCoA\*\*0.5/leucine\*\*0.5  
 $V_{39}$  = 2isopropylmalate  
 $V_{40}$  = isopropylmaleate  
 $V_{41}$  = 3isopropylmalate  
 $V_{42}$  = 2isopropyl3oxosuccinate  
 $V_{43}$  = 2ketoisocaproate\*\*0.5\*glutamate\*\*0.5 - leucine\*\*0.5\*ketoglutarate\*\*0.5  
 $V_{44}$  = glutamate  
 $V_{45}$  = NacetylLglutamate  
 $V_{46}$  = NacetylglutamylP  
 $V_{47}$  = NacetylLglutamate5semialdehyde  
 $V_{48}$  = NacetylLornithine  
 $V_{49}$  = ornithine - citrulline  
 $V_{50}$  = carbamoylP - citrulline  
 $V_{51}$  = ornithine - carbamoylP  
 $V_{52}$  = citrulline  
 $V_{53}$  = argininosuccinate/argininosuccinate\*\*0.5  
 $V_{54}$  = glutamine  
 $V_{55}$  = arginine  
 $V_{56}$  = ornithine - glutamateGsemialdehyde  
 $V_{57}$  = glutamateGsemialdehyde  
 $V_{58}$  = S1pyrroline5carboxylate  
 $V_{59}$  = S1pyrroline5carboxylate  
 $V_{60}$  = arginine  
 $V_{61}$  = citrulline  
 $V_{62}$  = citrulline - ornithine\*\*0.5\*carbamoylP\*\*0.5  
 $V_{63}$  = glutamate  
 $V_{64}$  = succinatesemialdehyde  
 $V_{65}$  = aspartate\*\*0.5 \* ketoglutarate\*\*0.5  
 $V_{66}$  = Lserine / cysteine\*\*0.5  
 $V_{67}$  = OacetylLserine  
 $V_{68}$  = 5phosphoribosyl1pyrophosphate/histidine\*\*0.5  
 $V_{69}$  = phosphoribosylATP  
 $V_{70}$  = phosphoribosylAMP  
 $V_{71}$  = phosphoribosylformiminoAICARP  
 $V_{72}$  = phosphoribulosylformiminoAICARP\*\*0.5\*glutamine\*\*0.5  
 $V_{73}$  = DerythroimidazoleglycerolP  
 $V_{74}$  = imidazoleacetolP\*\*0.5\*glutamate\*\*0.5  
 $V_{75}$  = histidinolP  
 $V_{76}$  = histidinol  
 $V_{77}$  = histidinal

$V_{78}$  = cysteine  
 $V_{79}$  = pyruvate\*\*0.5\*glutamate\*\*0.5 – alanine\*\*0.5\*ketoglutarate\*\*0.5  
 $V_{80}$  = glutamine  
 $V_{81}$  = glutamate  
 $V_{82}$  = glutamate  
 $V_{83}$  = 4aminobutyrate\*\*0.5\*pyruvate\*\*0.5  
 $V_{84}$  = 4aminobutyrate\*\*0.5\*ketoglutarate\*\*0.5  
 $V_{85}$  = pyruvate  
 $V_{86}$  = citrate  
 $V_{87}$  = acetylCoA\*\*0.5 \* oxaloacetate\*\*0.5  
 $V_{88}$  = citrate  
 $V_{89}$  = cisaconitate  
 $V_{90}$  = isocitrate  
 $V_{91}$  = isocitrate  
 $V_{92}$  = ketoglutarate  
 $V_{93}$  = glyoxylate  
 $V_{94}$  = succinylCoA  
 $V_{95}$  = succinate/oxaloacetate\*\*0.5  
 $V_{96}$  = fumarate  
 $V_{97}$  = malate  
 $V_{98}$  = oxaloacetate  
 $V_{99}$  = oxaloacetate\*\*0.5\*glutamate\*\*0.5  
 $V_{100}$  = asparagine  
 $V_{101}$  = aspartate\*\*0.5\*glutamate\*\*0.5  
 $V_{102}$  = aspartate \* alanine\*\*0.5 \* cysteine\*\*0.5 \* isoleucine\*\*0.5 \* valine\*\*0.5 \* leucine\*\*0.5 \* Lserine\*\*0.5 / lysine\*\*0.5 / threonine\*\*0.5 / SadenosylMethionine\*\*0.5  
 $V_{103}$  = aspartate4P  
 $V_{104}$  = aspartatesemialdehyde / cysteine\*\*0.5 / threonine\*\*0.5  
 $V_{105}$  = homoserine  
 $V_{106}$  = OphosphoLhomoserine \* SadenosylMethionine\*\*0.5  
 $V_{107}$  = OphosphoLhomoserine\*\*0.5 \* cysteine\*\*0.5 / SadenosylMethionine\*\*0.5  
 $V_{108}$  = cystathionine  
 $V_{109}$  = aspartatesemialdehyde\*\*0.5 \* pyruvate\*\*0.5 / lysine\*\*0.5  
 $V_{110}$  = L23dihydrodipicolinate  
 $V_{111}$  = tetrahydrodipicolinate\*\*0.5 \* glutamate\*\*0.5  
 $V_{112}$  = Lldiamionopimelate  
 $V_{113}$  = mesodiamionopimelate  
 $V_{114}$  = SmethylMethionine\*\*0.5 \* homocysteine\*\*0.5  
 $V_{115}$  = methionine\*\*0.5 \* SadenosylMethionine\*\*0.5  
 $V_{116}$  = methionine / SadenosylMethionine\*\*0.5  
 $V_{117}$  = SadenosylMethionine  
 $V_{118}$  = SadenosylLhomocysteine  
 $V_{119}$  = homocysteine  
 $V_{120}$  = methionine  
 $V_{121}$  = SadenosylMethionine  
 $V_{122}$  = Smethyl5thioadenosine  
 $V_{123}$  = 5methylthioribose / SadenosylLhomocysteine\*\*0.5  
 $V_{124}$  = 5methylthioribose1P  
 $V_{125}$  = 5methioribulose1P  
 $V_{126}$  = 5methylthio23dioxopentylP  
 $V_{127}$  = 2hydroxy3keto5methylthio1phosphopentene  
 $V_{128}$  = 12dihydroxy3keto5methylthiopentene  
 $V_{129}$  = 2oxo4methylthiobutanoate – methionine  
 $V_{130}$  = Derythrose4P\*\*0.5 \* phosphoenolpyruvate\*\*0.5  
 $V_{131}$  = 3deoxyDarabinoheptulosonate7P  
 $V_{132}$  = 3dehydroquininate  
 $V_{133}$  = 3dehydroshikimate  
 $V_{134}$  = shikimate  
 $V_{135}$  = shikimate3P\*\*0.5 \* phosphoenolpyruvate\*\*0.5  
 $V_{136}$  = 5enolpyruvylshikimate3P  
 $V_{137}$  = chorismate \* tryptophan\*\*0.5 / phenylalanine\*\*0.5 / tyrosine\*\*0.5  
 $V_{138}$  = prephenate\*\*0.5 \* glutamate\*\*0.5  
 $V_{139}$  = arogenate  
 $V_{140}$  = arogenate / tyrosine\*\*0.5  
 $V_{141}$  = phenylalanine\*\*0.5 \* ketoglutarate\*\*0.5  
 $V_{142}$  = phenylalanine\*\*0.5 \* pyruvate\*\*0.5  
 $V_{143}$  = phenylpyruvate  
 $V_{144}$  = phenylacetaldehyde  
 $V_{145}$  = tyrosine\*\*0.5 \* ketoglutarate\*\*0.5  
 $V_{146}$  = phydroxyphenylpyruvate  
 $V_{147}$  = homogentisate  
 $V_{148}$  = maleylacetoacetate  
 $V_{149}$  = 4fumarylacetoacetate  
 $V_{150}$  = 4fumarylacetoacetate  
 $V_{151}$  = chorismate\*\*0.5 \* glutamine\*\*0.5 / tryptophan\*\*0.5  
 $V_{152}$  = anthranilate\*\*0.5 \* 5phosphoribosyl1pyrophosphate\*\*0.5  
 $V_{153}$  = N5phosphoribosylanthranilate  
 $V_{154}$  = 1Ocarboxyphenylamino1 deoxyribulose5P

$V_{155}$  = indole3glycerolP  
 $V_{156}$  = indole\*\*0.5 \* Lserine\*\*0.5  
 $V_{157}$  = glutamate\*\*0.5 \* cysteine\*\*0.5 / glutathione\*\*0.5  
 $V_{158}$  = glutamylcysteine / glutathione\*\*0.5  
 $V_{159}$  = pyruvate  
 $V_{160}$  = 2methylmalate  
 $V_{161}$  = methylmaleate  
 $V_{162}$  = 3methylmalate  
 $V_{163}$  = lysine - Dlysine  
 $V_{164}$  = Dlysine  
 $V_{165}$  = diaminohexanoate  
 $V_{166}$  = lysine  
 $V_{167}$  = hydroxylysine  
 $V_{168}$  = acetylhydroxylysine  
 $V_{169}$  = lysine - acetyllysine  
 $V_{170}$  = lysine  
 $V_{171}$  = cadaverine  
 $V_{172}$  = piperideine  
 $V_{173}$  = lysine  
 $V_{174}$  = aminopentanamide - aminopentanoate  
 $V_{175}$  = acetamidopentanoate - aminopentanoate  
 $V_{176}$  = acetamidooxohexanoate - acetamidopentanoate  
 $V_{177}$  = acetyllysine - acetamidooxohexanoate  
 $V_{178}$  = aminopentanoate - glutaratesemialdehyde  
 $V_{179}$  = glutaratesemialdehyde - glutarate  
 $V_{180}$  = glutarate  
 $V_{181}$  = lysine  
 $V_{182}$  = Nacetyllysine  
 $V_{183}$  = lysine  
 $V_{184}$  = Nacetyllysine - acetamidooxohexanoate  
 $V_{185}$  = acetamidooxohexanoate  
 $V_{186}$  = Dlysine  
 $V_{187}$  = aminooxohexanoate  
 $V_{188}$  = piperideine2carboxylate  
 $V_{189}$  = pipecolate  
 $V_{190}$  = lysine\*\*0.5 \* ketoglutarate\*\*0.5  
 $V_{191}$  = saccharopine - aminoadipatesemialdehyde  
 $V_{192}$  = piperideine6carboxylate - aminoadipatesemialdehyde  
 $V_{193}$  = aminoadipatesemialdehyde  
 $V_{194}$  = aminoadipate - oxoadipate  
 $V_{195}$  = oxoadipate  
 $V_{196}$  = glutaryl dihydrolipoamide - glutarylCoA  
 $V_{197}$  = glutarylCoA  
 $V_{198}$  = crotonoylCoA  
 $V_{199}$  = hydroxybutanoylCoA  
 $V_{200}$  = acetoacetylCoA  
 $V_{201}$  = 2oxo4methylthiobutanoate  
 $V_{202}$  = 22methylthioethylmalate  
 $V_{203}$  = 32methylthioethylmalate  
 $V_{204}$  = 2oxo5methylthiopentanoicacid  
 $V_{205}$  = 23methylthiopropylmalate  
 $V_{206}$  = 33methylthiopropylmalate  
 $V_{207}$  = 2oxo6methylthiohexanoate  
 $V_{208}$  = 24methylthiobutylmalate  
 $V_{209}$  = 34methylthiobutylmalate  
 $V_{210}$  = 2oxo7methylthioheptanoate  
 $V_{211}$  = 25methylthiopentylmalate  
 $V_{212}$  = 35methylthiobutylmalate  
 $V_{213}$  = 2oxo8methyloctanoate  
 $V_{214}$  = 26methylthiohexylmalate  
 $V_{215}$  = 36methylthiohexylmalate  
 $V_{216}$  = 2oxo9methylnonanoate  
 $V_{217}$  = 27methylthioheptylmalate  
 $V_{218}$  = 37methylthioheptylmalate  
 $V_{219}$  = 2oxo5methylthiopentanoicacid - homomethionine  
 $V_{220}$  = homomethionine  
 $V_{221}$  = methylthiobutanaldoxime  
 $V_{222}$  = methylthiobutanonitrileoxide  
 $V_{223}$  = methylthiobutylhydroximoylglutathione  
 $V_{224}$  = methylthiobutylhydroximoylcysteinylglycine  
 $V_{225}$  = methylthiobutylhydroximate  
 $V_{226}$  = methylthiopropyl desulfoglucosinolate  
 $V_{227}$  = methylthiopropylglucosinolate  
 $V_{228}$  = methylsulfinylpropylglucosinolate  
 $V_{229}$  = methylsulfinylpropylglucosinolate  
 $V_{230}$  = hydroxypropylglucosinolate  
 $V_{231}$  = hydroxypropylglucosinolate

V<sub>232</sub> = 2oxo6methylthiohexanoate – dihomomethionine  
V<sub>233</sub> = dihomomethionine  
V<sub>234</sub> = methylthiopentanaloxime  
V<sub>235</sub> = methylthiopentanitrileoxide  
V<sub>236</sub> = methylthiopentylhydroximoylglutathione  
V<sub>237</sub> = methylthiopentylhydroximoylcysteinylglycine  
V<sub>238</sub> = methylthiopentylhydroximate  
V<sub>239</sub> = methylthiobutylsulfoglucosinolate  
V<sub>240</sub> = methylthiobutylglucosinolate  
V<sub>241</sub> = methylsulfinylbutylglucosinolate  
V<sub>242</sub> = butenylglucosinolate  
V<sub>243</sub> = hydroxy3butenylglucosinolate  
V<sub>244</sub> = hydroxy3butenylglucosinolate  
V<sub>245</sub> = methylsulfinylbutylglucosinolate  
V<sub>246</sub> = hydroxybutylglucosinolate  
V<sub>247</sub> = hydroxybutylglucosinolate  
V<sub>248</sub> = 2oxo7methylthioheptanoate – trihomomethionine  
V<sub>249</sub> = trihomomethionine  
V<sub>250</sub> = methylthiohexanaloxime  
V<sub>251</sub> = methylthiohexanitrildoxide  
V<sub>252</sub> = methylthiohexylhydroximoylglutathione  
V<sub>253</sub> = methylthiohexylhydroximoylcysteinylglycine  
V<sub>254</sub> = methylthiohexylhydroximate  
V<sub>255</sub> = methylthiopentylsulfoglucosinolate  
V<sub>256</sub> = methylthiopentylglucosinolate  
V<sub>257</sub> = methylsulfinylpentylglucosinolate  
V<sub>258</sub> = 2oxo8methyloctanoate – tetrahomomethionine  
V<sub>259</sub> = tetrahomomethionine  
V<sub>260</sub> = methylthioheptanaloxime  
V<sub>261</sub> = methylthioheptanitrileoxide  
V<sub>262</sub> = methylthioheptylhydroximoylglutathione  
V<sub>263</sub> = methylthioheptylhydroximoylcysteinylglycine  
V<sub>264</sub> = methylthioheptylhydroximate  
V<sub>265</sub> = methylthiohexylsulfoglucosinolate  
V<sub>266</sub> = methylthiohexylglucosinolate  
V<sub>267</sub> = 2oxo9methylononanoate – pentahomomethionine  
V<sub>268</sub> = pentahomomethionine  
V<sub>269</sub> = methylthiooctanaloxime  
V<sub>270</sub> = methylthiooctanitrileoxide  
V<sub>271</sub> = methylthiooctylhydroximoylglutathione  
V<sub>272</sub> = methylthiooctylhydroximoylcysteinylglycine  
V<sub>273</sub> = methylthiooctylhydroximate  
V<sub>274</sub> = methylthioheptylsulfoglucosinolate  
V<sub>275</sub> = methylthioheptylglucosinolate  
V<sub>276</sub> = 2oxo10methylthiodecanoate – hexahomomethionine  
V<sub>277</sub> = hexahomomethionine  
V<sub>278</sub> = methylthiononanaloxime  
V<sub>279</sub> = methylthiononanitrileoxide  
V<sub>280</sub> = methylthiononylhydroximoylglutathione  
V<sub>281</sub> = methylthiononylhydroximoylcysteinylglycine  
V<sub>282</sub> = methylthiononylhydroximate  
V<sub>283</sub> = methylthiooctylsulfoglucosinolate  
V<sub>284</sub> = methylthiooctylglucosinolate  
V<sub>285</sub> = phenylalanine  
V<sub>286</sub> = phenylacetaloxime  
V<sub>287</sub> = phenylacetoneitrileoxide  
V<sub>288</sub> = phenylacetohydroximoylglutathione  
V<sub>289</sub> = phenylacetohydroximoylcysteinylglycine  
V<sub>290</sub> = phenylacetothiohydroximate  
V<sub>291</sub> = benzylsulfoglucosinolate  
V<sub>292</sub> = tryptophan  
V<sub>293</sub> = indole3acetaloxime  
V<sub>294</sub> = indole3acetoneitrileoxide  
V<sub>295</sub> = indole3acetohydroximoylglutathione  
V<sub>296</sub> = indole3acetohydroximoylcysteinylglycine  
V<sub>297</sub> = indolylmethylthiohydroximate  
V<sub>298</sub> = indolylmethylsulfoglucosinolate  
V<sub>299</sub> = indol3ylmethylglucosinolate  
V<sub>300</sub> = 1hydroxy3indolylmethylglucosinolate  
V<sub>301</sub> = indol3ylmethylglucosinolate  
V<sub>302</sub> = 4hydroxy3indolylmethylglucosinolate  
V<sub>303</sub> = histidine  
V<sub>304</sub> = histamine  
V<sub>305</sub> = imidazoleacetaldehyde  
V<sub>306</sub> = imidazole4acetate  
V<sub>307</sub> = imidazoloneacetate  
V<sub>308</sub> = NformiminoLaspertate

V<sub>309</sub> = NformylLAspartate  
V<sub>310</sub> = glucose6P  
V<sub>311</sub> = Dglucono15lactone6P  
V<sub>312</sub> = glucose6P  
V<sub>313</sub> = 6phosphoDgluconate  
V<sub>314</sub> = Dribose5P – Dribulose5P  
V<sub>315</sub> = Dribose – Dribose5P  
V<sub>316</sub> = Dribose5P – Dribose1P  
V<sub>317</sub> = Dribose1P  
V<sub>318</sub> = Dribose15P  
V<sub>319</sub> = Dribose5P – x5phosphoribosyl1pyrophosphate  
V<sub>320</sub> = Dxylulose5P\*\*0.5 \* Dribose5P\*\*0.5 – Dsedoheptulose7P\*\*0.5 \* glyceraldehyde3P\*\*0.5  
V<sub>321</sub> = Dsedoheptulose7P\*\*0.5 \* glyceraldehyde3P\*\*0.5 – fructose6P\*\*0.5 \* Derythrose4P\*\*0.5  
V<sub>322</sub> = Dgluconate  
V<sub>323</sub> = 2dehydroDgluconate – Dgluconate  
V<sub>324</sub> = Dgluconate  
V<sub>325</sub> = 2dehydroDgluconate  
V<sub>326</sub> = 2dehydrogluconate6P  
V<sub>327</sub> = Dglucono15lactone  
V<sub>328</sub> = glucose6P  
V<sub>329</sub> = Dribulose5P  
V<sub>330</sub> = Dxylulose5P\*\*0.5 \* Derythrose4P\*\*0.5 – fructose6P\*\*0.5 \* glyceraldehyde3P\*\*0.5  
V<sub>331</sub> = cystathionine  
V<sub>332</sub> = homocysteine\*\*0.5 \* Lserine\*\*0.5  
V<sub>333</sub> = homocysteine\*\*0.5 \* SadenosylLmethionine\*\*0.5  
V<sub>334</sub> = 5phosphoribosyl1pyrophosphate\*\*0.5 \* glutamine\*\*0.5  
V<sub>335</sub> = 5phosphoBDribosylamine\*\*0.5 \* glycine\*\*0.5  
V<sub>336</sub> = 5phosphoribosylglycineamine  
V<sub>337</sub> = 5phosphoribosylNformylglycineamide\*\*0.5 \* glutamine\*\*0.5  
V<sub>338</sub> = 5phosphoribosylNformylglycineamidine  
V<sub>339</sub> = 5aminoimidazoleribonucleotide  
V<sub>340</sub> = 4carboxyaminoimidazoleribonucleotide\*\*0.5 \* aspartate\*\*0.5  
V<sub>341</sub> = 5phosphoribosyl4Nsuccinocarboxamide5aminoimidazole  
V<sub>342</sub> = AICAR  
V<sub>343</sub> = phosphoribosylformamidocarboxamide  
V<sub>344</sub> = inosine5phosphate\*\*0.5 \* aspartate\*\*0.5  
V<sub>345</sub> = inosine5phosphate  
V<sub>346</sub> = adenylosuccinate  
V<sub>347</sub> = xanthosine5phosphate\*\*0.5 \* glutamine\*\*0.5  
V<sub>348</sub> = AMP  
V<sub>349</sub> = inosine5phosphate / adenosine\*\*0.5  
V<sub>350</sub> = inosine  
V<sub>351</sub> = hypoxanthine  
V<sub>352</sub> = inosine5phosphate  
V<sub>353</sub> = xanthosine5phosphate  
V<sub>354</sub> = xanthosine  
V<sub>355</sub> = GMP / adenosine\*\*0.5  
V<sub>356</sub> = guanosine  
V<sub>357</sub> = guanosine  
V<sub>358</sub> = guanine  
V<sub>359</sub> = xanthine  
V<sub>360</sub> = urate  
V<sub>361</sub> = 5hydroxyisourate  
V<sub>362</sub> = 5hydroxy2oxo4ureido25dihydro1Himidazole5carboxylate  
V<sub>363</sub> = Sallantoin  
V<sub>364</sub> = allantoate  
V<sub>365</sub> = ureidoglycine  
V<sub>366</sub> = ureidoglycolate  
V<sub>367</sub> = allantoate  
V<sub>368</sub> = urea  
V<sub>369</sub> = guanosine  
V<sub>370</sub> = guanine\*\*0.5 \* 5phosphoribosyl1pyrophosphate\*\*0.5  
V<sub>371</sub> = adenine\*\*0.5 \* 5phosphoribosyl1pyrophosphate\*\*0.5  
V<sub>372</sub> = adenosine / adenine\*\*0.5  
V<sub>373</sub> = adenosine  
V<sub>374</sub> = AMP  
V<sub>375</sub> = GMP  
V<sub>376</sub> = GDP  
V<sub>377</sub> = GDP  
V<sub>378</sub> = GTP  
V<sub>379</sub> = dGDP  
V<sub>380</sub> = AMP  
V<sub>381</sub> = ADP  
V<sub>382</sub> = ADP  
V<sub>383</sub> = dADP  
V<sub>384</sub> = ATP  
V<sub>385</sub> = dATP

V<sub>386</sub> = dAMP  
V<sub>387</sub> = deoxyadenosine  
V<sub>388</sub> = deoxyinosine  
V<sub>389</sub> = dGTP  
V<sub>390</sub> = glutamine  
V<sub>391</sub> = carbamoylP  
V<sub>392</sub> = NcarbamoylLAspartate  
V<sub>393</sub> = dihydroorotate  
V<sub>394</sub> =  $\text{orotate}^{**0.5} * 5\text{phosphoribosyl}1\text{pyrophosphate}^{**0.5}$   
V<sub>395</sub> = orotidine5P  
V<sub>396</sub> = UMP  
V<sub>397</sub> = UDP  
V<sub>398</sub> = UDP  
V<sub>399</sub> = UTP  
V<sub>400</sub> = UTP  
V<sub>401</sub> = UTP  
V<sub>402</sub> = CTP  
V<sub>403</sub> = CTP  
V<sub>404</sub> = CDP  
V<sub>405</sub> = CMP  
V<sub>406</sub> = CDP  
V<sub>407</sub> = dCDP - dCTP  
V<sub>408</sub> = CTP  
V<sub>409</sub> = UDP  
V<sub>410</sub> = dCTP  
V<sub>411</sub> = UTP  
V<sub>412</sub> = dUDP  
V<sub>413</sub> = dUTP  
V<sub>414</sub> = dUMP  
V<sub>415</sub> = dTMP  
V<sub>416</sub> = dTDP  
V<sub>417</sub> = dTTP  
V<sub>418</sub> = dCMP  
V<sub>419</sub> = dCDP  
V<sub>420</sub> = dCMP  
V<sub>421</sub> = dCMP  
V<sub>422</sub> = deoxycytidine  
V<sub>423</sub> = deoxyuridine  
V<sub>424</sub> = dUMP  
V<sub>425</sub> = dTMP  
V<sub>426</sub> = thymidine  
V<sub>427</sub> = thymidine  
V<sub>428</sub> = thymine  
V<sub>429</sub> = dihydrothymine  
V<sub>430</sub> = 3ureidoisobutyrate  
V<sub>431</sub> = 3aminoisobutanoate  
V<sub>432</sub> = CMP  
V<sub>433</sub> = cytidine  
V<sub>434</sub> = uridine  
V<sub>435</sub> =  $\text{uracil}^{**0.5} * 5\text{phosphoribosyl}1\text{pyrophosphate}^{**0.5}$   
V<sub>436</sub> = UMP  
V<sub>437</sub> =  $\text{uridine}^{**0.5} * \text{GTP}^{**0.5}$   
V<sub>438</sub> = uracil  
V<sub>439</sub> = dihydrouracil  
V<sub>440</sub> = 3ureidopropionate  
V<sub>441</sub> = methionine

$$\begin{aligned}
f_1 &= a2*( 0 ) \\
f_2 &= a2*( V_1 - V_2 - V_{310} - V_{312} - V_{328} ) \\
f_3 &= a2*( V_2 + V_4 - V_3 + V_{330} + V_{321} ) \\
f_4 &= a2*( V_3 - V_4 - V_5 - V_6 ) \\
f_5 &= a2*( V_5 + V_7 - V_8 + V_{320} - V_{321} + V_{330} ) \\
f_6 &= a2*( V_6 - V_7 ) \\
f_7 &= a2*( V_8 - V_9 ) \\
f_8 &= a2*( V_9 - V_{10} - V_{14} ) \\
f_9 &= a2*( V_{10} - V_{11} ) \\
f_{10} &= a2*( V_{11} + V_{13} - V_{12} ) \\
f_{11} &= a2*( V_{12} - V_{13} - V_{34} + V_{18} - V_{79} - V_{85} - V_{159} - \text{pyruvate} ) \\
f_{12} &= a2*( V_{34} - V_{35} ) \\
f_{13} &= a2*( V_{35} - V_{36} ) \\
f_{14} &= a2*( V_{36} - V_{37} - V_{38} ) \\
f_{15} &= a2*( V_{38} - V_{39} ) \\
f_{16} &= a2*( V_{39} - V_{40} ) \\
f_{17} &= a2*( V_{40} - V_{41} ) \\
f_{18} &= a2*( V_{41} - V_{42} ) \\
f_{19} &= a2*( V_{42} - V_{43} ) \\
f_{20} &= a2*( V_{43} - \text{leucine} ) \\
f_{21} &= a2*( V_{14} - V_{15} ) \\
f_{22} &= a2*( V_{15} - V_{16} ) \\
f_{23} &= a1*( V_{16} - V_{17} - V_{66} - V_{19} - \text{Lserine} ) \\
f_{24} &= a1*( V_{17} - V_{18} ) \\
f_{25} &= a2*( V_{19} + V_{20} + V_{21} + V_{22} - \text{glycine} ) \\
f_{26} &= a2*( V_{106} - V_{22} - V_{23} - \text{threonine} ) + 0.04*X353 \\
f_{27} &= a2*( V_{23} - V_{24} + V_{162} + V_{441} ) \\
f_{28} &= a2*( V_{24} - V_{25} ) \\
f_{29} &= a2*( V_{25} - V_{26} ) \\
f_{30} &= a2*( V_{26} - V_{27} - V_{28} ) \\
f_{31} &= a2*( V_{27} - \text{isoleucine} ) \\
f_{32} &= a2*( V_{28} - V_{29} ) \\
f_{33} &= a2*( V_{29} - V_{30} ) \\
f_{34} &= a2*( V_{30} - V_{31} ) \\
f_{35} &= a2*( V_{31} - V_{32} ) \\
f_{36} &= a2*( V_{32} - V_{33} + V_{85} + V_{86} + V_{200} ) \\
f_{37} &= a2*( V_{80} - V_{44} - V_{81} - V_{82} - V_{63} + V_{58} + V_{65}/2 - V_{157}/2 - V_{74}/2 - \text{glutamate} ) \\
f_{38} &= a2*( V_{44} - V_{45} ) \\
f_{39} &= a2*( V_{45} - V_{46} ) \\
f_{40} &= a2*( V_{46} - V_{47} ) \\
f_{41} &= a2*( V_{47} - V_{48} ) \\
f_{42} &= a3*( V_{48} - V_{49} - V_{51} + V_{55} - V_{56} + V_{61} + V_{62} ) \\
f_{43} &= a2*( V_{51} + V_{54} - V_{50} - V_{391} ) \\
f_{44} &= a2*( V_{63} - V_{54} - V_{80} + \text{constant} - \text{glutamine} - V_{72}/2 ) \\
f_{45} &= a2*( V_{49} + V_{50} - V_{52} + V_{60} - V_{61} - V_{62} ) \\
f_{46} &= a2*( V_{52} - V_{53} ) \\
f_{47} &= a2*( V_{53} - V_{55} - V_{60} - \text{arginine} ) \\
f_{48} &= a3*( V_{56} - V_{57} ) \\
f_{49} &= a3*( V_{57} - V_{58} - V_{59} ) \\
f_{50} &= a3*( V_{59} - \text{proline} ) \\
f_{51} &= a2*( V_{66} - V_{67} ) \\
f_{52} &= a2*( V_{319} + V_{318} - V_{68} - V_{334} - V_{370}/2 - V_{371}/2 - V_{394}/2 ) \\
f_{53} &= a2*( V_{68} - V_{69} ) \\
f_{54} &= a2*( V_{69} - V_{70} ) \\
f_{55} &= a2*( V_{70} - V_{71} ) \\
f_{56} &= a2*( V_{71} - V_{72}/2 ) \\
f_{57} &= a2*( V_{341} - V_{342} + V_{72}/2 ) \\
f_{58} &= a2*( V_{72}/2 - V_{73} ) \\
f_{59} &= a2*( V_{73} - V_{74}/2 ) \\
f_{60} &= a2*( V_{74} - V_{75} ) \\
f_{61} &= a2*( V_{75} - V_{76} ) \\
f_{62} &= a2*( V_{76} - V_{77} )
\end{aligned}$$



|           |   |                                                                                                                            |     |            |
|-----------|---|----------------------------------------------------------------------------------------------------------------------------|-----|------------|
| $f_{63}$  | = | $a2*( V_{77} - \text{histidine} - V_{303}$                                                                                 | )   |            |
| $f_{64}$  | = | $a2*( V_{87} - V_{88} - V_{86}$                                                                                            | )   |            |
| $f_{65}$  | = | $a2*( V_{88} - V_{89}$                                                                                                     | )   |            |
| $f_{66}$  | = | $a2*( V_{89} - V_{90} - V_{91}$                                                                                            | )   |            |
| $f_{67}$  | = | $a2*( V_{90} - V_{92} + V_{81} - V_{65}/2 - V_{190}/2$                                                                     | )   |            |
| $f_{68}$  | = | $a2*( V_{92} - V_{94}$                                                                                                     | )   |            |
| $f_{69}$  | = | $a2*( V_{94} - V_{95} + V_{64}$                                                                                            | )   |            |
| $f_{70}$  | = | $a2*( V_{95} - V_{96} + V_{150}$                                                                                           | )   |            |
| $f_{71}$  | = | $a2*( V_{96} + V_{93} - V_{97}$                                                                                            | )   |            |
| $f_{72}$  | = | $a2*( V_{97} - V_{87} + V_{65}/2$                                                                                          | )   |            |
| $f_{73}$  | = | $a0*( V_{79} + V_{78} + V_{440} - \text{alanine}$                                                                          | )   |            |
| $f_{74}$  | = | $a2*( V_{67} - V_{78} - V_{157}/2 - \text{cysteine}$                                                                       | )   |            |
| $f_{75}$  | = | $a2*( V_{82} - V_{83} - V_{84}$                                                                                            | )   |            |
| $f_{76}$  | = | $a2*( V_{83} + V_{84} - V_{64}$                                                                                            | )   |            |
| $f_{77}$  | = | $a2*( V_{101} - V_{100} - \text{asparagine}$                                                                               | )   |            |
| $f_{78}$  | = | $a2*( V_{100} - V_{101} - V_{102} - V_{65}/2 + V_{309} - \text{aspartate}$                                                 | )   |            |
| $f_{79}$  | = | $a2*( V_{102} - V_{103}$                                                                                                   | )   |            |
| $f_{80}$  | = | $a2*( V_{103} - V_{104} - V_{109}$                                                                                         | )   |            |
| $f_{81}$  | = | $a2*( V_{104} - V_{105}$                                                                                                   | )   |            |
| $f_{82}$  | = | $a2*( V_{105} - V_{106} - V_{107}$                                                                                         | )   |            |
| $f_{83}$  | = | $a3*( V_{107} - V_{108} + V_{332}$                                                                                         | )   |            |
| $f_{84}$  | = | $a3*( V_{118}/2 - V_{119} + V_{108} - V_{114}/2 - V_{332} - V_{333}/2$                                                     | )   |            |
| $f_{85}$  | = | $a3*( V_{129} - V_{120} + V_{119} - V_{116} + V_{114} - V_{115}/2 - \text{methionine} + V_{333}/2 + V_{441}$               | )   |            |
| $f_{86}$  | = | $a3*( V_{120} - V_{121} + V_{116} - V_{117} - V_{115}/2 - V_{333}/2$                                                       | )   |            |
| $f_{87}$  | = | $a3*( V_{117} - V_{118} + V_{115}/2 + V_{333}/2$                                                                           | )   |            |
| $f_{88}$  | = | $a3*( V_{374} - V_{373} - V_{372} + V_{118}/2$                                                                             | )   |            |
| $f_{89}$  | = | $a2*( V_{109} - V_{110}$                                                                                                   | )   |            |
| $f_{90}$  | = | $a2*( V_{110} - V_{111}$                                                                                                   | )   |            |
| $f_{91}$  | = | $a2*( V_{111} - V_{112}$                                                                                                   | )   |            |
| $f_{92}$  | = | $a2*( V_{112} - V_{113}$                                                                                                   | )   |            |
| $f_{93}$  | = | $a2*( V_{113} - \text{lysine} + V_{182} - V_{181} - V_{163} - V_{166} - V_{169} - V_{173} - V_{170} - V_{190}/2 - V_{183}$ | ) + | 0.011*X355 |
| $f_{94}$  | = | $a2*( V_{121} - V_{122}$                                                                                                   | )   |            |
| $f_{95}$  | = | $a2*( V_{122} - V_{123}$                                                                                                   | )   |            |
| $f_{96}$  | = | $a2*( V_{123} - V_{124}$                                                                                                   | )   |            |
| $f_{97}$  | = | $a2*( V_{124} - V_{125}$                                                                                                   | )   |            |
| $f_{98}$  | = | $a2*( V_{125} - V_{126}$                                                                                                   | )   |            |
| $f_{99}$  | = | $a2*( V_{126} - V_{127}$                                                                                                   | )   |            |
| $f_{100}$ | = | $a2*( V_{127} - V_{128}$                                                                                                   | )   |            |
| $f_{101}$ | = | $a2*( V_{128} - V_{129} - V_{201}$                                                                                         | )   |            |
| $f_{102}$ | = | $a2*( V_{130} - V_{131}$                                                                                                   | )   |            |
| $f_{103}$ | = | $a2*( V_{131} - V_{132}$                                                                                                   | )   |            |
| $f_{104}$ | = | $a2*( V_{132} - V_{133}$                                                                                                   | )   |            |
| $f_{105}$ | = | $a2*( V_{133} - V_{134}$                                                                                                   | )   |            |
| $f_{106}$ | = | $a2*( V_{134} - V_{135}$                                                                                                   | )   |            |
| $f_{107}$ | = | $a2*( V_{135} - V_{136}$                                                                                                   | )   |            |
| $f_{108}$ | = | $a2*( V_{137} - V_{138}$                                                                                                   | )   |            |
| $f_{109}$ | = | $a2*( V_{138} - V_{139} - V_{140}$                                                                                         | )   |            |
| $f_{110}$ | = | $a2*( V_{139} - V_{141} - V_{142} - V_{285} - \text{phenylalanine}$                                                        | )   |            |
| $f_{111}$ | = | $a2*( V_{141} + V_{142} - V_{143}$                                                                                         | )   |            |
| $f_{112}$ | = | $a2*( V_{143} - V_{144}$                                                                                                   | )   |            |
| $f_{113}$ | = | $a2*( V_{140} - V_{145} - \text{tyrosine}$                                                                                 | )   |            |
| $f_{114}$ | = | $a2*( V_{145} - V_{146}$                                                                                                   | )   |            |
| $f_{115}$ | = | $a2*( V_{146} - V_{147}$                                                                                                   | )   |            |
| $f_{116}$ | = | $a2*( V_{147} - V_{148}$                                                                                                   | )   |            |
| $f_{117}$ | = | $a2*( V_{148} - V_{149} - V_{150}$                                                                                         | )   |            |
| $f_{118}$ | = | $a2*( V_{151} - V_{152}$                                                                                                   | )   |            |
| $f_{119}$ | = | $a2*( V_{152} - V_{153}$                                                                                                   | )   |            |
| $f_{120}$ | = | $a2*( V_{153} - V_{154}$                                                                                                   | )   |            |
| $f_{121}$ | = | $a2*( V_{154} - V_{155}$                                                                                                   | )   |            |
| $f_{122}$ | = | $a2*( V_{155} - V_{156}$                                                                                                   | )   |            |
| $f_{123}$ | = | $a2*( V_{156} - V_{292} - \text{tryptophan}$                                                                               | )   |            |
| $f_{124}$ | = | $a2*( V_{37} - \text{valine}$                                                                                              | )   |            |

$$\begin{aligned}
f_{125} &= a2*(V_{91} - V_{93} - V_{20} - V_{21}) && ) \\
f_{126} &= a3*(V_{115}/2 - V_{114}/2) && ) \\
f_{127} &= a2*(V_{136} - V_{137} - V_{151}) && ) \\
f_{128} &= a2*(V_{157} - V_{158}) && ) \\
f_{129} &= a2*(V_{158} - \text{glutathione}) && ) \\
f_{130} &= a2*(V_{159} - V_{160}) && ) \\
f_{131} &= a2*(V_{160} - V_{161}) && ) \\
f_{132} &= a2*(V_{161} - V_{162}) && ) \\
f_{133} &= a3*(V_{166} - V_{167}) && ) \\
f_{134} &= a3*(V_{167} - V_{168}) && ) \\
f_{135} &= a3*(V_{163} - V_{164} - V_{186}) && ) \\
f_{136} &= a3*(V_{164} - V_{165}) && ) \\
f_{137} &= a3*(V_{181} - V_{182} - V_{184}) && ) \\
f_{138} &= a3*(V_{184} - V_{185} + V_{177} - V_{176}) && ) \\
f_{139} &= a3*(V_{183} + V_{185} + V_{186} - V_{187}) && ) \\
f_{140} &= a3*(V_{187} - V_{188}) && ) \\
f_{141} &= a3*(V_{188} - V_{189}) && ) \\
f_{142} &= a3*(V_{189} - V_{192}) && ) \\
f_{143} &= a3*(V_{192} + V_{191} - V_{193}) && ) \\
f_{144} &= a3*(V_{190} - V_{191}) && ) \\
f_{145} &= a3*(V_{170} - V_{171}) && ) \\
f_{146} &= a3*(V_{171} - V_{172}) && ) \\
f_{147} &= a3*(V_{173} - V_{174}) && ) \\
f_{148} &= a3*(V_{172} + V_{174} + V_{175} - V_{178}) && ) \\
f_{149} &= a3*(V_{169} - V_{177}) && ) \\
f_{150} &= a3*(V_{176} - V_{175}) && ) \\
f_{151} &= a3*(V_{178} - V_{179}) && ) \\
f_{152} &= a3*(V_{179} - V_{180}) && ) \\
f_{153} &= a3*(V_{193} - V_{194}) && ) \\
f_{154} &= a3*(V_{194} - V_{195}) && ) \\
f_{155} &= a3*(V_{195} - V_{196}) && ) \\
f_{156} &= a3*(V_{196} + V_{180} - V_{197}) && ) \\
f_{157} &= a3*(V_{197} - V_{198}) && ) \\
f_{158} &= a3*(V_{198} - V_{199}) && ) \\
f_{159} &= a3*(V_{199} - V_{200}) && ) \\
f_{160} &= a2*(V_{201} - V_{202}) && ) \\
f_{161} &= a2*(V_{202} - V_{203}) && ) \\
f_{162} &= a2*(V_{203} - V_{204} - V_{219}) && ) \\
f_{163} &= a2*(V_{204} - V_{205}) && ) \\
f_{164} &= a2*(V_{205} - V_{206}) && ) \\
f_{165} &= a2*(V_{206} - V_{207} - V_{232}) && ) \\
f_{166} &= a2*(V_{207} - V_{208}) && ) \\
f_{167} &= a2*(V_{208} - V_{209}) && ) \\
f_{168} &= a2*(V_{209} - V_{210} - V_{248}) && ) \\
f_{169} &= a2*(V_{210} - V_{211}) && ) \\
f_{170} &= a2*(V_{211} - V_{212}) && ) \\
f_{171} &= a2*(V_{212} - V_{213} - V_{258}) && ) \\
f_{172} &= a2*(V_{213} - V_{214}) && ) \\
f_{173} &= a2*(V_{214} - V_{215}) && ) \\
f_{174} &= a2*(V_{215} - V_{216} - V_{267}) && ) \\
f_{175} &= a2*(V_{216} - V_{217}) && ) \\
f_{176} &= a2*(V_{217} - V_{218}) && ) \\
f_{177} &= a2*(V_{218} - V_{276}) && ) \\
f_{178} &= a2*(V_{219} - V_{220}) && ) \\
f_{179} &= a2*(V_{220} - V_{221}) && ) \\
f_{180} &= a2*(V_{221} - V_{222}) && ) \\
f_{181} &= a2*(V_{222} - V_{223}) && ) \\
f_{182} &= a2*(V_{223} - V_{224}) && ) \\
f_{183} &= a2*(V_{224} - V_{225}) && ) \\
f_{184} &= a2*(V_{225} - V_{226}) && ) \\
f_{185} &= a2*(V_{226} - V_{227}) && ) \\
f_{186} &= a2*(V_{227} - V_{228} - V_{229}) && )
\end{aligned}$$

$$\begin{aligned}
f_{187} &= a2*(V_{228} - X_{187}) && ) \\
f_{188} &= a2*(V_{229} - V_{230} - V_{231}) && ) \\
f_{189} &= a2*(V_{230} - X_{189}) && ) \\
f_{190} &= a2*(V_{231} - X_{190}) && ) \\
f_{191} &= a2*(V_{232} - V_{233}) && ) \\
f_{192} &= a2*(V_{233} - V_{234}) && ) \\
f_{193} &= a2*(V_{234} - V_{235}) && ) \\
f_{194} &= a2*(V_{235} - V_{236}) && ) \\
f_{195} &= a2*(V_{236} - V_{237}) && ) \\
f_{196} &= a2*(V_{237} - V_{238}) && ) \\
f_{197} &= a2*(V_{238} - V_{239}) && ) \\
f_{198} &= a2*(V_{239} - V_{240}) && ) \\
f_{199} &= a2*(V_{240} - V_{241} - V_{245}) && ) \\
f_{200} &= a2*(V_{241} - V_{242}) && ) \\
f_{201} &= a2*(V_{242} - V_{243} - V_{244}) && ) \\
f_{202} &= a2*(V_{243} - X_{202}) && ) \\
f_{203} &= a2*(V_{244} - X_{203}) && ) \\
f_{204} &= a2*(V_{245} - V_{246} - V_{247}) && ) \\
f_{205} &= a2*(V_{246} - X_{205}) && ) \\
f_{206} &= a2*(V_{247} - X_{206}) && ) \\
f_{207} &= a2*(V_{248} - V_{249}) && ) \\
f_{208} &= a2*(V_{249} - V_{250}) && ) \\
f_{209} &= a2*(V_{250} - V_{251}) && ) \\
f_{210} &= a2*(V_{251} - V_{252}) && ) \\
f_{211} &= a2*(V_{252} - V_{253}) && ) \\
f_{212} &= a2*(V_{253} - V_{254}) && ) \\
f_{213} &= a2*(V_{254} - V_{255}) && ) \\
f_{214} &= a2*(V_{255} - V_{256}) && ) \\
f_{215} &= a2*(V_{256} - V_{257}) && ) \\
f_{216} &= a2*(V_{257} - X_{216}) && ) \\
f_{217} &= a2*(V_{258} - V_{259}) && ) \\
f_{218} &= a2*(V_{259} - V_{260}) && ) \\
f_{219} &= a2*(V_{260} - V_{261}) && ) \\
f_{220} &= a2*(V_{261} - V_{262}) && ) \\
f_{221} &= a2*(V_{262} - V_{263}) && ) \\
f_{222} &= a2*(V_{263} - V_{264}) && ) \\
f_{223} &= a2*(V_{264} - V_{265}) && ) \\
f_{224} &= a2*(V_{265} - V_{266}) && ) \\
f_{225} &= a2*(V_{266} - X_{225}) && ) \\
f_{226} &= a2*(V_{267} - V_{268}) && ) \\
f_{227} &= a2*(V_{268} - V_{269}) && ) \\
f_{228} &= a2*(V_{269} - V_{270}) && ) \\
f_{229} &= a2*(V_{270} - V_{271}) && ) \\
f_{230} &= a2*(V_{271} - V_{272}) && ) \\
f_{231} &= a2*(V_{272} - V_{273}) && ) \\
f_{232} &= a2*(V_{273} - V_{274}) && ) \\
f_{233} &= a2*(V_{274} - V_{275}) && ) \\
f_{234} &= a2*(V_{275} - X_{234}) && ) \\
f_{235} &= a2*(V_{276} - V_{277}) && ) \\
f_{236} &= a2*(V_{277} - V_{278}) && ) \\
f_{237} &= a2*(V_{278} - V_{279}) && ) \\
f_{238} &= a2*(V_{279} - V_{280}) && ) \\
f_{239} &= a2*(V_{280} - V_{281}) && ) \\
f_{240} &= a2*(V_{281} - V_{282}) && ) \\
f_{241} &= a2*(V_{282} - V_{283}) && ) \\
f_{242} &= a2*(V_{283} - V_{284}) && ) \\
f_{243} &= a2*(V_{284} - X_{243}) && ) \\
f_{244} &= a2*(V_{285} - V_{286}) && ) \\
f_{245} &= a2*(V_{286} - V_{287}) && ) \\
f_{246} &= a2*(V_{287} - V_{288}) && ) \\
f_{247} &= a2*(V_{288} - V_{289}) && ) \\
f_{248} &= a2*(V_{289} - V_{290}) && )
\end{aligned}$$

$$\begin{aligned}
f_{249} &= a2*( V_{290} - V_{291} ) \\
f_{250} &= a2*( V_{291} - X_{250} ) \\
f_{251} &= a2*( V_{292} - V_{293} ) \\
f_{252} &= a2*( V_{293} - V_{294} ) \\
f_{253} &= a2*( V_{294} - V_{295} ) \\
f_{254} &= a2*( V_{295} - V_{296} ) \\
f_{255} &= a2*( V_{296} - V_{297} ) \\
f_{256} &= a2*( V_{297} - V_{298} ) \\
f_{257} &= a2*( V_{298} - V_{299} - V_{301} ) \\
f_{258} &= a2*( V_{299} - V_{300} ) \\
f_{259} &= a2*( V_{300} - X_{259} ) \\
f_{260} &= a2*( V_{301} - V_{302} ) \\
f_{261} &= a2*( V_{302} - X_{261} ) \\
f_{262} &= a2*( V_{303} - V_{304} ) \\
f_{263} &= a2*( V_{304} - V_{305} ) \\
f_{264} &= a2*( V_{305} - V_{306} ) \\
f_{265} &= a2*( V_{306} - V_{307} ) \\
f_{266} &= a2*( V_{307} - V_{308} ) \\
f_{267} &= a2*( V_{308} - V_{309} ) \\
f_{268} &= a2*( V_{310} - V_{311} ) \\
f_{269} &= a2*( V_{311} + V_{312} + V_{322} + V_{326} - V_{313} ) \\
f_{270} &= a2*( V_{313} + V_{314} - V_{329} ) \\
f_{271} &= a2*( - V_{314} - V_{316} - V_{319} - V_{320} ) \\
f_{272} &= a2*( 0 ) \\
f_{273} &= a2*( V_{316} - V_{317} ) \\
f_{274} &= a2*( V_{317} - V_{318} ) \\
f_{275} &= a2*( V_{329} - V_{330} - V_{320} ) \\
f_{276} &= a2*( V_{321} - V_{330} - V_{130} ) \\
f_{277} &= a2*( V_{320} - V_{321} ) \\
f_{278} &= a2*( V_{327} - V_{324} + V_{323} - V_{322} ) \\
f_{279} &= a2*( V_{328} - V_{327} ) \\
f_{280} &= a2*( V_{324} - V_{323} - V_{325} ) \\
f_{281} &= a2*( V_{325} - V_{326} ) \\
f_{282} &= a2*( V_{334} - V_{335} ) \\
f_{283} &= a2*( V_{335} - V_{336} ) \\
f_{284} &= a2*( V_{336} - V_{337} ) \\
f_{285} &= a2*( V_{337} - V_{338} ) \\
f_{286} &= a2*( V_{338} - V_{339} ) \\
f_{287} &= a2*( V_{339} - V_{340} ) \\
f_{288} &= a2*( V_{340} - V_{341} ) \\
f_{289} &= a2*( V_{342} - V_{343} ) \\
f_{290} &= a2*( V_{343} - V_{344} - V_{345} + V_{348} - V_{349} - V_{352} ) \\
f_{291} &= a2*( V_{344} - V_{346} ) \\
f_{292} &= a2*( V_{345} - V_{347} + V_{352} - V_{353} ) \\
f_{293} &= a2*( V_{346} - V_{374} + V_{373} + V_{371} - V_{348} - V_{380} ) \\
f_{294} &= a2*( V_{347} - V_{355} + V_{369} + V_{370} - V_{375} ) \\
f_{295} &= a2*( V_{349} - V_{350} ) \\
f_{296} &= a2*( V_{350} - V_{351} + V_{388} ) \\
f_{297} &= a2*( V_{353} + V_{356} - V_{354} ) \\
f_{298} &= a2*( V_{357} - V_{358} - V_{370}/2 ) \\
f_{299} &= a2*( V_{351} + V_{354} + V_{358} - V_{359} ) \\
f_{300} &= a2*( V_{359} - V_{360} ) \\
f_{301} &= a2*( V_{360} - V_{361} ) \\
f_{302} &= a2*( V_{361} - V_{362} ) \\
f_{303} &= a2*( V_{362} - V_{363} ) \\
f_{304} &= a2*( V_{363} - V_{364} - V_{367} ) \\
f_{305} &= a2*( V_{364} - V_{365} ) \\
f_{306} &= a2*( V_{365} - V_{366} ) \\
f_{307} &= a2*( V_{366} + V_{367} - V_{368} ) \\
f_{308} &= a2*( V_{375} - V_{376} - V_{377} ) \\
f_{309} &= a2*( V_{377} - V_{378} ) \\
f_{310} &= a2*( V_{376} - V_{379} )
\end{aligned}$$

$$\begin{aligned}
f_{311} &= a2*( V_{378} + V_{379} - V_{389} ) \\
f_{312} &= a2*( V_{380} - V_{381} - V_{382} ) \\
f_{313} &= a2*( V_{381} - V_{383} ) \\
f_{314} &= a2*( V_{382} - V_{384} ) \\
f_{315} &= a2*( V_{383} + V_{384} - V_{385} ) \\
f_{316} &= a2*( V_{385} - V_{386} ) \\
f_{317} &= a2*( V_{386} - V_{387} ) \\
f_{318} &= a2*( V_{387} - V_{388} ) \\
f_{319} &= a2*( V_{372} - V_{371}/2 ) \\
f_{320} &= a2*( V_{355} - V_{357} - V_{369} - V_{356} ) \\
f_{321} &= a2*( V_{391} - V_{392} ) \\
f_{322} &= a2*( V_{392} - V_{393} ) \\
f_{323} &= a2*( V_{393} - V_{394}/2 ) \\
f_{324} &= a2*( V_{394} - V_{395} ) \\
f_{325} &= a2*( V_{395} + V_{397} + V_{400} - V_{396} + V_{437} - V_{436} + V_{435} ) \\
f_{326} &= a2*( V_{396} + V_{399} - V_{398} - V_{397} - V_{409} ) \\
f_{327} &= a2*( V_{398} - V_{399} - V_{400} - V_{401} - V_{411} ) \\
f_{328} &= a2*( V_{401} - V_{402} - V_{403} - V_{408} ) \\
f_{329} &= a2*( V_{402} + V_{404} - V_{405} - V_{432} ) \\
f_{330} &= a2*( V_{403} - V_{404} + V_{405} - V_{406} ) \\
f_{331} &= a2*( V_{406} - V_{407} + V_{418} - V_{419} ) \\
f_{332} &= a2*( V_{407} + V_{408} - V_{410} ) \\
f_{333} &= a2*( V_{438} - V_{439} ) \\
f_{334} &= a2*( V_{409} - V_{412} ) \\
f_{335} &= a2*( V_{434} - V_{435} - V_{438} ) \\
f_{336} &= a2*( V_{410} + V_{411} + V_{412} - V_{413} ) \\
f_{337} &= a2*( V_{413} - V_{414} + V_{420} + V_{423} ) \\
f_{338} &= a2*( V_{414} - V_{415} - V_{425} + V_{426} ) \\
f_{339} &= a2*( V_{415} - V_{416} ) \\
f_{340} &= a2*( V_{416} - V_{417} ) \\
f_{341} &= a2*( V_{419} - V_{418} - V_{421} - V_{420} ) \\
f_{342} &= a2*( V_{421} - V_{422} ) \\
f_{343} &= a2*( V_{422} - V_{423} ) \\
f_{344} &= a2*( V_{439} - V_{440} ) \\
f_{345} &= a2*( V_{425} - V_{426} - V_{427} ) \\
f_{346} &= a2*( V_{427} - V_{428} ) \\
f_{347} &= a2*( V_{428} - V_{429} ) \\
f_{348} &= a2*( V_{429} - V_{430} ) \\
f_{349} &= a2*( V_{430} - V_{431} ) \\
f_{350} &= a2*( V_{432} - V_{433} ) \\
f_{351} &= a2*( V_{433} + V_{436} - V_{437} - V_{434} )
\end{aligned}$$

#Supplementation

$$\begin{aligned}
f_{352} &= -0.04*X_{352} \\
f_{353} &= 0.04*X_{352} - 0.04*X_{353} \\
f_{354} &= -0.011*X_{354} \\
f_{355} &= 0.011*X_{354} + 0.011*X_{355}
\end{aligned}$$

| No.             | Simulation                          | AminoAcidAnalysis | MetabolomeAnalysis                      | CorrMetabolomeSimulation | CorrAminoAcidSimulation | CorrMetabolomeAminoAcid | pValMetabolomeSimulation | pValAminoAcidSimulation | pValMetabolomeAminoAcid |
|-----------------|-------------------------------------|-------------------|-----------------------------------------|--------------------------|-------------------------|-------------------------|--------------------------|-------------------------|-------------------------|
| X <sub>1</sub>  | sucrose                             |                   |                                         | 0.000                    | 0.000                   | 0.000                   | 0.000E+00                | 0.000E+00               | 0.000E+00               |
| X <sub>2</sub>  | glucose-6P                          |                   |                                         | 0.000                    | 0.000                   | 0.000                   | 0.000E+00                | 0.000E+00               | 0.000E+00               |
| X <sub>3</sub>  | fructose-6P                         |                   | 4i_D-Fructose-6-phosphate disodium salt | 0.755                    | 0.000                   | 0.000                   | 5.417E-03                | 0.000E+00               | 0.000E+00               |
| X <sub>4</sub>  | fructose-1,6-bis-P                  |                   |                                         | 0.000                    | 0.000                   | 0.000                   | 0.000E+00                | 0.000E+00               | 0.000E+00               |
| X <sub>5</sub>  | glyceraldehyde-3-P                  |                   |                                         | 0.000                    | 0.000                   | 0.000                   | 0.000E+00                | 0.000E+00               | 0.000E+00               |
| X <sub>6</sub>  | dihydroxyacetone-P                  |                   |                                         | 0.000                    | 0.000                   | 0.000                   | 0.000E+00                | 0.000E+00               | 0.000E+00               |
| X <sub>7</sub>  | 1,3-diPglycerate                    |                   |                                         | 0.000                    | 0.000                   | 0.000                   | 0.000E+00                | 0.000E+00               | 0.000E+00               |
| X <sub>8</sub>  | 3-phosphoglycerate                  |                   |                                         | 0.000                    | 0.000                   | 0.000                   | 0.000E+00                | 0.000E+00               | 0.000E+00               |
| X <sub>9</sub>  | 2-phosphoglycerate                  |                   |                                         | 0.000                    | 0.000                   | 0.000                   | 0.000E+00                | 0.000E+00               | 0.000E+00               |
| X <sub>10</sub> | phosphoenolpyruvate                 |                   |                                         | 0.000                    | 0.000                   | 0.000                   | 0.000E+00                | 0.000E+00               | 0.000E+00               |
| X <sub>11</sub> | pyruvate                            |                   |                                         | 0.000                    | 0.000                   | 0.000                   | 0.000E+00                | 0.000E+00               | 0.000E+00               |
| X <sub>12</sub> | 2-acetolactate                      |                   |                                         | 0.000                    | 0.000                   | 0.000                   | 0.000E+00                | 0.000E+00               | 0.000E+00               |
| X <sub>13</sub> | 2,3-dihydroxyisovalerate            |                   |                                         | 0.000                    | 0.000                   | 0.000                   | 0.000E+00                | 0.000E+00               | 0.000E+00               |
| X <sub>14</sub> | 2-ketoisovalerate                   |                   |                                         | 0.000                    | 0.000                   | 0.000                   | 0.000E+00                | 0.000E+00               | 0.000E+00               |
| X <sub>15</sub> | 2-isopropylmalate                   |                   |                                         | 0.000                    | 0.000                   | 0.000                   | 0.000E+00                | 0.000E+00               | 0.000E+00               |
| X <sub>16</sub> | isopropylmaleate                    |                   |                                         | 0.000                    | 0.000                   | 0.000                   | 0.000E+00                | 0.000E+00               | 0.000E+00               |
| X <sub>17</sub> | 3-isopropylmalate                   |                   |                                         | 0.000                    | 0.000                   | 0.000                   | 0.000E+00                | 0.000E+00               | 0.000E+00               |
| X <sub>18</sub> | 2-isopropyl-3-oxosuccinate          |                   |                                         | 0.000                    | 0.000                   | 0.000                   | 0.000E+00                | 0.000E+00               | 0.000E+00               |
| X <sub>19</sub> | 2-ketoisocaproate                   |                   |                                         | 0.000                    | 0.000                   | 0.000                   | 0.000E+00                | 0.000E+00               | 0.000E+00               |
| X <sub>20</sub> | leucine                             | Leu               | L-Leucine- (Cell Culture Reagent- Cry   | -0.678                   | -0.751                  | 0.654                   | 1.982E+00                | 1.989E+00               | 1.982E+00               |
| X <sub>21</sub> | 3-phosphohydroxypyruvate            |                   |                                         | 0.000                    | 0.000                   | 0.000                   | 0.000E+00                | 0.000E+00               | 0.000E+00               |
| X <sub>22</sub> | 3-phosphoserine                     |                   | o-Phospho-L-serine                      | -0.079                   | 0.000                   | 0.000                   | 1.184E+00                | 0.000E+00               | 0.000E+00               |
| X <sub>23</sub> | Lserine                             | Ser               | L-Serine                                | 0.816                    | 0.807                   | 0.887                   | 1.396E-03                | 1.624E-03               | 1.396E-03               |
| X <sub>24</sub> | Dserine                             |                   |                                         | 0.000                    | 0.000                   | 0.000                   | 0.000E+00                | 0.000E+00               | 0.000E+00               |
| X <sub>25</sub> | glycine                             | Gly               | Glycine                                 | 0.118                    | 0.739                   | -0.073                  | 7.275E-01                | 6.090E-01               | 7.275E-01               |
| X <sub>26</sub> | threonine                           | Thr               | L-allo-threonine                        | 0.811                    | 0.871                   | 0.955                   | 1.573E-03                | 4.364E-04               | 1.573E-03               |
| X <sub>27</sub> | 2-oxobutanoate                      |                   |                                         | 0.000                    | 0.000                   | 0.000                   | 0.000E+00                | 0.000E+00               | 0.000E+00               |
| X <sub>28</sub> | 2-aceto-2-hydroxybutyrate           |                   |                                         | 0.000                    | 0.000                   | 0.000                   | 0.000E+00                | 0.000E+00               | 0.000E+00               |
| X <sub>29</sub> | 2,3-dihydroxy-3-methylvalerate      |                   |                                         | 0.000                    | 0.000                   | 0.000                   | 0.000E+00                | 0.000E+00               | 0.000E+00               |
| X <sub>30</sub> | 2-keto-3-methylvalerate             |                   |                                         | 0.000                    | 0.000                   | 0.000                   | 0.000E+00                | 0.000E+00               | 0.000E+00               |
| X <sub>31</sub> | isoleucine                          | Ile               | L-Isoleucine                            | -0.811                   | -0.889                  | 0.784                   | 1.998E+00                | 2.000E+00               | 1.998E+00               |
| X <sub>32</sub> | S-2-methylbutyryl-CoA               |                   |                                         | 0.000                    | 0.000                   | 0.000                   | 0.000E+00                | 0.000E+00               | 0.000E+00               |
| X <sub>33</sub> | tigloylCoA                          |                   |                                         | 0.000                    | 0.000                   | 0.000                   | 0.000E+00                | 0.000E+00               | 0.000E+00               |
| X <sub>34</sub> | 2-methyl-3-hydroxybutyryl-CoA       |                   |                                         | 0.000                    | 0.000                   | 0.000                   | 0.000E+00                | 0.000E+00               | 0.000E+00               |
| X <sub>35</sub> | 2-methylacetoacetyl-CoA             |                   |                                         | 0.000                    | 0.000                   | 0.000                   | 0.000E+00                | 0.000E+00               | 0.000E+00               |
| X <sub>36</sub> | acetylCoA                           |                   |                                         | 0.000                    | 0.000                   | 0.000                   | 0.000E+00                | 0.000E+00               | 0.000E+00               |
| X <sub>37</sub> | glutamate                           | Glu               | L-Glutamic acid                         | 0.594                    | -0.226                  | 0.148                   | 4.855E-02                | 9.432E-02               | 4.855E-02               |
| X <sub>38</sub> | N-acetyl-L-glutamate                |                   | N-Acetyl-DL-glutamic acid               | 0.317                    | 0.000                   | 0.000                   | 3.368E-01                | 0.000E+00               | 0.000E+00               |
| X <sub>39</sub> | N-acetylglutamyl-P                  |                   |                                         | 0.000                    | 0.000                   | 0.000                   | 0.000E+00                | 0.000E+00               | 0.000E+00               |
| X <sub>40</sub> | N-acetyl-L-glutamate-5-semialdehyde |                   |                                         | 0.000                    | 0.000                   | 0.000                   | 0.000E+00                | 0.000E+00               | 0.000E+00               |
| X <sub>41</sub> | N-acetyl-L-ornithine                |                   |                                         | 0.000                    | 0.000                   | 0.000                   | 0.000E+00                | 0.000E+00               | 0.000E+00               |
| X <sub>42</sub> | ornithine                           |                   | L-Ornithine monohydrochloride           | 0.550                    | 0.000                   | 0.000                   | 7.409E-02                | 0.000E+00               | 0.000E+00               |
| X <sub>43</sub> | carbamoyl-P                         |                   |                                         | 0.000                    | 0.000                   | 0.000                   | 0.000E+00                | 0.000E+00               | 0.000E+00               |
| X <sub>44</sub> | glutamine                           | Gln               | L-Glutamine                             | 0.736                    | 0.427                   | 0.464                   | 7.632E-03                | 3.279E-02               | 7.632E-03               |
| X <sub>45</sub> | citrulline                          |                   |                                         | 0.000                    | 0.000                   | 0.000                   | 0.000E+00                | 0.000E+00               | 0.000E+00               |
| X <sub>46</sub> | argininosuccinate                   |                   |                                         | 0.000                    | 0.000                   | 0.000                   | 0.000E+00                | 0.000E+00               | 0.000E+00               |
| X <sub>47</sub> | arginine                            |                   |                                         | 0.000                    | 0.000                   | 0.000                   | 0.000E+00                | 0.000E+00               | 0.000E+00               |
| X <sub>48</sub> | glutamate-gamma-semialdehyde        |                   |                                         | 0.000                    | 0.000                   | 0.000                   | 0.000E+00                | 0.000E+00               | 0.000E+00               |
| X <sub>49</sub> | S-1-pyrroline-5-carboxylate         |                   |                                         | 0.000                    | 0.000                   | 0.000                   | 0.000E+00                | 0.000E+00               | 0.000E+00               |
| X <sub>50</sub> | proline                             | Pro               | L-Proline                               | 0.921                    | 0.869                   | 0.988                   | 2.005E-05                | 1.631E-04               | 2.005E-05               |
| X <sub>51</sub> | O-acetyl-L-serine                   |                   | O-acetyl-L-serine hydrochloride         | -0.735                   | 0.000                   | 0.000                   | 1.992E+00                | 0.000E+00               | 0.000E+00               |
| X <sub>52</sub> | 5-phosphoribosyl-1-pyrophosphate    |                   |                                         | 0.000                    | 0.000                   | 0.000                   | 0.000E+00                | 0.000E+00               | 0.000E+00               |
| X <sub>53</sub> | phosphoribosylATP                   |                   |                                         | 0.000                    | 0.000                   | 0.000                   | 0.000E+00                | 0.000E+00               | 0.000E+00               |
| X <sub>54</sub> | phosphoribosylAMP                   |                   |                                         | 0.000                    | 0.000                   | 0.000                   | 0.000E+00                | 0.000E+00               | 0.000E+00               |
| X <sub>55</sub> | phosphoribosylformiminoAICARP       |                   |                                         | 0.000                    | 0.000                   | 0.000                   | 0.000E+00                | 0.000E+00               | 0.000E+00               |
| X <sub>56</sub> | phosphoribuloylformiminoAICARP      |                   |                                         | 0.000                    | 0.000                   | 0.000                   | 0.000E+00                | 0.000E+00               | 0.000E+00               |
| X <sub>57</sub> | AICAR                               |                   |                                         | 0.000                    | 0.000                   | 0.000                   | 0.000E+00                | 0.000E+00               | 0.000E+00               |
| X <sub>58</sub> | D-erythroimidazoleglycerol-P        |                   |                                         | 0.000                    | 0.000                   | 0.000                   | 0.000E+00                | 0.000E+00               | 0.000E+00               |
| X <sub>59</sub> | imidazoleacetol-P                   |                   |                                         | 0.000                    | 0.000                   | 0.000                   | 0.000E+00                | 0.000E+00               | 0.000E+00               |
| X <sub>60</sub> | histidinolP                         |                   |                                         | 0.000                    | 0.000                   | 0.000                   | 0.000E+00                | 0.000E+00               | 0.000E+00               |

|                  |                                                |     |                                       |        |        |        |           |           |           |
|------------------|------------------------------------------------|-----|---------------------------------------|--------|--------|--------|-----------|-----------|-----------|
| X <sub>61</sub>  | histidinol                                     |     |                                       | 0.000  | 0.000  | 0.000  | 0.000E+00 | 0.000E+00 | 0.000E+00 |
| X <sub>62</sub>  | histidinal                                     |     |                                       | 0.000  | 0.000  | 0.000  | 0.000E+00 | 0.000E+00 | 0.000E+00 |
| X <sub>63</sub>  | histidine                                      |     | L-Histidine                           | 0.854  | 0.000  | 0.000  | 4.545E-04 | 0.000E+00 | 0.000E+00 |
| X <sub>64</sub>  | citrate                                        |     | Citric acid-Anhydrous                 | 0.199  | 0.000  | 0.000  | 5.546E-01 | 0.000E+00 | 0.000E+00 |
| X <sub>65</sub>  | cisaconitate                                   |     | cis-Aconitic Acid                     | -0.367 | 0.000  | 0.000  | 1.739E+00 | 0.000E+00 | 0.000E+00 |
| X <sub>66</sub>  | isocitrate                                     |     | DL-Isocitric acid trisodium salt      | 0.095  | 0.000  | 0.000  | 7.810E-01 | 0.000E+00 | 0.000E+00 |
| X <sub>67</sub>  | ketoglutarate                                  |     |                                       | 0.000  | 0.000  | 0.000  | 0.000E+00 | 0.000E+00 | 0.000E+00 |
| X <sub>68</sub>  | succinyl-CoA                                   |     |                                       | 0.000  | 0.000  | 0.000  | 0.000E+00 | 0.000E+00 | 0.000E+00 |
| X <sub>69</sub>  | succinate                                      |     |                                       | 0.000  | 0.000  | 0.000  | 0.000E+00 | 0.000E+00 | 0.000E+00 |
| X <sub>70</sub>  | fumarate                                       |     | Fumaric acid                          | -0.253 | 0.000  | 0.000  | 1.551E+00 | 0.000E+00 | 0.000E+00 |
| X <sub>71</sub>  | malate                                         |     | DL-Malic acid                         | 0.810  | 0.000  | 0.000  | 1.650E-03 | 0.000E+00 | 0.000E+00 |
| X <sub>72</sub>  | oxaloacetate                                   |     |                                       | 0.000  | 0.000  | 0.000  | 0.000E+00 | 0.000E+00 | 0.000E+00 |
| X <sub>73</sub>  | alanine                                        | Ala | 2i_L-Alanine_Sarcosine                | 0.908  | 0.704  | 0.911  | 4.314E-05 | 2.768E-03 | 4.314E-05 |
| X <sub>74</sub>  | cysteine                                       |     | DL-Cysteine                           | 0.772  | 0.000  | 0.000  | 3.842E-03 | 0.000E+00 | 0.000E+00 |
| X <sub>75</sub>  | 4-aminobutyrate                                |     | 3i_L-2-Aminobutyric acid_N-N-Dimethy  | -0.469 | 0.000  | 0.000  | 1.860E+00 | 0.000E+00 | 0.000E+00 |
| X <sub>76</sub>  | succinatesemialdehyde                          |     |                                       | 0.000  | 0.000  | 0.000  | 0.000E+00 | 0.000E+00 | 0.000E+00 |
| X <sub>77</sub>  | asparagine                                     | Asn | L-Asparagine                          | 0.390  | 0.412  | 0.021  | 2.302E-01 | 2.256E-01 | 2.302E-01 |
| X <sub>78</sub>  | aspartate                                      | Asp | L-Aspartic acid                       | 0.287  | -0.690 | -0.474 | 3.886E-01 | 2.601E-01 | 3.886E-01 |
| X <sub>79</sub>  | aspartate-4P                                   |     |                                       | 0.000  | 0.000  | 0.000  | 0.000E+00 | 0.000E+00 | 0.000E+00 |
| X <sub>80</sub>  | aspartatesemialdehyde                          |     |                                       | 0.000  | 0.000  | 0.000  | 0.000E+00 | 0.000E+00 | 0.000E+00 |
| X <sub>81</sub>  | homoserine                                     |     |                                       | 0.000  | 0.000  | 0.000  | 0.000E+00 | 0.000E+00 | 0.000E+00 |
| X <sub>82</sub>  | O-phospho-L-homoserine                         |     |                                       | 0.000  | 0.000  | 0.000  | 0.000E+00 | 0.000E+00 | 0.000E+00 |
| X <sub>83</sub>  | cystathionine                                  |     | Cystathionine                         | 0.732  | 0.000  | 0.000  | 8.053E-03 | 0.000E+00 | 0.000E+00 |
| X <sub>84</sub>  | homocysteine                                   |     | DL-homocysteine                       | 0.919  | 0.000  | 0.000  | 2.288E-05 | 0.000E+00 | 0.000E+00 |
| X <sub>85</sub>  | methionine                                     |     | L-Methionine                          | 0.702  | 0.000  | 0.000  | 1.310E-02 | 0.000E+00 | 0.000E+00 |
| X <sub>86</sub>  | S-adenosyl-L-methionine                        |     | S-(5'-Adenosyl)-L-methionine chloride | 0.884  | 0.000  | 0.000  | 1.432E-04 | 0.000E+00 | 0.000E+00 |
| X <sub>87</sub>  | S-adenosyl-L-homocysteine                      |     | S-Adenosyl-L-homocysteine             | 0.484  | 0.000  | 0.000  | 1.250E-01 | 0.000E+00 | 0.000E+00 |
| X <sub>88</sub>  | adenosine                                      |     | Adenosine                             | 0.284  | 0.000  | 0.000  | 3.934E-01 | 0.000E+00 | 0.000E+00 |
| X <sub>89</sub>  | L-2,3-dihydrodipicolinate                      |     |                                       | 0.000  | 0.000  | 0.000  | 0.000E+00 | 0.000E+00 | 0.000E+00 |
| X <sub>90</sub>  | tetrahydrodipicolinate                         |     |                                       | 0.000  | 0.000  | 0.000  | 0.000E+00 | 0.000E+00 | 0.000E+00 |
| X <sub>91</sub>  | L,L-diamionopimelate                           |     |                                       | 0.000  | 0.000  | 0.000  | 0.000E+00 | 0.000E+00 | 0.000E+00 |
| X <sub>92</sub>  | mesodiamionopimelate                           |     |                                       | 0.000  | 0.000  | 0.000  | 0.000E+00 | 0.000E+00 | 0.000E+00 |
| X <sub>93</sub>  | lysine                                         | Lys | L-Lysine                              | 0.881  | 0.991  | 0.902  | 1.633E-04 | 6.690E-10 | 1.633E-04 |
| X <sub>94</sub>  | S-methyl-5-thioadenosine                       |     | 5'-Deoxy-5'-Methylthioadenosine       | 0.704  | 0.000  | 0.000  | 1.271E-02 | 0.000E+00 | 0.000E+00 |
| X <sub>95</sub>  | 5-methylthioribose                             |     |                                       | 0.000  | 0.000  | 0.000  | 0.000E+00 | 0.000E+00 | 0.000E+00 |
| X <sub>96</sub>  | 5-methylthioribose-1P                          |     |                                       | 0.000  | 0.000  | 0.000  | 0.000E+00 | 0.000E+00 | 0.000E+00 |
| X <sub>97</sub>  | 5-methioribulose-1P                            |     |                                       | 0.000  | 0.000  | 0.000  | 0.000E+00 | 0.000E+00 | 0.000E+00 |
| X <sub>98</sub>  | 5-methylthio-2,3-dioxopentyl-P                 |     |                                       | 0.000  | 0.000  | 0.000  | 0.000E+00 | 0.000E+00 | 0.000E+00 |
| X <sub>99</sub>  | 2-hydroxy-3-keto-5-methylthio-1-phosphopentene |     |                                       | 0.000  | 0.000  | 0.000  | 0.000E+00 | 0.000E+00 | 0.000E+00 |
| X <sub>100</sub> | 1,2-dihydroxy-3-keto-5-methylthiopentene       |     |                                       | 0.000  | 0.000  | 0.000  | 0.000E+00 | 0.000E+00 | 0.000E+00 |
| X <sub>101</sub> | 2-oxo-4-methylthiobutanoate                    |     |                                       | 0.000  | 0.000  | 0.000  | 0.000E+00 | 0.000E+00 | 0.000E+00 |
| X <sub>102</sub> | 3-deoxyDarabinoheptulosonate-7P                |     |                                       | 0.000  | 0.000  | 0.000  | 0.000E+00 | 0.000E+00 | 0.000E+00 |
| X <sub>103</sub> | 3-dehydroquinate                               |     |                                       | 0.000  | 0.000  | 0.000  | 0.000E+00 | 0.000E+00 | 0.000E+00 |
| X <sub>104</sub> | 3-dehydroshikimate                             |     |                                       | 0.000  | 0.000  | 0.000  | 0.000E+00 | 0.000E+00 | 0.000E+00 |
| X <sub>105</sub> | shikimate                                      |     | (-)-Shikimic acid                     | 0.955  | 0.000  | 0.000  | 1.069E-06 | 0.000E+00 | 0.000E+00 |
| X <sub>106</sub> | shikimate-3P                                   |     |                                       | 0.000  | 0.000  | 0.000  | 0.000E+00 | 0.000E+00 | 0.000E+00 |
| X <sub>107</sub> | 5-enolpyruvylshikimate-3P                      |     |                                       | 0.000  | 0.000  | 0.000  | 0.000E+00 | 0.000E+00 | 0.000E+00 |
| X <sub>108</sub> | prephenate                                     |     |                                       | 0.000  | 0.000  | 0.000  | 0.000E+00 | 0.000E+00 | 0.000E+00 |
| X <sub>109</sub> | arogenate                                      |     |                                       | 0.000  | 0.000  | 0.000  | 0.000E+00 | 0.000E+00 | 0.000E+00 |
| X <sub>110</sub> | phenylalanine                                  |     | L(-)-Phenylalanine                    | -0.810 | 0.000  | 0.000  | 1.998E+00 | 0.000E+00 | 0.000E+00 |
| X <sub>111</sub> | phenylpyruvate                                 |     | Sodium phenylpyruvate                 | -0.792 | 0.000  | 0.000  | 1.998E+00 | 0.000E+00 | 0.000E+00 |
| X <sub>112</sub> | phenylacetaldehyde                             |     |                                       | 0.000  | 0.000  | 0.000  | 0.000E+00 | 0.000E+00 | 0.000E+00 |
| X <sub>113</sub> | tyrosine                                       | Tyr | L-Tyrosine                            | -0.175 | -0.608 | 0.102  | 1.395E+00 | 1.477E+00 | 1.395E+00 |
| X <sub>114</sub> | phydroxyphenylpyruvate                         |     |                                       | 0.000  | 0.000  | 0.000  | 0.000E+00 | 0.000E+00 | 0.000E+00 |
| X <sub>115</sub> | homogentisate                                  |     |                                       | 0.000  | 0.000  | 0.000  | 0.000E+00 | 0.000E+00 | 0.000E+00 |
| X <sub>116</sub> | maleylacetoacetate                             |     |                                       | 0.000  | 0.000  | 0.000  | 0.000E+00 | 0.000E+00 | 0.000E+00 |
| X <sub>117</sub> | 4-fumarylacetoacetate                          |     |                                       | 0.000  | 0.000  | 0.000  | 0.000E+00 | 0.000E+00 | 0.000E+00 |
| X <sub>118</sub> | anthranilate                                   |     |                                       | 0.000  | 0.000  | 0.000  | 0.000E+00 | 0.000E+00 | 0.000E+00 |
| X <sub>119</sub> | N-5-phosphoribosylanthranilate                 |     |                                       | 0.000  | 0.000  | 0.000  | 0.000E+00 | 0.000E+00 | 0.000E+00 |
| X <sub>120</sub> | 1-O-carboxyphenylamino-1-deoxyribulose-5P      |     |                                       | 0.000  | 0.000  | 0.000  | 0.000E+00 | 0.000E+00 | 0.000E+00 |
| X <sub>121</sub> | indole3glycerolP                               |     |                                       | 0.000  | 0.000  | 0.000  | 0.000E+00 | 0.000E+00 | 0.000E+00 |

|                  |                                            |      |                                         |        |        |        |           |           |           |
|------------------|--------------------------------------------|------|-----------------------------------------|--------|--------|--------|-----------|-----------|-----------|
| X <sub>122</sub> | indole                                     |      |                                         | 0.000  | 0.000  | 0.000  | 0.000E+00 | 0.000E+00 | 0.000E+00 |
| X <sub>123</sub> | tryptophan                                 | Tryp | L-Tryptophane                           | -0.619 | 0.326  | -0.084 | 1.963E+00 | 1.925E+00 | 1.963E+00 |
| X <sub>124</sub> | valine                                     | Val  | 2i_L-Norvaline_L-Valine                 | -0.055 | 0.430  | 0.066  | 1.128E+00 | 1.141E+00 | 1.128E+00 |
| X <sub>125</sub> | glyoxylate                                 |      |                                         | 0.000  | 0.000  | 0.000  | 0.000E+00 | 0.000E+00 | 0.000E+00 |
| X <sub>126</sub> | S-methylmethionine                         |      | S-Methylmethionine                      | 0.663  | 0.000  | 0.000  | 2.236E-02 | 0.000E+00 | 0.000E+00 |
| X <sub>127</sub> | chorismate                                 |      |                                         | 0.000  | 0.000  | 0.000  | 0.000E+00 | 0.000E+00 | 0.000E+00 |
| X <sub>128</sub> | glutamylcysteine                           |      |                                         | 0.000  | 0.000  | 0.000  | 0.000E+00 | 0.000E+00 | 0.000E+00 |
| X <sub>129</sub> | glutathione                                | GSH  | Glutathione (oxidized form)             | 0.668  | -0.193 | 0.055  | 2.081E-02 | 6.571E-02 | 2.081E-02 |
| X <sub>130</sub> | 2-methylmalate                             |      |                                         | 0.000  | 0.000  | 0.000  | 0.000E+00 | 0.000E+00 | 0.000E+00 |
| X <sub>131</sub> | methylmaleate                              |      |                                         | 0.000  | 0.000  | 0.000  | 0.000E+00 | 0.000E+00 | 0.000E+00 |
| X <sub>132</sub> | 3-methylmalate                             |      |                                         | 0.000  | 0.000  | 0.000  | 0.000E+00 | 0.000E+00 | 0.000E+00 |
| X <sub>133</sub> | hydroxylysine                              |      |                                         | 0.000  | 0.000  | 0.000  | 0.000E+00 | 0.000E+00 | 0.000E+00 |
| X <sub>134</sub> | acetylhydroxylysine                        |      |                                         | 0.000  | 0.000  | 0.000  | 0.000E+00 | 0.000E+00 | 0.000E+00 |
| X <sub>135</sub> | D-lysine                                   |      |                                         | 0.000  | 0.000  | 0.000  | 0.000E+00 | 0.000E+00 | 0.000E+00 |
| X <sub>136</sub> | diaminohexanoate                           |      |                                         | 0.000  | 0.000  | 0.000  | 0.000E+00 | 0.000E+00 | 0.000E+00 |
| X <sub>137</sub> | N-acetyllysine                             |      |                                         | 0.000  | 0.000  | 0.000  | 0.000E+00 | 0.000E+00 | 0.000E+00 |
| X <sub>138</sub> | acetamidooxohexanoate                      |      |                                         | 0.000  | 0.000  | 0.000  | 0.000E+00 | 0.000E+00 | 0.000E+00 |
| X <sub>139</sub> | aminooxohexanoate                          |      |                                         | 0.000  | 0.000  | 0.000  | 0.000E+00 | 0.000E+00 | 0.000E+00 |
| X <sub>140</sub> | piperidine-2-carboxylate                   |      |                                         | 0.000  | 0.000  | 0.000  | 0.000E+00 | 0.000E+00 | 0.000E+00 |
| X <sub>141</sub> | pipicolate                                 |      | DL-Pipecolic acid                       | 0.971  | 0.000  | 0.000  | 9.817E-08 | 0.000E+00 | 0.000E+00 |
| X <sub>142</sub> | piperidine-6-carboxylate                   |      |                                         | 0.000  | 0.000  | 0.000  | 0.000E+00 | 0.000E+00 | 0.000E+00 |
| X <sub>143</sub> | aminoadipatesemialdehyde                   |      |                                         | 0.000  | 0.000  | 0.000  | 0.000E+00 | 0.000E+00 | 0.000E+00 |
| X <sub>144</sub> | saccharopine                               |      | L-saccharopine                          | 0.939  | 0.000  | 0.000  | 5.139E-06 | 0.000E+00 | 0.000E+00 |
| X <sub>145</sub> | cadaverine                                 |      |                                         | 0.000  | 0.000  | 0.000  | 0.000E+00 | 0.000E+00 | 0.000E+00 |
| X <sub>146</sub> | piperidine                                 |      |                                         | 0.000  | 0.000  | 0.000  | 0.000E+00 | 0.000E+00 | 0.000E+00 |
| X <sub>147</sub> | aminopentanamide                           |      |                                         | 0.000  | 0.000  | 0.000  | 0.000E+00 | 0.000E+00 | 0.000E+00 |
| X <sub>148</sub> | aminopentanoate                            |      |                                         | 0.000  | 0.000  | 0.000  | 0.000E+00 | 0.000E+00 | 0.000E+00 |
| X <sub>149</sub> | acetyllysine                               |      |                                         | 0.000  | 0.000  | 0.000  | 0.000E+00 | 0.000E+00 | 0.000E+00 |
| X <sub>150</sub> | acetamidopentanoate                        |      |                                         | 0.000  | 0.000  | 0.000  | 0.000E+00 | 0.000E+00 | 0.000E+00 |
| X <sub>151</sub> | glutaratesemialdehyde                      |      |                                         | 0.000  | 0.000  | 0.000  | 0.000E+00 | 0.000E+00 | 0.000E+00 |
| X <sub>152</sub> | glutarate                                  |      | 3i_Ethylmalonic acid_Glutaric acid_Meth | 0.979  | 0.000  | 0.000  | 1.819E-08 | 0.000E+00 | 0.000E+00 |
| X <sub>153</sub> | aminoadipate                               |      | DL-2-Aminoadipic Acid                   | 0.945  | 0.000  | 0.000  | 3.105E-06 | 0.000E+00 | 0.000E+00 |
| X <sub>154</sub> | oxoadipate                                 |      |                                         | 0.000  | 0.000  | 0.000  | 0.000E+00 | 0.000E+00 | 0.000E+00 |
| X <sub>155</sub> | glutaryl-dihydroipoamide                   |      |                                         | 0.000  | 0.000  | 0.000  | 0.000E+00 | 0.000E+00 | 0.000E+00 |
| X <sub>156</sub> | glutaryl-CoA                               |      |                                         | 0.000  | 0.000  | 0.000  | 0.000E+00 | 0.000E+00 | 0.000E+00 |
| X <sub>157</sub> | crotonoyl-CoA                              |      |                                         | 0.000  | 0.000  | 0.000  | 0.000E+00 | 0.000E+00 | 0.000E+00 |
| X <sub>158</sub> | hydroxybutanoyl-CoA                        |      |                                         | 0.000  | 0.000  | 0.000  | 0.000E+00 | 0.000E+00 | 0.000E+00 |
| X <sub>159</sub> | acetoacetyl-CoA                            |      |                                         | 0.000  | 0.000  | 0.000  | 0.000E+00 | 0.000E+00 | 0.000E+00 |
| X <sub>160</sub> | 2,2-methylthioethylmalate                  |      |                                         | 0.000  | 0.000  | 0.000  | 0.000E+00 | 0.000E+00 | 0.000E+00 |
| X <sub>161</sub> | 3,2-methylthioethylmalate                  |      |                                         | 0.000  | 0.000  | 0.000  | 0.000E+00 | 0.000E+00 | 0.000E+00 |
| X <sub>162</sub> | 2-oxo-5-methylthiopentanoic acid           |      |                                         | 0.000  | 0.000  | 0.000  | 0.000E+00 | 0.000E+00 | 0.000E+00 |
| X <sub>163</sub> | 2,3-methylthiopropylmalate                 |      |                                         | 0.000  | 0.000  | 0.000  | 0.000E+00 | 0.000E+00 | 0.000E+00 |
| X <sub>164</sub> | 3,3-methylthiopropylmalate                 |      |                                         | 0.000  | 0.000  | 0.000  | 0.000E+00 | 0.000E+00 | 0.000E+00 |
| X <sub>165</sub> | 2-oxo-6-methylthiohexanoate                |      |                                         | 0.000  | 0.000  | 0.000  | 0.000E+00 | 0.000E+00 | 0.000E+00 |
| X <sub>166</sub> | 2,4-methylthiobutylmalate                  |      |                                         | 0.000  | 0.000  | 0.000  | 0.000E+00 | 0.000E+00 | 0.000E+00 |
| X <sub>167</sub> | 3,4-methylthiobutylmalate                  |      |                                         | 0.000  | 0.000  | 0.000  | 0.000E+00 | 0.000E+00 | 0.000E+00 |
| X <sub>168</sub> | 2-oxo-7-methylthioheptanoate               |      |                                         | 0.000  | 0.000  | 0.000  | 0.000E+00 | 0.000E+00 | 0.000E+00 |
| X <sub>169</sub> | 2,5-methylthiopentylmalate                 |      |                                         | 0.000  | 0.000  | 0.000  | 0.000E+00 | 0.000E+00 | 0.000E+00 |
| X <sub>170</sub> | 3,5-methylthiobutylmalate                  |      |                                         | 0.000  | 0.000  | 0.000  | 0.000E+00 | 0.000E+00 | 0.000E+00 |
| X <sub>171</sub> | 2-oxo-8-methyloctanoate                    |      |                                         | 0.000  | 0.000  | 0.000  | 0.000E+00 | 0.000E+00 | 0.000E+00 |
| X <sub>172</sub> | 2,6-methylthiohexylmalate                  |      |                                         | 0.000  | 0.000  | 0.000  | 0.000E+00 | 0.000E+00 | 0.000E+00 |
| X <sub>173</sub> | 3,6-methylthiohexylmalate                  |      |                                         | 0.000  | 0.000  | 0.000  | 0.000E+00 | 0.000E+00 | 0.000E+00 |
| X <sub>174</sub> | 2-oxo-9-methylononanoate                   |      |                                         | 0.000  | 0.000  | 0.000  | 0.000E+00 | 0.000E+00 | 0.000E+00 |
| X <sub>175</sub> | 2,7-methylthioheptylmalate                 |      |                                         | 0.000  | 0.000  | 0.000  | 0.000E+00 | 0.000E+00 | 0.000E+00 |
| X <sub>176</sub> | 3,7-methylthioheptylmalate                 |      |                                         | 0.000  | 0.000  | 0.000  | 0.000E+00 | 0.000E+00 | 0.000E+00 |
| X <sub>177</sub> | 2-oxo-1,0-methylthiodecanoate              |      |                                         | 0.000  | 0.000  | 0.000  | 0.000E+00 | 0.000E+00 | 0.000E+00 |
| X <sub>178</sub> | homomethionine                             |      | L-beta-homomethionine-HCl               | -0.180 | 0.000  | 0.000  | 1.407E+00 | 0.000E+00 | 0.000E+00 |
| X <sub>179</sub> | methylthiobutanaldoxime                    |      |                                         | 0.000  | 0.000  | 0.000  | 0.000E+00 | 0.000E+00 | 0.000E+00 |
| X <sub>180</sub> | methylthiobutanonitrile oxide              |      |                                         | 0.000  | 0.000  | 0.000  | 0.000E+00 | 0.000E+00 | 0.000E+00 |
| X <sub>181</sub> | methylthiobutylhydroximoylglutathione      |      |                                         | 0.000  | 0.000  | 0.000  | 0.000E+00 | 0.000E+00 | 0.000E+00 |
| X <sub>182</sub> | methylthiobutylhydroximoylcysteinylglycine |      |                                         | 0.000  | 0.000  | 0.000  | 0.000E+00 | 0.000E+00 | 0.000E+00 |



|                  |                                             |                                         |        |       |       |           |           |           |
|------------------|---------------------------------------------|-----------------------------------------|--------|-------|-------|-----------|-----------|-----------|
| X <sub>183</sub> | methylthiobutylhydroximate                  |                                         | 0.000  | 0.000 | 0.000 | 0.000E+00 | 0.000E+00 | 0.000E+00 |
| X <sub>184</sub> | methylthiopropylsulfoglucosinolate          |                                         | 0.000  | 0.000 | 0.000 | 0.000E+00 | 0.000E+00 | 0.000E+00 |
| X <sub>185</sub> | methylthiopropylglucosinolate               | 3-Methylthio-n-propyl-glucosinolate     | 0.093  | 0.000 | 0.000 | 7.853E-01 | 0.000E+00 | 0.000E+00 |
| X <sub>186</sub> | methylsulfanylpropylglucosinolate           | 3-Methylsulfanyl-n-propyl-glucosinolate | 0.196  | 0.000 | 0.000 | 5.618E-01 | 0.000E+00 | 0.000E+00 |
| X <sub>187</sub> | propenylglucosinolate                       |                                         | 0.000  | 0.000 | 0.000 | 0.000E+00 | 0.000E+00 | 0.000E+00 |
| X <sub>188</sub> | hydroxypropylglucosinolate                  |                                         | 0.000  | 0.000 | 0.000 | 0.000E+00 | 0.000E+00 | 0.000E+00 |
| X <sub>189</sub> | benzoyloxypropylglucosinolate               | 3-Benzoyloxy-n-propyl-glucosinolate     | 0.008  | 0.000 | 0.000 | 9.806E-01 | 0.000E+00 | 0.000E+00 |
| X <sub>190</sub> | sinapoyloxypropylglucosinolate              |                                         | 0.000  | 0.000 | 0.000 | 0.000E+00 | 0.000E+00 | 0.000E+00 |
| X <sub>191</sub> | dihomomethionine                            |                                         | 0.000  | 0.000 | 0.000 | 0.000E+00 | 0.000E+00 | 0.000E+00 |
| X <sub>192</sub> | methylthiopentanaloxime                     |                                         | 0.000  | 0.000 | 0.000 | 0.000E+00 | 0.000E+00 | 0.000E+00 |
| X <sub>193</sub> | methylthiopentanitrileoxide                 |                                         | 0.000  | 0.000 | 0.000 | 0.000E+00 | 0.000E+00 | 0.000E+00 |
| X <sub>194</sub> | methylthiopentylhydroximoylglutathione      |                                         | 0.000  | 0.000 | 0.000 | 0.000E+00 | 0.000E+00 | 0.000E+00 |
| X <sub>195</sub> | methylthiopentylhydroximoylcysteinylglycine |                                         | 0.000  | 0.000 | 0.000 | 0.000E+00 | 0.000E+00 | 0.000E+00 |
| X <sub>196</sub> | methylthiopentylhydroximate                 |                                         | 0.000  | 0.000 | 0.000 | 0.000E+00 | 0.000E+00 | 0.000E+00 |
| X <sub>197</sub> | methylthiobutylsulfoglucosinolate           |                                         | 0.000  | 0.000 | 0.000 | 0.000E+00 | 0.000E+00 | 0.000E+00 |
| X <sub>198</sub> | methylthiobutylglucosinolate                | 4-Methylthio-n-butyl-glucosinolate      | 0.021  | 0.000 | 0.000 | 9.502E-01 | 0.000E+00 | 0.000E+00 |
| X <sub>199</sub> | methylsulfanylbutylglucosinolate            | 4-Methylsulfanyl-n-butyl-glucosinolate  | -0.035 | 0.000 | 0.000 | 1.081E+00 | 0.000E+00 | 0.000E+00 |
| X <sub>200</sub> | butenylglucosinolate                        |                                         | 0.000  | 0.000 | 0.000 | 0.000E+00 | 0.000E+00 | 0.000E+00 |
| X <sub>201</sub> | hydroxy-3-butenylglucosinolate              |                                         | 0.000  | 0.000 | 0.000 | 0.000E+00 | 0.000E+00 | 0.000E+00 |
| X <sub>202</sub> | benzoyloxy-3-butenylglucosinolate           |                                         | 0.000  | 0.000 | 0.000 | 0.000E+00 | 0.000E+00 | 0.000E+00 |
| X <sub>203</sub> | sinapoyloxy-3-butenylglucosinolate          |                                         | 0.000  | 0.000 | 0.000 | 0.000E+00 | 0.000E+00 | 0.000E+00 |
| X <sub>204</sub> | hydroxybutylglucosinolate                   |                                         | 0.000  | 0.000 | 0.000 | 0.000E+00 | 0.000E+00 | 0.000E+00 |
| X <sub>205</sub> | benzoyloxybutylglucosinolate                |                                         | 0.000  | 0.000 | 0.000 | 0.000E+00 | 0.000E+00 | 0.000E+00 |
| X <sub>206</sub> | sinapoyloxybutylglucosinolate               |                                         | 0.000  | 0.000 | 0.000 | 0.000E+00 | 0.000E+00 | 0.000E+00 |
| X <sub>207</sub> | trihomomethionine                           |                                         | 0.000  | 0.000 | 0.000 | 0.000E+00 | 0.000E+00 | 0.000E+00 |
| X <sub>208</sub> | methylthiohexanaloxime                      |                                         | 0.000  | 0.000 | 0.000 | 0.000E+00 | 0.000E+00 | 0.000E+00 |
| X <sub>209</sub> | methylthiohexanitrildioxide                 |                                         | 0.000  | 0.000 | 0.000 | 0.000E+00 | 0.000E+00 | 0.000E+00 |
| X <sub>210</sub> | methylthiohexylhydroximoylglutathione       |                                         | 0.000  | 0.000 | 0.000 | 0.000E+00 | 0.000E+00 | 0.000E+00 |
| X <sub>211</sub> | methylthiohexylhydroximoylcysteinylglycine  |                                         | 0.000  | 0.000 | 0.000 | 0.000E+00 | 0.000E+00 | 0.000E+00 |
| X <sub>212</sub> | methylthiohexylhydroximate                  |                                         | 0.000  | 0.000 | 0.000 | 0.000E+00 | 0.000E+00 | 0.000E+00 |
| X <sub>213</sub> | methylthiopentylsulfoglucosinolate          |                                         | 0.000  | 0.000 | 0.000 | 0.000E+00 | 0.000E+00 | 0.000E+00 |
| X <sub>214</sub> | methylthiopentylglucosinolate               | 5-Methylthio-n-pentyl-glucosinolate     | -0.060 | 0.000 | 0.000 | 1.139E+00 | 0.000E+00 | 0.000E+00 |
| X <sub>215</sub> | methylsulfanylpentylglucosinolate           | 5-Methylsulfanyl-n-pentyl-glucosinolate | 0.125  | 0.000 | 0.000 | 7.136E-01 | 0.000E+00 | 0.000E+00 |
| X <sub>216</sub> | pentenylglucosinolate                       |                                         | 0.000  | 0.000 | 0.000 | 0.000E+00 | 0.000E+00 | 0.000E+00 |
| X <sub>217</sub> | tetrahomomethionine                         |                                         | 0.000  | 0.000 | 0.000 | 0.000E+00 | 0.000E+00 | 0.000E+00 |
| X <sub>218</sub> | methylthioheptanaloxime                     |                                         | 0.000  | 0.000 | 0.000 | 0.000E+00 | 0.000E+00 | 0.000E+00 |
| X <sub>219</sub> | methylthioheptanitrileoxide                 |                                         | 0.000  | 0.000 | 0.000 | 0.000E+00 | 0.000E+00 | 0.000E+00 |
| X <sub>220</sub> | methylthioheptylhydroximoylglutathione      |                                         | 0.000  | 0.000 | 0.000 | 0.000E+00 | 0.000E+00 | 0.000E+00 |
| X <sub>221</sub> | methylthioheptylhydroximoylcysteinylglycine |                                         | 0.000  | 0.000 | 0.000 | 0.000E+00 | 0.000E+00 | 0.000E+00 |
| X <sub>222</sub> | methylthioheptylhydroximate                 |                                         | 0.000  | 0.000 | 0.000 | 0.000E+00 | 0.000E+00 | 0.000E+00 |
| X <sub>223</sub> | methylthiohexylsulfoglucosinolate           |                                         | 0.000  | 0.000 | 0.000 | 0.000E+00 | 0.000E+00 | 0.000E+00 |
| X <sub>224</sub> | methylthiohexylglucosinolate                | 6-Methylthio-n-hexyl-glucosinolate      | -0.058 | 0.000 | 0.000 | 1.136E+00 | 0.000E+00 | 0.000E+00 |
| X <sub>225</sub> | methylsulfanylhexylglucosinolate            | 6-Methylsulfanyl-n-hexyl-glucosinolate  | 0.001  | 0.000 | 0.000 | 9.972E-01 | 0.000E+00 | 0.000E+00 |
| X <sub>226</sub> | pentahomomethionine                         |                                         | 0.000  | 0.000 | 0.000 | 0.000E+00 | 0.000E+00 | 0.000E+00 |
| X <sub>227</sub> | methylthiooctanaloxime                      |                                         | 0.000  | 0.000 | 0.000 | 0.000E+00 | 0.000E+00 | 0.000E+00 |
| X <sub>228</sub> | methylthiooctanitrileoxide                  |                                         | 0.000  | 0.000 | 0.000 | 0.000E+00 | 0.000E+00 | 0.000E+00 |
| X <sub>229</sub> | methylthiooctylhydroximoylglutathione       |                                         | 0.000  | 0.000 | 0.000 | 0.000E+00 | 0.000E+00 | 0.000E+00 |
| X <sub>230</sub> | methylthiooctylhydroximoylcysteinylglycine  |                                         | 0.000  | 0.000 | 0.000 | 0.000E+00 | 0.000E+00 | 0.000E+00 |
| X <sub>231</sub> | methylthiooctylhydroximate                  |                                         | 0.000  | 0.000 | 0.000 | 0.000E+00 | 0.000E+00 | 0.000E+00 |
| X <sub>232</sub> | methylthioheptylsulfoglucosinolate          |                                         | 0.000  | 0.000 | 0.000 | 0.000E+00 | 0.000E+00 | 0.000E+00 |
| X <sub>233</sub> | methylthioheptylglucosinolate               | 7-Methylthio-n-heptyl-glucosinolate     | -0.051 | 0.000 | 0.000 | 1.119E+00 | 0.000E+00 | 0.000E+00 |
| X <sub>234</sub> | methylsulfanylheptylglucosinolate           | 7-Methylsulfanyl-n-heptyl-glucosinolate | 0.306  | 0.000 | 0.000 | 3.553E-01 | 0.000E+00 | 0.000E+00 |
| X <sub>235</sub> | hexahomomethionine                          |                                         | 0.000  | 0.000 | 0.000 | 0.000E+00 | 0.000E+00 | 0.000E+00 |
| X <sub>236</sub> | methylthiononananaloxime                    |                                         | 0.000  | 0.000 | 0.000 | 0.000E+00 | 0.000E+00 | 0.000E+00 |
| X <sub>237</sub> | methylthiononanitrileoxide                  |                                         | 0.000  | 0.000 | 0.000 | 0.000E+00 | 0.000E+00 | 0.000E+00 |
| X <sub>238</sub> | methylthiononylhydroximoylglutathione       |                                         | 0.000  | 0.000 | 0.000 | 0.000E+00 | 0.000E+00 | 0.000E+00 |
| X <sub>239</sub> | methylthiononylhydroximoylcysteinylglycine  |                                         | 0.000  | 0.000 | 0.000 | 0.000E+00 | 0.000E+00 | 0.000E+00 |
| X <sub>240</sub> | methylthiononylhydroximate                  |                                         | 0.000  | 0.000 | 0.000 | 0.000E+00 | 0.000E+00 | 0.000E+00 |
| X <sub>241</sub> | methylthiooctylsulfoglucosinolate           |                                         | 0.000  | 0.000 | 0.000 | 0.000E+00 | 0.000E+00 | 0.000E+00 |
| X <sub>242</sub> | methylthiooctylglucosinolate                | 8-Methylthio-n-octyl-glucosinolate      | -0.061 | 0.000 | 0.000 | 1.143E+00 | 0.000E+00 | 0.000E+00 |
| X <sub>243</sub> | methylsulfanyloctylglucosinolate            | 8-Methylsulfanyl-n-octyl-glucosinolate  | 0.409  | 0.000 | 0.000 | 2.058E-01 | 0.000E+00 | 0.000E+00 |

|                  |                                                                 |                                       |        |       |       |           |           |           |
|------------------|-----------------------------------------------------------------|---------------------------------------|--------|-------|-------|-----------|-----------|-----------|
| X <sub>244</sub> | phenylacetaldoxime                                              |                                       | 0.000  | 0.000 | 0.000 | 0.000E+00 | 0.000E+00 | 0.000E+00 |
| X <sub>245</sub> | phenylacetoneitrileoxide                                        |                                       | 0.000  | 0.000 | 0.000 | 0.000E+00 | 0.000E+00 | 0.000E+00 |
| X <sub>246</sub> | phenylacetohydroximoylglutathione                               |                                       | 0.000  | 0.000 | 0.000 | 0.000E+00 | 0.000E+00 | 0.000E+00 |
| X <sub>247</sub> | phenylacetohydroximoylcysteinylglycine                          |                                       | 0.000  | 0.000 | 0.000 | 0.000E+00 | 0.000E+00 | 0.000E+00 |
| X <sub>248</sub> | phenylacetothiohydroximate                                      |                                       | 0.000  | 0.000 | 0.000 | 0.000E+00 | 0.000E+00 | 0.000E+00 |
| X <sub>249</sub> | benzylsulfoglucosinolate                                        |                                       | 0.000  | 0.000 | 0.000 | 0.000E+00 | 0.000E+00 | 0.000E+00 |
| X <sub>250</sub> | benzylglucosinolate                                             |                                       | 0.000  | 0.000 | 0.000 | 0.000E+00 | 0.000E+00 | 0.000E+00 |
| X <sub>251</sub> | indole-3-acetaldoxime                                           |                                       | 0.000  | 0.000 | 0.000 | 0.000E+00 | 0.000E+00 | 0.000E+00 |
| X <sub>252</sub> | indole-3-acetonitrileoxide                                      |                                       | 0.000  | 0.000 | 0.000 | 0.000E+00 | 0.000E+00 | 0.000E+00 |
| X <sub>253</sub> | indole-3-acetohydroximoylglutathione                            |                                       | 0.000  | 0.000 | 0.000 | 0.000E+00 | 0.000E+00 | 0.000E+00 |
| X <sub>254</sub> | indole-3-acetohydroximoylcysteinylglycine                       |                                       | 0.000  | 0.000 | 0.000 | 0.000E+00 | 0.000E+00 | 0.000E+00 |
| X <sub>255</sub> | indolylmethylthiohydroximate                                    |                                       | 0.000  | 0.000 | 0.000 | 0.000E+00 | 0.000E+00 | 0.000E+00 |
| X <sub>256</sub> | indolylmethylsulfoglucosinolate                                 |                                       | 0.000  | 0.000 | 0.000 | 0.000E+00 | 0.000E+00 | 0.000E+00 |
| X <sub>257</sub> | indol-3-ylmethylglucosinolate                                   | Indol-3-ylmethyl-glucosinolate        | -0.615 | 0.000 | 0.000 | 1.961E+00 | 0.000E+00 | 0.000E+00 |
| X <sub>258</sub> | 1-hydroxy-3-indolylmethylglucosinolate                          |                                       | 0.000  | 0.000 | 0.000 | 0.000E+00 | 0.000E+00 | 0.000E+00 |
| X <sub>259</sub> | 1-methoxy-3-indolylmethylglucosinolate                          | 1-Methoxyindole-glucosinolate         | -0.112 | 0.000 | 0.000 | 1.259E+00 | 0.000E+00 | 0.000E+00 |
| X <sub>260</sub> | 4-hydroxy-3-indolylmethylglucosinolate                          |                                       | 0.000  | 0.000 | 0.000 | 0.000E+00 | 0.000E+00 | 0.000E+00 |
| X <sub>261</sub> | 4-methoxy-3-indolylmethylglucosinolate                          | 4-Methoxyindole-glucosinolate         | 0.852  | 0.000 | 0.000 | 4.842E-04 | 0.000E+00 | 0.000E+00 |
| X <sub>262</sub> | histamine                                                       |                                       | 0.000  | 0.000 | 0.000 | 0.000E+00 | 0.000E+00 | 0.000E+00 |
| X <sub>263</sub> | imidazoleacetaldehyde                                           |                                       | 0.000  | 0.000 | 0.000 | 0.000E+00 | 0.000E+00 | 0.000E+00 |
| X <sub>264</sub> | imidazole4acetate                                               |                                       | 0.000  | 0.000 | 0.000 | 0.000E+00 | 0.000E+00 | 0.000E+00 |
| X <sub>265</sub> | imidazoloneacetate                                              |                                       | 0.000  | 0.000 | 0.000 | 0.000E+00 | 0.000E+00 | 0.000E+00 |
| X <sub>266</sub> | NformiminoLaspertate                                            |                                       | 0.000  | 0.000 | 0.000 | 0.000E+00 | 0.000E+00 | 0.000E+00 |
| X <sub>267</sub> | NformylLaspertate                                               |                                       | 0.000  | 0.000 | 0.000 | 0.000E+00 | 0.000E+00 | 0.000E+00 |
| X <sub>268</sub> | D-glucono-1,5-lactone-6P                                        |                                       | 0.000  | 0.000 | 0.000 | 0.000E+00 | 0.000E+00 | 0.000E+00 |
| X <sub>269</sub> | 6-phospho-D-gluconate                                           |                                       | 0.000  | 0.000 | 0.000 | 0.000E+00 | 0.000E+00 | 0.000E+00 |
| X <sub>270</sub> | D-ribose-5P                                                     |                                       | 0.000  | 0.000 | 0.000 | 0.000E+00 | 0.000E+00 | 0.000E+00 |
| X <sub>271</sub> | D-ribose-5P                                                     | D-Ribose-5-phosphate disodium salt hy | 0.341  | 0.000 | 0.000 | 2.994E-01 | 0.000E+00 | 0.000E+00 |
| X <sub>272</sub> | D-ribose                                                        |                                       | 0.000  | 0.000 | 0.000 | 0.000E+00 | 0.000E+00 | 0.000E+00 |
| X <sub>273</sub> | D-ribose-1P                                                     |                                       | 0.000  | 0.000 | 0.000 | 0.000E+00 | 0.000E+00 | 0.000E+00 |
| X <sub>274</sub> | D-ribose-1,5P                                                   |                                       | 0.000  | 0.000 | 0.000 | 0.000E+00 | 0.000E+00 | 0.000E+00 |
| X <sub>275</sub> | D-xylulose-5P                                                   |                                       | 0.000  | 0.000 | 0.000 | 0.000E+00 | 0.000E+00 | 0.000E+00 |
| X <sub>276</sub> | D-erythrose-4P                                                  | D-Erythrose-4-phosphate sodium salt   | 0.717  | 0.000 | 0.000 | 1.035E-02 | 0.000E+00 | 0.000E+00 |
| X <sub>277</sub> | D-sedoheptulose-7P                                              |                                       | 0.000  | 0.000 | 0.000 | 0.000E+00 | 0.000E+00 | 0.000E+00 |
| X <sub>278</sub> | D-gluconate                                                     |                                       | 0.000  | 0.000 | 0.000 | 0.000E+00 | 0.000E+00 | 0.000E+00 |
| X <sub>279</sub> | D-glucono-1,5-lactone                                           |                                       | 0.000  | 0.000 | 0.000 | 0.000E+00 | 0.000E+00 | 0.000E+00 |
| X <sub>280</sub> | 2-dehydro-D-gluconate                                           |                                       | 0.000  | 0.000 | 0.000 | 0.000E+00 | 0.000E+00 | 0.000E+00 |
| X <sub>281</sub> | 2-dehydrogluconate-6P                                           |                                       | 0.000  | 0.000 | 0.000 | 0.000E+00 | 0.000E+00 | 0.000E+00 |
| X <sub>282</sub> | 5-phospho-B-D-ribosylamine                                      |                                       | 0.000  | 0.000 | 0.000 | 0.000E+00 | 0.000E+00 | 0.000E+00 |
| X <sub>283</sub> | 5-phosphoribosylglycineamine                                    |                                       | 0.000  | 0.000 | 0.000 | 0.000E+00 | 0.000E+00 | 0.000E+00 |
| X <sub>284</sub> | 5-phosphoribosyl-N-formylglycineamide                           |                                       | 0.000  | 0.000 | 0.000 | 0.000E+00 | 0.000E+00 | 0.000E+00 |
| X <sub>285</sub> | 5-phosphoribosyl-N-formylglycineamidine                         |                                       | 0.000  | 0.000 | 0.000 | 0.000E+00 | 0.000E+00 | 0.000E+00 |
| X <sub>286</sub> | 5-aminoimidazole-ribose nucleotide                              |                                       | 0.000  | 0.000 | 0.000 | 0.000E+00 | 0.000E+00 | 0.000E+00 |
| X <sub>287</sub> | 4-carboxyaminoimidazole-ribose nucleotide                       |                                       | 0.000  | 0.000 | 0.000 | 0.000E+00 | 0.000E+00 | 0.000E+00 |
| X <sub>288</sub> | 5-phosphoribosyl-4-N-succinocarboxamide-5-aminoimidazole        |                                       | 0.000  | 0.000 | 0.000 | 0.000E+00 | 0.000E+00 | 0.000E+00 |
| X <sub>289</sub> | phosphoribosylformamidocarboxamide                              |                                       | 0.000  | 0.000 | 0.000 | 0.000E+00 | 0.000E+00 | 0.000E+00 |
| X <sub>290</sub> | inosine-5-phosphate                                             | Inosine-5'-monophosphate              | 0.517  | 0.000 | 0.000 | 9.751E-02 | 0.000E+00 | 0.000E+00 |
| X <sub>291</sub> | adenylosuccinate                                                |                                       | 0.000  | 0.000 | 0.000 | 0.000E+00 | 0.000E+00 | 0.000E+00 |
| X <sub>292</sub> | xanthosine-5-phosphate                                          |                                       | 0.000  | 0.000 | 0.000 | 0.000E+00 | 0.000E+00 | 0.000E+00 |
| X <sub>293</sub> | AMP                                                             | Adenosine-5'-monophosphate sodium s   | 0.596  | 0.000 | 0.000 | 4.763E-02 | 0.000E+00 | 0.000E+00 |
| X <sub>294</sub> | GMP                                                             | Guanosine-3'-5'-cyclic monophosphate  | -0.259 | 0.000 | 0.000 | 1.561E+00 | 0.000E+00 | 0.000E+00 |
| X <sub>295</sub> | inosine                                                         | Inosine                               | 0.242  | 0.000 | 0.000 | 4.706E-01 | 0.000E+00 | 0.000E+00 |
| X <sub>296</sub> | hypoxanthine                                                    | Hypoxanthine                          | 0.048  | 0.000 | 0.000 | 8.882E-01 | 0.000E+00 | 0.000E+00 |
| X <sub>297</sub> | xanthosine                                                      |                                       | 0.000  | 0.000 | 0.000 | 0.000E+00 | 0.000E+00 | 0.000E+00 |
| X <sub>298</sub> | guanine                                                         | Guanine                               | 0.797  | 0.000 | 0.000 | 2.242E-03 | 0.000E+00 | 0.000E+00 |
| X <sub>299</sub> | xanthine                                                        | Xanthine                              | 0.895  | 0.000 | 0.000 | 8.825E-05 | 0.000E+00 | 0.000E+00 |
| X <sub>300</sub> | urate                                                           |                                       | 0.000  | 0.000 | 0.000 | 0.000E+00 | 0.000E+00 | 0.000E+00 |
| X <sub>301</sub> | 5-hydroxyisourate                                               |                                       | 0.000  | 0.000 | 0.000 | 0.000E+00 | 0.000E+00 | 0.000E+00 |
| X <sub>302</sub> | 5-hydroxy-2-oxo-4-ureido-2,5-dihydro-1H-imidazole-5-carboxylate |                                       | 0.000  | 0.000 | 0.000 | 0.000E+00 | 0.000E+00 | 0.000E+00 |
| X <sub>303</sub> | S-allantoin                                                     | Allantoin                             | 0.737  | 0.000 | 0.000 | 7.461E-03 | 0.000E+00 | 0.000E+00 |
| X <sub>304</sub> | allantoate                                                      | Allantoic acid                        | 0.060  | 0.000 | 0.000 | 8.611E-01 | 0.000E+00 | 0.000E+00 |

|                  |                      |                                         |        |       |       |           |           |           |
|------------------|----------------------|-----------------------------------------|--------|-------|-------|-----------|-----------|-----------|
| X <sub>305</sub> | ureidoglycine        |                                         | 0.000  | 0.000 | 0.000 | 0.000E+00 | 0.000E+00 | 0.000E+00 |
| X <sub>306</sub> | ureidoglycolate      |                                         | 0.000  | 0.000 | 0.000 | 0.000E+00 | 0.000E+00 | 0.000E+00 |
| X <sub>307</sub> | urea                 |                                         | 0.000  | 0.000 | 0.000 | 0.000E+00 | 0.000E+00 | 0.000E+00 |
| X <sub>308</sub> | GDP                  |                                         | 0.000  | 0.000 | 0.000 | 0.000E+00 | 0.000E+00 | 0.000E+00 |
| X <sub>309</sub> | GTP                  |                                         | 0.000  | 0.000 | 0.000 | 0.000E+00 | 0.000E+00 | 0.000E+00 |
| X <sub>310</sub> | dGDP                 |                                         | 0.000  | 0.000 | 0.000 | 0.000E+00 | 0.000E+00 | 0.000E+00 |
| X <sub>311</sub> | dGTP                 |                                         | 0.000  | 0.000 | 0.000 | 0.000E+00 | 0.000E+00 | 0.000E+00 |
| X <sub>312</sub> | ADP                  |                                         | 0.000  | 0.000 | 0.000 | 0.000E+00 | 0.000E+00 | 0.000E+00 |
| X <sub>313</sub> | dADP                 |                                         | 0.000  | 0.000 | 0.000 | 0.000E+00 | 0.000E+00 | 0.000E+00 |
| X <sub>314</sub> | ATP                  |                                         | 0.000  | 0.000 | 0.000 | 0.000E+00 | 0.000E+00 | 0.000E+00 |
| X <sub>315</sub> | dATP                 |                                         | 0.000  | 0.000 | 0.000 | 0.000E+00 | 0.000E+00 | 0.000E+00 |
| X <sub>316</sub> | dAMP                 | 2'-Deoxyadenosine-5'-monophosphate      | 0.089  | 0.000 | 0.000 | 7.943E-01 | 0.000E+00 | 0.000E+00 |
| X <sub>317</sub> | deoxyadenosine       | 2'-Deoxyadenosine monohydrate           | 0.250  | 0.000 | 0.000 | 4.548E-01 | 0.000E+00 | 0.000E+00 |
| X <sub>318</sub> | deoxyinosine         |                                         | 0.000  | 0.000 | 0.000 | 0.000E+00 | 0.000E+00 | 0.000E+00 |
| X <sub>319</sub> | adenine              | Adenine                                 | 0.183  | 0.000 | 0.000 | 5.879E-01 | 0.000E+00 | 0.000E+00 |
| X <sub>320</sub> | guanosine            | Guanosine                               | -0.126 | 0.000 | 0.000 | 1.290E+00 | 0.000E+00 | 0.000E+00 |
| X <sub>321</sub> | NcarbamoylLaspartate | Carbamoyl-DL-aspartic acid              | -0.583 | 0.000 | 0.000 | 1.946E+00 | 0.000E+00 | 0.000E+00 |
| X <sub>322</sub> | dihydroorotate       |                                         | 0.000  | 0.000 | 0.000 | 0.000E+00 | 0.000E+00 | 0.000E+00 |
| X <sub>323</sub> | orotate              |                                         | 0.000  | 0.000 | 0.000 | 0.000E+00 | 0.000E+00 | 0.000E+00 |
| X <sub>324</sub> | orotidine-5P         |                                         | 0.000  | 0.000 | 0.000 | 0.000E+00 | 0.000E+00 | 0.000E+00 |
| X <sub>325</sub> | UMP                  | Uridine-5'-monophosphate                | 0.218  | 0.000 | 0.000 | 5.166E-01 | 0.000E+00 | 0.000E+00 |
| X <sub>326</sub> | UDP                  |                                         | 0.000  | 0.000 | 0.000 | 0.000E+00 | 0.000E+00 | 0.000E+00 |
| X <sub>327</sub> | UTP                  |                                         | 0.000  | 0.000 | 0.000 | 0.000E+00 | 0.000E+00 | 0.000E+00 |
| X <sub>328</sub> | CTP                  |                                         | 0.000  | 0.000 | 0.000 | 0.000E+00 | 0.000E+00 | 0.000E+00 |
| X <sub>329</sub> | CMP                  | Cytidine-3'-monophosphate               | 0.346  | 0.000 | 0.000 | 2.926E-01 | 0.000E+00 | 0.000E+00 |
| X <sub>330</sub> | CDP                  |                                         | 0.000  | 0.000 | 0.000 | 0.000E+00 | 0.000E+00 | 0.000E+00 |
| X <sub>331</sub> | dCDP                 |                                         | 0.000  | 0.000 | 0.000 | 0.000E+00 | 0.000E+00 | 0.000E+00 |
| X <sub>332</sub> | dCTP                 |                                         | 0.000  | 0.000 | 0.000 | 0.000E+00 | 0.000E+00 | 0.000E+00 |
| X <sub>333</sub> | dihydrouracil        | 5-6-Dihydrouracil                       | 0.924  | 0.000 | 0.000 | 1.676E-05 | 0.000E+00 | 0.000E+00 |
| X <sub>334</sub> | dUDP                 |                                         | 0.000  | 0.000 | 0.000 | 0.000E+00 | 0.000E+00 | 0.000E+00 |
| X <sub>335</sub> | uracil               |                                         | 0.000  | 0.000 | 0.000 | 0.000E+00 | 0.000E+00 | 0.000E+00 |
| X <sub>336</sub> | dUTP                 |                                         | 0.000  | 0.000 | 0.000 | 0.000E+00 | 0.000E+00 | 0.000E+00 |
| X <sub>337</sub> | dUMP                 |                                         | 0.000  | 0.000 | 0.000 | 0.000E+00 | 0.000E+00 | 0.000E+00 |
| X <sub>338</sub> | dTMP                 |                                         | 0.000  | 0.000 | 0.000 | 0.000E+00 | 0.000E+00 | 0.000E+00 |
| X <sub>339</sub> | dTDP                 |                                         | 0.000  | 0.000 | 0.000 | 0.000E+00 | 0.000E+00 | 0.000E+00 |
| X <sub>340</sub> | dTTP                 |                                         | 0.000  | 0.000 | 0.000 | 0.000E+00 | 0.000E+00 | 0.000E+00 |
| X <sub>341</sub> | dCMP                 |                                         | 0.000  | 0.000 | 0.000 | 0.000E+00 | 0.000E+00 | 0.000E+00 |
| X <sub>342</sub> | deoxycytidine        | 2'-Deoxycytidine                        | 0.215  | 0.000 | 0.000 | 5.234E-01 | 0.000E+00 | 0.000E+00 |
| X <sub>343</sub> | deoxyuridine         | (+)-2'-Deoxyuridine                     | 0.698  | 0.000 | 0.000 | 1.374E-02 | 0.000E+00 | 0.000E+00 |
| X <sub>344</sub> | 3-ureidopropionate   | 3-ureidopropionic acid                  | 0.824  | 0.000 | 0.000 | 1.140E-03 | 0.000E+00 | 0.000E+00 |
| X <sub>345</sub> | thymidine            | Thymidine                               | 0.815  | 0.000 | 0.000 | 1.447E-03 | 0.000E+00 | 0.000E+00 |
| X <sub>346</sub> | thymine              |                                         | 0.000  | 0.000 | 0.000 | 0.000E+00 | 0.000E+00 | 0.000E+00 |
| X <sub>347</sub> | dihydrothymine       |                                         | 0.000  | 0.000 | 0.000 | 0.000E+00 | 0.000E+00 | 0.000E+00 |
| X <sub>348</sub> | 3-ureidoisobutyrate  |                                         | 0.000  | 0.000 | 0.000 | 0.000E+00 | 0.000E+00 | 0.000E+00 |
| X <sub>349</sub> | 3-aminoisobutanoate  |                                         | 0.000  | 0.000 | 0.000 | 0.000E+00 | 0.000E+00 | 0.000E+00 |
| X <sub>350</sub> | cytidine             | Cytidine-cell culture tested            | -0.232 | 0.000 | 0.000 | 1.512E+00 | 0.000E+00 | 0.000E+00 |
| X <sub>351</sub> | uridine              | Uridine                                 | -0.715 | 0.000 | 0.000 | 1.989E+00 | 0.000E+00 | 0.000E+00 |
| X <sub>352</sub> |                      | (-)-Norepinephrine                      | 0.000  | 0.000 | 0.000 | 0.000E+00 | 0.000E+00 | 0.000E+00 |
| X <sub>353</sub> |                      | (-)-Riboflavin                          | 0.000  | 0.000 | 0.000 | 0.000E+00 | 0.000E+00 | 0.000E+00 |
| X <sub>354</sub> |                      | (+)-Jasmonic acid                       | 0.000  | 0.000 | 0.000 | 0.000E+00 | 0.000E+00 | 0.000E+00 |
| X <sub>355</sub> |                      | (2R)-2-Hydroxy-2-phenethylglucosinola   | 0.000  | 0.000 | 0.000 | 0.000E+00 | 0.000E+00 | 0.000E+00 |
| X <sub>356</sub> |                      | 10-camphorsulfonic acid                 | 0.000  | 0.000 | 0.000 | 0.000E+00 | 0.000E+00 | 0.000E+00 |
| X <sub>357</sub> |                      | 1-1-Dimethylbiguanide hydrochloride     | 0.000  | 0.000 | 0.000 | 0.000E+00 | 0.000E+00 | 0.000E+00 |
| X <sub>358</sub> |                      | 1i.D(-)-Fructose_D-(+)-Galactose_D-     | 0.000  | 0.000 | 0.000 | 0.000E+00 | 0.000E+00 | 0.000E+00 |
| X <sub>359</sub> |                      | 1-Amino-1-cyclopentanecarboxylic acid   | 0.000  | 0.000 | 0.000 | 0.000E+00 | 0.000E+00 | 0.000E+00 |
| X <sub>360</sub> |                      | 1-Aminocyclopropane-1-carboxylic acid   | 0.000  | 0.000 | 0.000 | 0.000E+00 | 0.000E+00 | 0.000E+00 |
| X <sub>361</sub> |                      | 1-Isothiocyanato-6-(methylsulfonyl)-hex | 0.000  | 0.000 | 0.000 | 0.000E+00 | 0.000E+00 | 0.000E+00 |
| X <sub>362</sub> |                      | 1-Isothiocyanato-6-(methylsulfonyl)-he  | 0.000  | 0.000 | 0.000 | 0.000E+00 | 0.000E+00 | 0.000E+00 |
| X <sub>363</sub> |                      | 1-Methylguanidine hydrochloride         | 0.000  | 0.000 | 0.000 | 0.000E+00 | 0.000E+00 | 0.000E+00 |
| X <sub>364</sub> |                      | 1-Methylhistamine dihydrochloride       | 0.000  | 0.000 | 0.000 | 0.000E+00 | 0.000E+00 | 0.000E+00 |
| X <sub>365</sub> |                      | 1-O-b-D-glucopyranosyl sinapate         | 0.000  | 0.000 | 0.000 | 0.000E+00 | 0.000E+00 | 0.000E+00 |

|                  |  |                                           |       |       |       |           |           |           |
|------------------|--|-------------------------------------------|-------|-------|-------|-----------|-----------|-----------|
| X <sub>366</sub> |  | 2-Aminoethylphosphonic acid               | 0.000 | 0.000 | 0.000 | 0.000E+00 | 0.000E+00 | 0.000E+00 |
| X <sub>367</sub> |  | 2-Deoxyguanosine monohydrate              | 0.000 | 0.000 | 0.000 | 0.000E+00 | 0.000E+00 | 0.000E+00 |
| X <sub>368</sub> |  | 2-Deoxyribose-5-phosphate sodium salt     | 0.000 | 0.000 | 0.000 | 0.000E+00 | 0.000E+00 | 0.000E+00 |
| X <sub>369</sub> |  | 2i_1-3-Diaminopropane dihydrochloride     | 0.000 | 0.000 | 0.000 | 0.000E+00 | 0.000E+00 | 0.000E+00 |
| X <sub>370</sub> |  | 2i_Adipic acid_2-Methylglutaric Acid      | 0.000 | 0.000 | 0.000 | 0.000E+00 | 0.000E+00 | 0.000E+00 |
| X <sub>371</sub> |  | 2i_alpha-Ketoglutaric acid disodium salt  | 0.000 | 0.000 | 0.000 | 0.000E+00 | 0.000E+00 | 0.000E+00 |
| X <sub>372</sub> |  | 2i_alpha-Lipoamide_DL-Thioctamide         | 0.000 | 0.000 | 0.000 | 0.000E+00 | 0.000E+00 | 0.000E+00 |
| X <sub>373</sub> |  | 2i_cyanidin-3-5-di-O-glucoside chloride   | 0.000 | 0.000 | 0.000 | 0.000E+00 | 0.000E+00 | 0.000E+00 |
| X <sub>374</sub> |  | 2i_D(-)-Ribose_D-Xylulose                 | 0.000 | 0.000 | 0.000 | 0.000E+00 | 0.000E+00 | 0.000E+00 |
| X <sub>375</sub> |  | 2i_D(+)-Cellobiose_Lactulose              | 0.000 | 0.000 | 0.000 | 0.000E+00 | 0.000E+00 | 0.000E+00 |
| X <sub>376</sub> |  | 2i_D(+)-Cellobiose_Lactulose              | 0.000 | 0.000 | 0.000 | 0.000E+00 | 0.000E+00 | 0.000E+00 |
| X <sub>377</sub> |  | 2i_D(+)-Melezitose monohydrate_1-Kes      | 0.000 | 0.000 | 0.000 | 0.000E+00 | 0.000E+00 | 0.000E+00 |
| X <sub>378</sub> |  | 2i_D-Mannose-6-phosphate barium salt      | 0.000 | 0.000 | 0.000 | 0.000E+00 | 0.000E+00 | 0.000E+00 |
| X <sub>379</sub> |  | 2i_eriodictyol-7-O-glucoside_Marein       | 0.000 | 0.000 | 0.000 | 0.000E+00 | 0.000E+00 | 0.000E+00 |
| X <sub>380</sub> |  | 2i_Ideain chloride_cyanidin-3-glucoside c | 0.000 | 0.000 | 0.000 | 0.000E+00 | 0.000E+00 | 0.000E+00 |
| X <sub>381</sub> |  | 2i_Indole-3-carboxyaldehyde_Indole-3-a    | 0.000 | 0.000 | 0.000 | 0.000E+00 | 0.000E+00 | 0.000E+00 |
| X <sub>382</sub> |  | 2i_Kaempferol-3-Glucoside-2-Rhamnos       | 0.000 | 0.000 | 0.000 | 0.000E+00 | 0.000E+00 | 0.000E+00 |
| X <sub>383</sub> |  | 2i_L-Norleucine_D-Alloisoleucine          | 0.000 | 0.000 | 0.000 | 0.000E+00 | 0.000E+00 | 0.000E+00 |
| X <sub>384</sub> |  | 2i_Maritimein_luteolin-7-O-glucoside      | 0.000 | 0.000 | 0.000 | 0.000E+00 | 0.000E+00 | 0.000E+00 |
| X <sub>385</sub> |  | 2i_Nicotinic Acid_Isonicotinic acid       | 0.000 | 0.000 | 0.000 | 0.000E+00 | 0.000E+00 | 0.000E+00 |
| X <sub>386</sub> |  | 2i_Quercitrin_Quercetin-7-O-rhamnosid     | 0.000 | 0.000 | 0.000 | 0.000E+00 | 0.000E+00 | 0.000E+00 |
| X <sub>387</sub> |  | 2i_Rutin_Quercetin-3-O-b-glucopyrano      | 0.000 | 0.000 | 0.000 | 0.000E+00 | 0.000E+00 | 0.000E+00 |
| X <sub>388</sub> |  | 2i_Sarsapogenine_Smilagenin               | 0.000 | 0.000 | 0.000 | 0.000E+00 | 0.000E+00 | 0.000E+00 |
| X <sub>389</sub> |  | 2i_Theophylline-anhydrous_1-7-Dimethy     | 0.000 | 0.000 | 0.000 | 0.000E+00 | 0.000E+00 | 0.000E+00 |
| X <sub>390</sub> |  | 2i_Uridine-5'-diphospho-N-acetylgalact    | 0.000 | 0.000 | 0.000 | 0.000E+00 | 0.000E+00 | 0.000E+00 |
| X <sub>391</sub> |  | 2-Isopropylmalic acid                     | 0.000 | 0.000 | 0.000 | 0.000E+00 | 0.000E+00 | 0.000E+00 |
| X <sub>392</sub> |  | 3-5-Dimethoxycinnamic acid (predomina     | 0.000 | 0.000 | 0.000 | 0.000E+00 | 0.000E+00 | 0.000E+00 |
| X <sub>393</sub> |  | 3-Chloro-L-tyrosine hydrochloride         | 0.000 | 0.000 | 0.000 | 0.000E+00 | 0.000E+00 | 0.000E+00 |
| X <sub>394</sub> |  | 3-cyanopyridine                           | 0.000 | 0.000 | 0.000 | 0.000E+00 | 0.000E+00 | 0.000E+00 |
| X <sub>395</sub> |  | 3-Dephosphocoenzyme A                     | 0.000 | 0.000 | 0.000 | 0.000E+00 | 0.000E+00 | 0.000E+00 |
| X <sub>396</sub> |  | 3-hydroxy-3-methylbutanoic acid           | 0.000 | 0.000 | 0.000 | 0.000E+00 | 0.000E+00 | 0.000E+00 |
| X <sub>397</sub> |  | 3-Hydroxy-3-methylglutarate               | 0.000 | 0.000 | 0.000 | 0.000E+00 | 0.000E+00 | 0.000E+00 |
| X <sub>398</sub> |  | 3i_Glycolaldehyde dimer-mixture of ster   | 0.000 | 0.000 | 0.000 | 0.000E+00 | 0.000E+00 | 0.000E+00 |
| X <sub>399</sub> |  | 3i_Isorhamnetin-3-Glucoside-6-Rhamnd      | 0.000 | 0.000 | 0.000 | 0.000E+00 | 0.000E+00 | 0.000E+00 |
| X <sub>400</sub> |  | 3i_L-Iditol_D-Sorbitol_D(-)-Mannitol      | 0.000 | 0.000 | 0.000 | 0.000E+00 | 0.000E+00 | 0.000E+00 |
| X <sub>401</sub> |  | 3i_L-Threonine_-Methyl-DL-serine_L-H      | 0.000 | 0.000 | 0.000 | 0.000E+00 | 0.000E+00 | 0.000E+00 |
| X <sub>402</sub> |  | 3i_Sodium pantothenate_D-Pantothenic      | 0.000 | 0.000 | 0.000 | 0.000E+00 | 0.000E+00 | 0.000E+00 |
| X <sub>403</sub> |  | 3i_Uridine-5'-diphosphogalactose disodi   | 0.000 | 0.000 | 0.000 | 0.000E+00 | 0.000E+00 | 0.000E+00 |
| X <sub>404</sub> |  | 3-Methyl-L-histidine                      | 0.000 | 0.000 | 0.000 | 0.000E+00 | 0.000E+00 | 0.000E+00 |
| X <sub>405</sub> |  | 4-(Methylsulfinyl)but-3-enylglucosinol    | 0.000 | 0.000 | 0.000 | 0.000E+00 | 0.000E+00 | 0.000E+00 |
| X <sub>406</sub> |  | 4-Hydroxybenzoate                         | 0.000 | 0.000 | 0.000 | 0.000E+00 | 0.000E+00 | 0.000E+00 |
| X <sub>407</sub> |  | 4i_Kaempferol-3-Rhamnoside-7-Rhamn        | 0.000 | 0.000 | 0.000 | 0.000E+00 | 0.000E+00 | 0.000E+00 |
| X <sub>408</sub> |  | 4i_L(+)-ArginineJHCl_Nalpha-Acetyl-L-c    | 0.000 | 0.000 | 0.000 | 0.000E+00 | 0.000E+00 | 0.000E+00 |
| X <sub>409</sub> |  | 4-Methyl-5-thiazoleethanol                | 0.000 | 0.000 | 0.000 | 0.000E+00 | 0.000E+00 | 0.000E+00 |
| X <sub>410</sub> |  | 4-Nitrophenol                             | 0.000 | 0.000 | 0.000 | 0.000E+00 | 0.000E+00 | 0.000E+00 |
| X <sub>411</sub> |  | 4-Pyridoxate                              | 0.000 | 0.000 | 0.000 | 0.000E+00 | 0.000E+00 | 0.000E+00 |
| X <sub>412</sub> |  | 5-Aminovaleric acid                       | 0.000 | 0.000 | 0.000 | 0.000E+00 | 0.000E+00 | 0.000E+00 |
| X <sub>413</sub> |  | 5-Hydroxyindole-3-acetate (5-HIAA)        | 0.000 | 0.000 | 0.000 | 0.000E+00 | 0.000E+00 | 0.000E+00 |
| X <sub>414</sub> |  | 5-Methylcytosine hydrochloride            | 0.000 | 0.000 | 0.000 | 0.000E+00 | 0.000E+00 | 0.000E+00 |
| X <sub>415</sub> |  | 6-Aminohexanoic acid                      | 0.000 | 0.000 | 0.000 | 0.000E+00 | 0.000E+00 | 0.000E+00 |
| X <sub>416</sub> |  | 6i_Melibiose hydrate_D(+)-Turanose_Isc    | 0.000 | 0.000 | 0.000 | 0.000E+00 | 0.000E+00 | 0.000E+00 |
| X <sub>417</sub> |  | 7i_kaempferol-3-O-rutinoside              | 0.000 | 0.000 | 0.000 | 0.000E+00 | 0.000E+00 | 0.000E+00 |
| X <sub>418</sub> |  | Acetaminophen                             | 0.000 | 0.000 | 0.000 | 0.000E+00 | 0.000E+00 | 0.000E+00 |
| X <sub>419</sub> |  | Acetylcholine chloride                    | 0.000 | 0.000 | 0.000 | 0.000E+00 | 0.000E+00 | 0.000E+00 |
| X <sub>420</sub> |  | Adenosine 3'-monophosphate From Yea       | 0.000 | 0.000 | 0.000 | 0.000E+00 | 0.000E+00 | 0.000E+00 |
| X <sub>421</sub> |  | Adenosine-5'-phosphosulfate sodium sa     | 0.000 | 0.000 | 0.000 | 0.000E+00 | 0.000E+00 | 0.000E+00 |
| X <sub>422</sub> |  | Agmatine sulfate salt                     | 0.000 | 0.000 | 0.000 | 0.000E+00 | 0.000E+00 | 0.000E+00 |
| X <sub>423</sub> |  | alpha-Lactose monohydrate                 | 0.000 | 0.000 | 0.000 | 0.000E+00 | 0.000E+00 | 0.000E+00 |
| X <sub>424</sub> |  | alpha-Methyl-DL-histidine dihydrochlor    | 0.000 | 0.000 | 0.000 | 0.000E+00 | 0.000E+00 | 0.000E+00 |
| X <sub>425</sub> |  | alpha-Tocotrienol                         | 0.000 | 0.000 | 0.000 | 0.000E+00 | 0.000E+00 | 0.000E+00 |
| X <sub>426</sub> |  | Amantadine hydrochloride                  | 0.000 | 0.000 | 0.000 | 0.000E+00 | 0.000E+00 | 0.000E+00 |

|                  |  |                                        |       |       |       |           |           |           |
|------------------|--|----------------------------------------|-------|-------|-------|-----------|-----------|-----------|
| X <sub>427</sub> |  | Benzylglucosinolate                    | 0.000 | 0.000 | 0.000 | 0.000E+00 | 0.000E+00 | 0.000E+00 |
| X <sub>428</sub> |  | Betaine                                | 0.000 | 0.000 | 0.000 | 0.000E+00 | 0.000E+00 | 0.000E+00 |
| X <sub>429</sub> |  | beta-Nicotinamide adenine dinucleotide | 0.000 | 0.000 | 0.000 | 0.000E+00 | 0.000E+00 | 0.000E+00 |
| X <sub>430</sub> |  | beta-Nicotinamide mononucleotide       | 0.000 | 0.000 | 0.000 | 0.000E+00 | 0.000E+00 | 0.000E+00 |
| X <sub>431</sub> |  | Callistephin Chloride                  | 0.000 | 0.000 | 0.000 | 0.000E+00 | 0.000E+00 | 0.000E+00 |
| X <sub>432</sub> |  | Choline chloride                       | 0.000 | 0.000 | 0.000 | 0.000E+00 | 0.000E+00 | 0.000E+00 |
| X <sub>433</sub> |  | cis or trans-Cinnamyl alcohol          | 0.000 | 0.000 | 0.000 | 0.000E+00 | 0.000E+00 | 0.000E+00 |
| X <sub>434</sub> |  | Citramalic acid                        | 0.000 | 0.000 | 0.000 | 0.000E+00 | 0.000E+00 | 0.000E+00 |
| X <sub>435</sub> |  | Creatinine-anhydrous                   | 0.000 | 0.000 | 0.000 | 0.000E+00 | 0.000E+00 | 0.000E+00 |
| X <sub>436</sub> |  | Cyanidin-3-O-(2-O-beta-xylopyranosyl   | 0.000 | 0.000 | 0.000 | 0.000E+00 | 0.000E+00 | 0.000E+00 |
| X <sub>437</sub> |  | Cyanidin-3-O-(2-O-beta-xylopyranosyl   | 0.000 | 0.000 | 0.000 | 0.000E+00 | 0.000E+00 | 0.000E+00 |
| X <sub>438</sub> |  | cyanidin-3-O-rhamnoside chloride       | 0.000 | 0.000 | 0.000 | 0.000E+00 | 0.000E+00 | 0.000E+00 |
| X <sub>439</sub> |  | cysteinylglycine                       | 0.000 | 0.000 | 0.000 | 0.000E+00 | 0.000E+00 | 0.000E+00 |
| X <sub>440</sub> |  | Cytidine-5'-diphosphocholine sodium sa | 0.000 | 0.000 | 0.000 | 0.000E+00 | 0.000E+00 | 0.000E+00 |
| X <sub>441</sub> |  | Cytidine-5'-monophosphate disodium sa  | 0.000 | 0.000 | 0.000 | 0.000E+00 | 0.000E+00 | 0.000E+00 |
| X <sub>442</sub> |  | D-(-)-Quinic acid                      | 0.000 | 0.000 | 0.000 | 0.000E+00 | 0.000E+00 | 0.000E+00 |
| X <sub>443</sub> |  | D-(+)-Raffinose pentahydrate           | 0.000 | 0.000 | 0.000 | 0.000E+00 | 0.000E+00 | 0.000E+00 |
| X <sub>444</sub> |  | D-Ala-D-ala                            | 0.000 | 0.000 | 0.000 | 0.000E+00 | 0.000E+00 | 0.000E+00 |
| X <sub>445</sub> |  | Daphnetin                              | 0.000 | 0.000 | 0.000 | 0.000E+00 | 0.000E+00 | 0.000E+00 |
| X <sub>446</sub> |  | Delphinidin-3-O-(6-O-alpha-rhamnopyr   | 0.000 | 0.000 | 0.000 | 0.000E+00 | 0.000E+00 | 0.000E+00 |
| X <sub>447</sub> |  | D-Glucoheptose                         | 0.000 | 0.000 | 0.000 | 0.000E+00 | 0.000E+00 | 0.000E+00 |
| X <sub>448</sub> |  | Diethanolamine                         | 0.000 | 0.000 | 0.000 | 0.000E+00 | 0.000E+00 | 0.000E+00 |
| X <sub>449</sub> |  | DL-2-3-Diaminopropionic acid monohyd   | 0.000 | 0.000 | 0.000 | 0.000E+00 | 0.000E+00 | 0.000E+00 |
| X <sub>450</sub> |  | DL-beta-Hydroxybutyric acid            | 0.000 | 0.000 | 0.000 | 0.000E+00 | 0.000E+00 | 0.000E+00 |
| X <sub>451</sub> |  | DL-Glyceric Acid calcium Salt          | 0.000 | 0.000 | 0.000 | 0.000E+00 | 0.000E+00 | 0.000E+00 |
| X <sub>452</sub> |  | DL-homocystine                         | 0.000 | 0.000 | 0.000 | 0.000E+00 | 0.000E+00 | 0.000E+00 |
| X <sub>453</sub> |  | DL-threo-beta-Methylaspartic acid      | 0.000 | 0.000 | 0.000 | 0.000E+00 | 0.000E+00 | 0.000E+00 |
| X <sub>454</sub> |  | D-Panose                               | 0.000 | 0.000 | 0.000 | 0.000E+00 | 0.000E+00 | 0.000E+00 |
| X <sub>455</sub> |  | dUDP                                   | 0.000 | 0.000 | 0.000 | 0.000E+00 | 0.000E+00 | 0.000E+00 |
| X <sub>456</sub> |  | gamma-Amino-n-butyric acid             | 0.000 | 0.000 | 0.000 | 0.000E+00 | 0.000E+00 | 0.000E+00 |
| X <sub>457</sub> |  | Gluconasturtiin                        | 0.000 | 0.000 | 0.000 | 0.000E+00 | 0.000E+00 | 0.000E+00 |
| X <sub>458</sub> |  | Glycocyanine                           | 0.000 | 0.000 | 0.000 | 0.000E+00 | 0.000E+00 | 0.000E+00 |
| X <sub>459</sub> |  | Glycyl-L-proline                       | 0.000 | 0.000 | 0.000 | 0.000E+00 | 0.000E+00 | 0.000E+00 |
| X <sub>460</sub> |  | Guanosine-5'-diphospho-beta-L-fucose   | 0.000 | 0.000 | 0.000 | 0.000E+00 | 0.000E+00 | 0.000E+00 |
| X <sub>461</sub> |  | Guanosine-5'-diphosphoglucose sodium   | 0.000 | 0.000 | 0.000 | 0.000E+00 | 0.000E+00 | 0.000E+00 |
| X <sub>462</sub> |  | Guanosine-5'-monophosphate Jdisodium   | 0.000 | 0.000 | 0.000 | 0.000E+00 | 0.000E+00 | 0.000E+00 |
| X <sub>463</sub> |  | Hesperetin                             | 0.000 | 0.000 | 0.000 | 0.000E+00 | 0.000E+00 | 0.000E+00 |
| X <sub>464</sub> |  | Hesperidin                             | 0.000 | 0.000 | 0.000 | 0.000E+00 | 0.000E+00 | 0.000E+00 |
| X <sub>465</sub> |  | Isoguvacine hydrochloride              | 0.000 | 0.000 | 0.000 | 0.000E+00 | 0.000E+00 | 0.000E+00 |
| X <sub>466</sub> |  | isorhamnetin-3-O-glucoside             | 0.000 | 0.000 | 0.000 | 0.000E+00 | 0.000E+00 | 0.000E+00 |
| X <sub>467</sub> |  | Itaconic acid                          | 0.000 | 0.000 | 0.000 | 0.000E+00 | 0.000E+00 | 0.000E+00 |
| X <sub>468</sub> |  | Kaempferol-3-Galactoside-6-Rhamnosi    | 0.000 | 0.000 | 0.000 | 0.000E+00 | 0.000E+00 | 0.000E+00 |
| X <sub>469</sub> |  | Kaempferol-7-O-alpha-L-rhamnoside      | 0.000 | 0.000 | 0.000 | 0.000E+00 | 0.000E+00 | 0.000E+00 |
| X <sub>470</sub> |  | Keracyanin Chloride                    | 0.000 | 0.000 | 0.000 | 0.000E+00 | 0.000E+00 | 0.000E+00 |
| X <sub>471</sub> |  | L-Anserine nitrate salt                | 0.000 | 0.000 | 0.000 | 0.000E+00 | 0.000E+00 | 0.000E+00 |
| X <sub>472</sub> |  | L-beta-homoglutamine-HCl               | 0.000 | 0.000 | 0.000 | 0.000E+00 | 0.000E+00 | 0.000E+00 |
| X <sub>473</sub> |  | L-beta-homoleucine-HCl                 | 0.000 | 0.000 | 0.000 | 0.000E+00 | 0.000E+00 | 0.000E+00 |
| X <sub>474</sub> |  | L-beta-homolysine-2HCl                 | 0.000 | 0.000 | 0.000 | 0.000E+00 | 0.000E+00 | 0.000E+00 |
| X <sub>475</sub> |  | L-beta-homoproline-HCl                 | 0.000 | 0.000 | 0.000 | 0.000E+00 | 0.000E+00 | 0.000E+00 |
| X <sub>476</sub> |  | L-beta-homothreonine                   | 0.000 | 0.000 | 0.000 | 0.000E+00 | 0.000E+00 | 0.000E+00 |
| X <sub>477</sub> |  | L-Carnosine                            | 0.000 | 0.000 | 0.000 | 0.000E+00 | 0.000E+00 | 0.000E+00 |
| X <sub>478</sub> |  | L-Cystine                              | 0.000 | 0.000 | 0.000 | 0.000E+00 | 0.000E+00 | 0.000E+00 |
| X <sub>479</sub> |  | L-Glutathione (reduced form)           | 0.000 | 0.000 | 0.000 | 0.000E+00 | 0.000E+00 | 0.000E+00 |
| X <sub>480</sub> |  | Lidocain                               | 0.000 | 0.000 | 0.000 | 0.000E+00 | 0.000E+00 | 0.000E+00 |
| X <sub>481</sub> |  | Lignoceric Acid                        | 0.000 | 0.000 | 0.000 | 0.000E+00 | 0.000E+00 | 0.000E+00 |
| X <sub>482</sub> |  | L-Kynurenine                           | 0.000 | 0.000 | 0.000 | 0.000E+00 | 0.000E+00 | 0.000E+00 |
| X <sub>483</sub> |  | L-Pyrogutamic acid                     | 0.000 | 0.000 | 0.000 | 0.000E+00 | 0.000E+00 | 0.000E+00 |
| X <sub>484</sub> |  | L-Threonic acid hemicalcium salt       | 0.000 | 0.000 | 0.000 | 0.000E+00 | 0.000E+00 | 0.000E+00 |
| X <sub>485</sub> |  | luteolin-4'-O-glucoside                | 0.000 | 0.000 | 0.000 | 0.000E+00 | 0.000E+00 | 0.000E+00 |
| X <sub>486</sub> |  | Maleic acid                            | 0.000 | 0.000 | 0.000 | 0.000E+00 | 0.000E+00 | 0.000E+00 |
| X <sub>487</sub> |  | Maltitol                               | 0.000 | 0.000 | 0.000 | 0.000E+00 | 0.000E+00 | 0.000E+00 |

|                  |  |                                      |       |       |       |           |           |           |
|------------------|--|--------------------------------------|-------|-------|-------|-----------|-----------|-----------|
| X <sub>488</sub> |  | Methionine sulfoxide                 | 0.000 | 0.000 | 0.000 | 0.000E+00 | 0.000E+00 | 0.000E+00 |
| X <sub>489</sub> |  | Methylmalonic acid                   | 0.000 | 0.000 | 0.000 | 0.000E+00 | 0.000E+00 | 0.000E+00 |
| X <sub>490</sub> |  | m-Hydroxycinnamic acid               | 0.000 | 0.000 | 0.000 | 0.000E+00 | 0.000E+00 | 0.000E+00 |
| X <sub>491</sub> |  | mucic acid                           | 0.000 | 0.000 | 0.000 | 0.000E+00 | 0.000E+00 | 0.000E+00 |
| X <sub>492</sub> |  | N-6-(delta-2-Isopentenyl)adenosine   | 0.000 | 0.000 | 0.000 | 0.000E+00 | 0.000E+00 | 0.000E+00 |
| X <sub>493</sub> |  | N-acetyl putrescine hydrochloride    | 0.000 | 0.000 | 0.000 | 0.000E+00 | 0.000E+00 | 0.000E+00 |
| X <sub>494</sub> |  | N-Acetyl-DL-aspartic acid            | 0.000 | 0.000 | 0.000 | 0.000E+00 | 0.000E+00 | 0.000E+00 |
| X <sub>495</sub> |  | N-acetyl-DL-serine                   | 0.000 | 0.000 | 0.000 | 0.000E+00 | 0.000E+00 | 0.000E+00 |
| X <sub>496</sub> |  | N-acetyl-D-mannosamine               | 0.000 | 0.000 | 0.000 | 0.000E+00 | 0.000E+00 | 0.000E+00 |
| X <sub>497</sub> |  | N-Acetylglycine                      | 0.000 | 0.000 | 0.000 | 0.000E+00 | 0.000E+00 | 0.000E+00 |
| X <sub>498</sub> |  | N-acetylneuraminic acid-Type IV-S-Sy | 0.000 | 0.000 | 0.000 | 0.000E+00 | 0.000E+00 | 0.000E+00 |
| X <sub>499</sub> |  | naringenin-7-O-glucoside             | 0.000 | 0.000 | 0.000 | 0.000E+00 | 0.000E+00 | 0.000E+00 |
| X <sub>500</sub> |  | Neofericitrin                        | 0.000 | 0.000 | 0.000 | 0.000E+00 | 0.000E+00 | 0.000E+00 |
| X <sub>501</sub> |  | Neohesperidin                        | 0.000 | 0.000 | 0.000 | 0.000E+00 | 0.000E+00 | 0.000E+00 |
| X <sub>502</sub> |  | Nicotinic acid mono nucleotide       | 0.000 | 0.000 | 0.000 | 0.000E+00 | 0.000E+00 | 0.000E+00 |
| X <sub>503</sub> |  | Nystose Trihydrate                   | 0.000 | 0.000 | 0.000 | 0.000E+00 | 0.000E+00 | 0.000E+00 |
| X <sub>504</sub> |  | O-Acetyl-L-homoserine hydrochloride  | 0.000 | 0.000 | 0.000 | 0.000E+00 | 0.000E+00 | 0.000E+00 |
| X <sub>505</sub> |  | o-Anisic Acid                        | 0.000 | 0.000 | 0.000 | 0.000E+00 | 0.000E+00 | 0.000E+00 |
| X <sub>506</sub> |  | O-Phosphocholine                     | 0.000 | 0.000 | 0.000 | 0.000E+00 | 0.000E+00 | 0.000E+00 |
| X <sub>507</sub> |  | O-Succinyl-L-homoserine              | 0.000 | 0.000 | 0.000 | 0.000E+00 | 0.000E+00 | 0.000E+00 |
| X <sub>508</sub> |  | Pimelic acid                         | 0.000 | 0.000 | 0.000 | 0.000E+00 | 0.000E+00 | 0.000E+00 |
| X <sub>509</sub> |  | Puerarin                             | 0.000 | 0.000 | 0.000 | 0.000E+00 | 0.000E+00 | 0.000E+00 |
| X <sub>510</sub> |  | pyridoxal hydrochloride              | 0.000 | 0.000 | 0.000 | 0.000E+00 | 0.000E+00 | 0.000E+00 |
| X <sub>511</sub> |  | pyridoxal-5'-phosphate hydrate       | 0.000 | 0.000 | 0.000 | 0.000E+00 | 0.000E+00 | 0.000E+00 |
| X <sub>512</sub> |  | Pyridoxamine dihydrochloride         | 0.000 | 0.000 | 0.000 | 0.000E+00 | 0.000E+00 | 0.000E+00 |
| X <sub>513</sub> |  | Pyridoxine                           | 0.000 | 0.000 | 0.000 | 0.000E+00 | 0.000E+00 | 0.000E+00 |
| X <sub>514</sub> |  | Quercetin-3-7-O-alpha-L-dirhamnopyr  | 0.000 | 0.000 | 0.000 | 0.000E+00 | 0.000E+00 | 0.000E+00 |
| X <sub>515</sub> |  | Quercetin-3-O-alpha-L-rhamnopyranos  | 0.000 | 0.000 | 0.000 | 0.000E+00 | 0.000E+00 | 0.000E+00 |
| X <sub>516</sub> |  | Robinin                              | 0.000 | 0.000 | 0.000 | 0.000E+00 | 0.000E+00 | 0.000E+00 |
| X <sub>517</sub> |  | Safranin                             | 0.000 | 0.000 | 0.000 | 0.000E+00 | 0.000E+00 | 0.000E+00 |
| X <sub>518</sub> |  | Salicylic Acid                       | 0.000 | 0.000 | 0.000 | 0.000E+00 | 0.000E+00 | 0.000E+00 |
| X <sub>519</sub> |  | Sinapic acid                         | 0.000 | 0.000 | 0.000 | 0.000E+00 | 0.000E+00 | 0.000E+00 |
| X <sub>520</sub> |  | Sinapine                             | 0.000 | 0.000 | 0.000 | 0.000E+00 | 0.000E+00 | 0.000E+00 |
| X <sub>521</sub> |  | Sinapoyl malate                      | 0.000 | 0.000 | 0.000 | 0.000E+00 | 0.000E+00 | 0.000E+00 |
| X <sub>522</sub> |  | S-Methyl-L-cysteine                  | 0.000 | 0.000 | 0.000 | 0.000E+00 | 0.000E+00 | 0.000E+00 |
| X <sub>523</sub> |  | sn-Glycero-3-phosphocholine 1:1 cadm | 0.000 | 0.000 | 0.000 | 0.000E+00 | 0.000E+00 | 0.000E+00 |
| X <sub>524</sub> |  | Suberic acid                         | 0.000 | 0.000 | 0.000 | 0.000E+00 | 0.000E+00 | 0.000E+00 |
| X <sub>525</sub> |  | Sucrose                              | 0.000 | 0.000 | 0.000 | 0.000E+00 | 0.000E+00 | 0.000E+00 |
| X <sub>526</sub> |  | Thiamine hydrochloride               | 0.000 | 0.000 | 0.000 | 0.000E+00 | 0.000E+00 | 0.000E+00 |
| X <sub>527</sub> |  | Thioglycolic acid solution           | 0.000 | 0.000 | 0.000 | 0.000E+00 | 0.000E+00 | 0.000E+00 |
| X <sub>528</sub> |  | trans-Zeatin-riboside                | 0.000 | 0.000 | 0.000 | 0.000E+00 | 0.000E+00 | 0.000E+00 |
| X <sub>529</sub> |  | Trimethylamine N-oxide dihydrate     | 0.000 | 0.000 | 0.000 | 0.000E+00 | 0.000E+00 | 0.000E+00 |
| X <sub>530</sub> |  | UDP-beta-L-rhamnose                  | 0.000 | 0.000 | 0.000 | 0.000E+00 | 0.000E+00 | 0.000E+00 |
| X <sub>531</sub> |  | UDP-xylose                           | 0.000 | 0.000 | 0.000 | 0.000E+00 | 0.000E+00 | 0.000E+00 |
| X <sub>532</sub> |  | Vanillin                             | 0.000 | 0.000 | 0.000 | 0.000E+00 | 0.000E+00 | 0.000E+00 |
| X <sub>533</sub> |  | Zeatin-9-glucoside                   | 0.000 | 0.000 | 0.000 | 0.000E+00 | 0.000E+00 | 0.000E+00 |
